# Supplementary material for: Rejuvenating the ocean: mean ocean radiocarbon, CO 2 release, and radiocarbon budget closure across the last deglaciation
Source: Copernicus journal article supplement (doi:10.5194/cp-2023-24), 2023-05-04
Supplement: Supplementary file 1 [file cp-2023-24-supplement.zip]

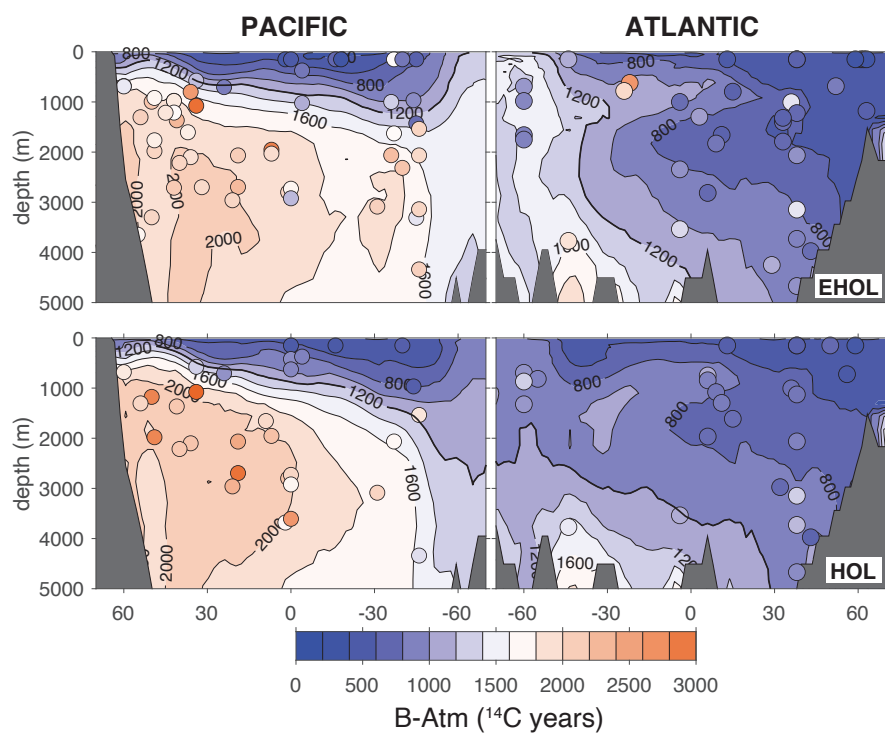

**Figure S1. Zonally averaged interpolated B-Atm radiocarbon age offsets for the HOL and EHOL (Pacific zonal averages at left, Atlantic at right). Filled circles and shading indicate input data and values.**
