# Supplementary material for: Rejuvenating the ocean: mean ocean radiocarbon, CO 2 release, and radiocarbon budget closure across the last deglaciation
Source: Copernicus journal article supplement (doi:10.5194/cp-2023-24), 2023-05-04
Supplement: Supplementary file 1 [file Skinner et al_Radiocarbon TS Data_ALL .xlsx]

## Sheet: Sheet1
Lat (N)	Long (E)	Water Depth	Calendar age	Estimated Error	Planktonic 14C age	Error	Benthic 14C age	Error	B-P*	Error*	C14atm	R-age	Error	B-atm	Error	GLODAP Age (from model)	Basin	Time slice	Site	Reference	FLAG	Sed rate (cm/kyr)	Notes	Include (y/n) key flags (baseline)	Include (y/n) (low sedimentation)	Include (y/n) Indian variant
42	-29	1756.5	12910	120	NaN	NaN	11860	60	NaN	NaN	11017	NaN	NaN	856	166	662	1	BA (12.8-14.8)	JFA17	Adkins et al. (1998)		NaN		1	1	1
42	-29	1756.5	13690	220	NaN	NaN	12120	60	NaN	NaN	11836	NaN	NaN	281	153	662	1	BA (12.8-14.8)	JFA2	Adkins et al. (1998)		NaN		1	1	1
38	-62	1954	15540	175	NaN	NaN	13980	40	NaN	NaN	12962	NaN	NaN	1004	133.5	677	1	HS1 (15-17.5)	JFA20.10 bottom	Adkins et al. (1998)		NaN		1	1	1
38	-62	1954	15440	175	NaN	NaN	14120	40	NaN	NaN	12912	NaN	NaN	1202	135.25	677	1	HS1 (15-17.5)	JFA20.10 top	Adkins et al. (1998)		NaN		1	1	1
38	-60	1784	15540	85	NaN	NaN	14060	40	NaN	NaN	12962	NaN	NaN	1089	78.75	671	1	HS1 (15-17.5)	JFA24.19 bottom	Adkins et al. (1998)		NaN		1	1	1
38	-60	1784	15490	85	NaN	NaN	14500	50	NaN	NaN	12931	NaN	NaN	1559	80.5	671	1	HS1 (15-17.5)	JFA24.19 middle	Adkins et al. (1998)		NaN		1	1	1
38	-60	1784	15440	85	NaN	NaN	14500	50	NaN	NaN	12912	NaN	NaN	1584	79.25	671	1	HS1 (15-17.5)	JFA24.19 top	Adkins et al. (1998)		NaN		1	1	1
38	-60	1784	15540	130	NaN	NaN	13850	40	NaN	NaN	12962	NaN	NaN	876	103.25	671	1	HS1 (15-17.5)	JFA24.8 bottom	Adkins et al. (1998)		NaN		1	1	1
38	-60	1784	15490	130	NaN	NaN	14470	50	NaN	NaN	12931	NaN	NaN	1526	106.5	671	1	HS1 (15-17.5)	JFA24.8 middle	Adkins et al. (1998)		NaN		1	1	1
38	-60	1784	15440	130	NaN	NaN	14520	40	NaN	NaN	12912	NaN	NaN	1603	102.75	671	1	HS1 (15-17.5)	JFA24.8 top	Adkins et al. (1998)		NaN		1	1	1
38	-60	1784	15400	200	NaN	NaN	14090	60	NaN	NaN	12902	NaN	NaN	1195	158.5	671	1	HS1 (15-17.5)	JFA24C	Adkins et al. (1998)		NaN		1	1	1
41.12	142.4	1366	2766	98	3290	80	4660	80	1370	113	2684	606	80	2005	138.5	2070	3	HOL (<6)	MR01-K03 PC4/5	Ahagon et al. (2003)		6.14606		1	1	1
41.12	142.4	1366	3983	251	4270	200	5970	80	1700	215	3671	599	200	2306	198.25	2070	3	HOL (<6)	MR01-K03 PC4/5	Ahagon et al. (2003)		10.0427		1	1	1
41.12	142.4	1366	5456	252	5450	220	6630	80	1180	234	4689.2	760.8	220	1902	220	2070	3	HOL (<6)	MR01-K03 PC4/5	Ahagon et al. (2003)		11.5469		1	1	1
41.12	142.4	1366	7634.5	209	7500	220	9020	80	1520	234	6797.4	702.6	220	2220	252.75	2070	3	EHOL (7-11)	MR01-K03 PC4/5	Ahagon et al. (2003)		13.2294		1	1	1
41.12	142.4	1366	11463	85	10600	50	11370	50	770	71	10010	590	50	1353	64.5	2070	3		MR01-K03 PC4/5	Ahagon et al. (2003)		20.1518		1	1	1
41.12	142.4	1366	11934	86	10900	55	11930	60	1030	81	10228	672	55	1679	85.75	2070	3	YD (11.8-12.7)	MR01-K03 PC4/5	Ahagon et al. (2003)		21.9541		1	1	1
41.12	142.4	1366	12631	51	11420	60	12600	50	1180	78	10606	814	60	2027	86.25	2070	3	YD (11.8-12.7)	MR01-K03 PC4/5	Ahagon et al. (2003)		23.0386		1	1	1
41.12	142.4	1366	13392	50	12230	50	13650	100	1420	112	11511	719	50	2127	112.75	2070	3	BA (12.8-14.8)	MR01-K03 PC4/5	Ahagon et al. (2003)		23.2228		1	1	1
41.12	142.4	1366	15151	107	13450	85	14250	120	800	147	12708	742	85	1542	149.25	2070	3	HS1 (15-17.5)	MR01-K03 PC4/5	Ahagon et al. (2003)		23.9588		1	1	1
41.12	142.4	1366	16073	69	14150	55	14830	60	680	81	13364	786	55	1469	81	2070	3	HS1 (15-17.5)	MR01-K03 PC4/5	Ahagon et al. (2003)		25.1975		1	1	1
41.12	142.4	1366	18793	107	16450	110	17650	100	1200	149	15471	979	110	2165	187.25	2070	3		MR01-K03 PC4/5	Ahagon et al. (2003)		28.7341		1	1	1
41.12	142.4	1366	20853	73	18200	65	19650	110	1450	128	17256	944	65	2384	146.5	2070	3	LGM (19-21.8)	MR01-K03 PC4/5	Ahagon et al. (2003)		30.7869		1	1	1
41.12	142.4	1366	24644	254	21500	220	22900	320	1400	388	20496	1004	220	2413	360.25	2070	3		MR01-K03 PC4/5	Ahagon et al. (2003)		34.2883		1	1	1
41.12	142.4	1366	26787	216	23560	220	24880	220	1320	311	22357	1203	220	2435	280.75	2070	3	preLGM (25-30)	MR01-K03 PC4/5	Ahagon et al. (2003)		35.3156		1	1	1
41.12	142.4	1366	28899	331	25700	300	27540	300	1840	424	24670	1030	300	2870	450.25	2070	3	preLGM (25-30)	MR01-K03 PC4/5	Ahagon et al. (2003)		37.4407		1	1	1
41.12	142.4	1366	33631	383	30130	360	30700	320	570	482	29033	1097	360	1606	468.75	2070	3		MR01-K03 PC4/5	Ahagon et al. (2003)		39.3684		1	1	1
7.2	112.2	2030	4689	111	4860	90	6420	100	1560	135	4132	728	90	2271	129	1978	3	HOL (<6)	V35-6	Andree et al. (1986)	Low sed rate <2cm/kyr	1.70612		0	1	0
7.2	112.2	2030	7971	114	7890	110	9210	130	1320	170	7161	729	110	2051	180.5	1978	3	EHOL (7-11)	V35-6	Andree et al. (1986)		4.64183		1	1	1
7.2	112.2	2030	9023	163	8780	120	9760	130	980	177	8134.8	645.2	120	1660	175.25	1978	3	EHOL (7-11)	V35-6	Andree et al. (1986)		4.98725		1	1	1
7.2	112.2	2030	9977	161	9550	120	10810	150	1260	192	8925.8	624.2	120	1937	180.5	1978	3	EHOL (7-11)	V35-6	Andree et al. (1986)		5.71314		1	1	1
7.2	112.2	2030	10783	171	10130	120	11290	150	1160	192	9554.8	575.2	120	1773	184.25	1978	3	EHOL (7-11)	V35-6	Andree et al. (1986)		6.30622		1	1	1
7.2	112.2	2030	12738	130	11590	140	12950	160	1360	213	10775	815	140	2173	237.25	1978	3		V35-6	Andree et al. (1986)		6.98697		1	1	1
7.2	112.2	2030	13708	195	12540	160	13550	170	1010	233	11822	718	160	1694	249.25	1978	3	BA (12.8-14.8)	V35-6	Andree et al. (1986)		7.14911	Delta-R from Wan and Jian (2014)	1	1	1
7.195	112.077	1953	1293	479	2055	100	3610	100	1555	141	1365	690	100	2186	466	1950	3	HOL (<6)	V35-5	Andree et al. (1986); Broecker et al. (1988b)		7.73395		1	1	1
7.195	112.077	1953	5793	428	5830	110	7110	120	1280	163	5081.2	748.8	110	2041	388	1950	3	HOL (<6)	V35-5	Andree et al. (1986); Broecker et al. (1988b)		10.3573		1	1	1
7.195	112.077	1953	7626.5	288	7500	150	8870	160	1370	219	6801	699	150	2082	349.75	1950	3	EHOL (7-11)	V35-5	Andree et al. (1986); Broecker et al. (1988b)		11.1453		1	1	1
7.195	112.077	1953	8210	267	8190	140	10930	190	2740	236	7439	751	140	3519	330.5	1950	3	EHOL (7-11)	V35-5	Andree et al. (1986); Broecker et al. (1988b)		10.9622		1	1	1
7.195	112.077	1953	9331.5	217	9050	160	10910	180	1860	241	8348.5	701.5	160	2574	269	1950	3	EHOL (7-11)	V35-5	Andree et al. (1986); Broecker et al. (1988b)		11.788		1	1	1
7.195	112.077	1953	9995.5	372	9520	150	11690	130	2170	198	8875.6	644.4	150	2794	328.75	1950	3	EHOL (7-11)	V35-5	Andree et al. (1986); Broecker et al. (1988b)		12.0054		1	1	1
7.195	112.077	1953	12627	426	11580	200	12620	190	1040	276	10600	980	200	1959	417	1950	3		V35-5	Andree et al. (1986); Broecker et al. (1988b)		11.8793		1	1	1
7.195	112.077	1953	15477	341	13740	190	16330	250	2590	314	12926	814	190	3382	341.25	1950	3	HS1 (15-17.5)	V35-5	Andree et al. (1986); Broecker et al. (1988b)		13.5685		1	1	1
7.195	112.077	1953	16986	450	14990	420	17010	230	2020	479	13932	1058	420	3017	386.5	1950	3	HS1 (15-17.5)	V35-5	Andree et al. (1986); Broecker et al. (1988b)		14.1293		1	1	1
7.195	112.077	1953	18419	373	16170	290	17810	350	1640	455	15239	931	290	2673	501.25	1950	3		V35-5	Andree et al. (1986); Broecker et al. (1988b)		14.6588		1	1	1
7.195	112.077	1953	19669.5	339	17540	260	19280	290	1740	389	16385	1155	260	2967	393.75	1950	3	LGM (19-21.8)	V35-5	Andree et al. (1986); Broecker et al. (1988b)		15.252	Delta-R from Wan and Jian (2014); Samples with negative B-P values excluded	1	1	1
7.195	112.077	1953	20268	435	17020	390	19040	460	2020	603	16751	269	390	2247	574.75	1950	3	LGM (19-21.8)	V35-5	Andree et al. (1986); Broecker et al. (1988b)		15.6898		1	1	1
57.5	-8.4	150	11775.5	68.165	10664	65	NaN	NaN	NaN	NaN	10146	518	65	528	82.25	443	1	YD (11.8-12.7)	MD95-2007	Austin et al., 2011		389.144	radcal, inctcal13, cal age interpolated	1	1	1
57.5	-8.4	150	12429.5	105.826	11353	62	NaN	NaN	NaN	NaN	10362	991	62	935	95.5	443	1	YD (11.8-12.7)	MD95-2007	Austin et al., 2011		398.104	radcal, inctcal13, cal age interpolated	1	1	1
57.5	-8.4	150	12482.2	103.763	11299	66	NaN	NaN	NaN	NaN	10473	826	66	844	106.5	443	1	YD (11.8-12.7)	MD95-2007	Austin et al., 2011		411.552	radcal, inctcal13, cal age interpolated	1	1	1
57.5	-8.4	150	12551.5	103.762	11500	90	NaN	NaN	NaN	NaN	10477	1023	90	988	145.5	443	1	YD (11.8-12.7)	MD95-2007	Austin et al., 2011		393.258	radcal, inctcal13, cal age interpolated	1	1	1
57.5	-8.4	150	12596	98.0994	11296	77	NaN	NaN	NaN	NaN	10504	792	77	747	153.25	443	1	YD (11.8-12.7)	MD95-2007	Austin et al., 2011		302.187	radcal, inctcal13, cal age interpolated	1	1	1
57.5	-8.4	150	12973.2	71.0856	11471	62	NaN	NaN	NaN	NaN	11048	423	62	427	85.5	443	1	BA (12.8-14.8)	MD95-2007	Austin et al., 2011		328.816	radcal, inctcal13, cal age interpolated	1	1	1
57.5	-8.4	150	13535.9	139.985	12353	74	NaN	NaN	NaN	NaN	11749	604	74	660	163.5	443	1	BA (12.8-14.8)	MD95-2007	Austin et al., 2011		413.962	radcal, inctcal13, cal age interpolated	1	1	1
57.5	-8.4	150	13740	137.588	12630	100	NaN	NaN	NaN	NaN	11824	806	100	747	162.75	443	1	BA (12.8-14.8)	MD95-2007	Austin et al., 2011		385.214	radcal, inctcal13, cal age interpolated	1	1	1
57.5	-8.4	150	14125.5	121.497	12790	120	NaN	NaN	NaN	NaN	12250	540	120	565	163.5	443	1	BA (12.8-14.8)	MD95-2007	Austin et al., 2011		385.214	radcal, inctcal13, cal age interpolated	1	1	1
13.2	-59.5	150	13100	40	NaN	NaN	11670	50	NaN	NaN	11190	NaN	NaN	497	90.5	331	1	BA (12.8-14.8)	RGF 12.16.5#* Barbados	Bard et al. 1990, 1998		NaN	R-age by Radcal	1	1	1
13.2	-59.5	150	13725	50	NaN	NaN	12120	200	NaN	NaN	11800	NaN	NaN	269	204.5	331	1	BA (12.8-14.8)	RGF 12.21.10# Barbados	Bard et al. 1990, 1998		NaN	R-age by Radcal	1	1	1
13.2	-59.5	150	13680	85	NaN	NaN	12110	100	NaN	NaN	11840	NaN	NaN	283	132.25	331	1	BA (12.8-14.8)	RGF 12.21.6 Barbados	Bard et al. 1990, 1998		NaN	R-age by Radcal	1	1	1
13.2	-59.5	150	30165	80	NaN	NaN	26270	205	NaN	NaN	25998	NaN	NaN	289	242	331	1		RGF 12.30.2# Barbados	Bard et al. 1990, 1998		NaN	R-age by Radcal	1	1	1
13.2	-59.5	150	11570	30	NaN	NaN	10380	85	NaN	NaN	10027	NaN	NaN	349	87	331	1		RGF 12.5.2* Barbados	Bard et al. 1990, 1998		NaN	R-age by Radcal	1	1	1
13.2	-59.5	150	11510	35	NaN	NaN	10495	80	NaN	NaN	10057	NaN	NaN	462	82.25	331	1		RGF 12.6.7* Barbados	Bard et al. 1990, 1998		NaN	R-age by Radcal	1	1	1
13.2	-59.5	150	12245	45	NaN	NaN	10620	65	NaN	NaN	10357	NaN	NaN	231	68.75	331	1	YD (11.8-12.7)	RGF 12.9.5* Barbados	Bard et al. 1990, 1998		NaN	R-age by Radcal	1	1	1
13.2	-59.5	150	9250	30	NaN	NaN	8705	60	NaN	NaN	8224	NaN	NaN	462	69.5	331	1	EHOL (7-11)	RGF 7.12.2#* Barbados	Bard et al. 1990, 1998		NaN	R-age by Radcal	1	1	1
13.2	-59.5	150	9720	25	NaN	NaN	9150	85	NaN	NaN	8767	NaN	NaN	388	87.75	331	1	EHOL (7-11)	RGF 7.16.2* Barbados	Bard et al. 1990, 1998		NaN	R-age by Radcal	1	1	1
13.2	-59.5	150	11075	35	NaN	NaN	10110	105	NaN	NaN	9614	NaN	NaN	507	112.5	331	1		RGF 7.27.4 Barbados	Bard et al. 1990, 1998		NaN	R-age by Radcal	1	1	1
13.2	-59.5	150	7445	40	NaN	NaN	7005	75	NaN	NaN	6579	NaN	NaN	458	101	331	1	EHOL (7-11)	RGF 7.4.2 Barbados	Bard et al. 1990, 1998		NaN	R-age by Radcal	1	1	1
13.2	-59.5	150	8435	25	NaN	NaN	8040	80	NaN	NaN	7690	NaN	NaN	362	89.25	331	1	EHOL (7-11)	RGF 7.5.5 Barbados	Bard et al. 1990, 1998		NaN	R-age by Radcal	1	1	1
13.2	-59.5	150	14665	45	NaN	NaN	13020	110	NaN	NaN	12479	NaN	NaN	561	117.25	331	1	BA (12.8-14.8)	RGF 9.13.3#* Barbados	Bard et al. 1990, 1998		NaN	R-age by Radcal	1	1	1
13.2	-59.5	150	18210	70	NaN	NaN	15570	90	NaN	NaN	14859	NaN	NaN	692	172.25	331	1		RGF 9.21.11 Barbados	Bard et al. 1990, 1998		NaN	R-age by Radcal	1	1	1
13.2	-59.5	150	18860	125	NaN	NaN	16420	210	NaN	NaN	15589	NaN	NaN	838	266.25	331	1		RGF 9.24.4 Barbados	Bard et al. 1990, 1998		NaN	R-age by Radcal	1	1	1
13.2	-59.5	150	18970	35	NaN	NaN	16760	110	NaN	NaN	15736	NaN	NaN	1026	117.5	331	1	LGM (19-21.8)	RGF 9.27.5#* Barbados	Bard et al. 1990, 1998		NaN	R-age by Radcal	1	1	1
13.2	-59.5	150	20570	60	NaN	NaN	17630	140	NaN	NaN	17077	NaN	NaN	566	156.25	331	1	LGM (19-21.8)	RGF 9.32.4 Barbados	Bard et al. 1990, 1998		NaN	R-age by Radcal	1	1	1
13.2	-59.5	150	21935	65	NaN	NaN	18810	125	NaN	NaN	17974	NaN	NaN	829	141.5	331	1		RGF 9.34.8#* Barbados	Bard et al. 1990, 1998		NaN	R-age by Radcal	1	1	1
13.2	-59.5	150	14210	50	NaN	NaN	12600	100	NaN	NaN	12308	NaN	NaN	298	105.25	331	1	BA (12.8-14.8)	RGF 9.8.2 Barbados	Bard et al. 1990, 1998		NaN	R-age by Radcal	1	1	1
13.2	-59.5	150	770	5	NaN	NaN	1360	45	NaN	NaN	868	NaN	NaN	488	45.5	331	1	HOL (<6)	RGF B.56#* Barbados	Bard et al. 1990, 1998		NaN	R-age by Radcal	1	1	1
-21.8	-138.9	150	17680	45	NaN	NaN	15135	75	NaN	NaN	14460	NaN	NaN	669	85.25	542	4		Mu 313#* Mururoa	Bard et al. 1998		NaN	R-age by Radcal	1	1	1
-21.8	-138.9	150	15675	40	NaN	NaN	13460	70	NaN	NaN	13078	NaN	NaN	383	84	542	4	HS1 (15-17.5)	Mu 315#* Mururoa	Bard et al. 1998		NaN	R-age by Radcal	1	1	1
-21.8	-138.9	150	23630	80	NaN	NaN	20350	150	NaN	NaN	19411	NaN	NaN	867	180.25	542	4		Mu 8/30 310. Mururoa	Bard et al. 1998		NaN	R-age by Radcal	1	1	1
-21.8	-138.9	150	17245	30	NaN	NaN	14790	60	NaN	NaN	14148	NaN	NaN	636	75.75	542	4	HS1 (15-17.5)	Mu 8/30 315 Mururoa	Bard et al. 1998		NaN	R-age by Radcal	1	1	1
-17.6	-149.4	150	13577	12	NaN	NaN	12169	29	NaN	NaN	11689	NaN	NaN	473	49.75	530	4	BA (12.8-14.8)	310-M0015A-33R-1W 29-40 Tahiti2	Bard et al. 1998, Durand et al. 2013		NaN	R-age by Radcal	1	1	1
-17.6	-149.4	150	14418	13	NaN	NaN	12925	45	NaN	NaN	12397	NaN	NaN	527	50	530	4	BA (12.8-14.8)	310-M0015A-36R-1W 51-52 Tahiti2	Bard et al. 1998, Durand et al. 2013		NaN	R-age by Radcal	1	1	1
-17.6	-149.4	150	14516	10	NaN	NaN	12915	50	NaN	NaN	12428	NaN	NaN	486	56.25	530	4	BA (12.8-14.8)	310-M0015A-36R-2W 0-6 Tahiti2	Bard et al. 1998, Durand et al. 2013		NaN	R-age by Radcal	1	1	1
-17.6	-149.4	150	14650	11	NaN	NaN	12798	28	NaN	NaN	12480	NaN	NaN	318	38.5	530	4	BA (12.8-14.8)	310-M0015A-37R-1W 19-28 Tahiti2	Bard et al. 1998, Durand et al. 2013		NaN	R-age by Radcal	1	1	1
-17.6	-149.4	150	14555	12	NaN	NaN	12801	30	NaN	NaN	12447	NaN	NaN	353	41.5	530	4	BA (12.8-14.8)	310-M0016A-36R-2W 5-10 Tahiti2	Bard et al. 1998, Durand et al. 2013		NaN	R-age by Radcal	1	1	1
-17.6	-149.4	150	14273	32	NaN	NaN	12783	32	NaN	NaN	12328	NaN	NaN	451	51.25	530	4	BA (12.8-14.8)	310-M0018A-18R-1W 40-50 Tahiti2	Bard et al. 1998, Durand et al. 2013		NaN	R-age by Radcal	1	1	1
-17.6	-149.4	150	14338	14	NaN	NaN	12845	40	NaN	NaN	12384	NaN	NaN	461	52	530	4	BA (12.8-14.8)	310-M0018A-19R-1W 107-110 Tahiti2	Bard et al. 1998, Durand et al. 2013		NaN	R-age by Radcal	1	1	1
-17.6	-149.4	150	11488	14	NaN	NaN	10280	35	NaN	NaN	10018	NaN	NaN	255	42.25	530	4		310-M0018A-7R-1W 73-82 Tahiti2	Bard et al. 1998, Durand et al. 2013		NaN	R-age by Radcal	1	1	1
-17.6	-149.4	150	13724	29	NaN	NaN	11995	40	NaN	NaN	11800	NaN	NaN	165	53.25	530	4	BA (12.8-14.8)	310-M0020A-16R-1W 55-66 Tahiti2	Bard et al. 1998, Durand et al. 2013		NaN	R-age by Radcal	1	1	1
-17.6	-149.4	150	14145	23	NaN	NaN	12530	40	NaN	NaN	12258	NaN	NaN	268	47.25	530	4	BA (12.8-14.8)	310-M0020A-21R-2W 13-20 Tahiti2	Bard et al. 1998, Durand et al. 2013		NaN	R-age by Radcal	1	1	1
-17.6	-149.4	150	14456	30	NaN	NaN	12892	31	NaN	NaN	12405	NaN	NaN	484	40.5	530	4	BA (12.8-14.8)	310-M0020A-23R-1W 56-64 Tahiti2	Bard et al. 1998, Durand et al. 2013		NaN	R-age by Radcal	1	1	1
-17.6	-149.4	150	14734	29	NaN	NaN	12815	50	NaN	NaN	12383	NaN	NaN	417	72.25	530	4	BA (12.8-14.8)	310-M0020A-23R-2W 72-78 Tahiti2	Bard et al. 1998, Durand et al. 2013		NaN	R-age by Radcal	1	1	1
-17.6	-149.4	150	14663	31	NaN	NaN	12655	40	NaN	NaN	12479	NaN	NaN	185	55.75	530	4	BA (12.8-14.8)	310-M0020A-24R-2W 38-42 Tahiti2	Bard et al. 1998, Durand et al. 2013		NaN	R-age by Radcal	1	1	1
-17.6	-149.4	150	14015	14	NaN	NaN	12320	50	NaN	NaN	12055	NaN	NaN	261	65.25	530	4	BA (12.8-14.8)	310-M0021A-13R-2W 66-75 Tahiti2	Bard et al. 1998, Durand et al. 2013		NaN	R-age by Radcal	1	1	1
-17.6	-149.4	150	14350	11	NaN	NaN	12975	50	NaN	NaN	12393	NaN	NaN	582	55.75	530	4	BA (12.8-14.8)	310-M0021B-16R-1W 39-44 Tahiti2	Bard et al. 1998, Durand et al. 2013		NaN	R-age by Radcal	1	1	1
-17.6	-149.4	150	13460	11	NaN	NaN	11930	40	NaN	NaN	11584	NaN	NaN	347	50.5	530	4	BA (12.8-14.8)	310-M0023A-11R-1W 22-31 Tahiti2	Bard et al. 1998, Durand et al. 2013		NaN	R-age by Radcal	1	1	1
-17.6	-149.4	150	13736	9	NaN	NaN	12490	40	NaN	NaN	11814	NaN	NaN	671	48	530	4	BA (12.8-14.8)	310-M0023A-12R-1W 140-144 Tahiti2	Bard et al. 1998, Durand et al. 2013		NaN	R-age by Radcal	1	1	1
-17.6	-149.4	150	13580	10	NaN	NaN	12125	28	NaN	NaN	11701	NaN	NaN	423	48	530	4	BA (12.8-14.8)	310-M0023A-12R-1W 32-38 Tahiti2	Bard et al. 1998, Durand et al. 2013		NaN	R-age by Radcal	1	1	1
-17.6	-149.4	150	14312	19	NaN	NaN	12885	50	NaN	NaN	12355	NaN	NaN	526	67.75	530	4	BA (12.8-14.8)	310-M0023A-13R-2W 32-37 Tahiti2	Bard et al. 1998, Durand et al. 2013		NaN	R-age by Radcal	1	1	1
-17.6	-149.4	150	14588	12	NaN	NaN	12750	40	NaN	NaN	12462	NaN	NaN	287	48.5	530	4	BA (12.8-14.8)	310-M0023A-14R-1W 0-20 Tahiti2	Bard et al. 1998, Durand et al. 2013		NaN	R-age by Radcal	1	1	1
-17.6	-149.4	150	12370	18	NaN	NaN	10695	35	NaN	NaN	10369	NaN	NaN	319	41.75	530	4	YD (11.8-12.7)	310-M0023A-5R-1W 45-52 Tahiti2	Bard et al. 1998, Durand et al. 2013		NaN	R-age by Radcal	1	1	1
-17.6	-149.4	150	13988	8	NaN	NaN	12575	35	NaN	NaN	12014	NaN	NaN	558	51.75	530	4	BA (12.8-14.8)	310-M0023B-12R-1W 30-33 Tahiti2	Bard et al. 1998, Durand et al. 2013		NaN	R-age by Radcal	1	1	1
-17.6	-149.4	150	14278	7	NaN	NaN	12800	35	NaN	NaN	12329	NaN	NaN	469	53	530	4	BA (12.8-14.8)	310-M0023B-12R-2W 113-127 Tahiti2	Bard et al. 1998, Durand et al. 2013		NaN	R-age by Radcal	1	1	1
-17.6	-149.4	150	14284	13	NaN	NaN	12939	38	NaN	NaN	12332	NaN	NaN	605	57.75	530	4	BA (12.8-14.8)	310-M0023B-15R-1W 0-5 Tahiti2	Bard et al. 1998, Durand et al. 2013		NaN	R-age by Radcal	1	1	1
-17.6	-149.4	150	14582	26	NaN	NaN	12730	50	NaN	NaN	12459	NaN	NaN	270	57.5	530	4	BA (12.8-14.8)	310-M0024A-10R-1W 65-75 Tahiti2	Bard et al. 1998, Durand et al. 2013		NaN	R-age by Radcal	1	1	1
-17.6	-149.4	150	14609	13	NaN	NaN	12920	70	NaN	NaN	12470	NaN	NaN	450	74	530	4	BA (12.8-14.8)	310-M0024A-10R-1W 98-116 Tahiti2	Bard et al. 1998, Durand et al. 2013		NaN	R-age by Radcal	1	1	1
-17.6	-149.4	150	14748	13	NaN	NaN	12902	31	NaN	NaN	12367	NaN	NaN	529	51	530	4	BA (12.8-14.8)	310-M0024A-10R-2W 69-72 Tahiti2	Bard et al. 1998, Durand et al. 2013		NaN	R-age by Radcal	1	1	1
-17.6	-149.4	150	14994	13	NaN	NaN	13025	40	NaN	NaN	12590	NaN	NaN	435	55.5	530	4	HS1 (15-17.5)	310-M0024A-11R-2W 23-38 Tahiti2	Bard et al. 1998, Durand et al. 2013		NaN	R-age by Radcal	1	1	1
-17.6	-149.4	150	15147	16	NaN	NaN	13116	31	NaN	NaN	12704	NaN	NaN	411	50	530	4	HS1 (15-17.5)	310-M0024A-13R-1W 32-41 Tahiti2	Bard et al. 1998, Durand et al. 2013		NaN	R-age by Radcal	1	1	1
-17.6	-149.4	150	15232	16	NaN	NaN	13385	45	NaN	NaN	12768	NaN	NaN	616	58.5	530	4	HS1 (15-17.5)	310-M0024A-14R-1W 24-28 Tahiti2	Bard et al. 1998, Durand et al. 2013		NaN	R-age by Radcal	1	1	1
-17.6	-149.4	150	15744	15	NaN	NaN	13700	40	NaN	NaN	13130	NaN	NaN	568	58	530	4	HS1 (15-17.5)	310-M0024A-15R-1W 16-20 Tahiti2	Bard et al. 1998, Durand et al. 2013		NaN	R-age by Radcal	1	1	1
-17.6	-149.4	150	14478	12	NaN	NaN	12893	29	NaN	NaN	12413	NaN	NaN	479	38.75	530	4	BA (12.8-14.8)	310-M0025A-10R-1W 40-46 Tahiti2	Bard et al. 1998, Durand et al. 2013		NaN	R-age by Radcal	1	1	1
-17.6	-149.4	150	14901	11	NaN	NaN	12910	60	NaN	NaN	12510	NaN	NaN	398	65.5	530	4		310-M0025B-10R-1W 0-5 Tahiti2	Bard et al. 1998, Durand et al. 2013		NaN	R-age by Radcal	1	1	1
-17.6	-149.4	150	15310	11	NaN	NaN	13410	60	NaN	NaN	12846	NaN	NaN	563	73	530	4	HS1 (15-17.5)	310-M0025B-11R-1W 70-74 Tahiti2	Bard et al. 1998, Durand et al. 2013		NaN	R-age by Radcal	1	1	1
-17.6	-149.4	150	14801	16	NaN	NaN	13009	18	NaN	NaN	12416	NaN	NaN	591	53	530	4	BA (12.8-14.8)	310-M0025B-9R-2W 60-70 Tahiti2	Bard et al. 1998, Durand et al. 2013		NaN	R-age by Radcal	1	1	1
-17.6	-149.4	150	14853	15	NaN	NaN	13080	80	NaN	NaN	12489	NaN	NaN	592	85.75	530	4		310-M0026A-5R-1W 117-127 Tahiti2	Bard et al. 1998, Durand et al. 2013		NaN	R-age by Radcal	1	1	1
-17.6	-149.4	150	14720	12	NaN	NaN	12935	45	NaN	NaN	12408	NaN	NaN	526	68	530	4	BA (12.8-14.8)	310-M0026A-5R-1W 4-18 Tahiti2	Bard et al. 1998, Durand et al. 2013		NaN	R-age by Radcal	1	1	1
-17.6	-149.4	150	11033	8	NaN	NaN	9885	35	NaN	NaN	9562.8	NaN	NaN	320	42	530	4		310-M005A-12R-1W 51-54 Tahiti2	Bard et al. 1998, Durand et al. 2013		NaN	R-age by Radcal	1	1	1
-17.6	-149.4	150	11837	7	NaN	NaN	10370	35	NaN	NaN	10204	NaN	NaN	169	43	530	4	YD (11.8-12.7)	310-M005C-11R-1W 46-59 Tahiti2	Bard et al. 1998, Durand et al. 2013		NaN	R-age by Radcal	1	1	1
-17.6	-149.4	150	12430	14	NaN	NaN	10780	35	NaN	NaN	10363	NaN	NaN	418	42.75	530	4	YD (11.8-12.7)	310-M005D-2R-1W 107-115 Tahiti2	Bard et al. 1998, Durand et al. 2013		NaN	R-age by Radcal	1	1	1
-17.6	-149.4	150	13163	22	NaN	NaN	11545	35	NaN	NaN	11264	NaN	NaN	268	58.75	530	4	BA (12.8-14.8)	310-M005D-5R-2W 0-5 Tahiti2	Bard et al. 1998, Durand et al. 2013		NaN	R-age by Radcal	1	1	1
-17.6	-149.4	150	13784	15	NaN	NaN	12230	40	NaN	NaN	11899	NaN	NaN	317	61.75	530	4	BA (12.8-14.8)	310-M005D-6R-2W 0-5 Tahiti2	Bard et al. 1998, Durand et al. 2013		NaN	R-age by Radcal	1	1	1
-17.6	-149.4	150	10029	9	NaN	NaN	9175	30	NaN	NaN	8884.4	NaN	NaN	283	36.75	530	4	EHOL (7-11)	310-M007A-18R-1W 76-90 Tahiti2	Bard et al. 1998, Durand et al. 2013		NaN	R-age by Radcal	1	1	1
-17.6	-149.4	150	14239	17	NaN	NaN	12550	60	NaN	NaN	12320	NaN	NaN	230	63.25	530	4	BA (12.8-14.8)	310-M009A-6R-1W 38-48 Tahiti2	Bard et al. 1998, Durand et al. 2013		NaN	R-age by Radcal	1	1	1
-17.6	-149.4	150	14519	10	NaN	NaN	12930	50	NaN	NaN	12430	NaN	NaN	499	56.25	530	4	BA (12.8-14.8)	310-M009B-13R-1W 11-18 Tahiti2	Bard et al. 1998, Durand et al. 2013		NaN	R-age by Radcal	1	1	1
-17.6	-149.4	150	15146	12	NaN	NaN	13160	50	NaN	NaN	12703	NaN	NaN	456	62.5	530	4	HS1 (15-17.5)	310-M009B-14R-1W 22-25 Tahiti2	Bard et al. 1998, Durand et al. 2013		NaN	R-age by Radcal	1	1	1
-17.6	-149.4	150	16087	21	NaN	NaN	13880	50	NaN	NaN	13372	NaN	NaN	508	60.25	530	4	HS1 (15-17.5)	310-M009B-15R-1W 13-20 Tahiti2	Bard et al. 1998, Durand et al. 2013		NaN	R-age by Radcal	1	1	1
-17.6	-149.4	150	29631	31	NaN	NaN	25970	100	NaN	NaN	25293	NaN	NaN	675	114.25	530	4	preLGM (25-30)	310-M009B-16R-2W 13-17 Tahiti2	Bard et al. 1998, Durand et al. 2013		NaN	R-age by Radcal	1	1	1
-17.6	-149.4	150	14348	11	NaN	NaN	12632	31	NaN	NaN	12392	NaN	NaN	240	41	530	4	BA (12.8-14.8)	310-M009B-9R-2W 0-5 Tahiti2	Bard et al. 1998, Durand et al. 2013		NaN	R-age by Radcal	1	1	1
-17.6	-149.4	150	15512	13	NaN	NaN	13610	50	NaN	NaN	12943	NaN	NaN	665	65.75	530	4	HS1 (15-17.5)	310-M009C-17R-2W 0-10 Tahiti2	Bard et al. 1998, Durand et al. 2013		NaN	R-age by Radcal	1	1	1
-17.6	-149.4	150	13848	15	NaN	NaN	12300	50	NaN	NaN	12013	NaN	NaN	279	56	530	4	BA (12.8-14.8)	310-M009C-6R-1W 38-43 Tahiti2	Bard et al. 1998, Durand et al. 2013		NaN	R-age by Radcal	1	1	1
-17.6	-149.4	150	14793	13	NaN	NaN	13038	31	NaN	NaN	12402	NaN	NaN	634	56.5	530	4	BA (12.8-14.8)	310-M009D-10R-2W 96-107 Tahiti2	Bard et al. 1998, Durand et al. 2013		NaN	R-age by Radcal	1	1	1
-17.6	-149.4	150	14912	13	NaN	NaN	12985	40	NaN	NaN	12515	NaN	NaN	468	49.75	530	4		310-M009D-11R-1W 13-20 Tahiti2	Bard et al. 1998, Durand et al. 2013		NaN	R-age by Radcal	1	1	1
-17.6	-149.4	150	29209	25	NaN	NaN	25530	110	NaN	NaN	25053	NaN	NaN	474	149	530	4	preLGM (25-30)	310-M009D-14R-2W 81-90 Tahiti2	Bard et al. 1998, Durand et al. 2013		NaN	R-age by Radcal	1	1	1
-17.6	-149.4	150	30195	28	NaN	NaN	26050	100	NaN	NaN	26026	NaN	NaN	24	122.25	530	4		310-M009D-18R-1W 19-28 Tahiti2	Bard et al. 1998, Durand et al. 2013		NaN	R-age by Radcal	1	1	1
-17.6	-149.4	150	14221	28	NaN	NaN	12680	40	NaN	NaN	12312	NaN	NaN	369	47.25	530	4	BA (12.8-14.8)	310-M009D-7R-1W 11-28 Tahiti2	Bard et al. 1998, Durand et al. 2013		NaN	R-age by Radcal	1	1	1
-17.6	-149.4	150	14490	17	NaN	NaN	12840	50	NaN	NaN	12417	NaN	NaN	421	56	530	4	BA (12.8-14.8)	310-M009D-9R-1W 66-77 Tahiti2	Bard et al. 1998, Durand et al. 2013		NaN	R-age by Radcal	1	1	1
-17.6	-149.4	150	14531	23	NaN	NaN	12950	45	NaN	NaN	12435	NaN	NaN	513	53.25	530	4	BA (12.8-14.8)	310-M009D-9R-1W 99-103 Tahiti2	Bard et al. 1998, Durand et al. 2013		NaN	R-age by Radcal	1	1	1
-17.6	-149.4	150	14116	21	NaN	NaN	12585	50	NaN	NaN	12246	NaN	NaN	344	57.25	530	4	BA (12.8-14.8)	310-M009E-7R-1W 5-13 Tahiti2	Bard et al. 1998, Durand et al. 2013		NaN	R-age by Radcal	1	1	1
-17.6	-149.4	150	14359	20	NaN	NaN	12845	40	NaN	NaN	12397	NaN	NaN	451	47.75	530	4	BA (12.8-14.8)	310-M009E-9R-1W 32-36 Tahiti2	Bard et al. 1998, Durand et al. 2013		NaN	R-age by Radcal	1	1	1
-17.6	-149.4	150	14769	19	NaN	NaN	12775	40	NaN	NaN	12369	NaN	NaN	396	58.25	530	4	BA (12.8-14.8)	310-M009E-9R-1W 69-73 Tahiti2	Bard et al. 1998, Durand et al. 2013		NaN	R-age by Radcal	1	1	1
-17.6	-149.4	150	9625	10	NaN	NaN	8710	70	NaN	NaN	8701	NaN	NaN	6	72	530	4	EHOL (7-11)	Ta-P6-10# Tahiti1	Bard et al. 1998, Durand et al. 2013		NaN	R-age by Radcal	1	1	1
-17.6	-149.4	150	9890	20	NaN	NaN	9090	60	NaN	NaN	8805	NaN	NaN	271	70.25	530	4	EHOL (7-11)	Ta-P6-11# Tahiti1	Bard et al. 1998, Durand et al. 2013		NaN	R-age by Radcal	1	1	1
-17.6	-149.4	150	9980	25	NaN	NaN	9100	60	NaN	NaN	8921	NaN	NaN	204	64.75	530	4	EHOL (7-11)	Ta-P6-12 Tahiti1	Bard et al. 1998, Durand et al. 2013		NaN	R-age by Radcal	1	1	1
-17.6	-149.4	150	10260	20	NaN	NaN	9290	60	NaN	NaN	9173	NaN	NaN	136	75.5	530	4	EHOL (7-11)	Ta-P6-13# Tahiti1	Bard et al. 1998, Durand et al. 2013		NaN	R-age by Radcal	1	1	1
-17.6	-149.4	150	10180	35	NaN	NaN	9365	50	NaN	NaN	8959	NaN	NaN	398	82.75	530	4	EHOL (7-11)	Ta-P6-14* Tahiti1	Bard et al. 1998, Durand et al. 2013		NaN	R-age by Radcal	1	1	1
-17.6	-149.4	150	8570	15	NaN	NaN	8130	100	NaN	NaN	7782	NaN	NaN	345	101.5	530	4	EHOL (7-11)	Ta-P7-1# Tahiti1	Bard et al. 1998, Durand et al. 2013		NaN	R-age by Radcal	1	1	1
-17.6	-149.4	150	12005	30	NaN	NaN	10580	70	NaN	NaN	10320	NaN	NaN	273	73	530	4	YD (11.8-12.7)	Ta-P7-10 Tahiti1	Bard et al. 1998, Durand et al. 2013		NaN	R-age by Radcal	1	1	1
-17.6	-149.4	150	12950	25	NaN	NaN	11230	45	NaN	NaN	11037	NaN	NaN	189	49.75	530	4	BA (12.8-14.8)	Ta-P7-11 Tahiti1	Bard et al. 1998, Durand et al. 2013		NaN	R-age by Radcal	1	1	1
-17.6	-149.4	150	12875	25	NaN	NaN	11130	45	NaN	NaN	10961	NaN	NaN	150	53.75	530	4	BA (12.8-14.8)	Ta-P7-12 Tahiti1	Bard et al. 1998, Durand et al. 2013		NaN	R-age by Radcal	1	1	1
-17.6	-149.4	150	12775	40	NaN	NaN	11310	80	NaN	NaN	10912	NaN	NaN	435	116.5	530	4	BA (12.8-14.8)	Ta-P7-13 Tahiti1	Bard et al. 1998, Durand et al. 2013		NaN	R-age by Radcal	1	1	1
-17.6	-149.4	150	12785	30	NaN	NaN	11390	80	NaN	NaN	10913	NaN	NaN	494	97.75	530	4	BA (12.8-14.8)	Ta-P7-14 Tahiti1	Bard et al. 1998, Durand et al. 2013		NaN	R-age by Radcal	1	1	1
-17.6	-149.4	150	12945	30	NaN	NaN	11330	80	NaN	NaN	11041	NaN	NaN	293	82.5	530	4	BA (12.8-14.8)	Ta-P7-15 Tahiti1	Bard et al. 1998, Durand et al. 2013		NaN	R-age by Radcal	1	1	1
-17.6	-149.4	150	12980	30	NaN	NaN	11390	80	NaN	NaN	11047	NaN	NaN	340	81.25	530	4	BA (12.8-14.8)	Ta-P7-16 Tahiti1	Bard et al. 1998, Durand et al. 2013		NaN	R-age by Radcal	1	1	1
-17.6	-149.4	150	13145	25	NaN	NaN	11730	100	NaN	NaN	11230	NaN	NaN	476	109	530	4	BA (12.8-14.8)	Ta-P7-17 Tahiti1	Bard et al. 1998, Durand et al. 2013		NaN	R-age by Radcal	1	1	1
-17.6	-149.4	150	13540	25	NaN	NaN	11930	110	NaN	NaN	11741	NaN	NaN	223	116.5	530	4	BA (12.8-14.8)	Ta-P7-18# Tahiti1	Bard et al. 1998, Durand et al. 2013		NaN	R-age by Radcal	1	1	1
-17.6	-149.4	150	13830	20	NaN	NaN	12090	110	NaN	NaN	12018	NaN	NaN	77	112.75	530	4	BA (12.8-14.8)	Ta-P7-19# Tahiti1	Bard et al. 1998, Durand et al. 2013		NaN	R-age by Radcal	1	1	1
-17.6	-149.4	150	9310	20	NaN	NaN	8470	90	NaN	NaN	8314	NaN	NaN	156	94.75	530	4	EHOL (7-11)	Ta-P7-2# Tahiti1	Bard et al. 1998, Durand et al. 2013		NaN	R-age by Radcal	1	1	1
-17.6	-149.4	150	10315	25	NaN	NaN	9270	70	NaN	NaN	9213	NaN	NaN	70	73	530	4	EHOL (7-11)	Ta-P7-4 Tahiti1	Bard et al. 1998, Durand et al. 2013		NaN	R-age by Radcal	1	1	1
-17.6	-149.4	150	10640	30	NaN	NaN	9630	70	NaN	NaN	9381	NaN	NaN	217	75.25	530	4	EHOL (7-11)	Ta-P7-5 Tahiti1	Bard et al. 1998, Durand et al. 2013		NaN	R-age by Radcal	1	1	1
-17.6	-149.4	150	10915	30	NaN	NaN	9850	70	NaN	NaN	9627	NaN	NaN	239	75	530	4	EHOL (7-11)	Ta-P7-6 Tahiti1	Bard et al. 1998, Durand et al. 2013		NaN	R-age by Radcal	1	1	1
-17.6	-149.4	150	11070	10	NaN	NaN	9880	70	NaN	NaN	9593	NaN	NaN	290	77	530	4		Ta-P7-7# Tahiti1	Bard et al. 1998, Durand et al. 2013		NaN	R-age by Radcal	1	1	1
-17.6	-149.4	150	11345	20	NaN	NaN	10160	45	NaN	NaN	9967	NaN	NaN	194	52.5	530	4		Ta-P7-8 Tahiti1	Bard et al. 1998, Durand et al. 2013		NaN	R-age by Radcal	1	1	1
-17.6	-149.4	150	11565	20	NaN	NaN	10330	50	NaN	NaN	10026	NaN	NaN	303	54.25	530	4		Ta-P7-9 Tahiti1	Bard et al. 1998, Durand et al. 2013		NaN	R-age by Radcal	1	1	1
-17.6	-149.4	150	12955	30	NaN	NaN	11480	45	NaN	NaN	11036	NaN	NaN	439	50.5	530	4	BA (12.8-14.8)	Ta-P8-1 Tahiti1	Bard et al. 1998, Durand et al. 2013		NaN	R-age by Radcal	1	1	1
-17.6	-149.4	150	13400	25	NaN	NaN	12030	40	NaN	NaN	11514	NaN	NaN	505	49.5	530	4	BA (12.8-14.8)	Ta-P8-2 Tahiti1	Bard et al. 1998, Durand et al. 2013		NaN	R-age by Radcal	1	1	1
-17.6	-149.4	150	13755	35	NaN	NaN	12260	45	NaN	NaN	11850	NaN	NaN	397	78	530	4	BA (12.8-14.8)	Ta-P8-3 Tahiti1	Bard et al. 1998, Durand et al. 2013		NaN	R-age by Radcal	1	1	1
-17.6	-149.4	150	13930	30	NaN	NaN	12490	45	NaN	NaN	12036	NaN	NaN	454	57.25	530	4	BA (12.8-14.8)	Ta-P8-4 Tahiti1	Bard et al. 1998, Durand et al. 2013		NaN	R-age by Radcal	1	1	1
-41.1	7.8	4981	12201	200	10900	45	11500	140	600	147	10406	494	45	1137	164.5	1602	8	YD (11.8-12.7)	TNO57-21	Barker et al. (2010)		9.83526	Revised age model from Barker and Diz (2014), Cal age uncertainty guestimate	1	1	1
-41.1	7.8	4981	12980	200	12200	75	12350	75	150	106	11047	1153	75	1296	256	1602	8	BA (12.8-14.8)	TNO57-21	Barker et al. (2010)		10.0154	Cal age uncertainty guestimate	1	1	1
-41.1	7.8	4981	13580	200	12700	55	13050	60	350	81	11701	999	55	1304	203.75	1602	8	BA (12.8-14.8)	TNO57-21	Barker et al. (2010)		10.3093	Cal age uncertainty guestimate	1	1	1
-41.1	7.8	4981	14180	200	12950	55	13700	75	750	93	12287	663	55	1426	157.5	1602	8	BA (12.8-14.8)	TNO57-21	Barker et al. (2010)		10.5783	Cal age uncertainty guestimate	1	1	1
-41.1	7.8	4981	14770	200	13150	70	13700	170	550	184	12370	780	70	1221	192.75	1602	8	BA (12.8-14.8)	TNO57-21	Barker et al. (2010)		10.8328	Cal age uncertainty guestimate	1	1	1
-41.1	7.8	4981	15892	200	14750	65	15750	65	1000	92	13239	1511	65	2509	157.25	1602	8	HS1 (15-17.5)	TNO57-21	Barker et al. (2010)		11.3265	Cal age uncertainty guestimate	1	1	1
-41.1	7.8	4981	16453	200	14850	60	15900	70	1050	92	13628	1222	60	2270	149.25	1602	8	HS1 (15-17.5)	TNO57-21	Barker et al. (2010)		11.548	Cal age uncertainty guestimate	1	1	1
-41.1	7.8	4981	17014	200	15650	80	16700	90	1050	120	13966	1684	80	2711	179.25	1602	8	HS1 (15-17.5)	TNO57-21	Barker et al. (2010)		11.755	Cal age uncertainty guestimate	1	1	1
-41.1	7.8	4981	17575	200	16050	65	17050	90	1000	111	14464	1586	65	2610	165.25	1602	8	HS1 (15-17.5)	TNO57-21	Barker et al. (2010)		11.9488	Cal age uncertainty guestimate	1	1	1
-41.1	7.8	4981	18697	200	16900	80	18100	110	1200	136	15352	1548	80	2741	240.5	1602	8		TNO57-21	Barker et al. (2010)		12.3014	Cal age uncertainty guestimate	1	1	1
-41.1	7.8	4981	19259	200	17400	70	18250	80	850	106	15975	1425	70	2286	199.5	1602	8	LGM (19-21.8)	TNO57-21	Barker et al. (2010)		12.4617	Cal age uncertainty guestimate	1	1	1
-41.1	7.8	4981	19820	200	18000	85	18700	130	700	155	16376	1624	85	2272	204.25	1602	8	LGM (19-21.8)	TNO57-21	Barker et al. (2010)		12.6135	Cal age uncertainty guestimate	1	1	1
-41.1	7.8	4981	21503	200	NaN	NaN	19800	120	NaN	NaN	17811	NaN	NaN	2049	169	1602	8	LGM (19-21.8)	TNO57-21	Barker et al. (2010)		NaN	Cal age uncertainty guestimate	1	1	1
-41.1	7.8	4981	22064	200	19300	90	20800	120	1500	150	18110	1190	90	2686	230.25	1602	8		TNO57-21	Barker et al. (2010)		13.1436	Cal age uncertainty guestimate	1	1	1
3.89	78.06	3166	2103	322	2523	108	3232	45	709	117	2117	406	108	1093	252	1989	5	HOL (<6)	SS152	Bharti et a., 2022	Low sed rate <2cm/kyr	1.42653		0	1	0
3.89	78.06	3166	2860	336	3164	45	3639	54	475	70	2771	393	45	859	251	1989	5	HOL (<6)	SS152	Bharti et a., 2022	Low sed rate <2cm/kyr	1.3986		0	1	0
3.89	78.06	3166	5761	275	5547	35	5625	28	78	45	5073.4	473.6	35	591	214	1989	5	HOL (<6)	SS152	Bharti et a., 2022	Low sed rate <2cm/kyr	1.56223		0	1	0
3.89	78.06	3166	6468	170	6190	75	6360	65	170	99	5688.6	501.4	75	667	178	1989	5		SS152	Bharti et a., 2022	Low sed rate <2cm/kyr	1.85529		0	1	0
3.89	78.06	3166	7523	250	7158	42	8332	25	1174	49	6678.2	479.8	42	1692	267	1989	5	EHOL (7-11)	SS152	Bharti et a., 2022	Low sed rate <2cm/kyr	2.12681		1	1	0
3.89	78.06	3166	8813	213	8405	45	8998	78	593	90	7991.8	413.2	45	1037	178	1989	5	EHOL (7-11)	SS152	Bharti et a., 2022	Low sed rate <2cm/kyr	2.04244		1	1	0
3.89	78.06	3166	9278	323	8715	47	10519	52	1804	70	8266.6	448.4	47	2234	176	1989	5	EHOL (7-11)	SS152	Bharti et a., 2022	Low sed rate <2cm/kyr	2.04786		1	1	0
3.89	78.06	3166	11897	326	10708	87	13122	79	2414	118	10226	482	87	2896	177	1989	5	YD (11.8-12.7)	SS152	Bharti et a., 2022	Low sed rate <2cm/kyr	1.84921		0	1	0
3.89	78.06	3166	12462	112	11081	34	13489	50	2408	60	10401	680	34	3052	94	1989	5	YD (11.8-12.7)	SS152	Bharti et a., 2022	Low sed rate <2cm/kyr	1.92585		0	1	0
3.89	78.06	3166	12697	194	11176	94	13496	49	2320	106	10653	523	94	2819	202	1989	5		SS152	Bharti et a., 2022	Low sed rate <2cm/kyr	2.04773		0	1	0
3.89	78.06	3166	14026	345	12551	60	16335	101	3784	117	12077	474	60	4198	267	1989	5	BA (12.8-14.8)	SS152	Bharti et a., 2022	Low sed rate <2cm/kyr	1.99629		0	1	0
3.89	78.06	3166	14917	228	13119	49	16251	53	3132	72	12517	602	49	3714	146	1989	5		SS152	Bharti et a., 2022	Low sed rate <2cm/kyr	1.94409		0	1	0
3.89	78.06	3166	15758	191	13678	37	18825	57	5147	68	13142	536	37	5681	147	1989	5	HS1 (15-17.5)	SS152	Bharti et a., 2022	Low sed rate <2cm/kyr	2.09417		1	1	0
3.89	78.06	3166	16610	209	14369	76	19904	86	5535	115	13733	636	76	6175	160	1989	5	HS1 (15-17.5)	SS152	Bharti et a., 2022	Low sed rate <2cm/kyr	2.10716		1	1	0
3.89	78.06	3166	17165	209	14812	42	19831	110	5019	118	14159	653	42	5707	206	1989	5	HS1 (15-17.5)	SS152	Bharti et a., 2022	Low sed rate <2cm/kyr	2.09729		1	1	0
3.89	78.06	3166	18000	297	15495	38	19921	85	4426	93	14683	812	38	5238	261	1989	5		SS152	Bharti et a., 2022	Low sed rate <2cm/kyr	2.05556		0	1	0
3.89	78.06	3166	18928	385	16453	199	20483	107	4030	226	15691	762	199	4793	384	1989	5	LGM (19-21.8)	SS152	Bharti et a., 2022	Low sed rate <2cm/kyr	2.00761		1	1	0
6.03	89.94	2788	6091	372	5823	40	6823	48	1000	62	5276.4	546.6	40	1503	341	1919	5	HOL (<6)	SS172	Bharti et a., 2022	Low sed rate <2cm/kyr	0.49253		0	1	0
6.03	89.94	2788	7633	382	7317	59	8023	60	706	84	6798.6	518.4	59	1204	388	1919	5	EHOL (7-11)	SS172	Bharti et a., 2022	Low sed rate <2cm/kyr	0.65505		0	1	0
6.03	89.94	2788	9347	369	8797	33	10699	67	1902	75	8340.8	456.2	33	2363	279	1919	5	EHOL (7-11)	SS172	Bharti et a., 2022	Low sed rate <2cm/kyr	0.85589		0	1	0
6.03	89.94	2788	11474	269	10438	52	12440	63	2002	82	10018	420	52	2428	195	1919	5		SS172	Bharti et a., 2022	Low sed rate <2cm/kyr	1.04584		0	1	0
6.03	89.94	2788	12094	167	10789	46	13639	36	2850	58	10332	457	46	3301	87	1919	5	YD (11.8-12.7)	SS172	Bharti et a., 2022	Low sed rate <2cm/kyr	1.1576		0	1	0
6.03	89.94	2788	12667	200	11296	74	13553	42	2257	85	10594	702	74	2925	117	1919	5		SS172	Bharti et a., 2022	Low sed rate <2cm/kyr	1.18418		0	1	0
6.03	89.94	2788	13643	177	12271	61	15028	52	2757	80	11808	463	61	3227	177	1919	5	BA (12.8-14.8)	SS172	Bharti et a., 2022	Low sed rate <2cm/kyr	1.31936		0	1	0
6.03	89.94	2788	14174	127	12804	65	15722	54	2918	85	12281	523	65	3447	121	1919	5	BA (12.8-14.8)	SS172	Bharti et a., 2022	Low sed rate <2cm/kyr	1.41103		0	1	0
6.03	89.94	2788	14370	139	12672	48	15672	61	3000	78	12398	274	48	3293	91	1919	5	BA (12.8-14.8)	SS172	Bharti et a., 2022	Low sed rate <2cm/kyr	1.46138		0	1	0
6.03	89.94	2788	14986	252	13110	51	17048	85	3938	99	12581	529	51	4462	176	1919	5		SS172	Bharti et a., 2022	Low sed rate <2cm/kyr	1.53477		0	1	0
6.03	89.94	2788	15946	437	14283	57	18610	71	4327	91	13266	1017	57	5323	303	1919	5	HS1 (15-17.5)	SS172	Bharti et a., 2022	Low sed rate <2cm/kyr	1.50508		0	1	0
6.03	89.94	2788	16680	548	13628	59	18719	101	5091	117	13780	-152	59	4939	390	1919	5	HS1 (15-17.5)	SS172	Bharti et a., 2022	Low sed rate <2cm/kyr	1.4988		0	1	0
6.03	89.94	2788	17724	542	15469	66	19189	63	3720	91	14467	1002	66	4669	432	1919	5	HS1 (15-17.5)	SS172	Bharti et a., 2022	Low sed rate <2cm/kyr	1.46694		0	1	0
6.03	89.94	2788	18290	541	15093	57	19991	73	4898	93	15108	-15	57	4913	473	1919	5		SS172	Bharti et a., 2022	Low sed rate <2cm/kyr	1.47622		0	1	0
6.03	89.94	2788	19139	497	17263	75	20179	90	2916	117	15877	1386	75	4286	449	1919	5	LGM (19-21.8)	SS172	Bharti et a., 2022	Low sed rate <2cm/kyr	1.46298		0	1	0
6.03	89.94	2788	19658	401	16890	67	20220	66	3330	94	16382	508	67	3890	330	1919	5	LGM (19-21.8)	SS172	Bharti et a., 2022	Low sed rate <2cm/kyr	1.47523		0	1	0
6.03	89.94	2788	20849	426	19050	78	21909	62	2859	100	17250	1800	78	4624	327	1919	5	LGM (19-21.8)	SS172	Bharti et a., 2022	Low sed rate <2cm/kyr	1.43892		0	1	0
6.03	89.94	2788	21745	412	18587	80	21820	96	3233	125	17834	753	80	3940	345	1919	5	LGM (19-21.8)	SS172	Bharti et a., 2022	Low sed rate <2cm/kyr	1.4716		0	1	0
6.03	89.94	2788	24039	359	21020	135	24698	132	3678	189	20034	986	135	4649	340	1919	5		SS172	Bharti et a., 2022	Low sed rate <2cm/kyr	1.41437		0	1	0
6.03	89.94	2788	24466	230	21088	76	24797	114	3709	137	20352	736	76	4418	202	1919	5		SS172	Bharti et a., 2022	Low sed rate <2cm/kyr	1.47143		0	1	0
6.03	89.94	2788	26518	286	23147	87	27732	77	4585	116	22428	719	87	5412	243	1919	5	preLGM (25-30)	SS172	Bharti et a., 2022	Low sed rate <2cm/kyr	1.50841		0	1	0
6.03	89.94	2788	27600	290	24289	87	29832	85	5543	122	23302	987	87	6468	384	1919	5	preLGM (25-30)	SS172	Bharti et a., 2022	Low sed rate <2cm/kyr	1.5942		0	1	0
6.03	89.94	2788	28849	909	23883	120	29158	134	5275	180	24639	-756	120	4458	897	1919	5	preLGM (25-30)	SS172	Bharti et a., 2022	Low sed rate <2cm/kyr	1.59451		0	1	0
6.03	89.94	2788	32962	592	29376	79	32069	112	2693	137	28541	835	79	3451	416	1919	5		SS172	Bharti et a., 2022	Low sed rate <2cm/kyr	1.5169		0	1	0
6.03	89.94	2788	35868	295	32247	91	35841	180	3594	202	31438	809	91	4363	380	1919	5		SS172	Bharti et a., 2022	Low sed rate <2cm/kyr	1.56128		0	1	0
6.03	89.94	2788	37062	299	33215	166	38074	208	4859	266	32749	466	166	5338	340	1919	5		SS172	Bharti et a., 2022	Low sed rate <2cm/kyr	1.72684		0	1	0
-3.74917	-81.1342	373	1074	46	1680	40	1960	20	280	45	1193	487	40	786	44	933	4	HOL (<6)	CDH 23	Bova et al. (2018)		27.933		1	1	1
-3.74917	-81.1342	373	3116	47	3420	35	3330	25	-90	43	2959	461	35	379	42.5	933	4	HOL (<6)	CDH 23	Bova et al. (2018)	Negative B-P	51.3479		0	0	0
-3.74917	-81.1342	373	3801	46	3980	35	4290	25	310	43	3470	510	35	782	47.75	933	4	HOL (<6)	CDH 23	Bova et al. (2018)		68.5346		1	1	1
-3.74917	-81.1342	373	4538	56	4540	40	4660	25	120	47	4090	450	40	591	54.25	933	4	HOL (<6)	CDH 23	Bova et al. (2018)		77.2367		1	1	1
-3.74917	-81.1342	373	4538	57	4540	40	4730	20	190	45	4090	450	40	660	52.25	933	4	HOL (<6)	CDH 23	Bova et al. (2018)		77.2367		1	1	1
-3.74917	-81.1342	373	5921	28	5720	30	6370	50	650	58	5167	553	30	1206	77	933	4	HOL (<6)	CDH 23	Bova et al. (2018)		84.4452		1	1	1
-3.74917	-81.1342	373	6460	39	6230	35	6380	50	150	61	5693	537	35	695	66.5	933	4		CDH 23	Bova et al. (2018)		85.1393		1	1	1
-3.74917	-81.1342	373	6781	52	6510	45	6850	25	340	51	5947	563	45	888	54.25	933	4		CDH 23	Bova et al. (2018)		88.4825		1	1	1
-3.74917	-81.1342	373	9048	56	8600	45	8990	30	390	54	8178.2	421.8	45	842	80.25	933	4	EHOL (7-11)	CDH 23	Bova et al. (2018)		99.4695		1	1	1
-3.74917	-81.1342	373	9793	98	9220	60	9510	30	290	67	8803.6	416.4	60	720	64.75	933	4	EHOL (7-11)	CDH 23	Bova et al. (2018)		102.139		1	1	1
-3.74917	-81.1342	373	10744	74	9920	40	10150	35	230	53	9506.2	413.8	40	639	73.75	933	4	EHOL (7-11)	CDH 23	Bova et al. (2018)		102.383		1	1	1
-3.74917	-81.1342	373	11950	70	10750	45	10950	45	200	64	10281	469	45	687	68.75	933	4	YD (11.8-12.7)	CDH 23	Bova et al. (2018)		102.929		1	1	1
-3.74917	-81.1342	373	12975	57	11650	55	11650	35	0	65	11048	602	55	604	53.25	933	4	BA (12.8-14.8)	CDH 23	Bova et al. (2018)		104.855		1	1	1
-3.74917	-81.1342	373	12976	57	11650	55	11500	40	-150	68	11048	602	55	454	56.75	933	4	BA (12.8-14.8)	CDH 23	Bova et al. (2018)	Negative B-P	104.847		0	0	0
-3.74917	-81.1342	373	13321	60	12000	55	12200	45	200	71	11466	534	55	747	80	933	4	BA (12.8-14.8)	CDH 23	Bova et al. (2018)		108.1		1	1	1
-3.74917	-81.1342	373	13536	82	12200	70	12350	40	150	81	11749	451	70	655	102.75	933	4	BA (12.8-14.8)	CDH 23	Bova et al. (2018)		110.816		1	1	1
-3.74917	-81.1342	373	14375	171	12800	95	12950	45	150	105	12398	402	95	569	95.25	933	4	BA (12.8-14.8)	CDH 23	Bova et al. (2018)		118.261		1	1	1
-3.986	-81.3087	1023	7378	31	7070	35	7620	40	550	53	6459.8	610.2	35	1170	56.75	1513	4	EHOL (7-11)	CDH 26	Bova et al. (2018)		31.9192		1	1	1
-3.986	-81.3087	1023	10153	44	9460	40	9840	45	380	60	8917.2	542.8	40	914	78.75	1513	4	EHOL (7-11)	CDH 26	Bova et al. (2018)		41.4656		1	1	1
-3.986	-81.3087	1023	11948	69	10750	45	11700	55	950	71	10277	473	45	1439	75.5	1513	4	YD (11.8-12.7)	CDH 26	Bova et al. (2018)		48.0415		1	1	1
-3.986	-81.3087	1023	12978	48	11650	45	12400	40	750	60	11047	603	45	1352	50.5	1513	4	BA (12.8-14.8)	CDH 26	Bova et al. (2018)		51.0865		1	1	1
-3.986	-81.3087	1023	13705	58	12350	50	13500	75	1150	90	11827	523	50	1661	95.75	1513	4	BA (12.8-14.8)	CDH 26	Bova et al. (2018)		57.2419		1	1	1
-3.986	-81.3087	1023	14913	84	13100	60	14200	90	1100	108	12515	585	60	1677	115.25	1513	4		CDH 26	Bova et al. (2018)		62.9987		1	1	1
-3.986	-81.3087	1023	15955	80	13900	60	14800	65	900	88	13272	628	60	1520	90.25	1513	4	HS1 (15-17.5)	CDH 26	Bova et al. (2018)		72.4851		1	1	1
-3.986	-81.3087	1023	17513	90	15150	65	16000	60	850	88	14448	702	65	1568	98	1513	4	HS1 (15-17.5)	CDH 26	Bova et al. (2018)		79.9692		1	1	1
-3.986	-81.3087	1023	19675	85	17050	70	18050	70	1000	99	16384	666	70	1702	105	1513	4	LGM (19-21.8)	CDH 26	Bova et al. (2018)		88.4879		1	1	1
-3.986	-81.3087	1023	20460	82	17700	70	18950	100	1250	122	16917	783	70	2020	139.25	1513	4	LGM (19-21.8)	CDH 26	Bova et al. (2018)		92.6197		1	1	1
-3.986	-81.3087	1023	21928	123	18850	110	19700	90	850	142	17968	882	110	1721	142.5	1513	4		CDH 26	Bova et al. (2018)		93.3966		1	1	1
-3.986	-81.3087	1023	24098	96	20900	80	22300	160	1400	179	20056	844	80	2222	185.25	1513	4		CDH 26	Bova et al. (2018)		99.0124		1	1	1
-1.26567	-89.698	595	10323	118	9580	50	9560	50	-20	71	9196.4	383.6	50	369	129.25	1105	4	EHOL (7-11)	CDH41	Bova et al. (2018)	Extreme depletions (Negative B-P), Low sed rate <2cm/kyr	0.0242178		0	0	0
-1.26567	-89.698	595	11558	129	10500	45	11900	50	1400	67	10026	474	45	1859	76	1105	4		CDH41	Bova et al. (2018)	Extreme depletions, Low sed rate <2cm/kyr	0.389341		0	0	0
-1.26567	-89.698	595	13427	130	12150	100	14900	70	2750	122	11539	611	100	3338	158	1105	4	BA (12.8-14.8)	CDH41	Bova et al. (2018)	Extreme depletions, Low sed rate <2cm/kyr	0.744768		0	0	0
-1.26567	-89.698	595	13961.5	68	12550	45	15300	65	2750	79	12002	548	45	3253	91.25	1105	4	BA (12.8-14.8)	CDH41	Bova et al. (2018)	Extreme depletions, Low sed rate <2cm/kyr	1.09229		0	0	0
-1.26567	-89.698	595	14281	101	12750	55	14600	70	1850	89	12330	420	55	2260	93.75	1105	4	BA (12.8-14.8)	CDH41	Bova et al. (2018)	Extreme depletions, Low sed rate <2cm/kyr	1.2079		0	0	0
-1.26567	-89.698	595	14871.5	264	11850	65	14150	70	2300	96	12501	-651	65	1631	160	1105	4		CDH41	Bova et al. (2018)	Extreme depletions (flyer), Low sed rate <2cm/kyr	1.36166		0	0	0
-1.26567	-89.698	595	15722	85	13800	55	15500	75	1700	93	13113	687	55	2385	105.75	1105	4	HS1 (15-17.5)	CDH41	Bova et al. (2018)	Extreme depletions, Low sed rate <2cm/kyr	1.60603		0	0	0
-1.26567	-89.698	595	15907	76	14350	60	15400	95	1050	112	13246	1104	60	2151	111.5	1105	4	HS1 (15-17.5)	CDH41	Bova et al. (2018)	Extreme depletions (flyer), Low sed rate <2cm/kyr	1.88596		0	0	0
-1.26567	-89.698	595	16060	64	13950	60	16500	80	2550	100	13356	594	60	3147	95	1105	4	HS1 (15-17.5)	CDH41	Bova et al. (2018)	Extreme depletions	2.19489		0	0	0
-1.26567	-89.698	595	16257	85	12700	50	14950	60	2250	78	13480	-780	50	1466	92.5	1105	4	HS1 (15-17.5)	CDH41	Bova et al. (2018)	Extreme depletions (flyer)	2.47586		0	0	0
-1.26567	-89.698	595	16484	74	14300	70	16700	80	2400	106	13643	657	70	3052	98.5	1105	4	HS1 (15-17.5)	CDH41	Bova et al. (2018)	Extreme depletions	2.86642		0	0	0
-1.26567	-89.698	595	16735	94	14450	60	17700	90	3250	108	13806	644	60	3899	106	1105	4	HS1 (15-17.5)	CDH41	Bova et al. (2018)	Extreme depletions	3.30146		0	0	0
-1.26567	-89.698	595	18125.5	144	15650	80	18850	150	3200	170	14732	918	80	4065	237.25	1105	4		CDH41	Bova et al. (2018)	Extreme depletions	3.86196		0	0	0
-1.26567	-89.698	595	20971.5	158	18150	90	21000	130	2850	158	17431	719	90	3590	192	1105	4	LGM (19-21.8)	CDH41	Bova et al. (2018)	Extreme depletions	4.29154		0	0	0
-1.26567	-89.698	595	21813	129	18750	100	22300	160	3550	189	17887	863	100	4403	184.25	1105	4	LGM (19-21.8)	CDH41	Bova et al. (2018)	Extreme depletions	4.59588		0	0	0
-1.26567	-89.698	595	22772	142	19700	140	21600	210	1900	252	18791	909	140	2780	247.5	1105	4		CDH41	Bova et al. (2018)	Extreme depletions	5.06104		0	0	0
-1.26567	-89.698	595	23479.5	124	20400	120	23100	220	2700	251	19569	831	120	3606	234.75	1105	4		CDH41	Bova et al. (2018)	Extreme depletions	5.7497		0	0	0
-1.26567	-89.698	595	23851.5	114	20600	120	23500	240	2900	268	19888	712	120	3658	306	1105	4		CDH41	Bova et al. (2018)	Extreme depletions	7.12743		0	0	0
-1.26567	-89.698	595	25178.5	569	14200	60	24200	350	10000	355	20876	-6676	60	3281	623	1105	4	preLGM (25-30)	CDH41	Bova et al. (2018)	Extreme depletions (flyer)	8.54896		0	0	0
-1.26567	-89.698	595	26171	618	17950	70	25500	140	7550	157	21971	-4021	70	3493	598	1105	4	preLGM (25-30)	CDH41	Bova et al. (2018)	Extreme depletions (flyer)	8.98896		0	0	0
-1.26567	-89.698	595	27277.5	562	24700	210	29800	710	5100	740	22999	1701	210	6746	927.25	1105	4	preLGM (25-30)	CDH41	Bova et al. (2018)	Extreme depletions	9.35753		0	0	0
-1.26567	-89.698	595	27519	398	24000	120	28100	180	4100	216	23289	711	120	4783	494.25	1105	4	preLGM (25-30)	CDH41	Bova et al. (2018)	Extreme depletions	10.0022		0	0	0
-1.26567	-89.698	595	28783	475	27200	190	27000	140	-200	236	24559	2641	190	2438	426.75	1105	4	preLGM (25-30)	CDH41	Bova et al. (2018)	Extreme depletions (Negative B-P)	10.0841		0	0	0
-1.26567	-89.698	595	29612	273	26200	260	28100	320	1900	412	25288	912	260	2777	400.5	1105	4	preLGM (25-30)	CDH41	Bova et al. (2018)	Extreme depletions	10.4772		0	0	0
-1.25217	-89.6845	617	1381	52	1990	50	2080	20	90	54	1511	479	50	565	70.25	1105	4	HOL (<6)	GGC43	Bova et al. (2018)	Extreme depletions, Low sed rate <2cm/kyr	1.44823		0	0	0
-1.25217	-89.6845	617	4667	58	4630	40	5420	30	790	50	4166	464	40	1274	43.25	1105	4	HOL (<6)	GGC43	Bova et al. (2018)	Extreme depletions	8.57082		0	0	0
-1.25217	-89.6845	617	6278	36	6050	35	6520	30	470	46	5436	614	35	1067	70.75	1105	4		GGC43	Bova et al. (2018)	Extreme depletions	11.2297		0	0	0
-1.25217	-89.6845	617	8327	52	8030	50	8180	40	150	64	7467.4	562.6	50	699	80.5	1105	4	EHOL (7-11)	GGC43	Bova et al. (2018)	Extreme depletions	12.0091		0	0	0
-1.25217	-89.6845	617	9311	49	8800	40	9040	40	240	57	8315.2	484.8	40	738	61	1105	4	EHOL (7-11)	GGC43	Bova et al. (2018)	Extreme depletions	15.036		0	0	0
-1.25217	-89.6845	617	11116	34	10150	35	10300	30	150	46	9658	492	35	653	51.75	1105	4		GGC43	Bova et al. (2018)	Extreme depletions	16.1929		0	0	0
-1.25217	-89.6845	617	12533	69	11150	70	12200	55	1050	89	10535	615	70	1700	89.5	1105	4	YD (11.8-12.7)	GGC43	Bova et al. (2018)	Extreme depletions	17.5537		0	0	0
-2	-140	4400	17753.5	603	15300	55	16400	60	1100	81	14479	821	55	1861	476.75	1909	4	HS1 (15-17.5)	TTN013-18	Broecker and Clark (2010)	Low sed rate <2cm/kyr	1.85879		0	1	0
-2	-140	4400	22189.5	506	19125	75	20700	70	1575	103	18229	896	75	2440	380.75	1909	4	LGM (19-21.8)	TTN013-18	Broecker and Clark (2010)	Low sed rate <2cm/kyr	1.75759		0	1	0
-2	-140	4400	24685.5	377	21375	140	22500	110	1125	178	20531	844	140	1981	310	1909	4	preLGM (25-30)	TTN013-18	Broecker and Clark (2010)	Low sed rate <2cm/kyr	1.74191		0	1	0
-2	-140	4400	26061.5	327	22650	120	23500	180	850	216	21947	703	120	1627	410.5	1909	4	preLGM (25-30)	TTN013-18	Broecker and Clark (2010)	Low sed rate <2cm/kyr	1.76506		0	1	0
-2	-140	4400	27362.5	329	24225	180	25000	190	775	262	23192	1033	180	1865	460.25	1909	4	preLGM (25-30)	TTN013-18	Broecker and Clark (2010)	Low sed rate <2cm/kyr	1.71768		0	1	0
-2	-140	4400	28556.5	526	22333.3	190	23000	110	666.667	220	24243	-1909.67	190	1314	-456	1909	4	preLGM (25-30)	TTN013-18	Broecker and Clark (2010)	Low sed rate <2cm/kyr	1.78593		0	1	0
-2	-140	4400	30101.5	686	22513.3	180	22610	180	96.6667	255	25902	-3388.67	180	3339	-639.5	1909	4	preLGM (25-30)	TTN013-18	Broecker and Clark (2010)	Low sed rate <2cm/kyr	1.82715		0	1	0
-2	-140	4400	31790	466	28545	180	30000	180	1455	255	27908	637	180	2070	482.75	1909	4		TTN013-18	Broecker and Clark (2010)	Low sed rate <2cm/kyr	1.85593		0	1	0
-10.2833	-111.333	3225	14363	251	12780	160	16220	300	3440	340	12397	383	160	3873	324	1948	4	BA (12.8-14.8)	TT154-10	Broecker et al. (1988a)	Low sed rate <2cm/kyr *	1.81021		0	1	0
-10.2833	-111.333	3225	18520	232	16040	225	17500	380	1460	442	15114	926	225	2281	441	1948	4		TT154-10	Broecker et al. (1988a)	Low sed rate <2cm/kyr *	1.61987		0	1	0
-10.2833	-111.333	3225	19101	273	16560	240	19170	420	2610	484	15833	727	240	3345	490	1948	4	LGM (19-21.8)	TT154-10	Broecker et al. (1988a)	Low sed rate <2cm/kyr *	1.78001		0	1	0
-10.2833	-111.333	3225	20078	439	17390	370	20180	610	2790	713	16607	783	370	3540	696	1948	4	LGM (19-21.8)	TT154-10	Broecker et al. (1988a)	Low sed rate <2cm/kyr *	1.79301		0	1	0
-10.2833	-111.333	3225	23263	228	20110	220	21980	640	1870	677	19368	742	220	2637	660	1948	4		TT154-10	Broecker et al. (1988a)	Low sed rate <2cm/kyr *	1.71947		0	1	0
-10.2833	-111.333	3225	7013	120	6715	110	9400	120	2685	163	6163.8	551.2	110	3262	150	1948	4	EHOL (7-11)	TT154-10	Broecker et al. (1988b)	Low sed rate <2cm/kyr *	1.71111		0	1	0
1.01667	160.483	3120	7542	148	7252.5	160	9530	80	2277.5	179	6625	627.5	160	2861	191	1986	3	EHOL (7-11)	V28-238	Broecker et al. (1988b)	Low sed rate <2cm/kyr *	1.32591		0	1	0
1.01667	160.483	3120	8885	139	8485	100	12080	120	3595	156	7969	516	100	4084	153	1986	3	EHOL (7-11)	V28-238	Broecker et al. (1988b)	Low sed rate <2cm/kyr *	1.46314		0	1	0
1.01667	160.483	3120	10670	281	9852.5	220	11660	260	1807.5	341	9432	420.5	220	2229	327	1986	3	EHOL (7-11)	V28-238	Broecker et al. (1988b)	Low sed rate <2cm/kyr *	1.68697		0	1	0
1.01667	160.483	3120	13605	559	12165	460	16140	390	3975	603	11797	368	460	4375	631	1986	3	BA (12.8-14.8)	V28-238	Broecker et al. (1988b)	Low sed rate <2cm/kyr	2.20507		0	1	0
1.01667	160.483	3120	21688	450	18700	390	20650	220	1950	448	17801	899	390	2789	415	1986	3	LGM (19-21.8)	V28-238	Broecker et al. (1988b)	Low sed rate <2cm/kyr *	1.89045		0	1	0
1.01667	160.483	3120	23145	283	20000	260	22110	350	2110	436	19284	716	260	2873	437	1986	3		V28-238	Broecker et al. (1988b)	Low sed rate <2cm/kyr *	1.94426		0	1	0
1.01667	160.483	3120	25111	1282	21832.5	1290	22440	690	607.5	1463	20799	1033.5	1290	1396	641	1986	3	preLGM (25-30)	V28-238	Broecker et al. (1988b)	Low sed rate <2cm/kyr *	1.99116		0	1	0
4.867	-43.217	3995	16142	375	14045	295	14760	140	715	327	13399	646	295	1344	288	949	1	HS1 (15-17.5)	KNR110 50GGC	Broecker et al. (1990a)	Low sed rate <2cm/kyr *	1.239		0	1	0
4.867	-43.217	3995	19433	169	16853	130	17110	190	257	230	16061	792	130	1011	242	949	1	LGM (19-21.8)	KNR110 50GGC	Broecker et al. (1990a)	Low sed rate <2cm/kyr *	1.13209	seems anomalous	0	0	0
4.867	-43.217	3995	20176	133	17450	115	18360	200	910	231	16682	768	115	1673	224	949	1	LGM (19-21.8)	KNR110 50GGC	Broecker et al. (1990a)	Low sed rate <2cm/kyr *	1.33822	seems anomalous	0	0	0
4.867	-43.217	3995	21338	262	18405	205	19110	190	705	280	17596	809	205	1461	253	949	1	LGM (19-21.8)	KNR110 50GGC	Broecker et al. (1990a)	Low sed rate <2cm/kyr *	1.45281	seems anomalous	0	0	0
4.867	-43.217	3995	22278	265	19195	245	20360	220	1165	329	18309	886	245	2009	347	949	1		KNR110 50GGC	Broecker et al. (1990a)	Low sed rate <2cm/kyr *	1.57106		0	1	0
4.567	-43.383	3547	19070	124	16555	105	17030	150	475	183	15806	749	105	1214	190	949	1	LGM (19-21.8)	KNR110 66GGC	Broecker et al. (1990a)	(study flag)	2.35973		1	1	1
4.567	-43.383	3547	19547	145	16945	115	17690	150	745	189	16208	737	115	1477	204	949	1	LGM (19-21.8)	KNR110 66GGC	Broecker et al. (1990a)	(study flag)	2.50678		1	1	1
4.567	-43.383	3547	20933	157	18100	120	18630	180	530	216	17380	720	120	1263	231	949	1	LGM (19-21.8)	KNR110 66GGC	Broecker et al. (1990a)	(study flag)	2.53189		1	1	1
4.567	-43.383	3547	22001	151	18920	135	19540	220	620	258	18035	885	135	1487	259	949	1		KNR110 66GGC	Broecker et al. (1990a)	(study flag)	2.54534		1	1	1
4.333	-43.483	2816	16044	129	13970	100	14930	200	960	224	13346	624	100	1589	216	870	1	HS1 (15-17.5)	KNR110 82GGC	Broecker et al. (1990a)	Low sed rate <2cm/kyr *	1.55821		0	1	0
4.333	-43.483	2816	17379	106	15050	75	16350	280	1300	290	14296	754	75	2051	299	870	1	HS1 (15-17.5)	KNR110 82GGC	Broecker et al. (1990a)	Low sed rate <2cm/kyr *	1.72622		0	1	0
4.333	-43.483	2816	18500	143	16020	145	16130	240	110	280	15143	877	145	938	268	870	1		KNR110 82GGC	Broecker et al. (1990a)	Low sed rate <2cm/kyr *	1.89189		0	1	0
4.333	-43.483	2816	19724	309	17085	255	17870	370	785	449	16358	727	255	1516	439	870	1	LGM (19-21.8)	KNR110 82GGC	Broecker et al. (1990a)	(study flag)	2.02799		1	1	1
4.333	-43.483	2816	20408	220	17650	190	17900	640	250	668	16861	789	190	1007	504	870	1	LGM (19-21.8)	KNR110 82GGC	Broecker et al. (1990a)	(study flag)	2.20502		1	1	1
11.933	-78.683	1800	19671	117	17045	100	17300	150	255	180	16385	660	100	968	181	742	1	LGM (19-21.8)	Vema28-122	Broecker et al. (1990a)	(study flag)	5.84617		1	1	1
11.933	-78.683	1800	20259	171	17525	145	17610	180	85	231	16743	782	145	856	230	742	1	LGM (19-21.8)	Vema28-122	Broecker et al. (1990a)	(study flag)	6.07138		1	1	1
11.933	-78.683	1800	21149.5	470	18245	405	18530	420	285	583	17546	699	405	1014	521	742	1	LGM (19-21.8)	Vema28-122	Broecker et al. (1990a)	(study flag)	6.09943		1	1	1
18.9167	115.75	2695	1236	70	2040	70	3970	80	1930	106	1254	786	70	2675	116.75	1986	3	HOL (<6)	50-37KL	Broecker et al. (1990b)		6.47249		1	1	1
18.9167	115.75	2695	5972	93	5960	80	8270	100	2310	128	5213.6	746.4	80	3047	137	1986	3	HOL (<6)	50-37KL	Broecker et al. (1990b)		6.69792		1	1	1
18.9167	115.75	2695	8647	138	8500	110	10030	120	1530	163	7909	591	110	2165	164.5	1986	3	EHOL (7-11)	50-37KL	Broecker et al. (1990b)		6.93882		1	1	1
18.9167	115.75	2695	11364	134	10560	100	11890	110	1330	149	9987	573	100	1932	160.5	1986	3		50-37KL	Broecker et al. (1990b)		7.03977		1	1	1
18.9167	115.75	2695	13950	203	12730	140	13710	120	980	184	12008	722	140	1647	209.5	1986	3	BA (12.8-14.8)	50-37KL	Broecker et al. (1990b)		11.1111		1	1	1
18.9167	115.75	2695	17258	188	15140	150	17100	220	1960	266	14150	990	150	2902	269.75	1986	3	HS1 (15-17.5)	50-37KL	Broecker et al. (1990b)		9.27106		1	1	1
18.9167	115.75	2695	18174	130	15910	110	17430	140	1520	178	14782	1128	110	2589	229	1986	3		50-37KL	Broecker et al. (1990b)		9.62914		1	1	1
18.9167	115.75	2695	18280	135	16000	120	17590	140	1590	184	15078	922	120	2547	227.75	1986	3		50-37KL	Broecker et al. (1990b)		10.1204		1	1	1
18.9167	115.75	2695	19939	192	17460	160	18940	160	1480	226	16533	927	160	2426	214.75	1986	3	LGM (19-21.8)	50-37KL	Broecker et al. (1990b)		9.77983		1	1	1
18.9167	115.75	2695	20177	223	17660	180	19445	190	1785	262	16682	978	180	2751	261.5	1986	3	LGM (19-21.8)	50-37KL	Broecker et al. (1990b)		10.1601	Delta-R from Wan and Jian (2014)	1	1	1
-1	146	1900	21449	203	18636	150	20590	140	1954	205	17769	867	150	2872	186	1864	4	LGM (19-21.8)	MD97-2138	Broecker et al. (2004a)		9.6508		1	1	1
-1	146	1900	21830	234	18950	200	20590	150	1640	250	17901	1049	200	2666	227.5	1864	4	LGM (19-21.8)	MD97-2138	Broecker et al. (2004a)		9.6656		1	1	1
6	126	2100	18867	161	16520	150	17690	130	1170	198	15601	919	150	2094	237.5	1905	3	LGM (19-21.8)	MD98-2181	Broecker et al. (2004a)		67.3133		1	1	1
6	126	2100	19088	165	16725	150	18050	130	1325	198	15821	904	150	2218	202.25	1905	3	LGM (19-21.8)	MD98-2181	Broecker et al. (2004a)		66.1148		1	1	1
6	126	2100	19445	186	17025	150	18350	120	1325	192	16073	952	150	2245	200.25	1905	3	LGM (19-21.8)	MD98-2181	Broecker et al. (2004a)		65.7753		1	1	1
-1.5	-85.8	2570	19305	142	16750	120	18455	140	1705	184	15986	764	120	2462	180.75	2036	4	LGM (19-21.8)	RC11-238	Broecker et al. (2004b)		4.921		1	1	1
-1.5	-85.8	2570	20909	187	18080	150	20160	150	2080	212	17344	736	150	2818	220.75	2036	4	LGM (19-21.8)	RC11-238	Broecker et al. (2004b)		5.02176		1	1	1
-0.5	-82.1	1370	18095	109	15635	110	16650	150	1015	186	14720	915	110	1904	202.75	1684	4		V19-27	Broecker et al. (2004b)		4.97375		1	1	1
-0.5	-82.1	1370	21155	170	18270	130	19355	140	1085	191	17548	722	130	1817	188	1684	4	LGM (19-21.8)	V19-27	Broecker et al. (2004b)		4.72701		1	1	1
-5.5	-106.8	3180	17799	132	15365	100	17090	110	1725	149	14514	851	100	2551	142	1985	4		V21-40	Broecker et al. (2004b)		4.21372		1	1	1
-5.5	-106.8	3180	21007.5	317	18140	250	20370	150	2230	292	17470	670	250	2938	285	1985	4	LGM (19-21.8)	V21-40	Broecker et al. (2004b)		4.04617		1	1	1
1	130	2800	820	83	1597	88	2790	35	1193	95	943	654	88	1865	102.75	1951	3	HOL (<6)	MD01-2386	Broecker et al. (2008)		NaN		1	1	1
1	130	2800	4976	111	5043	90	6800	60	1757	108	4416	627	90	2389	116.5	1951	3	HOL (<6)	MD01-2386	Broecker et al. (2008)		19.6945		1	1	1
1	130	2800	9940	127	9473	91	10750	110	1277	143	8879	594	91	1895	127.25	1951	3	EHOL (7-11)	MD01-2386	Broecker et al. (2008)		19.9195		1	1	1
1	130	2800	10893	128	10166	91	11550	70	1384	115	9624.4	541.6	91	1973	96.25	1951	3	EHOL (7-11)	MD01-2386	Broecker et al. (2008)		20.4719		1	1	1
1	130	2800	12290	105	11120	72	12550	55	1430	91	10417	703	72	2166	67.25	1951	3	YD (11.8-12.7)	MD01-2386	Broecker et al. (2008)		20.179		1	1	1
1	130	2800	12830	86	11662	93	12900	70	1238	116	10930	732	93	1962	139	1951	3	BA (12.8-14.8)	MD01-2386	Broecker et al. (2008)		21.2783		1	1	1
1	130	2800	13884	122	12644	94	14100	210	1456	230	12059	585	94	2092	233	1951	3	BA (12.8-14.8)	MD01-2386	Broecker et al. (2008)		21.4636		1	1	1
1	130	2800	14049	188	12761	122	14200	75	1439	143	12128	633	122	2052	168.25	1951	3	BA (12.8-14.8)	MD01-2386	Broecker et al. (2008)		22.991		1	1	1
1	130	2800	15196	164	13480	126	15100	85	1620	152	12741	739	126	2355	150.5	1951	3	HS1 (15-17.5)	MD01-2386	Broecker et al. (2008)		22.9008		1	1	1
1	130	2800	16195	150	14250	117	15350	250	1100	276	13434	816	117	1905	268	1951	3	HS1 (15-17.5)	MD01-2386	Broecker et al. (2008)		23.0318		1	1	1
1	130	2800	16339	130	14362	102	16000	95	1638	139	13553	809	102	2451	134.5	1951	3	HS1 (15-17.5)	MD01-2386	Broecker et al. (2008)		24.3589		1	1	1
1	130	2800	17135	133	15001	117	16450	90	1449	148	14151	850	117	2344	151.25	1951	3	HS1 (15-17.5)	MD01-2386	Broecker et al. (2008)		24.6863		1	1	1
1	130	2800	17239	140	15098	114	16900	80	1802	139	14148	950	114	2726	154.75	1951	3	HS1 (15-17.5)	MD01-2386	Broecker et al. (2008)		25.9876		1	1	1
1	130	2800	18056.5	173	15760	147	17550	90	1790	172	14707	1053	147	2832	215.25	1951	3		MD01-2386	Broecker et al. (2008)		26.1956		1	1	1
1	130	2800	18689	119	16338	105	17850	60	1512	121	15339	999	105	2513	169	1951	3		MD01-2386	Broecker et al. (2008)		26.6467		1	1	1
1	130	2800	19232	132	16849	111	18550	65	1701	129	15965	884	111	2601	121	1951	3	LGM (19-21.8)	MD01-2386	Broecker et al. (2008)		27.1943		1	1	1
18.25	57.66	596	8890	520	NaN	NaN	9115	20	NaN	NaN	7966	NaN	NaN	1124	324	837	5	EHOL (7-11)	RC27-14	Bryan et al. (2010)		15.2542		1	1	1
18.25	57.66	596	9480	540	NaN	NaN	10540	25	NaN	NaN	8452	NaN	NaN	2043	347	837	5	EHOL (7-11)	RC27-14	Bryan et al. (2010)		16.6667		1	1	1
18.25	57.66	596	9510	540	NaN	NaN	11045	25	NaN	NaN	8487	NaN	NaN	2450	307.5	837	5	EHOL (7-11)	RC27-14	Bryan et al. (2010)		15.4412		1	1	1
18.25	57.66	596	10190	240	NaN	NaN	10105	25	NaN	NaN	8986	NaN	NaN	1107	173.75	837	5	EHOL (7-11)	RC27-14	Bryan et al. (2010)		15.1515		1	1	1
18.25	57.66	596	10850	210	NaN	NaN	13130	30	NaN	NaN	9581	NaN	NaN	3568	147.25	837	5	EHOL (7-11)	RC27-14	Bryan et al. (2010)		15.2542		1	1	1
18.25	57.66	596	11440	190	NaN	NaN	11425	25	NaN	NaN	10021	NaN	NaN	1418	141.75	837	5		RC27-14	Bryan et al. (2010)		13.253		1	1	1
18.25	57.66	596	12270	210	NaN	NaN	11975	30	NaN	NaN	10392	NaN	NaN	1597	113.25	837	5	YD (11.8-12.7)	RC27-14	Bryan et al. (2010)		12.6761		1	1	1
18.25	57.66	596	12980	240	NaN	NaN	12980	25	NaN	NaN	11047	NaN	NaN	1930	205.5	837	5	BA (12.8-14.8)	RC27-14	Bryan et al. (2010)		12.5		1	1	1
18.25	57.66	596	13140	250	NaN	NaN	12980	40	NaN	NaN	11240	NaN	NaN	1720	261	837	5	BA (12.8-14.8)	RC27-14	Bryan et al. (2010)		12.6984		1	1	1
18.25	57.66	596	13770	220	NaN	NaN	12725	25	NaN	NaN	11889	NaN	NaN	823	206.5	837	5	BA (12.8-14.8)	RC27-14	Bryan et al. (2010)		12.5		1	1	1
18.25	57.66	596	13890	210	NaN	NaN	13450	30	NaN	NaN	12065	NaN	NaN	1428	184.5	837	5	BA (12.8-14.8)	RC27-14	Bryan et al. (2010)		12.8378		1	1	1
18.25	57.66	596	14630	200	NaN	NaN	14435	35	NaN	NaN	12476	NaN	NaN	1996	83.75	837	5	BA (12.8-14.8)	RC27-14	Bryan et al. (2010)		14.4737		1	1	1
18.25	57.66	596	15010	200	NaN	NaN	14950	30	NaN	NaN	12604	NaN	NaN	2351	141.75	837	5	HS1 (15-17.5)	RC27-14	Bryan et al. (2010)		14.5161		1	1	1
18.25	57.66	596	15320	200	NaN	NaN	15180	30	NaN	NaN	12856	NaN	NaN	2332	149.75	837	5	HS1 (15-17.5)	RC27-14	Bryan et al. (2010)		14.7059		1	1	1
18.25	57.66	596	16000	240	NaN	NaN	15535	35	NaN	NaN	13309	NaN	NaN	2220	176.25	837	5	HS1 (15-17.5)	RC27-14	Bryan et al. (2010)		14.5161		1	1	1
18.25	57.66	596	16620	280	NaN	NaN	16060	35	NaN	NaN	13741	NaN	NaN	2319	175.25	837	5	HS1 (15-17.5)	RC27-14	Bryan et al. (2010)		14.6667		1	1	1
18.25	57.66	596	17370	340	NaN	NaN	15900	35	NaN	NaN	14280	NaN	NaN	1596	236	837	5	HS1 (15-17.5)	RC27-14	Bryan et al. (2010)		14.4928		1	1	1
18.25	57.66	596	18060	400	NaN	NaN	16220	40	NaN	NaN	14708	NaN	NaN	1497	341.75	837	5		RC27-14	Bryan et al. (2010)		14.6341		1	1	1
18.25	57.66	596	18470	370	NaN	NaN	17470	45	NaN	NaN	15190	NaN	NaN	2277	363	837	5		RC27-14	Bryan et al. (2010)		14.8148		1	1	1
18.25	57.66	596	18740	350	NaN	NaN	17190	45	NaN	NaN	15402	NaN	NaN	1763	289.25	837	5	LGM (19-21.8)	RC27-14	Bryan et al. (2010)		14.6018		1	1	1
18.25	57.66	596	21000	290	NaN	NaN	18530	45	NaN	NaN	17462	NaN	NaN	1073	228.5	837	5	LGM (19-21.8)	RC27-14	Bryan et al. (2010)		13.41		1	1	1
18.25	57.66	596	23610	200	NaN	NaN	21870	70	NaN	NaN	19436	NaN	NaN	2341	201.5	837	5		RC27-14	Bryan et al. (2010)		10.8812		1	1	1
17.99	57.59	820	8630	500	NaN	NaN	9505	20	NaN	NaN	7854	NaN	NaN	1611	385.75	933	5	EHOL (7-11)	RC27-23	Bryan et al. (2010)		12.987		1	1	1
17.99	57.59	820	9400	510	NaN	NaN	10525	25	NaN	NaN	8311	NaN	NaN	2147	344.25	933	5	EHOL (7-11)	RC27-23	Bryan et al. (2010)		13.1579		1	1	1
17.99	57.59	820	9780	520	NaN	NaN	10210	20	NaN	NaN	8796	NaN	NaN	1416	115	933	5	EHOL (7-11)	RC27-23	Bryan et al. (2010)		12.8205		1	1	1
17.99	57.59	820	10170	250	NaN	NaN	11170	30	NaN	NaN	8936	NaN	NaN	2203	179.75	933	5	EHOL (7-11)	RC27-23	Bryan et al. (2010)		12.8205		1	1	1
17.99	57.59	820	10560	230	NaN	NaN	10755	25	NaN	NaN	9326	NaN	NaN	1402	138.75	933	5	EHOL (7-11)	RC27-23	Bryan et al. (2010)		13.1579		1	1	1
17.99	57.59	820	10940	220	NaN	NaN	12835	25	NaN	NaN	9609	NaN	NaN	3246	133.75	933	5	EHOL (7-11)	RC27-23	Bryan et al. (2010)		12.8205		1	1	1
17.99	57.59	820	11330	210	NaN	NaN	11965	30	NaN	NaN	9956	NaN	NaN	2013	148.25	933	5		RC27-23	Bryan et al. (2010)		12.5		1	1	1
17.99	57.59	820	11730	210	NaN	NaN	12255	25	NaN	NaN	10091	NaN	NaN	2146	109	933	5	YD (11.8-12.7)	RC27-23	Bryan et al. (2010)		12.1951		1	1	1
17.99	57.59	820	12140	220	NaN	NaN	12420	25	NaN	NaN	10355	NaN	NaN	2069	115.75	933	5	YD (11.8-12.7)	RC27-23	Bryan et al. (2010)		11.9048		1	1	1
17.99	57.59	820	12560	230	NaN	NaN	12590	25	NaN	NaN	10472	NaN	NaN	2065	117	933	5	YD (11.8-12.7)	RC27-23	Bryan et al. (2010)		11.9048		1	1	1
17.99	57.59	820	12980	250	NaN	NaN	13325	30	NaN	NaN	11047	NaN	NaN	2274	289.75	933	5	BA (12.8-14.8)	RC27-23	Bryan et al. (2010)		12.1951		1	1	1
17.99	57.59	820	13390	240	NaN	NaN	13365	30	NaN	NaN	11511	NaN	NaN	1837	188.5	933	5	BA (12.8-14.8)	RC27-23	Bryan et al. (2010)		11.9048		1	1	1
17.99	57.59	820	13810	210	NaN	NaN	12930	30	NaN	NaN	12013	NaN	NaN	961	190.5	933	5	BA (12.8-14.8)	RC27-23	Bryan et al. (2010)		11.9048		1	1	1
17.99	57.59	820	14230	200	NaN	NaN	13315	25	NaN	NaN	12316	NaN	NaN	1004	127.5	933	5	BA (12.8-14.8)	RC27-23	Bryan et al. (2010)		11.9048		1	1	1
17.99	57.59	820	14650	200	NaN	NaN	15595	40	NaN	NaN	12480	NaN	NaN	3152	87.75	933	5	BA (12.8-14.8)	RC27-23	Bryan et al. (2010)		10.5263		1	1	1
17.99	57.59	820	15600	220	NaN	NaN	16165	50	NaN	NaN	13012	NaN	NaN	3143	163.75	933	5	HS1 (15-17.5)	RC27-23	Bryan et al. (2010)		10.4167		1	1	1
17.99	57.59	820	16080	250	NaN	NaN	15890	35	NaN	NaN	13368	NaN	NaN	2521	180.25	933	5	HS1 (15-17.5)	RC27-23	Bryan et al. (2010)		10.4167		1	1	1
17.99	57.59	820	16560	280	NaN	NaN	15980	30	NaN	NaN	13694	NaN	NaN	2279	184.75	933	5	HS1 (15-17.5)	RC27-23	Bryan et al. (2010)		5.2356		1	1	1
17.99	57.59	820	18470	400	NaN	NaN	16450	35	NaN	NaN	15190	NaN	NaN	1256	364	933	5		RC27-23	Bryan et al. (2010)		31.9149		1	1	1
17.99	57.59	820	18940	360	NaN	NaN	17015	35	NaN	NaN	15706	NaN	NaN	1299	301.5	933	5	LGM (19-21.8)	RC27-23	Bryan et al. (2010)		10.4167		1	1	1
17.99	57.59	820	19420	340	NaN	NaN	17440	35	NaN	NaN	16048	NaN	NaN	1369	294.25	933	5	LGM (19-21.8)	RC27-23	Bryan et al. (2010)		10.4167		1	1	1
17.99	57.59	820	19900	320	NaN	NaN	17995	40	NaN	NaN	16488	NaN	NaN	1504	262.25	933	5	LGM (19-21.8)	RC27-23	Bryan et al. (2010)		9.66184		1	1	1
17.99	57.59	820	21970	320	NaN	NaN	18940	60	NaN	NaN	18003	NaN	NaN	915	286.5	933	5	LGM (19-21.8)	RC27-23	Bryan et al. (2010)		11.9254		1	1	1
-54.485	-62.214	318	13397	38	NaN	NaN	12750	90	NaN	NaN	11512	NaN	NaN	1224	96.75	1034	8	BA (12.8-14.8)	LMG06-05-9_1	Burke and Robinson (2012)		NaN		1	1	1
-54.485	-62.214	318	13707	34	NaN	NaN	13150	90	NaN	NaN	11823	NaN	NaN	1319	94.25	1034	8	BA (12.8-14.8)	LMG06-05-9_3	Burke and Robinson (2012)		NaN		1	1	1
-60.182	-57.834	819	25647	161	NaN	NaN	23600	520	NaN	NaN	21214	NaN	NaN	2329	545.5	1252	8	preLGM (25-30)	NBP0805-DR23_Dc-A-1	Burke and Robinson (2012)		NaN		1	1	1
-60.182	-57.834	819	35466	153	NaN	NaN	32700	1600	NaN	NaN	31163	NaN	NaN	1565	783.5	1252	8		NBP0805-DR23_Dc-A-2	Burke and Robinson (2012)		NaN		1	1	1
-60.182	-57.834	819	39253	150.5	NaN	NaN	35900	2300	NaN	NaN	34031	NaN	NaN	1864	932.5	1252	8		NBP0805-DR23_Dc-A-3	Burke and Robinson (2012)		NaN		1	1	1
-60.182	-57.834	819	20330	172.5	NaN	NaN	18550	280	NaN	NaN	16803	NaN	NaN	1733	315	1252	8	LGM (19-21.8)	NBP0805-DR23_Dc-A-4	Burke and Robinson (2012)		NaN		1	1	1
-60.182	-57.834	819	13187	77	NaN	NaN	12400	160	NaN	NaN	11350	NaN	NaN	1097	188.5	1252	8	BA (12.8-14.8)	NBP0805-DR23_Dc-A-5	Burke and Robinson (2012)		NaN		1	1	1
-60.182	-57.834	819	15688	50	NaN	NaN	14900	200	NaN	NaN	13087	NaN	NaN	1812	203.25	1252	8	HS1 (15-17.5)	NBP0805-DR23_Dc-A-6	Burke and Robinson (2012)		NaN		1	1	1
-60.182	-57.834	819	11911	62.5	NaN	NaN	11250	130	NaN	NaN	10212	NaN	NaN	1017	137	1252	8	YD (11.8-12.7)	NBP0805-DR23_Dc-A-7	Burke and Robinson (2012)		NaN		1	1	1
-60.547	-65.949	1134	21524	110	NaN	NaN	19450	330	NaN	NaN	17813	NaN	NaN	1676	333	1259	8	LGM (19-21.8)	NBP0805-DR27_Dc-A-1	Burke and Robinson (2012)		NaN		1	1	1
-59.733	-68.743	869	6858	34.5	NaN	NaN	7160	95	NaN	NaN	6022.6	NaN	NaN	1143	97.75	1198	8		NBP0805-DR34_Dc-A-1	Burke and Robinson (2012)		NaN		1	1	1
-59.733	-68.743	869	5819	33	NaN	NaN	6290	95	NaN	NaN	5066.8	NaN	NaN	1228	96.25	1198	8	HOL (<6)	NBP0805-DR34_Dc-A-2	Burke and Robinson (2012)		NaN		1	1	1
-59.723	-68.881	695	1708	14	NaN	NaN	2730	75	NaN	NaN	1797	NaN	NaN	934	82.75	1151	8	HOL (<6)	NBP0805-DR35_Dc-A-1	Burke and Robinson (2012)		NaN		1	1	1
-59.723	-68.881	695	1749	17	NaN	NaN	2730	75	NaN	NaN	1881	NaN	NaN	862	77	1151	8	HOL (<6)	NBP0805-DR35_Dc-A-1	Burke and Robinson (2012)		NaN		1	1	1
-59.723	-68.881	695	14710	47.5	NaN	NaN	13450	170	NaN	NaN	12427	NaN	NaN	1021	176	1151	8	BA (12.8-14.8)	NBP0805-DR35_Dc-A-2a	Burke and Robinson (2012)		NaN		1	1	1
-59.723	-68.881	695	11365	67.5	NaN	NaN	10550	130	NaN	NaN	9987	NaN	NaN	577	139.75	1151	8		NBP0805-DR35_Dc-A-2c	Burke and Robinson (2012)		NaN		1	1	1
-59.723	-68.881	695	11376	36	NaN	NaN	10800	130	NaN	NaN	9963	NaN	NaN	817	133	1151	8		NBP0805-DR35_Dc-B-1a	Burke and Robinson (2012)		NaN		1	1	1
-59.723	-68.881	695	11253	42	NaN	NaN	10600	140	NaN	NaN	9877.4	NaN	NaN	736	156.75	1151	8		NBP0805-DR35_Dc-B-1b	Burke and Robinson (2012)		NaN		1	1	1
-59.723	-68.881	695	11405	47	NaN	NaN	10750	140	NaN	NaN	10027	NaN	NaN	750	142.75	1151	8		NBP0805-DR35_Dc-C-1b	Burke and Robinson (2012)		NaN		1	1	1
-59.723	-68.881	695	11460	47.5	NaN	NaN	10750	140	NaN	NaN	10008	NaN	NaN	729	140.5	1151	8		NBP0805-DR35_Dc-C-1b	Burke and Robinson (2012)		NaN		1	1	1
-59.723	-68.881	695	7699	33.5	NaN	NaN	7890	130	NaN	NaN	6904.8	NaN	NaN	1006	137.25	1151	8	EHOL (7-11)	NBP0805-DR35_Dc-C-2	Burke and Robinson (2012)		NaN		1	1	1
-59.723	-68.881	695	11117	33	NaN	NaN	10600	130	NaN	NaN	9658	NaN	NaN	954	133	1151	8		NBP0805-DR35_Dc-D-1	Burke and Robinson (2012)		NaN		1	1	1
-59.723	-68.881	695	11142	34.5	NaN	NaN	10700	150	NaN	NaN	9656.2	NaN	NaN	1031	153.5	1151	8		NBP0805-DR35_Dc-D-3	Burke and Robinson (2012)		NaN		1	1	1
-59.723	-68.881	695	10144	31	NaN	NaN	9850	120	NaN	NaN	8900.6	NaN	NaN	936	125.75	1151	8	EHOL (7-11)	NBP0805-DR35_Dc-D-4	Burke and Robinson (2012)		NaN		1	1	1
-59.723	-68.881	695	10255	40.5	NaN	NaN	10100	170	NaN	NaN	9166	NaN	NaN	974	183.75	1151	8	EHOL (7-11)	NBP0805-DR35_Dc-D-5	Burke and Robinson (2012)		NaN		1	1	1
-59.723	-68.881	695	11664	85	NaN	NaN	10800	150	NaN	NaN	10087	NaN	NaN	724	154.25	1151	8		NBP0805-DR35_Dc-E-1	Burke and Robinson (2012)		NaN		1	1	1
-59.723	-68.881	695	11699	64.5	NaN	NaN	10800	150	NaN	NaN	10084	NaN	NaN	710	153	1151	8		NBP0805-DR35_Dc-E-1	Burke and Robinson (2012)		NaN		1	1	1
-59.707	-69.008	1750	10304	39.5	NaN	NaN	10050	110	NaN	NaN	9209.4	NaN	NaN	862	116	1326	8	EHOL (7-11)	NBP0805-DR36_Dc-A-1	Burke and Robinson (2012)		NaN		1	1	1
-59.707	-69.008	1750	12287	54	NaN	NaN	11550	140	NaN	NaN	10420	NaN	NaN	1161	139.75	1326	8	YD (11.8-12.7)	NBP0805-DR36_Dc-A-2	Burke and Robinson (2012)		NaN		1	1	1
-59.707	-69.008	1750	12798	61	NaN	NaN	11900	150	NaN	NaN	10910	NaN	NaN	1006	180.25	1326	8	BA (12.8-14.8)	NBP0805-DR36_Dc-A-3	Burke and Robinson (2012)		NaN		1	1	1
-59.743	-68.898	978	11608	65.5	NaN	NaN	10800	130	NaN	NaN	10036	NaN	NaN	749	132	1198	8		NBP0805-DR38_Dc-A-1	Burke and Robinson (2012)		NaN		1	1	1
-59.732	-68.933	1323	1144	27	NaN	NaN	2120	70	NaN	NaN	1217	NaN	NaN	903	75.75	1248	8	HOL (<6)	NBP0805-DR40_Dc-A-1	Burke and Robinson (2012)		NaN		1	1	1
-54.734	-62.216	816	468	10.5	NaN	NaN	1380	60	NaN	NaN	369	NaN	NaN	1006	60.5	1168	8	HOL (<6)	NBP0805-TB04_BigBeautyA	Burke and Robinson (2012)		NaN		1	1	1
-54.734	-62.216	816	16402	155	NaN	NaN	14200	180	NaN	NaN	13603	NaN	NaN	607	208.25	1168	8	HS1 (15-17.5)	NBP0805-TB04_Dn-A-10	Burke and Robinson (2012)		NaN		1	1	1
-54.734	-62.216	816	4643	84.5	NaN	NaN	4850	75	NaN	NaN	4137	NaN	NaN	720	90.5	1168	8	HOL (<6)	NBP0805-TB04_Dn-A-11	Burke and Robinson (2012)		NaN		1	1	1
-54.734	-62.216	816	5883	26.5	NaN	NaN	5990	90	NaN	NaN	5056.6	NaN	NaN	909	100.75	1168	8	HOL (<6)	NBP0805-TB04_Dn-A-13	Burke and Robinson (2012)		NaN		1	1	1
-54.734	-62.216	816	11777	67.5	NaN	NaN	10700	140	NaN	NaN	10145	NaN	NaN	562	146.5	1168	8	YD (11.8-12.7)	NBP0805-TB04_Dn-B-4	Burke and Robinson (2012)		NaN		1	1	1
-54.734	-62.216	816	6470	24	NaN	NaN	6430	95	NaN	NaN	5687	NaN	NaN	736	98.25	1168	8		NBP0805-TB04_Dn-D-6	Burke and Robinson (2012)		NaN		1	1	1
-54.734	-62.216	816	66	5.5	NaN	NaN	870	70	NaN	NaN	115	NaN	NaN	753	69.25	1168	8	HOL (<6)	NBP0805-TB04_Dp-A-3	Burke and Robinson (2012)		NaN		1	1	1
-54.734	-62.216	816	9	39	NaN	NaN	805	65	NaN	NaN	174	NaN	NaN	632	65.75	1168	8	HOL (<6)	NBP0805-TB04_Modern Balano-1	Burke and Robinson (2012)		NaN		1	1	1
50.43	-46.37	1600	13375	123	NaN	NaN	11820	40	NaN	NaN	11523	NaN	NaN	310	143.75	557	1	BA (12.8-14.8)	OK 3	Cao et al. (2007)		NaN		1	1	1
50.43	-46.37	1600	13098	203	NaN	NaN	11760	45	NaN	NaN	11178	NaN	NaN	579	226.5	557	1	BA (12.8-14.8)	OK 8	Cao et al. (2007)		NaN		1	1	1
50.43	-46.37	1600	12886	132	NaN	NaN	11655	35	NaN	NaN	10975	NaN	NaN	664	155.75	557	1	BA (12.8-14.8)	OKB 36A	Cao et al. (2007)		NaN		1	1	1
50.43	-46.37	1600	13847	98	NaN	NaN	12270	30	NaN	NaN	12012	NaN	NaN	265	91	557	1	BA (12.8-14.8)	OKB 53B	Cao et al. (2007)		NaN		1	1	1
50.43	-46.37	1600	13401	114	NaN	NaN	12140	30	NaN	NaN	11515	NaN	NaN	608	131.75	557	1	BA (12.8-14.8)	OKB B3	Cao et al. (2007)		NaN		1	1	1
-54.8087	-62.12	1419	14011	103	NaN	NaN	13277.5	71.3112	NaN	NaN	12048	NaN	NaN	1182.37	121.75	1250	8	BA (12.8-14.8)	BurdwoodBank1	Chen et al. (2015)		NaN		1	1	1
-54.8095	-62.167	1516	15761	144.5	NaN	NaN	14736.2	65.3907	NaN	NaN	13145	NaN	NaN	1590.3	127.75	1295	8	HS1 (15-17.5)	BurdwoodBank2	Chen et al. (2015)		NaN		1	1	1
9	-21.31	973	11400	52	NaN	NaN	10695.4	25.854	NaN	NaN	10003	NaN	NaN	697.817	47.5	838	1		EBA1	Chen et al. (2015)		NaN		1	1	1
9	-21.31	973	11480	66.5	NaN	NaN	10728.9	29.0165	NaN	NaN	10019	NaN	NaN	704.719	44	838	1		EBA1	Chen et al. (2015)		NaN		1	1	1
9	-21.31	973	14759	80.5	NaN	NaN	13417.1	34.1467	NaN	NaN	12364	NaN	NaN	979.652	68	838	1	BA (12.8-14.8)	EBA1	Chen et al. (2015)		NaN		1	1	1
9	-21.31	1829	10646	34.5	NaN	NaN	10148.6	24.153	NaN	NaN	9392	NaN	NaN	731.113	42	764	1	EHOL (7-11)	EBA10	Chen et al. (2015)		NaN		1	1	1
9	-21.31	1829	14819	42	NaN	NaN	14056.5	36.9758	NaN	NaN	12447	NaN	NaN	1609.79	68	764	1	BA (12.8-14.8)	EBA10	Chen et al. (2015)		NaN		1	1	1
9	-21.31	1829	16517	87	NaN	NaN	15212.8	42.7003	NaN	NaN	13662	NaN	NaN	1544.83	79.25	764	1	HS1 (15-17.5)	EBA10	Chen et al. (2015)		NaN		1	1	1
9	-21.31	1829	17367	118	NaN	NaN	15725.2	51.2018	NaN	NaN	14275	NaN	NaN	1440.2	122.25	764	1	HS1 (15-17.5)	EBA10	Chen et al. (2015)		NaN		1	1	1
9	-21.31	2100	11785	91	NaN	NaN	10873.7	26.4346	NaN	NaN	10133	NaN	NaN	732.393	67.75	800	1	YD (11.8-12.7)	EBA11	Chen et al. (2015)		NaN		1	1	1
9	-21.31	1080	13234	82	NaN	NaN	12314.1	31.626	NaN	NaN	11349	NaN	NaN	952.847	107	829	1	BA (12.8-14.8)	EBA2	Chen et al. (2015)		NaN		1	1	1
9	-21.31	1080	14289	76.5	NaN	NaN	13107.3	30.8014	NaN	NaN	12334	NaN	NaN	762.3	58	829	1	BA (12.8-14.8)	EBA2	Chen et al. (2015)		NaN		1	1	1
9	-21.31	1080	14516	52	NaN	NaN	13140.2	30.9279	NaN	NaN	12428	NaN	NaN	709.957	45.25	829	1	BA (12.8-14.8)	EBA2	Chen et al. (2015)		NaN		1	1	1
9	-21.31	1080	17153	89.5	NaN	NaN	15175.6	42.5026	NaN	NaN	14158	NaN	NaN	1044.53	95.5	829	1	HS1 (15-17.5)	EBA2	Chen et al. (2015)		NaN		1	1	1
9	-21.31	1080	17818	78	NaN	NaN	15662.9	45.1609	NaN	NaN	14534	NaN	NaN	1122.28	88.75	829	1		EBA2	Chen et al. (2015)		NaN		1	1	1
9	-21.31	1413	11552	44	NaN	NaN	10999.1	28.4298	NaN	NaN	10030	NaN	NaN	964.812	38.7501	786	1		EBA3	Chen et al. (2015)		NaN		1	1	1
9	-21.31	1366	14516	56.5	NaN	NaN	13219	33.3147	NaN	NaN	12428	NaN	NaN	787.824	47.5	786	1	BA (12.8-14.8)	EBA4	Chen et al. (2015)		NaN		1	1	1
9	-21.31	1366	14893	70.5	NaN	NaN	13455.6	34.3107	NaN	NaN	12508	NaN	NaN	946.519	76.9999	786	1		EBA4	Chen et al. (2015)		NaN		1	1	1
9	-21.31	1366	15069	94.5	NaN	NaN	13681.8	35.2905	NaN	NaN	12636	NaN	NaN	1039.89	87.5	786	1	HS1 (15-17.5)	EBA4	Chen et al. (2015)		NaN		1	1	1
9	-21.31	1366	25287	87	NaN	NaN	22182.7	95.3283	NaN	NaN	21030	NaN	NaN	1162.45	142.5	786	1	preLGM (25-30)	EBA4	Chen et al. (2015)		NaN		1	1	1
9	-21.31	1354	14846	72	NaN	NaN	13598.4	37.109	NaN	NaN	12483	NaN	NaN	1122.33	76.7501	786	1	BA (12.8-14.8)	EBA5	Chen et al. (2015)		NaN		1	1	1
9	-21.31	1380	15925	86.5	NaN	NaN	14606.5	39.5958	NaN	NaN	13254	NaN	NaN	1346.52	78.5	786	1	HS1 (15-17.5)	EBA6	Chen et al. (2015)		NaN		1	1	1
9	-21.31	1366	15952	72	NaN	NaN	14537.5	41.7108	NaN	NaN	13269	NaN	NaN	1260.37	72.5	786	1	HS1 (15-17.5)	EBA7	Chen et al. (2015)		NaN		1	1	1
9	-21.31	1431	16446	66	NaN	NaN	14981.3	38.8944	NaN	NaN	13625	NaN	NaN	1356.4	67	786	1	HS1 (15-17.5)	EBA8	Chen et al. (2015)		NaN		1	1	1
9	-21.31	1545	14609	74	NaN	NaN	13404.3	31.9615	NaN	NaN	12470	NaN	NaN	949.708	51.9999	753	1	BA (12.8-14.8)	EBA9	Chen et al. (2015)		NaN		1	1	1
9	-21.31	1545	14967	52.5	NaN	NaN	13770.5	40.1427	NaN	NaN	12560	NaN	NaN	1208.09	66	753	1	HS1 (15-17.5)	EBA9	Chen et al. (2015)		NaN		1	1	1
9	-21.31	1545	15378	53.5	NaN	NaN	14281.5	38.026	NaN	NaN	12895	NaN	NaN	1391.26	62.5	753	1	HS1 (15-17.5)	EBA9	Chen et al. (2015)		NaN		1	1	1
9	-21.31	1545	15451	51.5	NaN	NaN	14382	38.5045	NaN	NaN	12915	NaN	NaN	1461.92	59.75	753	1	HS1 (15-17.5)	EBA9	Chen et al. (2015)		NaN		1	1	1
6	-27	749	267	49.5	NaN	NaN	1204.09	15.3978	NaN	NaN	163	NaN	NaN	1023.11	51.25	838	1	HOL (<6)	EBB1	Chen et al. (2015)		NaN		1	1	1
6	-27	845	733	64	NaN	NaN	1636.39	19.2036	NaN	NaN	853	NaN	NaN	792.356	61.75	860	1	HOL (<6)	EBB2	Chen et al. (2015)		NaN		1	1	1
6	-27	845	21088	63	NaN	NaN	18306.2	58.8354	NaN	NaN	17523	NaN	NaN	786.797	80	860	1	LGM (19-21.8)	EBB2	Chen et al. (2015)		NaN		1	1	1
6	-27	845	23781	102.5	NaN	NaN	20617.1	62.7578	NaN	NaN	19699	NaN	NaN	905.523	189.5	860	1		EBB2	Chen et al. (2015)		NaN		1	1	1
6	-27	1162	16980	72	NaN	NaN	15080.5	42.0026	NaN	NaN	13926	NaN	NaN	1145.46	94.2499	834	1	HS1 (15-17.5)	EBB3	Chen et al. (2015)		NaN		1	1	1
6	-27	1264	15955	59.5	NaN	NaN	14362.7	38.4124	NaN	NaN	13272	NaN	NaN	1084.61	65.5	783	1	HS1 (15-17.5)	EBB4	Chen et al. (2015)		NaN		1	1	1
6	-27	1264	16458	113.5	NaN	NaN	15007.3	36.419	NaN	NaN	13631	NaN	NaN	1375.13	92.75	783	1	HS1 (15-17.5)	EBB4	Chen et al. (2015)		NaN		1	1	1
6	-27	1966	2267	11.5	NaN	NaN	2842.25	16.5924	NaN	NaN	2187	NaN	NaN	654.327	26.75	760	1	HOL (<6)	EBB5	Chen et al. (2015)		NaN		1	1	1
6	-27	1966	12850	42.5	NaN	NaN	11823.4	28.0017	NaN	NaN	10989	NaN	NaN	863.372	52.5	760	1	BA (12.8-14.8)	EBB5	Chen et al. (2015)		NaN		1	1	1
6	-27	1966	14180	45	NaN	NaN	13017.5	30.4588	NaN	NaN	12287	NaN	NaN	731.879	47.75	760	1	BA (12.8-14.8)	EBB5	Chen et al. (2015)		NaN		1	1	1
6	-27	1966	16176	74	NaN	NaN	15149	42.3626	NaN	NaN	13421	NaN	NaN	1724.41	72.75	760	1	HS1 (15-17.5)	EBB5	Chen et al. (2015)		NaN		1	1	1
6	-27	1985	2273	10.5	NaN	NaN	2874.36	17.8077	NaN	NaN	2172	NaN	NaN	694.279	27	760	1	HOL (<6)	EBB6	Chen et al. (2015)		NaN		1	1	1
6	-27	1985	13429	29	NaN	NaN	12325.3	27.9441	NaN	NaN	11540	NaN	NaN	779.835	48.75	760	1	BA (12.8-14.8)	EBB6	Chen et al. (2015)		NaN		1	1	1
6	-27	1985	14172	43	NaN	NaN	12981	28.2994	NaN	NaN	12280	NaN	NaN	700.005	46.25	760	1	BA (12.8-14.8)	EBB6	Chen et al. (2015)		NaN		1	1	1
6	-27	1985	14221	47.5	NaN	NaN	13132	28.8364	NaN	NaN	12312	NaN	NaN	823.629	47	760	1	BA (12.8-14.8)	EBB6	Chen et al. (2015)		NaN		1	1	1
6	-27	1985	14388	27.5	NaN	NaN	13239.8	35.4888	NaN	NaN	12396	NaN	NaN	842.932	42.25	760	1	BA (12.8-14.8)	EBB6	Chen et al. (2015)		NaN		1	1	1
6	-27	2814	10382	24.5	NaN	NaN	9863.91	23.3119	NaN	NaN	9219.6	NaN	NaN	645.795	34.75	896	1	EHOL (7-11)	EBB7	Chen et al. (2015)		NaN		1	1	1
15.5	-51	1492	6798	34.5	NaN	NaN	6450.19	19.7239	NaN	NaN	5995.4	NaN	NaN	471.955	40.75	722	1		GRM1	Chen et al. (2015)		NaN		1	1	1
15.5	-51	1544	13972	46.5	NaN	NaN	12848.7	33.8022	NaN	NaN	12003	NaN	NaN	812.662	62.25	722	1	BA (12.8-14.8)	GRM2	Chen et al. (2015)		NaN		1	1	1
-60.5625	-65.9567	983	15170	88	NaN	NaN	14061.2	55.4957	NaN	NaN	12723	NaN	NaN	1339.21	97	1245	8	HS1 (15-17.5)	InterimSeamount1	Chen et al. (2015)		NaN		1	1	1
-60.6055	-66.0022	1064	14714	122	NaN	NaN	13546.2	67.2308	NaN	NaN	12419	NaN	NaN	1097.89	89.25	1252	8	BA (12.8-14.8)	InterimSeamount2	Chen et al. (2015)		NaN		1	1	1
-60.6	-66	1196	15221	72.5	NaN	NaN	13941.8	56.9555	NaN	NaN	12759	NaN	NaN	1178.27	90.7501	1259	8	HS1 (15-17.5)	InterimSeamount3	Chen et al. (2015)		NaN		1	1	1
-60.6	-66	1196	16176	57.5	NaN	NaN	15012.5	67.6792	NaN	NaN	13421	NaN	NaN	1587.73	82.75	1259	8	HS1 (15-17.5)	InterimSeamount3	Chen et al. (2015)		NaN		1	1	1
-60.6	-66	1196	25896	109	NaN	NaN	23506.2	164.856	NaN	NaN	21599	NaN	NaN	1886.65	259.75	1259	8	preLGM (25-30)	InterimSeamount3	Chen et al. (2015)		NaN		1	1	1
-59.7637	-68.9333	981	14143	81	NaN	NaN	13319.5	65.3604	NaN	NaN	12257	NaN	NaN	1065.94	108.25	1198	8	BA (12.8-14.8)	SarsSeamount1	Chen et al. (2015)		NaN		1	1	1
-59.7637	-68.9333	981	14177	121.5	NaN	NaN	13086.8	55.3011	NaN	NaN	12284	NaN	NaN	809.794	119.5	1198	8	BA (12.8-14.8)	SarsSeamount1	Chen et al. (2015)		NaN		1	1	1
-59.7637	-68.9333	981	14609	74	NaN	NaN	13546.2	67.2308	NaN	NaN	12470	NaN	NaN	1092.89	77.75	1198	8	BA (12.8-14.8)	SarsSeamount1	Chen et al. (2015)		NaN		1	1	1
-59.7637	-68.9333	981	14889	79.5	NaN	NaN	13468.5	66.5837	NaN	NaN	12507	NaN	NaN	962.666	97.5001	1198	8		SarsSeamount1	Chen et al. (2015)		NaN		1	1	1
-59.7637	-68.9333	981	16851	168	NaN	NaN	15456.7	79.7798	NaN	NaN	13844	NaN	NaN	1596.89	148.5	1198	8	HS1 (15-17.5)	SarsSeamount1	Chen et al. (2015)		NaN		1	1	1
-59.7985	-68.9603	1701	12564	62	NaN	NaN	11708.7	58.6602	NaN	NaN	10472	NaN	NaN	1191.1	86.25	1326	8	YD (11.8-12.7)	SarsSeamount2	Chen et al. (2015)		NaN		1	1	1
-59.7985	-68.9603	1701	13113	65.5	NaN	NaN	12358.9	46.7687	NaN	NaN	11220	NaN	NaN	1156.19	105.5	1326	8	BA (12.8-14.8)	SarsSeamount2	Chen et al. (2015)		NaN		1	1	1
-59.7985	-68.9603	1701	13158	67	NaN	NaN	12358.9	24.3197	NaN	NaN	11244	NaN	NaN	1085.68	70.25	1326	8	BA (12.8-14.8)	SarsSeamount2	Chen et al. (2015)		NaN		1	1	1
-59.7985	-68.9603	1701	14051	81	NaN	NaN	13344.9	71.9121	NaN	NaN	12132	NaN	NaN	1205.76	117.5	1326	8	BA (12.8-14.8)	SarsSeamount2	Chen et al. (2015)		NaN		1	1	1
-59.7985	-68.9603	1701	14063	60.5	NaN	NaN	13421.4	57.6531	NaN	NaN	12159	NaN	NaN	1262.86	102.25	1326	8	BA (12.8-14.8)	SarsSeamount2	Chen et al. (2015)		NaN		1	1	1
-59.7985	-68.9603	1701	14103	57.5	NaN	NaN	13421.4	57.6531	NaN	NaN	12232	NaN	NaN	1202.86	96	1326	8	BA (12.8-14.8)	SarsSeamount2	Chen et al. (2015)		NaN		1	1	1
-59.7985	-68.9603	1701	14783	65.5	NaN	NaN	13757.1	53.4346	NaN	NaN	12386	NaN	NaN	1325.8	80	1326	8	BA (12.8-14.8)	SarsSeamount2	Chen et al. (2015)		NaN		1	1	1
-60.1817	-57.8333	806	18047	168.5	NaN	NaN	16564	104.202	NaN	NaN	14703	NaN	NaN	1851.99	217.5	1252	8		ShackletonFractureZone1	Chen et al. (2015)		NaN		1	1	1
-60.1817	-57.8333	806	22578	81	NaN	NaN	20754.2	106.397	NaN	NaN	18739	NaN	NaN	2029.27	138	1252	8		ShackletonFractureZone1	Chen et al. (2015)		NaN		1	1	1
-60.1817	-57.8333	823	19631	189	NaN	NaN	18120.1	111.144	NaN	NaN	16360	NaN	NaN	1824.61	194	1252	8	LGM (19-21.8)	ShackletonFractureZone2	Chen et al. (2015)		NaN		1	1	1
-60.1817	-57.8333	823	20367	58	NaN	NaN	18959.6	89.3501	NaN	NaN	16830	NaN	NaN	2126.1	108.25	1252	8	LGM (19-21.8)	ShackletonFractureZone2	Chen et al. (2015)		NaN		1	1	1
-60.1817	-57.8333	823	27159	122	NaN	NaN	24946.9	170.343	NaN	NaN	22735	NaN	NaN	2177.43	265	1252	8	preLGM (25-30)	ShackletonFractureZone2	Chen et al. (2015)		NaN		1	1	1
15	-48	795	10414	80	NaN	NaN	9795.64	24.4743	NaN	NaN	9237.4	NaN	NaN	558.898	61.25	778	1	EHOL (7-11)	VAY1	Chen et al. (2015)		NaN		1	1	1
15	-48	795	12449	55.5	NaN	NaN	11174.8	24.2152	NaN	NaN	10379	NaN	NaN	774.601	68.5	778	1	YD (11.8-12.7)	VAY1	Chen et al. (2015)		NaN		1	1	1
15	-48	795	14938	50.5	NaN	NaN	13464.2	30.054	NaN	NaN	12532	NaN	NaN	925.668	58.7499	778	1		VAY1	Chen et al. (2015)		NaN		1	1	1
15	-48	795	23008	157.5	NaN	NaN	20219.2	64.702	NaN	NaN	19123	NaN	NaN	1091.17	191.5	778	1		VAY1	Chen et al. (2015)		NaN		1	1	1
15	-48	1612	692	8.5	NaN	NaN	1463.95	16.386	NaN	NaN	803	NaN	NaN	666.086	25	736	1	HOL (<6)	VAY1	Chen et al. (2015)		NaN		1	1	1
15	-48	1827	13369	61.5	NaN	NaN	12181.3	29.2774	NaN	NaN	11524	NaN	NaN	674.491	76.5	737	1	BA (12.8-14.8)	VAY2	Chen et al. (2015)		NaN		1	1	1
11	-45	1146	12039	51	NaN	NaN	10889.3	26.4858	NaN	NaN	10315	NaN	NaN	566.445	42	819	1	YD (11.8-12.7)	VEM1	Chen et al. (2015)		NaN		1	1	1
11	-45	1097	18614	82.5	NaN	NaN	16420	46.5232	NaN	NaN	15174	NaN	NaN	1213.82	116.25	819	1		VEM2	Chen et al. (2015)		NaN		1	1	1
11	-45	1097	20106	106.5	NaN	NaN	17687.3	54.4733	NaN	NaN	16629	NaN	NaN	1052.61	101	819	1	LGM (19-21.8)	VEM2	Chen et al. (2015)		NaN		1	1	1
11	-45	1097	22311	84	NaN	NaN	19652.4	69.5699	NaN	NaN	18345	NaN	NaN	1298.68	139.75	819	1		VEM2	Chen et al. (2015)		NaN		1	1	1
11	-45	1097	22414	80.5	NaN	NaN	19450.9	76.8925	NaN	NaN	18516	NaN	NaN	934.93	150.5	819	1		VEM2	Chen et al. (2015)		NaN		1	1	1
11	-45	1296	372	29	NaN	NaN	1061.65	16.9608	NaN	NaN	334	NaN	NaN	729.041	26.5	779	1	HOL (<6)	VEM3	Chen et al. (2015)		NaN		1	1	1
11	-45	1327	474	30	NaN	NaN	1202.23	14.9278	NaN	NaN	380	NaN	NaN	819.947	54.5	779	1	HOL (<6)	VEM4	Chen et al. (2015)		NaN		1	1	1
11	-45	1296	11391	57.5	NaN	NaN	10455.6	25.0939	NaN	NaN	9959.4	NaN	NaN	463.698	49.25	779	1		VEM5	Chen et al. (2015)		NaN		1	1	1
11	-45	1296	12468	98	NaN	NaN	11334.5	29.6421	NaN	NaN	10417	NaN	NaN	898.118	78.5	779	1	YD (11.8-12.7)	VEM5	Chen et al. (2015)		NaN		1	1	1
11	-45	1657	8602	17.5	NaN	NaN	8405.73	19.4421	NaN	NaN	7855.6	NaN	NaN	565.306	43.75	752	1	EHOL (7-11)	VEM6	Chen et al. (2015)		NaN		1	1	1
11	-45	1657	10499	22	NaN	NaN	9996.65	25.0944	NaN	NaN	9283.2	NaN	NaN	710.704	47.25	752	1	EHOL (7-11)	VEM6	Chen et al. (2015)		NaN		1	1	1
11	-45	1657	11358	34	NaN	NaN	10592.6	30.0299	NaN	NaN	9985	NaN	NaN	622.302	46.5	752	1		VEM6	Chen et al. (2015)		NaN		1	1	1
11	-45	1657	11742	26.5	NaN	NaN	11068.9	28.6779	NaN	NaN	10105	NaN	NaN	957.128	42.4999	752	1		VEM6	Chen et al. (2015)		NaN		1	1	1
11	-45	1657	12149	25.5	NaN	NaN	11344.4	28.0298	NaN	NaN	10361	NaN	NaN	982.128	34.5	752	1	YD (11.8-12.7)	VEM6	Chen et al. (2015)		NaN		1	1	1
11	-45	1657	12238	28.5	NaN	NaN	11390.7	28.1918	NaN	NaN	10367	NaN	NaN	1001.81	37.4999	752	1	YD (11.8-12.7)	VEM6	Chen et al. (2015)		NaN		1	1	1
11	-45	1657	12291	75	NaN	NaN	11374.2	28.1337	NaN	NaN	10415	NaN	NaN	988.822	40.25	752	1	YD (11.8-12.7)	VEM6	Chen et al. (2015)		NaN		1	1	1
11	-45	1578	8962	18.5	NaN	NaN	8458.51	24.175	NaN	NaN	7961.6	NaN	NaN	484.758	38.75	752	1	EHOL (7-11)	VEM7	Chen et al. (2015)		NaN		1	1	1
11	-45	1648	10813	25	NaN	NaN	10103.3	24.0171	NaN	NaN	9588.8	NaN	NaN	521.136	37.25	752	1	EHOL (7-11)	VEM8	Chen et al. (2015)		NaN		1	1	1
9.216	-21.316	1080	5427	145	NaN	NaN	5425	59	NaN	NaN	4629.2	NaN	NaN	725	151	829	1	HOL (<6)	f0001carcs001	Chen et al. (2020)		NaN		1	1	1
9.216	-21.316	1080	15157	230	NaN	NaN	13747	78	NaN	NaN	12713	NaN	NaN	1031	177.75	829	1	HS1 (15-17.5)	f0001carcs016	Chen et al. (2020)		NaN		1	1	1
9.216	-21.316	1080	15983	284	NaN	NaN	14392	81	NaN	NaN	13294	NaN	NaN	1088	214.75	829	1	HS1 (15-17.5)	f0001carcs024	Chen et al. (2020)		NaN		1	1	1
9.216	-21.316	1080	12428	304	NaN	NaN	11329	67	NaN	NaN	10358	NaN	NaN	886	239	829	1	YD (11.8-12.7)	f0001carcs027	Chen et al. (2020)		NaN		1	1	1
9.216	-21.316	1080	16003	220	NaN	NaN	14435	81	NaN	NaN	13311	NaN	NaN	1119	176.75	829	1	HS1 (15-17.5)	f0001carcs044	Chen et al. (2020)		NaN		1	1	1
9.216	-21.316	1080	18654	198	NaN	NaN	16606	96	NaN	NaN	15268	NaN	NaN	1299	229.75	829	1		f0001carcs051	Chen et al. (2020)		NaN		1	1	1
9.216	-21.316	1080	15583	167	NaN	NaN	14128	83	NaN	NaN	12997	NaN	NaN	1118	145.75	829	1	HS1 (15-17.5)	f0001carcs061	Chen et al. (2020)		NaN		1	1	1
9.216	-21.316	1080	16801	138	NaN	NaN	14972	88	NaN	NaN	13827	NaN	NaN	1140	127.25	829	1	HS1 (15-17.5)	f0001carcs065	Chen et al. (2020)		NaN		1	1	1
0.459	-90.712	627	16581	92	NaN	NaN	15059	88	NaN	NaN	13711	NaN	NaN	1347	110.75	1104	4	HS1 (15-17.5)	MV1007-DO3-2-1	Chen et al. (2020)		NaN	Galápagos	1	1	1
0.459	-90.712	627	16622	92	NaN	NaN	15009	89	NaN	NaN	13742	NaN	NaN	1270	110.5	1104	4	HS1 (15-17.5)	MV1007-DO3-2-13	Chen et al. (2020)		NaN	Galápagos	1	1	1
0.459	-90.712	627	16672	109	NaN	NaN	15140	89	NaN	NaN	13775	NaN	NaN	1372	112.5	1104	4	HS1 (15-17.5)	MV1007-DO3-2-15	Chen et al. (2020)		NaN	Galápagos	1	1	1
0.459	-90.712	627	16383	106	NaN	NaN	14919	88	NaN	NaN	13590	NaN	NaN	1337	119	1104	4	HS1 (15-17.5)	MV1007-DO3-2-2	Chen et al. (2020)		NaN	Galápagos	1	1	1
0.459	-90.712	627	16535	93	NaN	NaN	15021	88	NaN	NaN	13674	NaN	NaN	1340	111.25	1104	4	HS1 (15-17.5)	MV1007-DO3-2-3	Chen et al. (2020)		NaN	Galápagos	1	1	1
0.459	-90.712	627	14458	92	NaN	NaN	13379	79	NaN	NaN	12406	NaN	NaN	966	87.75	1104	4	BA (12.8-14.8)	MV1007-DO3-2-4	Chen et al. (2020)		NaN	Galápagos	1	1	1
0.459	-90.712	627	16285	150	NaN	NaN	14650	86	NaN	NaN	13502	NaN	NaN	1141	137.75	1104	4	HS1 (15-17.5)	MV1007-DO3-4-20	Chen et al. (2020)		NaN	Galápagos	1	1	1
0.459	-90.712	627	13654	200	NaN	NaN	12943	78	NaN	NaN	11821	NaN	NaN	1134	206.25	1104	4	BA (12.8-14.8)	MV1007-DO3-4-27	Chen et al. (2020)		NaN	Galápagos	1	1	1
0.459	-90.712	627	11231	63	NaN	NaN	10740	69	NaN	NaN	9811.2	NaN	NaN	916	118.75	1104	4		MV1007-DO3-4-37	Chen et al. (2020)		NaN	Galápagos	1	1	1
0.459	-90.712	627	17259	127	NaN	NaN	15507	91	NaN	NaN	14150	NaN	NaN	1320	150.25	1104	4	HS1 (15-17.5)	MV1007-DO3-4-42	Chen et al. (2020)		NaN	Galápagos	1	1	1
0.459	-90.712	627	15086	118	NaN	NaN	13852	80	NaN	NaN	12647	NaN	NaN	1196	125.75	1104	4	HS1 (15-17.5)	MV1007-DO3-4-51	Chen et al. (2020)		NaN	Galápagos	1	1	1
0.459	-90.712	627	16593	91	NaN	NaN	15082	89	NaN	NaN	13720	NaN	NaN	1362	111	1104	4	HS1 (15-17.5)	MV1007-DO3-4-52	Chen et al. (2020)		NaN	Galápagos	1	1	1
0.459	-90.712	627	13604	74	NaN	NaN	12788	76	NaN	NaN	11792	NaN	NaN	1019	110.25	1104	4	BA (12.8-14.8)	MV1007-DO3-4-53	Chen et al. (2020)		NaN	Galápagos	1	1	1
0.459	-90.712	627	13873	74	NaN	NaN	13079	77	NaN	NaN	12045	NaN	NaN	1062	104	1104	4	BA (12.8-14.8)	MV1007-DO3-4-55	Chen et al. (2020)		NaN	Galápagos	1	1	1
0.459	-90.712	627	16153	129	NaN	NaN	14559	85	NaN	NaN	13406	NaN	NaN	1146	126.25	1104	4	HS1 (15-17.5)	MV1007-DO3-4-59	Chen et al. (2020)		NaN	Galápagos	1	1	1
0.459	-90.712	627	14467	114	NaN	NaN	13400	79	NaN	NaN	12409	NaN	NaN	986	91	1104	4	BA (12.8-14.8)	MV1007-DO3-4-60	Chen et al. (2020)		NaN	Galápagos	1	1	1
0.459	-90.712	627	12178	70	NaN	NaN	11275	71	NaN	NaN	10376	NaN	NaN	903	75.75	1104	4	YD (11.8-12.7)	MV1007-DO3-5-16	Chen et al. (2020)		NaN	Galápagos	1	1	1
0.459	-90.712	627	16710	111	NaN	NaN	15158	90	NaN	NaN	13795	NaN	NaN	1370	112.25	1104	4	HS1 (15-17.5)	MV1007-DO3-5-37	Chen et al. (2020)		NaN	Galápagos	1	1	1
0.459	-90.712	627	145	17	NaN	NaN	975	50	NaN	NaN	156	NaN	NaN	820	63.75	1104	4	HOL (<6)	MV1007-DO9-19	Chen et al. (2020)		NaN	Galápagos	1	1	1
0.787	-91.304	589	11843	68	NaN	NaN	10920	69	NaN	NaN	10206	NaN	NaN	735	86.5	1104	4	YD (11.8-12.7)	MV1007-DO9-2	Chen et al. (2020)		NaN	Galápagos	1	1	1
-0.371	-90.815	421	2942	55	NaN	NaN	3673	53	NaN	NaN	2827	NaN	NaN	835	70	927	4	HOL (<6)	NA064-117-01-C-2B	Chen et al. (2020)		NaN	Galápagos	1	1	1
-0.371	-90.815	419	2517	21	NaN	NaN	3343	53	NaN	NaN	2488	NaN	NaN	859	56.25	927	4	HOL (<6)	NA064-118-1-C-2A	Chen et al. (2020)		NaN	Galápagos	1	1	1
-0.371	-90.815	419	3101	41	NaN	NaN	3787	53	NaN	NaN	2934	NaN	NaN	844	59.75	927	4	HOL (<6)	NA064-118-1-C-2B	Chen et al. (2020)		NaN	Galápagos	1	1	1
-1.33333	-11.9	600	3445	37	3770	30	4860	25	1090	39	3207	563	30	1629	52.5	836	2	HOL (<6)	RC24-08	Cleroux et al. (2011)	Low sed rate <2cm/kyr *, Not benthics - could just be mixed layer vs mixed layer	0.580552		0	0	0
-1.33333	-11.9	600	10287	63	9655	50	9605	30	-50	58	9182.4	472.6	50	428	85.25	836	2	EHOL (7-11)	RC24-08	Cleroux et al. (2011)	Not benthics - could just be mixed layer vs mixed layer	2.52746		0	0	0
-1.33333	-11.9	600	12780	32	11535	35	11975	35	440	49	10912	623	35	1080	76.5	836	2	BA (12.8-14.8)	RC24-08	Cleroux et al. (2011)	Not benthics - could just be mixed layer vs mixed layer	2.9734		0	0	0
-1.33333	-11.9	600	13600	60	12325	50	12780	40	455	64	11772	553	50	1010	80	836	2	BA (12.8-14.8)	RC24-08	Cleroux et al. (2011)	Not benthics - could just be mixed layer vs mixed layer	3.52941		0	0	0
-1.33333	-11.9	600	15402	68	13550	50	13695	45	145	67	12903	647	50	796	69.75	836	2	HS1 (15-17.5)	RC24-08	Cleroux et al. (2011)	Not benthics - could just be mixed layer vs mixed layer	3.63589		0	0	0
-1.33333	-11.9	600	15717	67	13790	50	14150	50	360	71	13110	680	50	1039	81.5	836	2	HS1 (15-17.5)	RC24-08	Cleroux et al. (2011)	Not benthics - could just be mixed layer vs mixed layer	3.81752		0	0	0
-1.33333	-11.9	600	16563	96	14440	70	14640	70	200	99	13696	744	70	940	99	836	2	HS1 (15-17.5)	RC24-08	Cleroux et al. (2011)	Not benthics - could just be mixed layer vs mixed layer	4.10554		0	0	0
-1.33333	-11.9	600	19008	116	16570	100	16790	60	220	117	15766	804	100	1027	140.5	836	2	LGM (19-21.8)	RC24-08	Cleroux et al. (2011)	Not benthics - could just be mixed layer vs mixed layer	4.31397	600m is the living depth of G. crassaformis (a deep-living PF). DeltaR is the average of the two values discussed in the paper	0	0	0
48.608	150.428	1980	4682	52	5190	35	6840	50	1650	61	4132	1058	35	2689	56.5	2087	3	HOL (<6)	Nesmeyanov25-1 GGC15	Cook and Keigwin (2015)		6.19393		1	1	1
48.608	150.428	1980	10718	86	10450	50	11350	70	900	86	9484.4	965.6	50	1865	102.5	2087	3	EHOL (7-11)	Nesmeyanov25-1 GGC15	Cook and Keigwin (2015)		6.71767		1	1	1
48.608	150.428	1980	16339	89	14750	70	15850	90	1100	114	13553	1197	70	2300	115	2087	3	HS1 (15-17.5)	Nesmeyanov25-1 GGC15	Cook and Keigwin (2015)		8.01763	Delta-R is the average of the two values discussed in Cood and Keigwin (2015)	1	1	1
48.752	150.431	1700	11049	77	10650	50	11600	55	950	74	9543	1107	50	2000	80.5	2087	3	EHOL (7-11)	Nesmeyanov25-1 GGC18	Cook and Keigwin (2015)		12.9423		1	1	1
48.752	150.431	1700	14035	98	13150	65	14100	50	950	82	12096	1054	65	1984	107.75	2087	3	BA (12.8-14.8)	Nesmeyanov25-1 GGC18	Cook and Keigwin (2015)		11.8988	Delta-R is the average of the two values discussed in Cood and Keigwin (2015)	1	1	1
48.874	150.432	1510	11205	47	10800	45	11750	60	950	75	9775	1025	45	1981	103	2030	3		Nesmeyanov25-1 GGC20	Cook and Keigwin (2015)		12.7622		1	1	1
48.874	150.432	1510	14453	117	13400	50	14450	85	1050	99	12404	996	50	2041	97	2030	3	BA (12.8-14.8)	Nesmeyanov25-1 GGC20	Cook and Keigwin (2015)		12.385	Delta-R is the average of the two values discussed in Cood and Keigwin (2015)	1	1	1
49.601	150.18	995	10859	95	10530	60	11650	85	1120	104	9569.8	960.2	60	2075	99.5	1771	3	EHOL (7-11)	Nesmeyanov25-1 GGC27	Cook and Keigwin (2015)		3.82171		1	1	1
49.601	150.18	995	13541	65	12760	55	13900	90	1140	105	11737	1023	55	2200	123	1771	3	BA (12.8-14.8)	Nesmeyanov25-1 GGC27	Cook and Keigwin (2015)		3.47094	Delta-R is the average of the two values discussed in Cood and Keigwin (2015)	1	1	1
51.05	168.097	3700	13589	60	12800	50	13850	110	1050	121	11729	1071	50	2096	131.5	2035	3	BA (12.8-14.8)	RNDB GGC15	Cook and Keigwin (2015)		2.13408		1	1	1
51.112	167.895	2804	14110	120	13200	75	14900	55	1700	93	12240	960	75	2678	120.75	2069	3	BA (12.8-14.8)	RNDB GGC5	Cook and Keigwin (2015)		2.19702		1	1	1
51.112	167.895	2804	21979	132	19450	120	21900	160	2450	200	18012	1438	120	3871	200.25	2069	3		RNDB GGC5	Cook and Keigwin (2015)		3.41235	Delta-R is the average of the two values discussed in Cood and Keigwin (2015)	1	1	1
51.073	168.975	3225	13935	72	13080	60	14400	85	1320	104	12028	1052	60	2360	103	2058	3	BA (12.8-14.8)	RNDB PC11	Cook and Keigwin (2015)		5.13097		1	1	1
51.073	168.975	3225	14019	102	13140	70	14200	80	1060	106	12063	1077	70	2096	127.5	2058	3	BA (12.8-14.8)	RNDB PC11	Cook and Keigwin (2015)		5.38555		1	1	1
51.073	168.975	3225	16602	114	14950	85	16650	110	1700	139	13727	1223	85	2925	133.25	2058	3	HS1 (15-17.5)	RNDB PC11	Cook and Keigwin (2015)		6.50524		1	1	1
49.725	168.312	2329	13958	90	13100	70	14800	65	1700	96	12003	1097	70	2748	107.25	2033	3	BA (12.8-14.8)	RNDB PC13	Cook and Keigwin (2015)		3.79711		1	1	1
49.725	168.312	2329	14918	142	13660	90	16000	85	2340	124	12518	1142	90	3467	132	2033	3		RNDB PC13	Cook and Keigwin (2015)		4.0555		1	1	1
49.725	168.312	2329	17793	79	15900	60	17350	90	1450	108	14509	1391	60	2827	116.25	2033	3		RNDB PC13	Cook and Keigwin (2015)		4.43995		1	1	1
49.725	168.312	2329	19555	140	17500	110	20100	160	2600	194	16222	1278	110	3878	209.75	2033	3	LGM (19-21.8)	RNDB PC13	Cook and Keigwin (2015)		5.11378	Delta-R is the average of the two values discussed in Cood and Keigwin (2015)	1	1	1
53.707	165.013	3960	13661.5	41	12860	35	13750	80	890	87	11835	1025	35	1927	88.5	2087	3	BA (12.8-14.8)	VINO19-4 GGC17	Cook and Keigwin (2015)		6.58786	Delta-R is the average of the two values discussed in Cood and Keigwin (2015)	1	1	1
50.42	167.732	3300	13691	138	12880	115	13260	110	380	159	11836	1044	115	1421	174	2024	3	BA (12.8-14.8)	VINO19-4 GGC37	Cook and Keigwin (2015)		4.01724		1	1	1
50.42	167.732	3300	13722	118	12910	95	13280	115	370	149	11801	1109	95	1414	162.25	2024	3	BA (12.8-14.8)	VINO19-4 GGC37	Cook and Keigwin (2015)		3.57091	Delta-R is the average of the two values discussed in Cood and Keigwin (2015)	1	1	1
-6.1	147.6	150	12449	32	NaN	NaN	11300	110	NaN	NaN	10379	NaN	NaN	899	123.75	577	4	YD (11.8-12.7)	papua	Cutler et al., 2004		NaN	R-age by Radcal, R-age corr. Used in Intcal: 480	1	1	1
-6.1	147.6	150	12542	65	NaN	NaN	11410	63	NaN	NaN	10505	NaN	NaN	905	92	577	4	YD (11.8-12.7)	papua	Cutler et al., 2004		NaN	R-age by Radcal, R-age corr. Used in Intcal: 480	1	1	1
-6.1	147.6	150	12938	63	NaN	NaN	11805	80	NaN	NaN	11046	NaN	NaN	780	91.5	577	4	BA (12.8-14.8)	papua	Cutler et al., 2004		NaN	R-age by Radcal, R-age corr. Used in Intcal: 480	1	1	1
-6.1	147.6	150	14611	26	NaN	NaN	13270	120	NaN	NaN	12470	NaN	NaN	800	120.75	577	4	BA (12.8-14.8)	papua	Cutler et al., 2004		NaN	R-age by Radcal, R-age corr. Used in Intcal: 480	1	1	1
-6.1	147.6	150	36790	91	NaN	NaN	33580	320	NaN	NaN	32445	NaN	NaN	1120	338.75	577	4		papua	Cutler et al., 2004		NaN	R-age by Radcal, R-age corr. Used in Intcal: 480	1	1	1
-15.6	167	150	11045	16	NaN	NaN	10810	40	NaN	NaN	9547	NaN	NaN	1250	48.25	571	4		tasmaloum	Cutler et al., 2004		NaN	R-age by Radcal, R-age corr. Used in Intcal: 480	1	1	1
-15.6	167	150	11449	19	NaN	NaN	10990	40	NaN	NaN	10012	NaN	NaN	970	45.75	571	4		tasmaloum	Cutler et al., 2004		NaN	R-age by Radcal, R-age corr. Used in Intcal: 480	1	1	1
-15.6	167	150	12151	27	NaN	NaN	11250	35	NaN	NaN	10360	NaN	NaN	887	40.5	571	4	YD (11.8-12.7)	tasmaloum	Cutler et al., 2004		NaN	R-age by Radcal, R-age corr. Used in Intcal: 480	1	1	1
-15.6	167	150	12157	40	NaN	NaN	11276	90	NaN	NaN	10354	NaN	NaN	908	91.75	571	4	YD (11.8-12.7)	tasmaloum	Cutler et al., 2004		NaN	R-age by Radcal, R-age corr. Used in Intcal: 480	1	1	1
-15.6	167	150	12247	22	NaN	NaN	11460	48	NaN	NaN	10361	NaN	NaN	1074	53	571	4	YD (11.8-12.7)	tasmaloum	Cutler et al., 2004		NaN	R-age by Radcal, R-age corr. Used in Intcal: 480	1	1	1
-15.6	167	150	12640	10	NaN	NaN	11630	40	NaN	NaN	10596	NaN	NaN	1035	44	571	4	YD (11.8-12.7)	tasmaloum	Cutler et al., 2004		NaN	R-age by Radcal, R-age corr. Used in Intcal: 480	1	1	1
-15.6	167	150	12740	24	NaN	NaN	11746	100	NaN	NaN	10783	NaN	NaN	960	127.5	571	4		tasmaloum	Cutler et al., 2004		NaN	R-age by Radcal, R-age corr. Used in Intcal: 480	1	1	1
-15.6	167	150	12886	32	NaN	NaN	12140	60	NaN	NaN	10975	NaN	NaN	1150	69	571	4	BA (12.8-14.8)	tasmaloum	Cutler et al., 2004		NaN	R-age by Radcal, R-age corr. Used in Intcal: 480	1	1	1
-15.6	167	150	13287	83	NaN	NaN	12486	70	NaN	NaN	11372	NaN	NaN	1072	115.5	571	4	BA (12.8-14.8)	tasmaloum	Cutler et al., 2004		NaN	R-age by Radcal, R-age corr. Used in Intcal: 480	1	1	1
-15.6	167	150	13959	21	NaN	NaN	13033	80	NaN	NaN	12002	NaN	NaN	1018	85.75	571	4	BA (12.8-14.8)	tasmaloum	Cutler et al., 2004		NaN	R-age by Radcal, R-age corr. Used in Intcal: 480	1	1	1
-15.6	167	150	14042	27	NaN	NaN	13396	90	NaN	NaN	12112	NaN	NaN	1280	107	571	4	BA (12.8-14.8)	tasmaloum	Cutler et al., 2004		NaN	R-age by Radcal, R-age corr. Used in Intcal: 480	1	1	1
-15.6	167	150	14057	17	NaN	NaN	13250	35	NaN	NaN	12145	NaN	NaN	1103	56	571	4	BA (12.8-14.8)	tasmaloum	Cutler et al., 2004		NaN	R-age by Radcal, R-age corr. Used in Intcal: 480	1	1	1
-15.6	167	150	14059	29	NaN	NaN	13406	64	NaN	NaN	12150	NaN	NaN	1255	87.75	571	4	BA (12.8-14.8)	tasmaloum	Cutler et al., 2004		NaN	R-age by Radcal, R-age corr. Used in Intcal: 480	1	1	1
-15.6	167	150	14221	20	NaN	NaN	13256	70	NaN	NaN	12312	NaN	NaN	944	72.25	571	4	BA (12.8-14.8)	tasmaloum	Cutler et al., 2004		NaN	R-age by Radcal, R-age corr. Used in Intcal: 480	1	1	1
-15.6	167	150	14259	34	NaN	NaN	13500	55	NaN	NaN	12325	NaN	NaN	1174	65	571	4	BA (12.8-14.8)	tasmaloum	Cutler et al., 2004		NaN	R-age by Radcal, R-age corr. Used in Intcal: 480	1	1	1
-15.6	167	150	14358	33	NaN	NaN	13224	105	NaN	NaN	12396	NaN	NaN	836	108	571	4	BA (12.8-14.8)	tasmaloum	Cutler et al., 2004		NaN	R-age by Radcal, R-age corr. Used in Intcal: 480	1	1	1
-15.6	167	150	14565	22	NaN	NaN	13410	40	NaN	NaN	12452	NaN	NaN	958	49.5	571	4	BA (12.8-14.8)	tasmaloum	Cutler et al., 2004		NaN	R-age by Radcal, R-age corr. Used in Intcal: 480	1	1	1
-15.6	167	150	14866	51	NaN	NaN	13661	95	NaN	NaN	12498	NaN	NaN	1173	108.25	571	4		tasmaloum	Cutler et al., 2004		NaN	R-age by Radcal, R-age corr. Used in Intcal: 480	1	1	1
-15.6	167	150	14870	21	NaN	NaN	13390	45	NaN	NaN	12500	NaN	NaN	892	55	571	4		tasmaloum	Cutler et al., 2004		NaN	R-age by Radcal, R-age corr. Used in Intcal: 480	1	1	1
-15.6	167	150	15278	28	NaN	NaN	14040	45	NaN	NaN	12812	NaN	NaN	1227	66	571	4	HS1 (15-17.5)	tasmaloum	Cutler et al., 2004		NaN	R-age by Radcal, R-age corr. Used in Intcal: 480	1	1	1
-15.6	167	150	19623	34	NaN	NaN	18146	90	NaN	NaN	16349	NaN	NaN	1806	109.5	571	4	LGM (19-21.8)	tasmaloum	Cutler et al., 2004		NaN	R-age by Radcal, R-age corr. Used in Intcal: 480	1	1	1
-15.6	167	150	20385	27	NaN	NaN	18260	80	NaN	NaN	16843	NaN	NaN	1415	90	571	4	LGM (19-21.8)	tasmaloum	Cutler et al., 2004		NaN	R-age by Radcal, R-age corr. Used in Intcal: 480	1	1	1
-15.6	167	150	20559	38	NaN	NaN	18916	160	NaN	NaN	17064	NaN	NaN	1857	168.5	571	4	LGM (19-21.8)	tasmaloum	Cutler et al., 2004		NaN	R-age by Radcal, R-age corr. Used in Intcal: 480	1	1	1
-15.6	167	150	21568	29	NaN	NaN	19476	150	NaN	NaN	17806	NaN	NaN	1669	153.5	571	4	LGM (19-21.8)	tasmaloum	Cutler et al., 2004		NaN	R-age by Radcal, R-age corr. Used in Intcal: 480	1	1	1
-15.6	167	150	6150	14	NaN	NaN	6132	50	NaN	NaN	5303	NaN	NaN	816	56.5	571	4		urlepa	Cutler et al., 2004		NaN	R-age by Radcal, R-age corr. used in Intcal: 350	1	1	1
-15.6	167	150	6675	20	NaN	NaN	6767	65	NaN	NaN	5883	NaN	NaN	898	72.5	571	4		urlepa	Cutler et al., 2004		NaN	R-age by Radcal, R-age corr. Used in Intcal: 350	1	1	1
-15.6	167	150	6833	18	NaN	NaN	6762	48	NaN	NaN	5988.2	NaN	NaN	763	51.5	571	4		urlepa	Cutler et al., 2004		NaN	R-age by Radcal, R-age corr. Used in Intcal: 350	1	1	1
-15.6	167	150	8719	17	NaN	NaN	8647	55	NaN	NaN	7923.2	NaN	NaN	720	58.25	571	4	EHOL (7-11)	urlepa	Cutler et al., 2004		NaN	R-age by Radcal, R-age corr. Used in Intcal: 350	1	1	1
-15.6	167	150	9680	11	NaN	NaN	9272	65	NaN	NaN	8714	NaN	NaN	551	69.5	571	4	EHOL (7-11)	urlepa	Cutler et al., 2004		NaN	R-age by Radcal, R-age corr. Used in Intcal: 350	1	1	1
-15.6	167	150	9873	17	NaN	NaN	9553	80	NaN	NaN	8782.6	NaN	NaN	755	82.75	571	4	EHOL (7-11)	urlepa	Cutler et al., 2004		NaN	R-age by Radcal, R-age corr. Used in Intcal: 350	1	1	1
-15.6	167	150	10296	22	NaN	NaN	9893	68	NaN	NaN	9195.8	NaN	NaN	701	72.25	571	4	EHOL (7-11)	urlepa	Cutler et al., 2004		NaN	R-age by Radcal, R-age corr. Used in Intcal: 350	1	1	1
-15.6	167	150	10457	21	NaN	NaN	9917	50	NaN	NaN	9268.4	NaN	NaN	659	57.25	571	4	EHOL (7-11)	urlepa	Cutler et al., 2004		NaN	R-age by Radcal, R-age corr. Used in Intcal: 350	1	1	1
-15.6	167	150	11208	24	NaN	NaN	10317	65	NaN	NaN	9781.6	NaN	NaN	543	84.5	571	4		urlepa	Cutler et al., 2004		NaN	R-age by Radcal, R-age corr. Used in Intcal: 350	1	1	1
-15.6	167	150	11221	26	NaN	NaN	10482	50	NaN	NaN	9799.8	NaN	NaN	680	77.25	571	4		urlepa	Cutler et al., 2004		NaN	R-age by Radcal, R-age corr. Used in Intcal: 350	1	1	1
-15.6	167	150	11288	19	NaN	NaN	10477	70	NaN	NaN	9935	NaN	NaN	549	74.25	571	4		urlepa	Cutler et al., 2004		NaN	R-age by Radcal, R-age corr. Used in Intcal: 350	1	1	1
-15.6	167	150	11387	25	NaN	NaN	10527	60	NaN	NaN	9949	NaN	NaN	539	70.5	571	4		urlepa	Cutler et al., 2004		NaN	R-age by Radcal, R-age corr. Used in Intcal: 350	1	1	1
-15.6	167	150	11632	54	NaN	NaN	10732	80	NaN	NaN	10064	NaN	NaN	674	85.75	571	4		urlepa	Cutler et al., 2004		NaN	R-age by Radcal, R-age corr. Used in Intcal: 350	1	1	1
-15.6	167	150	11698	22	NaN	NaN	10842	45	NaN	NaN	10083	NaN	NaN	762	51.75	571	4		urlepa	Cutler et al., 2004		NaN	R-age by Radcal, R-age corr. Used in Intcal: 350	1	1	1
-15.6	167	150	12610	25	NaN	NaN	11556	16	NaN	NaN	10530	NaN	NaN	1020	46.75	571	4	YD (11.8-12.7)	urlepa	Cutler et al., 2004		NaN	R-age by Radcal, R-age corr. Used in Intcal: 350	1	1	1
-15.6	167	150	12630	34	NaN	NaN	11727	120	NaN	NaN	10606	NaN	NaN	1158	128.5	571	4	YD (11.8-12.7)	urlepa	Cutler et al., 2004		NaN	R-age by Radcal, R-age corr. Used in Intcal: 350	1	1	1
-15.6	167	150	15945	35	NaN	NaN	14082	85	NaN	NaN	13265	NaN	NaN	812	93.5	571	4	HS1 (15-17.5)	urlepa	Cutler et al., 2004		NaN	R-age by Radcal, R-age corr. Used in Intcal: 350	1	1	1
-15.6	167	150	21606	51	NaN	NaN	19122	150	NaN	NaN	17796	NaN	NaN	1320	153.75	571	4	LGM (19-21.8)	urlepa	Cutler et al., 2004		NaN	R-age by Radcal, R-age corr. Used in Intcal: 350	1	1	1
-15.6	167	150	22127	49	NaN	NaN	19552	150	NaN	NaN	18177	NaN	NaN	1377	159.75	571	4		urlepa	Cutler et al., 2004		NaN	R-age by Radcal, R-age corr. Used in Intcal: 350	1	1	1
-15.6	167	150	22260	57	NaN	NaN	19532	120	NaN	NaN	18291	NaN	NaN	1235	139	571	4		urlepa	Cutler et al., 2004		NaN	R-age by Radcal, R-age corr. Used in Intcal: 350	1	1	1
-15.6	167	150	22690	70	NaN	NaN	20352	140	NaN	NaN	18784	NaN	NaN	1572	148.25	571	4		urlepa	Cutler et al., 2004		NaN	R-age by Radcal, R-age corr. Used in Intcal: 350	1	1	1
-15.6	167	150	22709	38	NaN	NaN	20292	200	NaN	NaN	18786	NaN	NaN	1505	202.25	571	4		urlepa	Cutler et al., 2004		NaN	R-age by Radcal, R-age corr. Used in Intcal: 350	1	1	1
-45.15	146.28	150	8800	200	8486	45	NaN	NaN	NaN	NaN	7985	501	45	532	156	600	8	EHOL (7-11)	MD97-2106	Dai et al. (2020)		7.72727		1	1	1
-45.15	146.28	150	14980.6	200	13009	60	NaN	NaN	NaN	NaN	12576	433	60	431	147.75	600	8		MD97-2106	Dai et al. (2020)		9.21189		1	1	1
-45.15	146.28	150	18358.6	200	16079	70	NaN	NaN	NaN	NaN	15229	850	70	948	209	600	8		MD97-2106	Dai et al. (2020)		11.0575		1	1	1
-45.15	146.28	3310	8489	288	NaN	NaN	8935	20	NaN	NaN	7724.6	NaN	NaN	1211	227.5	1510	8	EHOL (7-11)	MD97-2106	Dai et al. (2020)		7.53917		1	1	1
-45.15	146.28	3310	10844	391	NaN	NaN	10815	25	NaN	NaN	9590.2	NaN	NaN	1254	242.75	1510	8	EHOL (7-11)	MD97-2106	Dai et al. (2020)		7.74622		1	1	1
-45.15	146.28	3310	11096	367	NaN	NaN	11210	30	NaN	NaN	9632.2	NaN	NaN	1557	239	1510	8	EHOL (7-11)	MD97-2106	Dai et al. (2020)		7.75054		1	1	1
-45.15	146.28	3310	11583	386	NaN	NaN	11620	30	NaN	NaN	10015	NaN	NaN	1566	165	1510	8	YD (11.8-12.7)	MD97-2106	Dai et al. (2020)		7.77001		1	1	1
-45.15	146.28	3310	11843	337	NaN	NaN	11935	30	NaN	NaN	10206	NaN	NaN	1745	171.5	1510	8	YD (11.8-12.7)	MD97-2106	Dai et al. (2020)		7.93718		1	1	1
-45.15	146.28	3310	11986	312	NaN	NaN	11837	41	NaN	NaN	10289	NaN	NaN	1549	152.75	1510	8	YD (11.8-12.7)	MD97-2106	Dai et al. (2020)		8.00934		1	1	1
-45.15	146.28	3310	12582	229	NaN	NaN	12700	39	NaN	NaN	10476	NaN	NaN	2156	121	1510	8		MD97-2106	Dai et al. (2020)		8.50421		1	1	1
-45.15	146.28	3310	12906	229	NaN	NaN	12650	45	NaN	NaN	11011	NaN	NaN	1644	271.75	1510	8		MD97-2106	Dai et al. (2020)		8.67813		1	1	1
-45.15	146.28	3310	13337	262	NaN	NaN	13015	30	NaN	NaN	11483	NaN	NaN	1532	245.5	1510	8	BA (12.8-14.8)	MD97-2106	Dai et al. (2020)		8.77259		1	1	1
-45.15	146.28	3310	13836	299	NaN	NaN	13215	45	NaN	NaN	12013	NaN	NaN	1228	255	1510	8	BA (12.8-14.8)	MD97-2106	Dai et al. (2020)		8.96213		1	1	1
-45.15	146.28	3310	14017	304	NaN	NaN	13149	43	NaN	NaN	12059	NaN	NaN	1039	220.75	1510	8	BA (12.8-14.8)	MD97-2106	Dai et al. (2020)		8.98908		1	1	1
-45.15	146.28	3310	14560	324	NaN	NaN	13686	42	NaN	NaN	12449	NaN	NaN	1263	152	1510	8	BA (12.8-14.8)	MD97-2106	Dai et al. (2020)		9.2033		1	1	1
-45.15	146.28	3310	15158	315	NaN	NaN	14450	60	NaN	NaN	12713	NaN	NaN	1731	206.25	1510	8	HS1 (15-17.5)	MD97-2106	Dai et al. (2020)		9.49993		1	1	1
-45.15	146.28	3310	16109	512	NaN	NaN	15410	90	NaN	NaN	13382	NaN	NaN	2011	363.25	1510	8	HS1 (15-17.5)	MD97-2106	Dai et al. (2020)		9.80818		1	1	1
-45.15	146.28	3310	16788	566	NaN	NaN	15309	50	NaN	NaN	13823	NaN	NaN	1470	387	1510	8	HS1 (15-17.5)	MD97-2106	Dai et al. (2020)		9.9178		1	1	1
-45.15	146.28	3310	17691	657	NaN	NaN	16690	70	NaN	NaN	14460	NaN	NaN	2179	503.25	1510	8	HS1 (15-17.5)	MD97-2106	Dai et al. (2020)		10.0051		1	1	1
-45.15	146.28	3310	17956	566	NaN	NaN	16660	45	NaN	NaN	14661	NaN	NaN	1988	395.75	1510	8	HS1 (15-17.5)	MD97-2106	Dai et al. (2020)		10.4143		1	1	1
-45.15	146.28	3310	18289	451	NaN	NaN	17670	70	NaN	NaN	15105	NaN	NaN	2600	404.5	1510	8		MD97-2106	Dai et al. (2020)		11.1542		1	1	1
-45.15	146.28	3310	18761	361	NaN	NaN	17375	50	NaN	NaN	15425	NaN	NaN	1917	298	1510	8	LGM (19-21.8)	MD97-2106	Dai et al. (2020)		11.0602		1	1	1
-45.15	146.28	3310	19740	438	NaN	NaN	17889	62	NaN	NaN	16350	NaN	NaN	1504	364	1510	8	LGM (19-21.8)	MD97-2106	Dai et al. (2020)		10.9929		1	1	1
-45.15	146.28	3310	21018	609	NaN	NaN	19420	50	NaN	NaN	17479	NaN	NaN	1934	457.5	1510	8	LGM (19-21.8)	MD97-2106	Dai et al. (2020)		10.6575		1	1	1
-45.15	146.28	3310	23335	915	NaN	NaN	22340	60	NaN	NaN	19408	NaN	NaN	2902	770.25	1510	8		MD97-2106	Dai et al. (2020)		10.0921		1	1	1
59.5553	-144.154	682	594	74	1650	90	2505	50	855	103	607	1043	90	1894	134.75	1470	3	HOL (<6)	EW0408-84TC	Davies-Walczak et al. (2014)		208.754		1	1	1
59.5553	-144.154	682	1254	76	2340	70	2890	20	550	73	1279	1061	70	1592	94	1470	3	HOL (<6)	EW0408-84TC	Davies-Walczak et al. (2014)		140.351		1	1	1
59.5553	-144.154	682	1702	83	2730	70	3440	60	710	92	1780	950	70	1637	95.5	1470	3	HOL (<6)	EW0408-84TC	Davies-Walczak et al. (2014)		130.435		1	1	1
59.5553	-144.154	682	2699.5	78	3560	60	4160	20	600	63	2494.5	1065.5	60	1644	55.25	1470	3	HOL (<6)	EW0408-84TC	Davies-Walczak et al. (2014)		94.0915		1	1	1
59.5553	-144.154	682	3233	87	4000	80	4810	60	810	100	3042	958	80	1775	89.5	1470	3	HOL (<6)	EW0408-84TC	Davies-Walczak et al. (2014)		94.0303		1	1	1
59.5553	-144.154	682	3651	80	4330	60	5015	45	685	75	3438	892	60	1604	76.75	1470	3	HOL (<6)	EW0408-84TC	Davies-Walczak et al. (2014)		97.5075		1	1	1
59.5553	-144.154	682	4499	121	4990	90	5840	25	850	93	3994	996	90	1804	88	1470	3	HOL (<6)	EW0408-84TC	Davies-Walczak et al. (2014)		89.7977		1	1	1
59.5553	-144.154	682	5162	89	5500	70	6345	30	845	76	4513.2	986.8	70	1852	59.25	1470	3	HOL (<6)	EW0408-84TC	Davies-Walczak et al. (2014)		87.9504		1	1	1
59.5553	-144.154	682	6170	40	6410	25	7190	25	780	35	5302	1108	25	1850	52.75	1470	3		EW0408-84TC	Davies-Walczak et al. (2014)		81.6856		1	1	1
59.5553	-144.154	682	7773	34	7980	25	8855	35	875	43	6938.4	1041.6	25	1904	48.5	1470	3	EHOL (7-11)	EW0408-84TC	Davies-Walczak et al. (2014)		71.401		1	1	1
59.5553	-144.154	682	8428.5	84	8610	80	9265	30	655	85	7684.7	925.3	80	1599	104.75	1470	3	EHOL (7-11)	EW0408-84TC	Davies-Walczak et al. (2014)		71.7803		1	1	1
59.5553	-144.154	682	8986	144	9020	120	9800	30	780	124	8001.6	1018.4	120	1760	100.25	1470	3	EHOL (7-11)	EW0408-84TC	Davies-Walczak et al. (2014)		72.8912		1	1	1
59.5553	-144.154	682	9736	94	9660	70	10355	45	695	83	8771.2	888.8	70	1591	73.75	1470	3	EHOL (7-11)	EW0408-84TC	Davies-Walczak et al. (2014)		72.4117		1	1	1
59.5553	-144.154	682	10151.5	35	9930	30	10650	25	720	39	8913.6	1016.4	30	1730	57.75	1470	3	EHOL (7-11)	EW0408-84TC	Davies-Walczak et al. (2014)		71.418		1	1	1
59.5553	-144.154	682	10546	35	10260	25	10915	25	655	35	9314	946	25	1582	54	1470	3	EHOL (7-11)	EW0408-84TC	Davies-Walczak et al. (2014)		70.1688		1	1	1
59.5553	-144.154	682	10819	84	10410	100	11000	130	590	164	9593.2	816.8	100	1438	140.5	1470	3	EHOL (7-11)	EW0408-84TC	Davies-Walczak et al. (2014)		69.6922		1	1	1
59.5553	-144.154	682	11084	40	10600	35	11195	30	595	46	9625.4	974.6	35	1579	54.5	1470	3		EW0408-84TC	Davies-Walczak et al. (2014)		68.4771		1	1	1
59.5553	-144.154	682	11350	48	10855	30	11620	30	765	42	9975	880	30	1655	53.25	1470	3		EW0408-84TC	Davies-Walczak et al. (2014)		67.8414		1	1	1
59.5553	-144.154	682	11708	40	11065	25	12315	35	1250	43	10091	974	25	2225	48.25	1470	3		EW0408-84TC	Davies-Walczak et al. (2014)		66.6211		1	1	1
59.5553	-144.154	682	11992	44	11250	25	12670	35	1420	43	10291	959	25	2372	51	1470	3	YD (11.8-12.7)	EW0408-84TC	Davies-Walczak et al. (2014)		65.8773		1	1	1
59.5553	-144.154	682	12436	51	11520	25	12520	30	1000	39	10372	1148	25	2131	69.5	1470	3	YD (11.8-12.7)	EW0408-84TC	Davies-Walczak et al. (2014)		63.8871		1	1	1
59.5553	-144.154	682	13526	43	12705	25	13365	35	660	43	11740	965	25	1676	74.25	1470	3	BA (12.8-14.8)	EW0408-84TC	Davies-Walczak et al. (2014)		59.1084		1	1	1
59.5553	-144.154	682	13722	55	12810	60	13430	45	620	75	11801	1009	60	1586	79.5	1470	3	BA (12.8-14.8)	EW0408-84TC	Davies-Walczak et al. (2014)		58.592		1	1	1
59.5553	-144.154	682	14019.5	35	13080	30	13695	30	615	42	12064	1016	30	1622	71	1470	3	BA (12.8-14.8)	EW0408-84TC	Davies-Walczak et al. (2014)		57.7767		1	1	1
59.5553	-144.154	682	14191	58	13170	60	13830	35	660	69	12296	874	60	1539	58	1470	3	BA (12.8-14.8)	EW0408-84TC	Davies-Walczak et al. (2014)		57.7831		1	1	1
59.5553	-144.154	682	14393	70	13310	80	13945	45	635	92	12396	914	80	1551	59	1470	3	BA (12.8-14.8)	EW0408-84TC	Davies-Walczak et al. (2014)		57.3195		1	1	1
59.5553	-144.154	682	14593	61	13430	45	13740	35	310	57	12464	966	45	1283	50	1470	3	BA (12.8-14.8)	EW0408-84TC	Davies-Walczak et al. (2014)		56.8766		1	1	1
59.5553	-144.154	682	14747	48	13420	30	13965	30	545	42	12368	1052	30	1557	62.25	1470	3	BA (12.8-14.8)	EW0408-84TC	Davies-Walczak et al. (2014)		56.5878		1	1	1
59.5553	-144.154	682	15219	49	13830	35	14425	30	595	46	12757	1073	35	1665	63.25	1470	3	HS1 (15-17.5)	EW0408-84TC	Davies-Walczak et al. (2014)		55.1942		1	1	1
59.5553	-144.154	682	15901	44	14345	30	14880	35	535	46	13243	1102	30	1635	56.75	1470	3	HS1 (15-17.5)	EW0408-84TC	Davies-Walczak et al. (2014)		53.7073		1	1	1
59.5553	-144.154	682	16276	41	14645	35	15205	45	560	57	13495	1150	35	1707	65	1470	3	HS1 (15-17.5)	EW0408-84TC	Davies-Walczak et al. (2014)		53.8216		1	1	1
59.5553	-144.154	682	16486.5	49	14870	50	15440	60	570	78	13644	1226	50	1792	75.5	1470	3	HS1 (15-17.5)	EW0408-84TC	Davies-Walczak et al. (2014)		54.8327		1	1	1
59.5553	-144.154	682	16586	44	14890	60	15590	90	700	108	13715	1175	60	1874	101.75	1470	3	HS1 (15-17.5)	EW0408-84TC	Davies-Walczak et al. (2014)		60.533		1	1	1
59.5553	-144.154	682	16672	42	15040	80	15640	60	600	100	13775	1265	80	1866	74.25	1470	3	HS1 (15-17.5)	EW0408-84TC	Davies-Walczak et al. (2014)		63.2198		1	1	1
59.5553	-144.154	682	16747	43	14860	80	15680	160	820	179	13810	1050	80	1870	161.75	1470	3	HS1 (15-17.5)	EW0408-84TC	Davies-Walczak et al. (2014)		65.8625		1	1	1
59.5553	-144.154	682	16843	37	15080	40	16110	90	1030	98	13842	1238	40	2266	95.5	1470	3	HS1 (15-17.5)	EW0408-84TC	Davies-Walczak et al. (2014)		68.4557		1	1	1
59.5553	-144.154	682	16916	36	15110	60	15830	60	720	85	13877	1233	60	1950	72	1470	3	HS1 (15-17.5)	EW0408-84TC	Davies-Walczak et al. (2014)		71.1161		1	1	1
59.5553	-144.154	682	16999	48	15160	35	15720	90	560	97	13946	1214	35	1764	112.25	1470	3	HS1 (15-17.5)	EW0408-84TC	Davies-Walczak et al. (2014)		73.7102		1	1	1
0.0218333	-86.4627	150	11760	200	10364	150	NaN	NaN	NaN	NaN	10140	224	150	223	108	712	4	YD (11.8-12.7)	ODP1240	de la Fuente et al. (2015) - LCS updated dataset		10.9694	PF 14C is interpolated	1	1	1
0.0218333	-86.4627	150	15000	200	12701	150	NaN	NaN	NaN	NaN	12595	106	150	103	46.5	712	4		ODP1240	de la Fuente et al. (2015) - LCS updated dataset		12.0667	PF 14C is interpolated, assigned to BA based on stratigraphic tie	1	1	1
0.0218333	-86.4627	150	17600	200	15676	150	NaN	NaN	NaN	NaN	14465	1211	150	1229	199.25	712	4	HS1 (15-17.5)	ODP1240	de la Fuente et al. (2015) - LCS updated dataset		14.1477	PF 14C is interpolated	1	1	1
0.0218333	-86.4627	150	23500	200	20705	150	NaN	NaN	NaN	NaN	19564	1141	150	1215	223.75	712	4		ODP1240	de la Fuente et al. (2015) - LCS updated dataset		14.8085	PF 14C is interpolated	1	1	1
0.0218333	-86.4627	2921	2730	200	3243	27	4242	38	999	47	2573	670	27	1656	158.5	2030	4	HOL (<6)	ODP1240	de la Fuente et al. (2015) - LCS updated dataset		2.1978		1	1	1
0.0218333	-86.4627	2921	3756.5	200	4136	27	5130	48	994	55	3485.5	650.5	27	1641	166	2030	4	HOL (<6)	ODP1240	de la Fuente et al. (2015) - LCS updated dataset		3.72687		1	1	1
0.0218333	-86.4627	2921	8261.5	200	8046	37	8885	47	839	60	7436.4	609.6	37	1439	221.25	2030	4	EHOL (7-11)	ODP1240	de la Fuente et al. (2015) - LCS updated dataset		4.59965		1	1	1
0.0218333	-86.4627	2921	9567	200	8937.5	62.2415	9677	57	739.5	84	8699.6	237.9	62.2415	1033	180	2030	4	EHOL (7-11)	ODP1240	de la Fuente et al. (2015) - LCS updated dataset		8.10076		1	1	1
0.0218333	-86.4627	2921	10445.4	200	9388	63.6553	10095	62	707	89	9283	105	63.6553	830	187.75	2030	4	EHOL (7-11)	ODP1240	de la Fuente et al. (2015) - LCS updated dataset		11.249		1	1	1
0.0218333	-86.4627	2921	12852	200	11215	55	12373	62	1158	83	10989	226	55	1413	247	2030	4		ODP1240	de la Fuente et al. (2015) - LCS updated dataset		10.7376		1	1	1
0.0218333	-86.4627	2921	13572	200	11964	55	12934	64	970	84	11670	294	55	1197	206	2030	4	BA (12.8-14.8)	ODP1240	de la Fuente et al. (2015) - LCS updated dataset		11.1995		1	1	1
0.0218333	-86.4627	2921	14494.2	200	12492	58	13801	67	1309	89	12419	73	58	1390	102.25	2030	4	BA (12.8-14.8)	ODP1240	de la Fuente et al. (2015) - LCS updated dataset		12.2117		1	1	1
0.0218333	-86.4627	2921	16451.5	200	14273	67	15260	70	987	97	13628	645	67	1631	149.25	2030	4	HS1 (15-17.5)	ODP1240	de la Fuente et al. (2015) - LCS updated dataset		12.4609		1	1	1
0.0218333	-86.4627	2921	16973.8	200	14794	77	15922	86	1128	115	13920	874	77	1973	173.25	2030	4	HS1 (15-17.5)	ODP1240	de la Fuente et al. (2015) - LCS updated dataset		13.0201		1	1	1
0.0218333	-86.4627	2921	18291	200	16713	91	18152	107	1439	140	15111	1602	91	3099	227	2030	4		ODP1240	de la Fuente et al. (2015) - LCS updated dataset		14.2693		1	1	1
0.0218333	-86.4627	2921	19704.5	200	17546	88	19668	99	2122	132	16370	1176	88	3316	193.5	2030	4	LGM (19-21.8)	ODP1240	de la Fuente et al. (2015) - LCS updated dataset		15.4279		1	1	1
0.0218333	-86.4627	2921	22245	200	19492	154	20946	178	1454	235	18276	1216	154	2644	285.25	2030	4		ODP1240	de la Fuente et al. (2015) - LCS updated dataset		14.2953		1	1	1
0.0218333	-86.4627	2921	24483	200	20705	116	22753	159	2048	197	20356	349	116	2366	213.75	2030	4		ODP1240	de la Fuente et al. (2015) - LCS updated dataset		14.2139		1	1	1
0.0218333	-86.4627	2921	26214	200	23310	170	24238	212	928	272	21965	1345	170	2230	320.25	2030	4	preLGM (25-30)	ODP1240	de la Fuente et al. (2015) - LCS updated dataset		13.8094		1	1	1
-36.22	-73.67	1000	10056.5	415	9160	380	9970	60	810	385	8910.5	249.5	380	1058	264.25	1045	4	EHOL (7-11)	SO161-SL22	De Pol-Holz et al. (2010)		25.1579		1	1	1
-36.22	-73.67	1000	11591	98	11050	55	11300	55	250	78	10010	1040	55	1251	69	1045	4		SO161-SL22	De Pol-Holz et al. (2010)		27.6939		1	1	1
-36.22	-73.67	1000	12492	128	11700	100	12300	80	600	128	10512	1188	100	1834	135	1045	4	YD (11.8-12.7)	SO161-SL22	De Pol-Holz et al. (2010)		27.6177		1	1	1
-36.22	-73.67	1000	13853	115	13050	100	13400	60	350	117	12017	1033	100	1403	119.25	1045	4	BA (12.8-14.8)	SO161-SL22	De Pol-Holz et al. (2010)		30.6793		1	1	1
-36.22	-73.67	1000	14532	114	13450	65	13700	60	250	88	12436	1014	65	1269	74	1045	4	BA (12.8-14.8)	SO161-SL22	De Pol-Holz et al. (2010)		33.7875		1	1	1
-36.22	-73.67	1000	14967	103	14050	90	14450	90	400	127	12560	1490	90	1885	123	1045	4	HS1 (15-17.5)	SO161-SL22	De Pol-Holz et al. (2010)		36.0794		1	1	1
-36.22	-73.67	1000	15216.5	86	14200	75	14650	90	450	117	12756	1444	75	1889	118.75	1045	4	HS1 (15-17.5)	SO161-SL22	De Pol-Holz et al. (2010)		37.1307		1	1	1
-36.22	-73.67	1000	15710.5	81	14650	65	15150	85	500	107	13104	1546	65	2044	111.5	1045	4	HS1 (15-17.5)	SO161-SL22	De Pol-Holz et al. (2010)		37.4272		1	1	1
-36.22	-73.67	1000	15969	81	14800	75	15050	75	250	106	13282	1518	75	1760	97.75	1045	4	HS1 (15-17.5)	SO161-SL22	De Pol-Holz et al. (2010)		38.7626		1	1	1
-36.22	-73.67	1000	16360.5	80	15100	75	15550	75	450	106	13572	1528	75	1983	100	1045	4	HS1 (15-17.5)	SO161-SL22	De Pol-Holz et al. (2010)		40.6467		1	1	1
-36.22	-73.67	1000	16658.5	82	15350	70	15850	100	500	122	13767	1583	70	2088	115.5	1045	4	HS1 (15-17.5)	SO161-SL22	De Pol-Holz et al. (2010)		41.1201		1	1	1
-36.22	-73.67	1000	17084	82	15700	80	16250	85	550	117	14088	1612	80	2179	126	1045	4	HS1 (15-17.5)	SO161-SL22	De Pol-Holz et al. (2010)		42.4374		1	1	1
-36.22	-73.67	1000	17490	88	16000	65	16550	75	550	99	14435	1565	65	2132	113.5	1045	4	HS1 (15-17.5)	SO161-SL22	De Pol-Holz et al. (2010)		43.4534		1	1	1
-36.22	-73.67	1000	18159	75	16100	75	16900	70	800	103	14761	1339	75	2115	147	1045	4		SO161-SL22	De Pol-Holz et al. (2010)		43.2293		1	1	1
-36.22	-73.67	1000	18682	58	16600	70	17100	75	500	103	15327	1273	70	1779	127	1045	4		SO161-SL22	De Pol-Holz et al. (2010)		43.2502		1	1	1
-36.22	-73.67	1000	18859	55	16850	75	17550	75	700	106	15587	1263	75	1963	115.5	1045	4		SO161-SL22	De Pol-Holz et al. (2010)		43.3745		1	1	1
-36.22	-73.67	1000	18974	60	16800	110	17550	90	750	142	15740	1060	110	1817	111.75	1045	4	LGM (19-21.8)	SO161-SL22	De Pol-Holz et al. (2010)		43.9022		1	1	1
-36.22	-73.67	1000	19098	71	16900	85	17750	85	850	120	15830	1070	85	1910	110.25	1045	4	LGM (19-21.8)	SO161-SL22	De Pol-Holz et al. (2010)		44.1407		1	1	1
-36.22	-73.67	1000	19494	82	17300	70	18000	100	700	122	16129	1171	70	1859	146	1045	4	LGM (19-21.8)	SO161-SL22	De Pol-Holz et al. (2010)		45.296	Reservoir age based on Siani et al. (2013)	1	1	1
41.73	142.55	978	10543	161	10000	140	10850	140	850	198	9316	684	140	1510	189	1849	3	EHOL (7-11)	CH84-14	Duplessy et al. (1989)		21.8154		1	1	1
41.73	142.55	978	11050	144	10230	140	11060	150	830	205	9542	688	140	1425	188.5	1849	3	EHOL (7-11)	CH84-14	Duplessy et al. (1989)		25.3394		1	1	1
41.73	142.55	978	11540.5	157	10640	150	11370	130	730	198	10033	607	150	1334	151.5	1849	3		CH84-14	Duplessy et al. (1989)		26.8619		1	1	1
41.73	142.55	978	12052.5	180	10870	150	11630	180	760	234	10330	540	150	1323	198.25	1849	3	YD (11.8-12.7)	CH84-14	Duplessy et al. (1989)		28.2099		1	1	1
41.73	142.55	978	13292.5	139	12180	160	13200	150	1020	219	11380	800	160	1779	220	1849	3	BA (12.8-14.8)	CH84-14	Duplessy et al. (1989)		30.0922		1	1	1
41.73	142.55	978	13828	163	12820	180	13010	170	190	248	12020	800	180	1048	222.5	1849	3	BA (12.8-14.8)	CH84-14	Duplessy et al. (1989)		31.0963		1	1	1
41.73	142.55	978	14245	171	12750	150	13930	220	1180	266	12322	428	150	1627	246.75	1849	3	BA (12.8-14.8)	CH84-14	Duplessy et al. (1989)		33.696		1	1	1
41.73	142.55	978	14732	172	13060	140	13500	200	440	244	12386	674	140	1038	210.5	1849	3	BA (12.8-14.8)	CH84-14	Duplessy et al. (1989)		34.6185		1	1	1
41.73	142.55	978	15599.5	179	13830	150	14140	200	310	250	13012	818	150	1114	235	1849	3	HS1 (15-17.5)	CH84-14	Duplessy et al. (1989)		35.2575		1	1	1
41.73	142.55	978	17765	226	15570	210	15940	190	370	283	14486	1084	210	1405	244.5	1849	3		CH84-14	Duplessy et al. (1989)		38.8404		1	1	1
34	-63	2372	12660.7	50	NaN	NaN	11500	30	NaN	NaN	10587	NaN	NaN	892	97.25	731	1	YD (11.8-12.7)	ALV-3887-1549-004-007	Eltgroth et al. (2006)		NaN		1	1	1
34	-63	2372	12680.7	50	NaN	NaN	11370	35	NaN	NaN	10624	NaN	NaN	737	110	731	1	YD (11.8-12.7)	ALV-3887-1549-004-007	Eltgroth et al. (2006)		NaN		1	1	1
34	-63	2372	12700	50	NaN	NaN	11460	30	NaN	NaN	10656	NaN	NaN	797	107.25	731	1	YD (11.8-12.7)	ALV-3887-1549-004-007	Eltgroth et al. (2006)		NaN		1	1	1
34	-63	2372	12673	35	NaN	NaN	11470	35	NaN	NaN	10606	NaN	NaN	850	73.5	731	1	YD (11.8-12.7)	ALV-3887-1549-004-009	Eltgroth et al. (2006)		NaN		1	1	1
34	-63	2372	12686	35	NaN	NaN	11340	30	NaN	NaN	10636	NaN	NaN	703	79.75	731	1	YD (11.8-12.7)	ALV-3887-1549-004-009	Eltgroth et al. (2006)		NaN		1	1	1
34	-63	2372	12700	35	NaN	NaN	11420	40	NaN	NaN	10656	NaN	NaN	757	93	731	1	YD (11.8-12.7)	ALV-3887-1549-004-009	Eltgroth et al. (2006)		NaN		1	1	1
34	-63	2372	12540	55	NaN	NaN	11380	30	NaN	NaN	10513	NaN	NaN	874	67.5	731	1	YD (11.8-12.7)	ALV-3887-1549-004-012	Eltgroth et al. (2006)		NaN		1	1	1
34	-63	2372	12567.4	55	NaN	NaN	11410	35	NaN	NaN	10472	NaN	NaN	894	66	731	1	YD (11.8-12.7)	ALV-3887-1549-004-012	Eltgroth et al. (2006)		NaN		1	1	1
34	-63	2372	12590	55	NaN	NaN	11340	35	NaN	NaN	10494	NaN	NaN	810	67.25	731	1	YD (11.8-12.7)	ALV-3887-1549-004-012	Eltgroth et al. (2006)		NaN		1	1	1
38	-60.5	1778	12180.3	150	NaN	NaN	11010	30	NaN	NaN	10378	NaN	NaN	647	69.5	677	1	YD (11.8-12.7)	ALV-3890-1407-003-001	Eltgroth et al. (2006)		NaN		1	1	1
38	-60.5	1778	12195.7	150	NaN	NaN	10780	30	NaN	NaN	10392	NaN	NaN	414	69.25	677	1	YD (11.8-12.7)	ALV-3890-1407-003-001	Eltgroth et al. (2006)		NaN		1	1	1
38	-60.5	1778	12220	150	NaN	NaN	11030	30	NaN	NaN	10405	NaN	NaN	659	69.75	677	1	YD (11.8-12.7)	ALV-3890-1407-003-001	Eltgroth et al. (2006)		NaN		1	1	1
39	-61	1176	11285.1	60	NaN	NaN	10070	35	NaN	NaN	9935	NaN	NaN	154	89.75	666	1		ALV-3891-1459-003-002	Eltgroth et al. (2006)		NaN		1	1	1
39	-61	1176	11308.2	60	NaN	NaN	9940	30	NaN	NaN	9932.6	NaN	NaN	3	15.75	666	1		ALV-3891-1459-003-002	Eltgroth et al. (2006)		NaN		1	1	1
39	-61	1176	11330	60	NaN	NaN	10000	25	NaN	NaN	9956	NaN	NaN	48	31	666	1		ALV-3891-1459-003-002	Eltgroth et al. (2006)		NaN		1	1	1
39	-61	1222	11418.9	65	NaN	NaN	10060	35	NaN	NaN	10046	NaN	NaN	55	30.5	664	1		ALV-3891-1758-006-003	Eltgroth et al. (2006)		NaN		1	1	1
39	-61	1222	11430.7	65	NaN	NaN	9970	30	NaN	NaN	10028	NaN	NaN	41	-16.5	664	1		ALV-3891-1758-006-003	Eltgroth et al. (2006)	Negative radcal error, poor convergence	NaN		0	0	0
39	-61	1222	11450	65	NaN	NaN	10040	25	NaN	NaN	10011	NaN	NaN	22	15	664	1		ALV-3891-1758-006-003	Eltgroth et al. (2006)		NaN		1	1	1
37.9583	-25.55	1152	11918.1	60	NaN	NaN	10780	40	NaN	NaN	10207	NaN	NaN	544	62.75	660	1	YD (11.8-12.7)	Smithsonian 48735.1	Eltgroth et al. (2006)		NaN	depth was given in a range: 1069-1235	1	1	1
37.9583	-25.55	1152	11929.7	60	NaN	NaN	10420	30	NaN	NaN	10215	NaN	NaN	175	56.25	660	1	YD (11.8-12.7)	Smithsonian 48735.1	Eltgroth et al. (2006)		NaN		1	1	1
37.9583	-25.55	1152	11935.8	60	NaN	NaN	10500	40	NaN	NaN	10234	NaN	NaN	249	62.25	660	1	YD (11.8-12.7)	Smithsonian 48735.1	Eltgroth et al. (2006)		NaN		1	1	1
37.9583	-25.55	1152	11942.9	60	NaN	NaN	10370	30	NaN	NaN	10262	NaN	NaN	113	55.75	660	1	YD (11.8-12.7)	Smithsonian 48735.1	Eltgroth et al. (2006)		NaN		1	1	1
37.9583	-25.55	1152	11948.8	60	NaN	NaN	10660	35	NaN	NaN	10278	NaN	NaN	398	58.5	660	1	YD (11.8-12.7)	Smithsonian 48735.1	Eltgroth et al. (2006)		NaN		1	1	1
37.9583	-25.55	1152	11953.6	60	NaN	NaN	10750	35	NaN	NaN	10282	NaN	NaN	484	58.25	660	1	YD (11.8-12.7)	Smithsonian 48735.1	Eltgroth et al. (2006)		NaN		1	1	1
37.9583	-25.55	1152	11960	60	NaN	NaN	10800	35	NaN	NaN	10277	NaN	NaN	528	58	660	1	YD (11.8-12.7)	Smithsonian 48735.1	Eltgroth et al. (2006)		NaN		1	1	1
62.817	-3.867	1179	11080	200	9998	57	10197	117	199	130	9623	375	57	534	193	563	1	EHOL (7-11)	JF-FI-19PC	Ezat et al. (2017)		9.11552	Cal age uncertainty guestimate	1	1	1
62.817	-3.867	1179	11820	200	NaN	NaN	10594	85	NaN	NaN	10167	NaN	NaN	421	136.5	563	1	YD (11.8-12.7)	JF-FI-19PC	Ezat et al. (2017)		8.95	Cal age uncertainty guestimate	1	1	1
62.817	-3.867	1179	12800	200	12293	62	12275	67	-18	91	10908	1385	62	1367	240.75	563	1		JF-FI-19PC	Ezat et al. (2017)	Negative B-P	11.4062	Cal age uncertainty guestimate	0	0	0
62.817	-3.867	1179	13760	200	12676	58	12717	68	41	89	11864	812	58	815	202	563	1	BA (12.8-14.8)	JF-FI-19PC	Ezat et al. (2017)		12.4273	Cal age uncertainty guestimate	1	1	1
62.817	-3.867	1179	13940	200	12901	63	12612	118	-289	134	12020	881	63	557	207.5	563	1	BA (12.8-14.8)	JF-FI-19PC	Ezat et al. (2017)	Negative B-P	12.5897	Cal age uncertainty guestimate	0	0	0
62.817	-3.867	1179	14250	200	12921	100	13046	100	125	141	12323	598	100	725	136.75	563	1	BA (12.8-14.8)	JF-FI-19PC	Ezat et al. (2017)		12.8772	Cal age uncertainty guestimate	1	1	1
62.817	-3.867	1179	14310	200	13174	66	13341	99	167	119	12353	821	66	996	156.25	563	1	BA (12.8-14.8)	JF-FI-19PC	Ezat et al. (2017)		12.963	Cal age uncertainty guestimate	1	1	1
62.817	-3.867	1179	14560	200	13474	108	13496	77	22	133	12449	1025	108	1071	105.25	563	1	BA (12.8-14.8)	JF-FI-19PC	Ezat et al. (2017)		13.1868	Cal age uncertainty guestimate	1	1	1
62.817	-3.867	1179	14860	200	NaN	NaN	13793	61	NaN	NaN	12494	NaN	NaN	1287	129.5	563	1		JF-FI-19PC	Ezat et al. (2017)		8.95	Cal age uncertainty guestimate	1	1	1
62.817	-3.867	1179	15430	200	NaN	NaN	14958.5	68	NaN	NaN	12910	NaN	NaN	2046.5	161.25	563	1	HS1 (15-17.5)	JF-FI-19PC	Ezat et al. (2017)		8.95	Cal age uncertainty guestimate	1	1	1
62.817	-3.867	1179	16460	200	14293	56	14901.5	64	608.5	85	13632	661	56	1267.5	146.25	563	1	HS1 (15-17.5)	JF-FI-19PC	Ezat et al. (2017)		12.819	Cal age uncertainty guestimate	1	1	1
62.817	-3.867	1179	16910	200	14561	57	15306	90	745	107	13873	688	57	1406	172.25	563	1	HS1 (15-17.5)	JF-FI-19PC	Ezat et al. (2017)		12.7144	Cal age uncertainty guestimate	1	1	1
62.817	-3.867	1179	17590	200	15225	64	15525	66	300	92	14465	760	64	1076	155	563	1	HS1 (15-17.5)	JF-FI-19PC	Ezat et al. (2017)		12.564	Cal age uncertainty guestimate	1	1	1
62.817	-3.867	1179	18160	200	15384	60	16305	147	921	159	14762	622	60	1467	258	563	1		JF-FI-19PC	Ezat et al. (2017)		12.4449	Cal age uncertainty guestimate	1	1	1
62.817	-3.867	1179	18730	200	15878	65	16155	77	277	101	15391	487	65	754	225.75	563	1		JF-FI-19PC	Ezat et al. (2017)		12.3332	Cal age uncertainty guestimate	1	1	1
62.817	-3.867	1179	19300	200	16323	82	16959	78	636	113	15985	338	82	969	195	563	1	LGM (19-21.8)	JF-FI-19PC	Ezat et al. (2017)		12.228	Cal age uncertainty guestimate	1	1	1
62.817	-3.867	1179	19870	200	17200	77	17551.5	78	351.5	110	16443	757	77	1090.5	174.75	563	1	LGM (19-21.8)	JF-FI-19PC	Ezat et al. (2017)		12.1288	Cal age uncertainty guestimate	1	1	1
62.817	-3.867	1179	20440	200	17904	87	18554	86	650	122	16893	1011	87	1640	191	563	1	LGM (19-21.8)	JF-FI-19PC	Ezat et al. (2017)		12.0352	Cal age uncertainty guestimate	1	1	1
62.817	-3.867	1179	21010	200	18931	88	19607	171	676	192	17472	1459	88	2172	236	563	1	LGM (19-21.8)	JF-FI-19PC	Ezat et al. (2017)		11.9467	Cal age uncertainty guestimate	1	1	1
62.817	-3.867	1179	26070	200	23610	143	23681	134	71	196	21954	1656	143	1788	293.75	563	1	preLGM (25-30)	JF-FI-19PC	Ezat et al. (2017)		11.4308	Cal age uncertainty guestimate	1	1	1
62.817	-3.867	1179	26330	200	23484	108	24098	195	614	223	22042	1442	108	1982	293	563	1	preLGM (25-30)	JF-FI-19PC	Ezat et al. (2017)		11.4128	Cal age uncertainty guestimate	1	1	1
62.817	-3.867	1179	26740	200	23962	170	24526	135	564	217	22366	1596	170	2104	207	563	1	preLGM (25-30)	JF-FI-19PC	Ezat et al. (2017)		11.3874	Cal age uncertainty guestimate	1	1	1
62.9755	-17.5895	1237	14670	200	NaN	NaN	14100	75	NaN	NaN	12477	NaN	NaN	1652	108.5	548	1	BA (12.8-14.8)	RAPiD-10-1P	Ezat et al. (2017)		45.2751	Cal age uncertainty guestimate	1	1	1
62.9755	-17.5895	1237	14840	200	NaN	NaN	13100	70	NaN	NaN	12477	NaN	NaN	602	130.75	548	1		RAPiD-10-1P	Ezat et al. (2017)		45.2751	Cal age uncertainty guestimate	1	1	1
62.9755	-17.5895	1237	14874	200	NaN	NaN	14050	75	NaN	NaN	12502	NaN	NaN	1535	139.25	548	1		RAPiD-10-1P	Ezat et al. (2017)		45.2751	Cal age uncertainty guestimate	1	1	1
62.9755	-17.5895	1237	16848	200	NaN	NaN	16200	75	NaN	NaN	13843	NaN	NaN	2341	163.5	548	1	HS1 (15-17.5)	RAPiD-10-1P	Ezat et al. (2017)		45.2751	Cal age uncertainty guestimate	1	1	1
62.9755	-17.5895	1237	17242	200	NaN	NaN	15650	100	NaN	NaN	14148	NaN	NaN	1469	195.75	548	1	HS1 (15-17.5)	RAPiD-10-1P	Ezat et al. (2017)		45.2751	Cal age uncertainty guestimate	1	1	1
62.9755	-17.5895	1237	17807	200	NaN	NaN	15750	80	NaN	NaN	14522	NaN	NaN	1201	153	548	1		RAPiD-10-1P	Ezat et al. (2017)		45.2751	Cal age uncertainty guestimate	1	1	1
62.9755	-17.5895	1237	17944	200	NaN	NaN	16850	110	NaN	NaN	14653	NaN	NaN	2208	218.5	548	1		RAPiD-10-1P	Ezat et al. (2017)		45.2751	Cal age uncertainty guestimate	1	1	1
62.9755	-17.5895	1237	18081	200	NaN	NaN	15800	75	NaN	NaN	14715	NaN	NaN	1066	220.5	548	1		RAPiD-10-1P	Ezat et al. (2017)		45.2751	Cal age uncertainty guestimate	1	1	1
62.9755	-17.5895	1237	18372	200	NaN	NaN	15950	60	NaN	NaN	15238	NaN	NaN	808	206.5	548	1		RAPiD-10-1P	Ezat et al. (2017)		45.2751	Cal age uncertainty guestimate	1	1	1
62.9755	-17.5895	1237	18766	200	NaN	NaN	16700	70	NaN	NaN	15432	NaN	NaN	1249	226	548	1		RAPiD-10-1P	Ezat et al. (2017)		45.2751	Cal age uncertainty guestimate	1	1	1
-15.63	166.93	150	37724	68	NaN	NaN	34090	630	NaN	NaN	33314	NaN	NaN	788	626.75	571	4		AK-AA-1	Fairbanks et al., 2005		NaN	R-age by Radcal	1	1	1
-15.63	166.93	150	7518	17	NaN	NaN	6895	30	NaN	NaN	6664.8	NaN	NaN	254	44.5	571	4	EHOL (7-11)	AK-BC-2	Fairbanks et al., 2005		NaN	R-age by Radcal	1	1	1
-15.63	166.93	150	36091	67	NaN	NaN	32250	500	NaN	NaN	31646	NaN	NaN	588	515.25	571	4		AK-F-1	Fairbanks et al., 2005		NaN	R-age by Radcal	1	1	1
-15.63	166.93	150	33677	39	NaN	NaN	29730	230	NaN	NaN	29075	NaN	NaN	650	249.75	571	4		AK-L-1	Fairbanks et al., 2005		NaN	R-age by Radcal	1	1	1
-15.63	166.93	150	48183	102	NaN	NaN	46060	630	NaN	NaN	45887	NaN	NaN	149	728	571	4		ARA04-43E	Fairbanks et al., 2005		NaN	R-age by Radcal	1	1	1
1.99	-157.78	150	11859	26	NaN	NaN	10540	30	NaN	NaN	10199	NaN	NaN	337	41.5	587	3	YD (11.8-12.7)	CHR 4-1-7	Fairbanks et al., 2005		NaN	R-age by Radcal	1	1	1
1.99	-157.78	150	12461	23	NaN	NaN	10730	30	NaN	NaN	10398	NaN	NaN	321	63.75	587	3	YD (11.8-12.7)	CHR 4-2-4	Fairbanks et al., 2005		NaN	R-age by Radcal	1	1	1
1.99	-157.78	150	12716	28	NaN	NaN	11280	30	NaN	NaN	10686	NaN	NaN	584	85.25	587	3	YD (11.8-12.7)	CHR 4-2-7	Fairbanks et al., 2005		NaN	R-age by Radcal	1	1	1
1.99	-157.78	150	12836	25	NaN	NaN	11290	30	NaN	NaN	10950	NaN	NaN	343	46	587	3	BA (12.8-14.8)	CHR 4-2-9	Fairbanks et al., 2005		NaN	R-age by Radcal	1	1	1
1.99	-157.78	150	13650	45	NaN	NaN	11930	30	NaN	NaN	11814	NaN	NaN	110	59.5	587	3	BA (12.8-14.8)	CHR 4-3-15	Fairbanks et al., 2005		NaN	R-age by Radcal	1	1	1
1.99	-157.78	150	12961	30	NaN	NaN	11440	30	NaN	NaN	11039	NaN	NaN	396	37.75	587	3	BA (12.8-14.8)	CHR 4-3-1A	Fairbanks et al., 2005		NaN	R-age by Radcal	1	1	1
1.99	-157.78	150	12959	21	NaN	NaN	11420	30	NaN	NaN	11038	NaN	NaN	376	36	587	3	BA (12.8-14.8)	CHR 4-3-2	Fairbanks et al., 2005		NaN	R-age by Radcal	1	1	1
1.99	-157.78	150	12990	28	NaN	NaN	11410	30	NaN	NaN	11048	NaN	NaN	357	36.5	587	3	BA (12.8-14.8)	CHR 4-3-3	Fairbanks et al., 2005		NaN	R-age by Radcal	1	1	1
1.99	-157.78	150	13117	29	NaN	NaN	11660	30	NaN	NaN	11230	NaN	NaN	441	71	587	3	BA (12.8-14.8)	CHR 4-3-8	Fairbanks et al., 2005		NaN	R-age by Radcal	1	1	1
1.99	-157.78	150	11925	12	NaN	NaN	10560	30	NaN	NaN	10207	NaN	NaN	339	39.75	587	3	YD (11.8-12.7)	CHR 5-1-11A	Fairbanks et al., 2005		NaN	R-age by Radcal	1	1	1
1.99	-157.78	150	11527	25	NaN	NaN	10260	30	NaN	NaN	10042	NaN	NaN	222	38.25	587	3		CHR 5-1-3	Fairbanks et al., 2005		NaN	R-age by Radcal	1	1	1
1.99	-157.78	150	11548	21	NaN	NaN	10360	30	NaN	NaN	10033	NaN	NaN	326	37.5	587	3		CHR 5-1-5	Fairbanks et al., 2005		NaN	R-age by Radcal	1	1	1
1.99	-157.78	150	11805	38	NaN	NaN	10480	30	NaN	NaN	10124	NaN	NaN	326	49.5	587	3	YD (11.8-12.7)	CHR 5-1-8	Fairbanks et al., 2005		NaN	R-age by Radcal	1	1	1
1.99	-157.78	150	11949	21	NaN	NaN	10550	30	NaN	NaN	10279	NaN	NaN	286	44.75	587	3	YD (11.8-12.7)	CHR 5-1-9	Fairbanks et al., 2005		NaN	R-age by Radcal	1	1	1
1.99	-157.78	150	11591	15	NaN	NaN	10310	40	NaN	NaN	10010	NaN	NaN	287	47	587	3		CHR 5-2-2	Fairbanks et al., 2005		NaN	R-age by Radcal	1	1	1
1.99	-157.78	150	11931	18	NaN	NaN	10500	30	NaN	NaN	10218	NaN	NaN	265	43.75	587	3	YD (11.8-12.7)	CHR 5-2-3	Fairbanks et al., 2005		NaN	R-age by Radcal	1	1	1
1.99	-157.78	150	11996	26	NaN	NaN	10580	40	NaN	NaN	10296	NaN	NaN	278	46.25	587	3	YD (11.8-12.7)	CHR 5-2-4	Fairbanks et al., 2005		NaN	R-age by Radcal	1	1	1
1.99	-157.78	150	11571	24	NaN	NaN	10390	30	NaN	NaN	10027	NaN	NaN	362	38.25	587	3		CHR 6-1-2	Fairbanks et al., 2005		NaN	R-age by Radcal	1	1	1
1.99	-157.78	150	11697	25	NaN	NaN	10390	40	NaN	NaN	10081	NaN	NaN	309	48.25	587	3		CHR 6-1-2	Fairbanks et al., 2005		NaN	R-age by Radcal	1	1	1
1.99	-157.78	150	11569	28	NaN	NaN	10360	30	NaN	NaN	10027	NaN	NaN	330	38.75	587	3		CHR 6-1-3	Fairbanks et al., 2005		NaN	R-age by Radcal	1	1	1
1.99	-157.78	150	12611	38	NaN	NaN	10900	30	NaN	NaN	10534	NaN	NaN	356	58.25	587	3	YD (11.8-12.7)	CHR 6-2-10	Fairbanks et al., 2005		NaN	R-age by Radcal	1	1	1
1.99	-157.78	150	12172	30	NaN	NaN	10710	30	NaN	NaN	10368	NaN	NaN	337	39	587	3	YD (11.8-12.7)	CHR 6-2-5	Fairbanks et al., 2005		NaN	R-age by Radcal	1	1	1
1.99	-157.78	150	12287	29	NaN	NaN	10770	30	NaN	NaN	10420	NaN	NaN	377	40	587	3	YD (11.8-12.7)	CHR 6-2-6	Fairbanks et al., 2005		NaN	R-age by Radcal	1	1	1
1.99	-157.78	150	12526	40	NaN	NaN	10730	30	NaN	NaN	10551	NaN	NaN	222	59.5	587	3	YD (11.8-12.7)	CHR 6-2-7	Fairbanks et al., 2005		NaN	R-age by Radcal	1	1	1
1.99	-157.78	150	12553	47	NaN	NaN	10850	30	NaN	NaN	10475	NaN	NaN	341	57.75	587	3	YD (11.8-12.7)	CHR 6-2-8	Fairbanks et al., 2005		NaN	R-age by Radcal	1	1	1
1.99	-157.78	150	10612	17	NaN	NaN	9730	30	NaN	NaN	9427	NaN	NaN	319	39.75	587	3	EHOL (7-11)	CHR 7-1-2	Fairbanks et al., 2005		NaN	R-age by Radcal	1	1	1
1.99	-157.78	150	10615	26	NaN	NaN	9800	30	NaN	NaN	9424	NaN	NaN	394	43.25	587	3	EHOL (7-11)	CHR 7-1-4	Fairbanks et al., 2005		NaN	R-age by Radcal	1	1	1
1.99	-157.78	150	10642	19	NaN	NaN	9700	30	NaN	NaN	9384.2	NaN	NaN	293	40.25	587	3	EHOL (7-11)	CHR 7-1-5	Fairbanks et al., 2005		NaN	R-age by Radcal	1	1	1
1.99	-157.78	150	11625	23	NaN	NaN	10440	30	NaN	NaN	10065	NaN	NaN	383	43	587	3		CHR 7-1-7	Fairbanks et al., 2005		NaN	R-age by Radcal	1	1	1
1.99	-157.78	150	12081	42	NaN	NaN	10590	30	NaN	NaN	10340	NaN	NaN	249	39	587	3	YD (11.8-12.7)	CHR 7-2-2	Fairbanks et al., 2005		NaN	R-age by Radcal	1	1	1
1.99	-157.78	150	12199	41	NaN	NaN	10620	30	NaN	NaN	10402	NaN	NaN	238	39.75	587	3	YD (11.8-12.7)	CHR 7-2-6	Fairbanks et al., 2005		NaN	R-age by Radcal	1	1	1
1.99	-157.78	150	12223	25	NaN	NaN	10750	30	NaN	NaN	10399	NaN	NaN	360	38.75	587	3	YD (11.8-12.7)	CHR 7-2-8	Fairbanks et al., 2005		NaN	R-age by Radcal	1	1	1
1.99	-157.78	150	11730	19	NaN	NaN	10340	30	NaN	NaN	10091	NaN	NaN	240	40.75	587	3		CHR 7-3-2	Fairbanks et al., 2005		NaN	R-age by Radcal	1	1	1
1.99	-157.78	150	12433	27	NaN	NaN	10820	30	NaN	NaN	10368	NaN	NaN	448	51	587	3	YD (11.8-12.7)	CHR 7-4-3	Fairbanks et al., 2005		NaN	R-age by Radcal	1	1	1
1.99	-157.78	150	12785	30	NaN	NaN	11300	30	NaN	NaN	10913	NaN	NaN	398	66.5	587	3	BA (12.8-14.8)	CHR 7-4-5	Fairbanks et al., 2005		NaN	R-age by Radcal	1	1	1
1.99	-157.78	150	12838	47	NaN	NaN	11300	30	NaN	NaN	10957	NaN	NaN	352	60.75	587	3	BA (12.8-14.8)	CHR 7-5-2A	Fairbanks et al., 2005		NaN	R-age by Radcal	1	1	1
1.99	-157.78	150	12995	28	NaN	NaN	11500	30	NaN	NaN	11052	NaN	NaN	446	36.5	587	3	BA (12.8-14.8)	CHR 7-6-1	Fairbanks et al., 2005		NaN	R-age by Radcal	1	1	1
1.99	-157.78	150	12942	48	NaN	NaN	11420	30	NaN	NaN	11044	NaN	NaN	387	46.5	587	3	BA (12.8-14.8)	CHR 7-6-3.1	Fairbanks et al., 2005		NaN	R-age by Radcal	1	1	1
1.99	-157.78	150	13709	24	NaN	NaN	12080	30	NaN	NaN	11820	NaN	NaN	254	41.25	587	3	BA (12.8-14.8)	CHR 7-7-1.1	Fairbanks et al., 2005		NaN	R-age by Radcal	1	1	1
1.99	-157.78	150	13397	33	NaN	NaN	11800	30	NaN	NaN	11512	NaN	NaN	275	46	587	3	BA (12.8-14.8)	CHR 7-7-2A.1	Fairbanks et al., 2005		NaN	R-age by Radcal	1	1	1
1.99	-157.78	150	13365	21	NaN	NaN	11770	30	NaN	NaN	11522	NaN	NaN	258	42.75	587	3	BA (12.8-14.8)	CHR 7-7-3A.1	Fairbanks et al., 2005		NaN	R-age by Radcal	1	1	1
13.04	-59.56	150	12816	37	NaN	NaN	11265	25	NaN	NaN	10907	NaN	NaN	339	54.75	331	1	BA (12.8-14.8)	RGF-12-14-2	Fairbanks et al., 2005		NaN	R-age by Radcal	1	1	1
13.04	-59.56	150	19345	53	NaN	NaN	16165	40	NaN	NaN	16000	NaN	NaN	159	59.5	331	1	LGM (19-21.8)	RGF-15-10-1	Fairbanks et al., 2005		NaN	R-age by Radcal	1	1	1
13.04	-59.55	150	19438	25	NaN	NaN	16155	40	NaN	NaN	16066	NaN	NaN	87	58	331	1	LGM (19-21.8)	RGF-15-10-1	Fairbanks et al., 2005		NaN	R-age by Radcal	1	1	1
13.04	-59.55	150	19450	36	NaN	NaN	16470	35	NaN	NaN	16078	NaN	NaN	389	62.25	331	1	LGM (19-21.8)	RGF-15-10-2	Fairbanks et al., 2005		NaN	R-age by Radcal	1	1	1
13.04	-59.55	150	19203	37	NaN	NaN	16170	40	NaN	NaN	15946	NaN	NaN	227	60.5	331	1	LGM (19-21.8)	RGF-15-10-3	Fairbanks et al., 2005		NaN	R-age by Radcal	1	1	1
13.04	-59.55	150	19581	26	NaN	NaN	16475	45	NaN	NaN	16274	NaN	NaN	200	80.25	331	1	LGM (19-21.8)	RGF-15-12-2	Fairbanks et al., 2005		NaN	R-age by Radcal	1	1	1
13.04	-59.55	150	19337	23	NaN	NaN	16465	40	NaN	NaN	15996	NaN	NaN	466	53.5	331	1	LGM (19-21.8)	RGF-15-12-4	Fairbanks et al., 2005		NaN	R-age by Radcal	1	1	1
13.04	-59.56	150	19684	39	NaN	NaN	16745	45	NaN	NaN	16381	NaN	NaN	375	65.5	331	1	LGM (19-21.8)	RGF-15-13-4	Fairbanks et al., 2005		NaN	R-age by Radcal	1	1	1
13.04	-59.55	150	19434	30	NaN	NaN	16855	40	NaN	NaN	16062	NaN	NaN	790	60	331	1	LGM (19-21.8)	RGF-15-13-6	Fairbanks et al., 2005		NaN	R-age by Radcal	1	1	1
13.04	-59.55	150	19483	27	NaN	NaN	16975	45	NaN	NaN	16115	NaN	NaN	858	66.5	331	1	LGM (19-21.8)	RGF-15-14-3	Fairbanks et al., 2005		NaN	R-age by Radcal	1	1	1
13.04	-59.55	150	19638	25	NaN	NaN	16980	35	NaN	NaN	16368	NaN	NaN	618	64.25	331	1	LGM (19-21.8)	RGF-15-14-4	Fairbanks et al., 2005		NaN	R-age by Radcal	1	1	1
13.04	-59.55	150	19443	30	NaN	NaN	16985	35	NaN	NaN	16071	NaN	NaN	911	57.75	331	1	LGM (19-21.8)	RGF-15-14-5	Fairbanks et al., 2005		NaN	R-age by Radcal	1	1	1
13.04	-59.55	150	19595	44	NaN	NaN	17025	40	NaN	NaN	16302	NaN	NaN	726	89	331	1	LGM (19-21.8)	RGF-15-15-3	Fairbanks et al., 2005		NaN	R-age by Radcal	1	1	1
13.04	-59.55	150	19627	34	NaN	NaN	17150	45	NaN	NaN	16355	NaN	NaN	804	77.25	331	1	LGM (19-21.8)	RGF-15-15-5	Fairbanks et al., 2005		NaN	R-age by Radcal	1	1	1
13.04	-59.55	150	19913	34	NaN	NaN	17220	40	NaN	NaN	16506	NaN	NaN	718	69.25	331	1	LGM (19-21.8)	RGF-15-15-8	Fairbanks et al., 2005		NaN	R-age by Radcal	1	1	1
13.04	-59.55	150	20082	27	NaN	NaN	17175	40	NaN	NaN	16610	NaN	NaN	563	61.75	331	1	LGM (19-21.8)	RGF-15-15-9	Fairbanks et al., 2005		NaN	R-age by Radcal	1	1	1
13.04	-59.55	150	20575	31	NaN	NaN	17825	55	NaN	NaN	17083	NaN	NaN	745	76.5	331	1	LGM (19-21.8)	RGF-15-17-3	Fairbanks et al., 2005		NaN	R-age by Radcal	1	1	1
13.04	-59.55	150	20504	39	NaN	NaN	17980	60	NaN	NaN	16982	NaN	NaN	996	90.5	331	1	LGM (19-21.8)	RGF-15-19-2	Fairbanks et al., 2005		NaN	R-age by Radcal	1	1	1
13.04	-59.55	150	12533	26	NaN	NaN	10885	25	NaN	NaN	10535	NaN	NaN	366	44.25	331	1	YD (11.8-12.7)	RGF-15-2-4	Fairbanks et al., 2005		NaN	R-age by Radcal	1	1	1
13.04	-59.55	150	12844	29	NaN	NaN	11045	25	NaN	NaN	10976	NaN	NaN	89	43.5	331	1	BA (12.8-14.8)	RGF-15-4-1	Fairbanks et al., 2005		NaN	R-age by Radcal	1	1	1
13.04	-59.55	150	14685	22	NaN	NaN	12880	30	NaN	NaN	12465	NaN	NaN	418	54.75	331	1	BA (12.8-14.8)	RGF-15-7-1	Fairbanks et al., 2005		NaN	R-age by Radcal	1	1	1
13.04	-59.55	150	18494	36	NaN	NaN	15290	35	NaN	NaN	15153	NaN	NaN	133	67.75	331	1		RGF-15-8-1	Fairbanks et al., 2005		NaN	R-age by Radcal	1	1	1
13.05	-59.55	150	11512	17	NaN	NaN	10335	30	NaN	NaN	10059	NaN	NaN	293	38.75	331	1		RGF-16-12-6	Fairbanks et al., 2005		NaN	R-age by Radcal	1	1	1
13.04	-59.56	150	12179	33	NaN	NaN	10610	40	NaN	NaN	10377	NaN	NaN	234	47.25	331	1	YD (11.8-12.7)	RGF-9-1-2	Fairbanks et al., 2005		NaN	R-age by Radcal	1	1	1
13.04	-59.56	150	12029	30	NaN	NaN	10600	30	NaN	NaN	10313	NaN	NaN	281	37.25	331	1	YD (11.8-12.7)	RGF-9-1-6	Fairbanks et al., 2005		NaN	R-age by Radcal	1	1	1
13.04	-59.56	150	11756	53	NaN	NaN	10590	30	NaN	NaN	10133	NaN	NaN	470	53	331	1	YD (11.8-12.7)	RGF-9-1-7	Fairbanks et al., 2005		NaN	R-age by Radcal	1	1	1
13.04	-59.56	150	12186	42	NaN	NaN	10760	35	NaN	NaN	10374	NaN	NaN	382	43.5	331	1	YD (11.8-12.7)	RGF-9-1-8	Fairbanks et al., 2005		NaN	R-age by Radcal	1	1	1
13.04	-59.56	150	12239	87	NaN	NaN	10580	30	NaN	NaN	10365	NaN	NaN	199	42.25	331	1	YD (11.8-12.7)	RGF-9-1-8	Fairbanks et al., 2005		NaN	R-age by Radcal	1	1	1
13.04	-59.56	150	12015	24	NaN	NaN	10715	30	NaN	NaN	10318	NaN	NaN	402	36.5	331	1	YD (11.8-12.7)	RGF-9-2-3	Fairbanks et al., 2005		NaN	R-age by Radcal	1	1	1
13.04	-59.56	150	12017	32	NaN	NaN	10690	30	NaN	NaN	10317	NaN	NaN	377	38.5	331	1	YD (11.8-12.7)	RGF-9-2-3	Fairbanks et al., 2005		NaN	R-age by Radcal	1	1	1
13.04	-59.56	150	12091	28	NaN	NaN	10905	35	NaN	NaN	10329	NaN	NaN	559	41.25	331	1	YD (11.8-12.7)	RGF-9-2-5	Fairbanks et al., 2005		NaN	R-age by Radcal	1	1	1
13.04	-59.56	150	12103	39	NaN	NaN	10850	35	NaN	NaN	10361	NaN	NaN	500	42	331	1	YD (11.8-12.7)	RGF-9-2-5	Fairbanks et al., 2005		NaN	R-age by Radcal	1	1	1
13.04	-59.56	150	12327	45	NaN	NaN	10770	30	NaN	NaN	10388	NaN	NaN	384	41	331	1	YD (11.8-12.7)	RGF-9-2-7	Fairbanks et al., 2005		NaN	R-age by Radcal	1	1	1
13.04	-59.56	150	12290	28	NaN	NaN	10770	30	NaN	NaN	10417	NaN	NaN	376	40	331	1	YD (11.8-12.7)	RGF-9-2-7 rep	Fairbanks et al., 2005		NaN	R-age by Radcal	1	1	1
13.04	-59.56	150	18116	37	NaN	NaN	15320	30	NaN	NaN	14727	NaN	NaN	587	56.25	331	1		RGF-9-20-2	Fairbanks et al., 2005		NaN	R-age by Radcal	1	1	1
13.04	-59.56	150	18218	44	NaN	NaN	15400	35	NaN	NaN	14881	NaN	NaN	514	122.75	331	1		RGF-9-21-10	Fairbanks et al., 2005		NaN	R-age by Radcal	1	1	1
13.04	-59.56	150	18176	56	NaN	NaN	15405	30	NaN	NaN	14786	NaN	NaN	610	114	331	1		RGF-9-21-11	Fairbanks et al., 2005		NaN	R-age by Radcal	1	1	1
13.04	-59.56	150	19075	55	NaN	NaN	16335	45	NaN	NaN	15810	NaN	NaN	519	74.25	331	1	LGM (19-21.8)	RGF-9-27-5-rep	Fairbanks et al., 2005		NaN	R-age by Radcal	1	1	1
13.04	-59.56	150	12303	14	NaN	NaN	10785	25	NaN	NaN	10384	NaN	NaN	395	37.25	331	1	YD (11.8-12.7)	RGF-9-3-2	Fairbanks et al., 2005		NaN	R-age by Radcal	1	1	1
13.04	-59.56	150	12680	75	NaN	NaN	11030	35	NaN	NaN	10622	NaN	NaN	396	128.75	331	1	YD (11.8-12.7)	RGF-9-3-4	Fairbanks et al., 2005		NaN	R-age by Radcal	1	1	1
13.04	-59.56	150	21858	41	NaN	NaN	18590	40	NaN	NaN	17921	NaN	NaN	669	65.25	331	1		RGF-9-34-10	Fairbanks et al., 2005		NaN	R-age by Radcal	1	1	1
13.04	-59.56	150	21714	41	NaN	NaN	18550	40	NaN	NaN	17813	NaN	NaN	730	63.25	331	1	LGM (19-21.8)	RGF-9-34-7	Fairbanks et al., 2005		NaN	R-age by Radcal	1	1	1
13.04	-59.56	150	21802	41	NaN	NaN	18585	40	NaN	NaN	17879	NaN	NaN	705	65.25	331	1	LGM (19-21.8)	RGF-9-34-8	Fairbanks et al., 2005		NaN	R-age by Radcal	1	1	1
13.04	-59.56	150	21922	41	NaN	NaN	18670	40	NaN	NaN	17964	NaN	NaN	703	68	331	1		RGF-9-35-2	Fairbanks et al., 2005		NaN	R-age by Radcal	1	1	1
13.04	-59.56	150	22010	36	NaN	NaN	18670	40	NaN	NaN	18045	NaN	NaN	621	72	331	1		RGF-9-35-2 rep	Fairbanks et al., 2005		NaN	R-age by Radcal	1	1	1
13.04	-59.56	150	22160	62	NaN	NaN	18750	40	NaN	NaN	18206	NaN	NaN	544	81	331	1		RGF-9-35-6	Fairbanks et al., 2005		NaN	R-age by Radcal	1	1	1
13.04	-59.56	150	22574	48	NaN	NaN	19360	40	NaN	NaN	18736	NaN	NaN	629	78.5	331	1		RGF-9-37-3	Fairbanks et al., 2005		NaN	R-age by Radcal	1	1	1
13.04	-59.56	150	23044	37	NaN	NaN	19820	40	NaN	NaN	19191	NaN	NaN	631	90.5	331	1		RGF-9-38-1	Fairbanks et al., 2005		NaN	R-age by Radcal	1	1	1
13.04	-59.56	150	23296	61	NaN	NaN	19720	40	NaN	NaN	19382	NaN	NaN	332	80	331	1		RGF-9-38-2	Fairbanks et al., 2005		NaN	R-age by Radcal	1	1	1
13.04	-59.56	150	23039	38	NaN	NaN	19750	40	NaN	NaN	19183	NaN	NaN	568	94	331	1		RGF-9-38-3	Fairbanks et al., 2005		NaN	R-age by Radcal	1	1	1
13.04	-59.56	150	23867	44	NaN	NaN	20310	50	NaN	NaN	19915	NaN	NaN	399	105.5	331	1		RGF-9-39-2	Fairbanks et al., 2005		NaN	R-age by Radcal	1	1	1
13.04	-59.56	150	23858	69	NaN	NaN	20260	40	NaN	NaN	19899	NaN	NaN	364	142.5	331	1		RGF-9-39-3	Fairbanks et al., 2005		NaN	R-age by Radcal	1	1	1
13.04	-59.56	150	24883	55	NaN	NaN	21080	40	NaN	NaN	20602	NaN	NaN	468	67.5	331	1		RGF-9-39-4	Fairbanks et al., 2005		NaN	R-age by Radcal	1	1	1
13.04	-59.56	150	24579	41	NaN	NaN	20930	50	NaN	NaN	20425	NaN	NaN	501	83	331	1		RGF-9-39-5	Fairbanks et al., 2005		NaN	R-age by Radcal	1	1	1
13.04	-59.56	150	25866	53	NaN	NaN	21790	50	NaN	NaN	21537	NaN	NaN	250	136	331	1	preLGM (25-30)	RGF-9-41-10	Fairbanks et al., 2005		NaN	R-age by Radcal	1	1	1
13.04	-59.56	150	25645	40	NaN	NaN	21670	50	NaN	NaN	21212	NaN	NaN	453	89	331	1	preLGM (25-30)	RGF-9-41-3	Fairbanks et al., 2005		NaN	R-age by Radcal	1	1	1
13.04	-59.56	150	25741	53	NaN	NaN	21760	50	NaN	NaN	21358	NaN	NaN	403	104.5	331	1	preLGM (25-30)	RGF-9-41-9	Fairbanks et al., 2005		NaN	R-age by Radcal	1	1	1
13.04	-59.56	150	14100	27	NaN	NaN	12615	40	NaN	NaN	12228	NaN	NaN	393	58.25	331	1	BA (12.8-14.8)	RGF-9-8-2	Fairbanks et al., 2005		NaN	R-age by Radcal	1	1	1
13.04	-59.55	150	17935	26	NaN	NaN	15090	45	NaN	NaN	14646	NaN	NaN	443	64	331	1		RGF15-10-5	Fairbanks et al., 2005		NaN	R-age by Radcal	1	1	1
13.04	-59.56	150	22536	46	NaN	NaN	19450	60	NaN	NaN	18702	NaN	NaN	752	96.25	331	1		RGF9-37-2	Fairbanks et al., 2005		NaN	R-age by Radcal	1	1	1
13.04	-59.56	150	25639	45	NaN	NaN	21680	50	NaN	NaN	21203	NaN	NaN	471	91.5	331	1	preLGM (25-30)	RGF9-41-8	Fairbanks et al., 2005		NaN	R-age by Radcal	1	1	1
-15.6	166.8	150	1249	10	NaN	NaN	1885	30	NaN	NaN	1283	NaN	NaN	612	33.5	571	4	HOL (<6)	S-C-4*	Fairbanks et al., 2005		NaN	R-age by Radcal	1	1	1
-15.6	166.8	150	3352	17	NaN	NaN	3490	35	NaN	NaN	3104	NaN	NaN	381	48	571	4	HOL (<6)	S-T-2*	Fairbanks et al., 2005		NaN	R-age by Radcal	1	1	1
-15.6	166.8	150	4521	29	NaN	NaN	4315	30	NaN	NaN	4040	NaN	NaN	269	48.25	571	4	HOL (<6)	S-W-2*	Fairbanks et al., 2005		NaN	R-age by Radcal	1	1	1
-15.6	166.8	150	5182	21	NaN	NaN	4775	35	NaN	NaN	4492.2	NaN	NaN	284	41.25	571	4	HOL (<6)	S-X-1*	Fairbanks et al., 2005		NaN	R-age by Radcal	1	1	1
-36.221	-73.675	1001	9354	131	NaN	NaN	9340	20	NaN	NaN	8330.4	NaN	NaN	1017	98.5	1045	4	EHOL (7-11)	22SL	Fontaine et al. (2019) PP		78.4314		1	1	1
-36.221	-73.675	1001	9558	137	NaN	NaN	9775	20	NaN	NaN	8689.2	NaN	NaN	1118	76.75	1045	4	EHOL (7-11)	22SL	Fontaine et al. (2019) PP		58.8235		1	1	1
-36.221	-73.675	1001	9830	156	NaN	NaN	9990	20	NaN	NaN	8813	NaN	NaN	1186	84.25	1045	4	EHOL (7-11)	22SL	Fontaine et al. (2019) PP		56.1403		1	1	1
-36.221	-73.675	1001	10115	153	NaN	NaN	10360	20	NaN	NaN	8875	NaN	NaN	1445	80.25	1045	4	EHOL (7-11)	22SL	Fontaine et al. (2019) PP		47.7454		1	1	1
-36.221	-73.675	1001	10492	170	NaN	NaN	10600	20	NaN	NaN	9263	NaN	NaN	1310	10.25	1045	4	EHOL (7-11)	22SL	Fontaine et al. (2019) PP		49.3827		1	1	1
-36.221	-73.675	1001	10978	165	NaN	NaN	10845	30	NaN	NaN	9533.4	NaN	NaN	1248	110	1045	4	EHOL (7-11)	22SL	Fontaine et al. (2019) PP		50.4202		1	1	1
-36.221	-73.675	1001	11335	172	NaN	NaN	11480	20	NaN	NaN	9957	NaN	NaN	1524	134	1045	4		22SL	Fontaine et al. (2019) PP		49.7738		1	1	1
-36.221	-73.675	1001	11556	172	NaN	NaN	11300	55	NaN	NaN	10027	NaN	NaN	1258	110.25	1045	4		22SL	Fontaine et al. (2019) PP		51.5098		1	1	1
-36.221	-73.675	1001	12119	192	NaN	NaN	12240	210	NaN	NaN	10362	NaN	NaN	1907	223.75	1045	4	YD (11.8-12.7)	22SL	Fontaine et al. (2019) PP		55.0459		1	1	1
-36.221	-73.675	1001	12228	200	NaN	NaN	12185	45	NaN	NaN	10388	NaN	NaN	1815	108.25	1045	4	YD (11.8-12.7)	22SL	Fontaine et al. (2019) PP		55.1724		1	1	1
-36.221	-73.675	1001	12373	205	NaN	NaN	12245	25	NaN	NaN	10371	NaN	NaN	1845	116.25	1045	4	YD (11.8-12.7)	22SL	Fontaine et al. (2019) PP		54.3478		1	1	1
-36.221	-73.675	1001	12557	211	NaN	NaN	12400	45	NaN	NaN	10473	NaN	NaN	1878	121.75	1045	4	YD (11.8-12.7)	22SL	Fontaine et al. (2019) PP		53.9112		1	1	1
-36.221	-73.675	1001	13503	190	NaN	NaN	13400	60	NaN	NaN	11666	NaN	NaN	1745	205.5	1045	4	BA (12.8-14.8)	22SL	Fontaine et al. (2019) PP		75.4286		1	1	1
-36.221	-73.675	1001	14378	192	NaN	NaN	13700	60	NaN	NaN	12397	NaN	NaN	1322	116.5	1045	4	BA (12.8-14.8)	22SL	Fontaine et al. (2019) PP		69.4051		1	1	1
-36.221	-73.675	1001	15084	147	NaN	NaN	14450	90	NaN	NaN	12645	NaN	NaN	1794	147.25	1045	4	HS1 (15-17.5)	22SL	Fontaine et al. (2019) PP		71.4286		1	1	1
-36.221	-73.675	1001	15434	135	NaN	NaN	14650	90	NaN	NaN	12911	NaN	NaN	1736	130.75	1045	4	HS1 (15-17.5)	22SL	Fontaine et al. (2019) PP		65.7143		1	1	1
-36.221	-73.675	1001	15784	126	NaN	NaN	15150	85	NaN	NaN	13165	NaN	NaN	1987	129	1045	4	HS1 (15-17.5)	22SL	Fontaine et al. (2019) PP		78.8804		1	1	1
-36.221	-73.675	1001	16177	118	NaN	NaN	15050	75	NaN	NaN	13421	NaN	NaN	1621	115	1045	4	HS1 (15-17.5)	22SL	Fontaine et al. (2019) PP		79.4473		1	1	1
-36.221	-73.675	1001	16756	127	NaN	NaN	15550	100	NaN	NaN	13813	NaN	NaN	1740	125.75	1045	4	HS1 (15-17.5)	22SL	Fontaine et al. (2019) PP		72.7273		1	1	1
-36.221	-73.675	1001	17031	123	NaN	NaN	15850	75	NaN	NaN	13990	NaN	NaN	1847	134.75	1045	4	HS1 (15-17.5)	22SL	Fontaine et al. (2019) PP		69.0846		1	1	1
-36.221	-73.675	1001	17610	121	NaN	NaN	16250	85	NaN	NaN	14464	NaN	NaN	1792	110.5	1045	4	HS1 (15-17.5)	22SL	Fontaine et al. (2019) PP		80.6452		1	1	1
-36.221	-73.675	1001	18044	126	NaN	NaN	16550	75	NaN	NaN	14702	NaN	NaN	1845	162.25	1045	4		22SL	Fontaine et al. (2019) PP		64.5995		1	1	1
-36.221	-73.675	1001	18431	125	NaN	NaN	16900	70	NaN	NaN	15232	NaN	NaN	1723	144.25	1045	4		22SL	Fontaine et al. (2019) PP		58.0808		1	1	1
-36.221	-73.675	1001	18827	113	NaN	NaN	17100	90	NaN	NaN	15531	NaN	NaN	1563	182.5	1045	4		22SL	Fontaine et al. (2019) PP		60.241		1	1	1
-36.221	-73.675	1001	18993	109	NaN	NaN	17550	75	NaN	NaN	15755	NaN	NaN	1801	143	1045	4	LGM (19-21.8)	22SL	Fontaine et al. (2019) PP		72.4638		1	1	1
-36.221	-73.675	1001	19200	115	NaN	NaN	17550	90	NaN	NaN	15944	NaN	NaN	1624	126.75	1045	4	LGM (19-21.8)	22SL	Fontaine et al. (2019) PP		76.9231		1	1	1
-36.221	-73.675	1001	19330	117	NaN	NaN	17750	85	NaN	NaN	15994	NaN	NaN	1744	127.5	1045	4	LGM (19-21.8)	22SL	Fontaine et al. (2019) PP		80.1282		1	1	1
-36.221	-73.675	1001	19642	129	NaN	NaN	17250	330	NaN	NaN	16372	NaN	NaN	948	345.5	1045	4	LGM (19-21.8)	22SL	Fontaine et al. (2019) PP		92.5926		1	1	1
-36.221	-73.675	1001	19804	135	NaN	NaN	18000	100	NaN	NaN	16361	NaN	NaN	1590	145.25	1045	4	LGM (19-21.8)	22SL	Fontaine et al. (2019) PP		92.5926		1	1	1
-31.4857	-72	3086	1151	134	NaN	NaN	2945	35	NaN	NaN	1221	NaN	NaN	1719	10.25	1748	4	HOL (<6)	GeoB 7149-2	Fontaine et al. (2019) PP		24.7525		1	1	1
-31.4857	-72	3086	1353	150	NaN	NaN	3530	80	NaN	NaN	1479	NaN	NaN	2056	175.5	1748	4	HOL (<6)	GeoB 7149-2	Fontaine et al. (2019) PP		16.8634		1	1	1
-31.4857	-72	3086	3132	152	NaN	NaN	4750	60	NaN	NaN	2938	NaN	NaN	1784	130.25	1748	4	HOL (<6)	GeoB 7149-2	Fontaine et al. (2019) PP		18.0505		1	1	1
-31.4857	-72	3086	3686	136	NaN	NaN	5435	30	NaN	NaN	3414	NaN	NaN	1996	113.75	1748	4	HOL (<6)	GeoB 7149-2	Fontaine et al. (2019) PP		27.7778		1	1	1
-31.4857	-72	3086	3866	117	NaN	NaN	5180	90	NaN	NaN	3567	NaN	NaN	1609	126.5	1748	4	HOL (<6)	GeoB 7149-2	Fontaine et al. (2019) PP		17.7148		1	1	1
-31.4857	-72	3086	4995	188	NaN	NaN	6330	190	NaN	NaN	4440	NaN	NaN	1929	234.25	1748	4	HOL (<6)	GeoB 7149-2	Fontaine et al. (2019) PP		21.692		1	1	1
-31.4857	-72	3086	5917	267	NaN	NaN	7190	25	NaN	NaN	5158.4	NaN	NaN	2018	48.5	1748	4	HOL (<6)	GeoB 7149-2	Fontaine et al. (2019) PP		21.692		1	1	1
-31.4857	-72	3086	5917	267	NaN	NaN	7810	70	NaN	NaN	5158.4	NaN	NaN	2642	261	1748	4	HOL (<6)	GeoB 7149-2	Fontaine et al. (2019) PP		22.0751		1	1	1
-31.4857	-72	3086	6370	223	NaN	NaN	8590	100	NaN	NaN	5581	NaN	NaN	2996	226	1748	4		GeoB 7149-2	Fontaine et al. (2019) PP		15.1057		1	1	1
-31.4857	-72	3086	8025	203	NaN	NaN	8975	50	NaN	NaN	7251	NaN	NaN	1737	213.75	1748	4	EHOL (7-11)	GeoB 7149-2	Fontaine et al. (2019) PP		29.4861		1	1	1
-31.4857	-72	3086	9212	178	NaN	NaN	9940	190	NaN	NaN	8236	NaN	NaN	1699	239.75	1748	4	EHOL (7-11)	GeoB 7149-2	Fontaine et al. (2019) PP		17.301		1	1	1
-31.4857	-72	3086	9501	15	NaN	NaN	10940	130	NaN	NaN	8497.6	NaN	NaN	2455	130.75	1748	4	EHOL (7-11)	GeoB 7149-2	Fontaine et al. (2019) PP		13.089		1	1	1
-31.4857	-72	3086	9883	160	NaN	NaN	10790	70	NaN	NaN	8788.8	NaN	NaN	1960	113.75	1748	4	EHOL (7-11)	GeoB 7149-2	Fontaine et al. (2019) PP		13.089		1	1	1
-31.4857	-72	3086	9883	160	NaN	NaN	11420	630	NaN	NaN	8788.8	NaN	NaN	2591	624	1748	4	EHOL (7-11)	GeoB 7149-2	Fontaine et al. (2019) PP		37.9147		1	1	1
-31.4857	-72	3086	10938	159	NaN	NaN	11290	90	NaN	NaN	9608.6	NaN	NaN	1703	134.75	1748	4	EHOL (7-11)	GeoB 7149-2	Fontaine et al. (2019) PP		35.6993		1	1	1
-31.4857	-72	3086	13319	158	NaN	NaN	13580	170	NaN	NaN	11461	NaN	NaN	2130	247	1748	4	BA (12.8-14.8)	GeoB 7149-2	Fontaine et al. (2019) PP		33.9674		1	1	1
-31.4857	-72	3086	14055	219	NaN	NaN	15520	160	NaN	NaN	12141	NaN	NaN	3364	233.75	1748	4	BA (12.8-14.8)	GeoB 7149-2	Fontaine et al. (2019) PP		37.9107		1	1	1
-31.4857	-72	3086	15242	243	NaN	NaN	15700	370	NaN	NaN	12777	NaN	NaN	2922	402.25	1748	4	HS1 (15-17.5)	GeoB 7149-2	Fontaine et al. (2019) PP		40.1606		1	1	1
-31.4857	-72	3086	15989	302	NaN	NaN	15580	180	NaN	NaN	13299	NaN	NaN	2272	274.5	1748	4	HS1 (15-17.5)	GeoB 7149-2	Fontaine et al. (2019) PP		40.1606		1	1	1
-36.542	-73.675	798	14684	201	NaN	NaN	13750	95	NaN	NaN	12466	NaN	NaN	1298	124.25	883	4	BA (12.8-14.8)	GeoB 7162-6	Fontaine et al. (2019) PP		91.2982		1	1	1
-36.542	-73.675	798	15385	125	NaN	NaN	16550	80	NaN	NaN	12898	NaN	NaN	3665	120	883	4	HS1 (15-17.5)	GeoB 7162-6	Fontaine et al. (2019) PP		102.564		1	1	1
-36.542	-73.675	798	15658	113	NaN	NaN	15100	100	NaN	NaN	13063	NaN	NaN	2036	135	883	4	HS1 (15-17.5)	GeoB 7162-6	Fontaine et al. (2019) PP		100		1	1	1
-36.542	-73.675	798	15778	113	NaN	NaN	15300	110	NaN	NaN	13159	NaN	NaN	2142	141	883	4	HS1 (15-17.5)	GeoB 7162-6	Fontaine et al. (2019) PP		77.3481		1	1	1
-36.542	-73.675	798	16321	133	NaN	NaN	15550	75	NaN	NaN	13536	NaN	NaN	2014	123	883	4	HS1 (15-17.5)	GeoB 7162-6	Fontaine et al. (2019) PP		82.5688		1	1	1
-36.542	-73.675	798	16539	155	NaN	NaN	15520	75	NaN	NaN	13677	NaN	NaN	1835	126.5	883	4	HS1 (15-17.5)	GeoB 7162-6	Fontaine et al. (2019) PP		82.5688		1	1	1
-36.4257	-73.5955	537	16938	170	NaN	NaN	15600	260	NaN	NaN	13891	NaN	NaN	1668	289	765	4	HS1 (15-17.5)	GeoB 7163-7	Fontaine et al. (2019) PP		26.643		1	1	1
-36.4257	-73.5955	537	17501	160	NaN	NaN	15570	170	NaN	NaN	14443	NaN	NaN	1174	206.5	765	4	HS1 (15-17.5)	GeoB 7163-7	Fontaine et al. (2019) PP		701.754		1	1	1
-36.4257	-73.5955	537	17558	145	NaN	NaN	16040	320	NaN	NaN	14463	NaN	NaN	1612	328.75	765	4	HS1 (15-17.5)	GeoB 7163-7	Fontaine et al. (2019) PP		101.215		1	1	1
-36.4257	-73.5955	537	17805	136	NaN	NaN	16170	80	NaN	NaN	14520	NaN	NaN	1629	121.5	765	4		GeoB 7163-7	Fontaine et al. (2019) PP		107.527		1	1	1
-36.4257	-73.5955	537	18084	156	NaN	NaN	16220	70	NaN	NaN	14716	NaN	NaN	1488	199.5	765	4		GeoB 7163-7	Fontaine et al. (2019) PP		100.806		1	1	1
-36.4257	-73.5955	537	18332	169	NaN	NaN	16460	140	NaN	NaN	15200	NaN	NaN	1365	232.5	765	4		GeoB 7163-7	Fontaine et al. (2019) PP		83.3333		1	1	1
-36.4257	-73.5955	537	18632	169	NaN	NaN	16590	60	NaN	NaN	15215	NaN	NaN	1320	189.25	765	4		GeoB 7163-7	Fontaine et al. (2019) PP		100.671		1	1	1
-36.4257	-73.5955	537	18930	184	NaN	NaN	16790	80	NaN	NaN	15694	NaN	NaN	1105	225	765	4	LGM (19-21.8)	GeoB 7163-7	Fontaine et al. (2019) PP		98.8701		1	1	1
-36.4257	-73.5955	537	19284	196	NaN	NaN	16930	90	NaN	NaN	15982	NaN	NaN	950	197.75	765	4	LGM (19-21.8)	GeoB 7163-7	Fontaine et al. (2019) PP		96.5251		1	1	1
-36.4257	-73.5955	537	19543	241	NaN	NaN	17290	70	NaN	NaN	16201	NaN	NaN	1077	204.75	765	4	LGM (19-21.8)	GeoB 7163-7	Fontaine et al. (2019) PP		87.3362		1	1	1
-36.4257	-73.5955	537	19772	241	NaN	NaN	17680	70	NaN	NaN	16346	NaN	NaN	1284	205.25	765	4	LGM (19-21.8)	GeoB 7163-7	Fontaine et al. (2019) PP		87.3362		1	1	1
-36.4532	-73.925	2062	9064	231	NaN	NaN	9980	110	NaN	NaN	8146.6	NaN	NaN	1843	202	1672	4	EHOL (7-11)	GeoB 7167-6	Fontaine et al. (2019) PP		43.7063		1	1	1
-36.4532	-73.925	2062	9064	231	NaN	NaN	10005	20	NaN	NaN	8146.6	NaN	NaN	1843	161.5	1672	4	EHOL (7-11)	GeoB 7167-6	Fontaine et al. (2019) PP		43.7063		1	1	1
-36.4532	-73.925	2062	10208	191	NaN	NaN	11015	35	NaN	NaN	9024	NaN	NaN	1985	148	1672	4	EHOL (7-11)	GeoB 7167-6	Fontaine et al. (2019) PP		43.7063		1	1	1
-36.4532	-73.925	2062	10208	191	NaN	NaN	11100	90	NaN	NaN	9024	NaN	NaN	2057	175.75	1672	4	EHOL (7-11)	GeoB 7167-6	Fontaine et al. (2019) PP		42.1941		1	1	1
-36.4532	-73.925	2062	10445	168	NaN	NaN	11425	35	NaN	NaN	9283	NaN	NaN	2167	47.25	1672	4	EHOL (7-11)	GeoB 7167-6	Fontaine et al. (2019) PP		32.8947		1	1	1
-36.4532	-73.925	2062	10597	149	NaN	NaN	11800	45	NaN	NaN	9414.4	NaN	NaN	2417	120.5	1672	4	EHOL (7-11)	GeoB 7167-6	Fontaine et al. (2019) PP		38.1679		1	1	1
-36.4532	-73.925	2062	10728	141	NaN	NaN	11570	45	NaN	NaN	9492.4	NaN	NaN	2077	108.75	1672	4	EHOL (7-11)	GeoB 7167-6	Fontaine et al. (2019) PP		43.1035		1	1	1
-36.4532	-73.925	2062	11076	127	NaN	NaN	12070	25	NaN	NaN	9615.8	NaN	NaN	2444	91	1672	4	EHOL (7-11)	GeoB 7167-6	Fontaine et al. (2019) PP		33.8983		1	1	1
-36.4532	-73.925	2062	11371	145	NaN	NaN	12250	30	NaN	NaN	9977.2	NaN	NaN	2274	25.25	1672	4		GeoB 7167-6	Fontaine et al. (2019) PP		33.67		1	1	1
-36.4532	-73.925	2062	11668	167	NaN	NaN	12460	100	NaN	NaN	10073	NaN	NaN	2372	131.75	1672	4	YD (11.8-12.7)	GeoB 7167-6	Fontaine et al. (2019) PP		33.67		1	1	1
-36.4532	-73.925	2062	11668	167	NaN	NaN	12575	30	NaN	NaN	10073	NaN	NaN	2496	92.25	1672	4	YD (11.8-12.7)	GeoB 7167-6	Fontaine et al. (2019) PP		23.0947		1	1	1
-36.4532	-73.925	2062	12101	190	NaN	NaN	13160	25	NaN	NaN	10352	NaN	NaN	2818	93.75	1672	4	YD (11.8-12.7)	GeoB 7167-6	Fontaine et al. (2019) PP		21.8818		1	1	1
-36.4532	-73.925	2062	12558	139	NaN	NaN	13195	30	NaN	NaN	10472	NaN	NaN	2675	115.75	1672	4	YD (11.8-12.7)	GeoB 7167-6	Fontaine et al. (2019) PP		16.835		1	1	1
-36.4532	-73.925	2062	13152	143	NaN	NaN	13690	30	NaN	NaN	11230	NaN	NaN	2422	151.25	1672	4	BA (12.8-14.8)	GeoB 7167-6	Fontaine et al. (2019) PP		32.6797		1	1	1
-36.4532	-73.925	2062	13458	115	NaN	NaN	13875	25	NaN	NaN	11579	NaN	NaN	2288	128.25	1672	4	BA (12.8-14.8)	GeoB 7167-6	Fontaine et al. (2019) PP		40.4858		1	1	1
-36.4532	-73.925	2062	13705	120	NaN	NaN	14210	30	NaN	NaN	11827	NaN	NaN	2369	120.5	1672	4	BA (12.8-14.8)	GeoB 7167-6	Fontaine et al. (2019) PP		30.9597		1	1	1
-36.4532	-73.925	2062	14028	163	NaN	NaN	14700	120	NaN	NaN	12082	NaN	NaN	2572	183.25	1672	4	BA (12.8-14.8)	GeoB 7167-6	Fontaine et al. (2019) PP		27.7447		1	1	1
-36.4532	-73.925	2062	16551	206	NaN	NaN	16460	90	NaN	NaN	13687	NaN	NaN	2767	160	1672	4	HS1 (15-17.5)	GeoB 7167-6	Fontaine et al. (2019) PP		30.9358		1	1	1
-36.4532	-73.925	2062	17844	187	NaN	NaN	17490	100	NaN	NaN	14561	NaN	NaN	2916	162	1672	4		GeoB 7167-6	Fontaine et al. (2019) PP		38.7297		1	1	1
-36.4532	-73.925	2062	20426	584	NaN	NaN	19640	70	NaN	NaN	16878	NaN	NaN	2708	33	1672	4	LGM (19-21.8)	GeoB 7167-6	Fontaine et al. (2019) PP		38.7297		1	1	1
54.62	-148.75	3647	9270	376	9305	25	9930	70	625	74	8249	1056	25	1645	288.5	2074	3	EHOL (7-11)	ODP887	Galbraith et al. (2007)		4.09924		1	1	1
54.62	-148.75	3647	12627	237	11810	30	13070	40	1260	50	10600	1210	30	2484	123.25	2074	3		ODP887	Galbraith et al. (2007)		4.03896		1	1	1
54.62	-148.75	3647	13296	100	12530	30	13565	45	1035	54	11388	1142	30	2142	124	2074	3	BA (12.8-14.8)	ODP887	Galbraith et al. (2007)		4.287		1	1	1
54.62	-148.75	3647	13828	174	12995	30	13940	70	945	76	12020	975	30	1971	175.25	2074	3	BA (12.8-14.8)	ODP887	Galbraith et al. (2007)		4.48366		1	1	1
54.62	-148.75	3647	16696	215	15010	50	16880	70	1870	86	13788	1222	50	3100	165.75	2074	3	HS1 (15-17.5)	ODP887	Galbraith et al. (2007)		5.74988		1	1	1
54.62	-148.75	3647	18421.5	396	16640	45	18290	120	1650	128	15238	1402	45	3131	392.5	2074	3		ODP887	Galbraith et al. (2007)		5.75415		1	1	1
54.62	-148.75	3647	18885.5	396	16405	45	18290	50	1885	67	15631	774	45	2635	360.5	2074	3	LGM (19-21.8)	ODP887	Galbraith et al. (2007)		5.87753		1	1	1
54.62	-148.75	3647	20120	241	17970	70	19580	180	1610	193	16640	1330	70	2929	262.75	2074	3	LGM (19-21.8)	ODP887	Galbraith et al. (2007)		5.81511		1	1	1
54.39	-148.92	3640	11773	90	11080	60	12205	30	1125	67	10148	932	60	2072	68	2074	3	YD (11.8-12.7)	MD02-2489	Gebhardt et al. (2008); Rae et al. (2014)		14.4778		1	1	1
54.39	-148.92	3640	12740	24	11870	30	13145	30	1275	42	10783	1087	30	2360	81.25	2074	3		MD02-2489	Gebhardt et al. (2008); Rae et al. (2014)		35.5731		1	1	1
54.39	-148.92	3640	12993	70	12120	70	13320	35	1200	78	11050	1070	70	2267	77.75	2074	3	BA (12.8-14.8)	MD02-2489	Gebhardt et al. (2008); Rae et al. (2014)		18.0053		1	1	1
54.39	-148.92	3640	13548.4	100	NaN	NaN	13640	80	NaN	NaN	11708	NaN	NaN	1933	134.5	2074	3	BA (12.8-14.8)	MD02-2489	Gebhardt et al. (2008); Rae et al. (2014)		34.2262		1	1	1
54.39	-148.92	3640	14571	100	NaN	NaN	14790	90	NaN	NaN	12454	NaN	NaN	2349	98	2074	3	BA (12.8-14.8)	MD02-2489	Gebhardt et al. (2008); Rae et al. (2014)		26.1982		1	1	1
54.39	-148.92	3640	14933.6	100	NaN	NaN	15620	100	NaN	NaN	12528	NaN	NaN	3080	128.75	2074	3	HS1 (15-17.5)	MD02-2489	Gebhardt et al. (2008); Rae et al. (2014)		22.1374		1	1	1
54.39	-148.92	3640	15475.7	100	NaN	NaN	15590	110	NaN	NaN	12925	NaN	NaN	2654	129.25	2074	3	HS1 (15-17.5)	MD02-2489	Gebhardt et al. (2008); Rae et al. (2014)		22.1374		1	1	1
54.39	-148.92	3640	15950	100	NaN	NaN	15810	110	NaN	NaN	13268	NaN	NaN	2532	131.25	2074	3	HS1 (15-17.5)	MD02-2489	Gebhardt et al. (2008); Rae et al. (2014)		16.0622		1	1	1
54.39	-148.92	3640	16199	100	NaN	NaN	15080	100	NaN	NaN	13436	NaN	NaN	1636	125	2074	3	HS1 (15-17.5)	MD02-2489	Gebhardt et al. (2008); Rae et al. (2014)		16.0622		1	1	1
54.39	-148.92	3640	16510.3	100	NaN	NaN	15450	100	NaN	NaN	13657	NaN	NaN	1784	123	2074	3	HS1 (15-17.5)	MD02-2489	Gebhardt et al. (2008); Rae et al. (2014)		16.0622		1	1	1
54.39	-148.92	3640	16977.3	100	NaN	NaN	16190	120	NaN	NaN	13923	NaN	NaN	2244	156.25	2074	3	HS1 (15-17.5)	MD02-2489	Gebhardt et al. (2008); Rae et al. (2014)		16.0622		1	1	1
54.39	-148.92	3640	17288.5	100	NaN	NaN	17090	135	NaN	NaN	14164	NaN	NaN	2883	167.75	2074	3	HS1 (15-17.5)	MD02-2489	Gebhardt et al. (2008); Rae et al. (2014)		17.6529		1	1	1
54.39	-148.92	3640	17940	100	NaN	NaN	18120	120	NaN	NaN	14650	NaN	NaN	3480	144.5	2074	3		MD02-2489	Gebhardt et al. (2008); Rae et al. (2014)		29.0323		1	1	1
54.39	-148.92	3640	18663.3	100	NaN	NaN	18470	130	NaN	NaN	15289	NaN	NaN	3179	189.75	2074	3		MD02-2489	Gebhardt et al. (2008); Rae et al. (2014)		29.0323		1	1	1
-60	-69	1125	16720	390	NaN	NaN	15280	80	NaN	NaN	13800	NaN	NaN	1484	292.25	1232	8	HS1 (15-17.5)	47396B	Goldstein et al. (2001)		NaN		1	1	1
50.11	153.2	1175	5861	44	6260	40	7800	70	1540	81	5051.4	1208.6	40	2726	86.5	1855	3	HOL (<6)	V34-98	Gorbarenko et al. (2002)		23.7161		1	1	1
51.02	148.31	1305	13832	91	13040	70	14100	70	1060	99	12016	1024	70	2117	111.75	1983	3	BA (12.8-14.8)	936	Gorbarenko et al. (2004)		10.9167		1	1	1
51.02	148.31	1305	19532	172	17530	140	19070	110	1540	178	16182	1348	140	2874	185.75	1983	3	LGM (19-21.8)	936	Gorbarenko et al. (2004)		10.8028		1	1	1
51.02	148.31	1305	24431	210	21760	170	21180	100	-580	197	20352	1408	170	822	186.25	1983	3		936	Gorbarenko et al. (2004)	Negative B-P	9.82358		0	0	0
54.5	144.75	1305	3395	18	4205	15	5115	15	910	21	3186	1019	15	1929	33.5	1987	3	HOL (<6)	LV27-2-4	Gorbarenko et al. (2010)		50.0736		1	1	1
54.5	144.75	1305	5889	13	6230	15	6938	25	708	29	5067.8	1162.2	15	1862	41.5	1987	3	HOL (<6)	LV27-2-4	Gorbarenko et al. (2010)		42.452		1	1	1
54.5	144.75	1305	9035	20	9150	15	10125	20	975	25	8183	967	15	1970	47.5	1987	3	EHOL (7-11)	LV27-2-4	Gorbarenko et al. (2010)		36.5246		1	1	1
54.5	144.75	1305	11170	32	10760	35	11555	25	795	43	9680	1080	35	1861	58.75	1987	3		LV27-2-4	Gorbarenko et al. (2010)		38.0483		1	1	1
54.5	144.75	1305	14036	26	13150	25	14050	40	900	47	12098	1052	25	1947	70.75	1987	3	BA (12.8-14.8)	LV27-2-4	Gorbarenko et al. (2010)		41.6785		1	1	1
-44.07	-14.2	3770	29090	200	25407	85	26600	130	1193	155	24792	615	85	1750	265.25	1452	8	preLGM (25-30)	MD07-3076	Gottschalk et al. (2016)		7.54555	Cal age uncertainty guestimate	1	1	1
-44.07	-14.2	3770	32259	200	28540	89	29290	160	750	183	28393	147	89	945	225.5	1452	8		MD07-3076	Gottschalk et al. (2016)		8.23026	Cal age uncertainty guestimate	1	1	1
-44.07	-14.2	3770	32915	200	28827	91	29500	190	673	211	28500	327	91	964	257.5	1452	8		MD07-3076	Gottschalk et al. (2016)		8.37004	Cal age uncertainty guestimate	1	1	1
-44.07	-14.2	3770	34508	200	30195	411	32280	490	2085	640	30101	94	411	2170	580.25	1452	8		MD07-3076	Gottschalk et al. (2016)		8.7371	Cal age uncertainty guestimate	1	1	1
-44.07	-14.2	3770	35382	200	31235	316	32204	389	969	501	31047	188	316	1173	464.25	1452	8		MD07-3076	Gottschalk et al. (2016)		9.03002	Cal age uncertainty guestimate	1	1	1
-44.07	-14.2	3770	36341	200	31533	394	32582	452	1049	600	32081	-548	394	530	273	1452	8		MD07-3076	Gottschalk et al. (2016)	Negative direct R	9.28703	Cal age uncertainty guestimate	0	0	0
-44.07	-14.2	3770	36907	200	32447	438	33400	522	953	681	32549	-102	438	814	407	1452	8		MD07-3076	Gottschalk et al. (2016)	Negative direct R	9.36137	Cal age uncertainty guestimate	0	0	0
-44.07	-14.2	3770	37332	200	32159	463	33081	479	922	666	32945	-786	463	127	63.5	1452	8		MD07-3076	Gottschalk et al. (2016)	Negative direct R	9.41551	Cal age uncertainty guestimate	0	0	0
-44.07	-14.2	3770	38181	200	34174	758	34609	804	435	1105	33389	785	758	1203	602.25	1452	8		MD07-3076	Gottschalk et al. (2016)		9.52044	Cal age uncertainty guestimate	1	1	1
-44.07	-14.2	3770	38322	200	33429	421	34281	474	852	634	33436	-7	421	834	417.25	1452	8		MD07-3076	Gottschalk et al. (2016)	Negative direct R	9.5376	Cal age uncertainty guestimate	0	0	0
-44.07	-14.2	3770	38747	200	35747	926	36309	1010	562	1370	33581	2166	926	2714	1000.25	1452	8		MD07-3076	Gottschalk et al. (2016)		9.58784	Cal age uncertainty guestimate	1	1	1
-44.07	-14.2	3770	39713	200	35620	916	36499	1042	879	1387	34614	1006	916	1884	943	1452	8		MD07-3076	Gottschalk et al. (2016)		9.75751	Cal age uncertainty guestimate	1	1	1
-44.07	-14.2	3770	40137	200	36236	986	38165	1277	1929	1613	35024	1212	986	3162	1266	1452	8		MD07-3076	Gottschalk et al. (2016)		9.87867	Cal age uncertainty guestimate	1	1	1
-44.07	-14.2	3770	40654	200	35879	680	37364	830	1485	1073	35468	411	680	1897	851.25	1452	8		MD07-3076	Gottschalk et al. (2016)		10.0236	Cal age uncertainty guestimate	1	1	1
-47.7313	86.6952	150	8205	237	7836	70	NaN	NaN	NaN	NaN	7433	403	70	436	255	802	8	EHOL (7-11)	MD12-3396	Gottschalk et al. (2020)		23.2541		1	1	1
-47.7313	86.6952	150	11924	292	11116	90	NaN	NaN	NaN	NaN	10207	909	90	876	165.25	802	8	YD (11.8-12.7)	MD12-3396	Gottschalk et al. (2020)		21.9138		1	1	1
-47.7313	86.6952	150	12902	362	11711	98	NaN	NaN	NaN	NaN	11004	707	98	707	376.25	802	8		MD12-3396	Gottschalk et al. (2020)		21.051		1	1	1
-47.7313	86.6952	150	13423	325	12094	97	NaN	NaN	NaN	NaN	11537	557	97	520	337	802	8	BA (12.8-14.8)	MD12-3396	Gottschalk et al. (2020)		20.7703		1	1	1
-47.7313	86.6952	150	14689	282	13328	120	NaN	NaN	NaN	NaN	12460	868	120	868	177.5	802	8	BA (12.8-14.8)	MD12-3396	Gottschalk et al. (2020)		20.9068		1	1	1
-47.7313	86.6952	150	18352	307	16468	156	NaN	NaN	NaN	NaN	15224	1244	156	1378	338.75	802	8		MD12-3396	Gottschalk et al. (2020)		18.8753		1	1	1
-47.7313	86.6952	150	27653	850	25746	317	NaN	NaN	NaN	NaN	23358	2388	317	2158	896.25	802	8	preLGM (25-30)	MD12-3396	Gottschalk et al. (2020)		15.416		1	1	1
-47.7313	86.6952	150	34093	500	31549	1151	NaN	NaN	NaN	NaN	29443	2106	1151	1942	1262.25	802	8		MD12-3396	Gottschalk et al. (2020)		16.8334		1	1	1
-47.7313	86.6952	3614	947	165	1835	61	2581	62	746	87	1036	799	61	1532	183.5	1321	8	HOL (<6)	MD12-3396	Gottschalk et al. (2020)		14.7835		1	1	1
-47.7313	86.6952	3614	947	165	1835	61	2600	62	765	87	1036	799	61	1551	183.5	1321	8	HOL (<6)	MD12-3396	Gottschalk et al. (2020)		14.7835		1	1	1
-47.7313	86.6952	3614	1825	230	2495	63	3022	71	527	95	1902	593	63	1105	202.25	1321	8	HOL (<6)	MD12-3396	Gottschalk et al. (2020)		25.2055		1	1	1
-47.7313	86.6952	3614	2306	301	2839	62	3527	64	688	89	2233	606	62	1236	253.25	1321	8	HOL (<6)	MD12-3396	Gottschalk et al. (2020)		26.8864		1	1	1
-47.7313	86.6952	3614	2958	217	3434	66	4024	70	590	96	2846	588	66	1174	194.25	1321	8	HOL (<6)	MD12-3396	Gottschalk et al. (2020)		26.3692		1	1	1
-47.7313	86.6952	3614	4159	281	4394	69	4918	70	524	98	3820	574	69	1129	210	1321	8	HOL (<6)	MD12-3396	Gottschalk et al. (2020)		24.5251		1	1	1
-47.7313	86.6952	3614	5267	270	4985	70	6001	122	1016	141	4484	501	70	1425	251	1321	8	HOL (<6)	MD12-3396	Gottschalk et al. (2020)		23.9225		1	1	1
-47.7313	86.6952	3614	6028	271	5814	74	6649	83	835	111	5324.8	489.2	74	1379	266.25	1321	8	HOL (<6)	MD12-3396	Gottschalk et al. (2020)		23.5567		1	1	1
-47.7313	86.6952	3614	7275	331	6584	77	7349	86	765	115	6371	213	77	981	332.5	1321	8	EHOL (7-11)	MD12-3396	Gottschalk et al. (2020)		22.8179		1	1	1
-47.7313	86.6952	3614	7637	204	7423	82	7593	83	170	117	6794.6	628.4	82	790	248.5	1321	8	EHOL (7-11)	MD12-3396	Gottschalk et al. (2020)		22.391		1	1	1
-47.7313	86.6952	3614	7933	205	7487	80	8111	87	624	118	7082.2	404.8	80	996	233.25	1321	8	EHOL (7-11)	MD12-3396	Gottschalk et al. (2020)		22.9421		1	1	1
-47.7313	86.6952	3614	8270	255	7929	85	8447	98	518	130	7417	512	85	986	272.75	1321	8	EHOL (7-11)	MD12-3396	Gottschalk et al. (2020)		23.2164		1	1	1
-47.7313	86.6952	3614	8975	292	8472	91	9278	97	806	133	7970	502	91	1211	256.5	1321	8	EHOL (7-11)	MD12-3396	Gottschalk et al. (2020)		23.0641		1	1	1
-47.7313	86.6952	3614	9405	340	9085	90	9503	93	418	129	8327	758	90	1110	277	1321	8	EHOL (7-11)	MD12-3396	Gottschalk et al. (2020)		22.8602		1	1	1
-47.7313	86.6952	3614	10254	422	10124	109	10204	108	80	153	9162.8	961.2	109	1089	327.75	1321	8	EHOL (7-11)	MD12-3396	Gottschalk et al. (2020)		22.2352		1	1	1
-47.7313	86.6952	3614	11114	291	10567	102	11068	107	501	148	9657	910	102	1371	222.75	1321	8	EHOL (7-11)	MD12-3396	Gottschalk et al. (2020)		21.5944		1	1	1
-47.7313	86.6952	3614	11483	253	10921	107	11396	115	475	157	10018	903	107	1386	208.25	1321	8		MD12-3396	Gottschalk et al. (2020)		21.5971		1	1	1
-47.7313	86.6952	3614	11750	254	11256	111	11877	115	621	160	10121	1135	111	1740	176.75	1321	8	YD (11.8-12.7)	MD12-3396	Gottschalk et al. (2020)		21.7021		1	1	1
-47.7313	86.6952	3614	11780	257	11139	107	11838	139	699	175	10141	998	107	1682	193.25	1321	8	YD (11.8-12.7)	MD12-3396	Gottschalk et al. (2020)		21.7317		1	1	1
-47.7313	86.6952	3614	12084	330	11069	110	12160	119	1091	162	10337	732	110	1846	216.75	1321	8	YD (11.8-12.7)	MD12-3396	Gottschalk et al. (2020)		21.8471		1	1	1
-47.7313	86.6952	3614	13005	337	11838	115	12308	124	470	169	11062	776	115	1210	385.5	1321	8		MD12-3396	Gottschalk et al. (2020)		20.915		1	1	1
-47.7313	86.6952	3614	13706	294	12422	60	12748	130	326	143	11825	597	60	889	303.5	1321	8	BA (12.8-14.8)	MD12-3396	Gottschalk et al. (2020)		20.7209		1	1	1
-47.7313	86.6952	3614	14206	303	12833	123	13235	127	402	177	12306	527	123	960	229	1321	8	BA (12.8-14.8)	MD12-3396	Gottschalk et al. (2020)		20.6955		1	1	1
-47.7313	86.6952	3614	14299	281	12797	138	12957	148	160	202	12342	455	138	633	220.75	1321	8	BA (12.8-14.8)	MD12-3396	Gottschalk et al. (2020)		20.7007		1	1	1
-47.7313	86.6952	3614	14299	281	12797	138	13566	138	769	195	12342	455	138	1241	214	1321	8	BA (12.8-14.8)	MD12-3396	Gottschalk et al. (2020)		20.7007		1	1	1
-47.7313	86.6952	3614	14603	277	13109	137	14150	143	1041	198	12467	642	137	1716	187.25	1321	8	BA (12.8-14.8)	MD12-3396	Gottschalk et al. (2020)		20.8176		1	1	1
-47.7313	86.6952	3614	14603	277	13109	137	14225	143	1116	198	12467	642	137	1791	187.25	1321	8	BA (12.8-14.8)	MD12-3396	Gottschalk et al. (2020)		20.8176		1	1	1
-47.7313	86.6952	3614	14906	307	13412	132	15003	154	1591	203	12512	900	132	2448	229.25	1321	8		MD12-3396	Gottschalk et al. (2020)		20.9312		1	1	1
-47.7313	86.6952	3614	15805	488	14399	144	15525	163	1126	217	13182	1217	144	2338	367.75	1321	8	HS1 (15-17.5)	MD12-3396	Gottschalk et al. (2020)		20.2468		1	1	1
-47.7313	86.6952	3614	17652	458	15517	173	15938	181	421	250	14461	1056	173	1457	410.75	1321	8	HS1 (15-17.5)	MD12-3396	Gottschalk et al. (2020)		19.0347		1	1	1
-47.7313	86.6952	3614	18034	353	16267	176	17409	195	1142	263	14698	1569	176	2671	355.75	1321	8		MD12-3396	Gottschalk et al. (2020)		18.8533		1	1	1
-47.7313	86.6952	3614	18455	308	16106	205	17504	212	1398	295	15210	896	205	2333	378.25	1321	8		MD12-3396	Gottschalk et al. (2020)		18.8567		1	1	1
-47.7313	86.6952	3614	18642	330	17039	190	17613	210	574	283	15239	1800	190	2274	394.75	1321	8		MD12-3396	Gottschalk et al. (2020)		18.8821		1	1	1
-47.7313	86.6952	3614	19594	713	17833	200	18650	229	817	304	16300	1533	200	2366	663	1321	8	LGM (19-21.8)	MD12-3396	Gottschalk et al. (2020)		18.3219		1	1	1
-47.7313	86.6952	3614	19594	713	17833	200	18678	223	845	300	16300	1533	200	2393	661.25	1321	8	LGM (19-21.8)	MD12-3396	Gottschalk et al. (2020)		18.3219		1	1	1
-47.7313	86.6952	3614	21381	919	18879	235	19795	262	916	352	17649	1230	235	2081	803.5	1321	8	LGM (19-21.8)	MD12-3396	Gottschalk et al. (2020)		17.3986		1	1	1
-47.7313	86.6952	3614	22381	1041	19992	266	21023	310	1031	408	18454	1538	266	2443	926	1321	8	LGM (19-21.8)	MD12-3396	Gottschalk et al. (2020)		16.9787		1	1	1
-47.7313	86.6952	3614	25465	959	22688	356	23969	419	1281	550	21106	1582	356	2706	971.75	1321	8	preLGM (25-30)	MD12-3396	Gottschalk et al. (2020)		15.6686		1	1	1
-47.7313	86.6952	3614	25906	842	23494	390	24212	424	718	576	21623	1871	390	2488	904.5	1321	8	preLGM (25-30)	MD12-3396	Gottschalk et al. (2020)		15.5562		1	1	1
-47.7313	86.6952	3614	26003	887	22244	340	22679	378	435	508	21860	384	340	832	938.25	1321	8	preLGM (25-30)	MD12-3396	Gottschalk et al. (2020)	Flyer - v young	15.5367		0	0	0
58.9	-9.6	150	18485	200	16602.6	150	NaN	NaN	NaN	NaN	15167	1435.57	150	1412.57	259	456	1		MD04-2829	Hall et al., 2011		40	radcal, inctcal13, 14C age interpolated at pins	1	1	1
58.9	-9.6	150	19380.6	200	17196.9	150	NaN	NaN	NaN	NaN	16018	1178.91	150	1142.91	228.25	456	1	LGM (19-21.8)	MD04-2829	Hall et al., 2011		40	radcal, inctcal13, 14C age interpolated at pins	1	1	1
58.9	-9.6	150	20297.8	200	17920.5	150	NaN	NaN	NaN	NaN	16776	1144.5	150	1133.5	227	456	1	LGM (19-21.8)	MD04-2829	Hall et al., 2011		40	radcal, inctcal13, 14C age interpolated at pins	1	1	1
58.9	-9.6	150	20921.1	200	18619.5	150	NaN	NaN	NaN	NaN	17363	1256.5	150	1264.5	225.75	456	1	LGM (19-21.8)	MD04-2829	Hall et al., 2011		40	radcal, inctcal13, 14C age interpolated at pins	1	1	1
58.9	-9.6	150	22986.9	200	20384.6	150	NaN	NaN	NaN	NaN	19074	1310.62	150	1310.62	260.25	456	1		MD04-2829	Hall et al., 2011		40	radcal, inctcal13, 14C age interpolated at pins	1	1	1
58.9	-9.6	150	23400.5	200	20665.3	150	NaN	NaN	NaN	NaN	19497	1168.33	150	1220.33	214.75	456	1		MD04-2829	Hall et al., 2011		40	radcal, inctcal13, 14C age interpolated at pins	1	1	1
58.9	-9.6	150	25172.5	200	22292.2	150	NaN	NaN	NaN	NaN	20868	1424.25	150	1407.25	230.75	456	1	preLGM (25-30)	MD04-2829	Hall et al., 2011		40	radcal, inctcal13, 14C age interpolated at pins	1	1	1
58.9	-9.6	150	27921.5	200	24688	150	NaN	NaN	NaN	NaN	23920	768	150	805	284.25	456	1	preLGM (25-30)	MD04-2829	Hall et al., 2011		40	radcal, inctcal13, 14C age interpolated at pins	1	1	1
58.9	-9.6	150	28981.7	200	26045.3	150	NaN	NaN	NaN	NaN	24712	1333.35	150	1310.35	289	456	1	preLGM (25-30)	MD04-2829	Hall et al., 2011		40	radcal, inctcal13, 14C age interpolated at pins	1	1	1
-45	148	1689	16722	64	NaN	NaN	14940	45	NaN	NaN	13801	NaN	NaN	1142	65.25	1281	8	HS1 (15-17.5)	TN228-J2-382-1216-1010-01-1689-002	Hines et al. (2015)		NaN		1	1	1
-45	148	1689	17279	109	NaN	NaN	15390	45	NaN	NaN	14158	NaN	NaN	1200	115.5	1281	8	HS1 (15-17.5)	TN228-J2-382-1216-1010-01-1689-004	Hines et al. (2015)		NaN		1	1	1
-45	148	1689	17608	164	NaN	NaN	15730	50	NaN	NaN	14464	NaN	NaN	1273	128.5	1281	8	HS1 (15-17.5)	TN228-J2-382-1216-1010-01-1689-009	Hines et al. (2015)		NaN		1	1	1
-45	148	1689	33730	145	NaN	NaN	29300	230	NaN	NaN	29130	NaN	NaN	161	79.25	1281	8		TN228-J2-382-1216-1010-01-1689-010	Hines et al. (2015)		NaN		1	1	1
-45	148	1689	33730	145	NaN	NaN	30470	270	NaN	NaN	29130	NaN	NaN	1331	305.75	1281	8		TN228-J2-382-1216-1010-01-1689-010	Hines et al. (2015)		NaN		1	1	1
-45	148	1523	12615	86	NaN	NaN	11450	30	NaN	NaN	10551	NaN	NaN	887	110.25	1281	8	YD (11.8-12.7)	TN228-J2-382-1216-1350-03-1523-002	Hines et al. (2015)		NaN		1	1	1
-45	148	1523	21344	153	NaN	NaN	19030	80	NaN	NaN	17601	NaN	NaN	1388	132.5	1281	8	LGM (19-21.8)	TN228-J2-382-1216-1350-03-1523-005	Hines et al. (2015)		NaN		1	1	1
-45	148	1523	20367	109	NaN	NaN	18350	70	NaN	NaN	16830	NaN	NaN	1514	130.5	1281	8	LGM (19-21.8)	TN228-J2-382-1216-1350-03-1523-006	Hines et al. (2015)		NaN		1	1	1
-45	148	1523	18333	38	NaN	NaN	16130	60	NaN	NaN	15201	NaN	NaN	939	98.5	1281	8		TN228-J2-382-1216-1350-03-1523-007	Hines et al. (2015)		NaN		1	1	1
-45	148	1523	12682	33	NaN	NaN	11460	30	NaN	NaN	10627	NaN	NaN	829	72	1281	8	YD (11.8-12.7)	TN228-J2-382-1216-1350-03-1523-008	Hines et al. (2015)		NaN		1	1	1
-45	148	1523	25324	333	NaN	NaN	21620	100	NaN	NaN	21076	NaN	NaN	587	297	1281	8	preLGM (25-30)	TN228-J2-382-1216-1350-03-1523-010	Hines et al. (2015)		NaN		1	1	1
-45	148	1575	27579	92	NaN	NaN	23070	110	NaN	NaN	23293	NaN	NaN	252	-133.75	1281	8	preLGM (25-30)	TN228-J2-383-1217-0725-01-1575-001	Hines et al. (2015)	Negative radcal error, poor convergence	NaN		0	0	0
-45	148	1575	18102	65	NaN	NaN	15995	55	NaN	NaN	14722	NaN	NaN	1264	90	1281	8		TN228-J2-383-1217-0725-01-1575-006	Hines et al. (2015)		NaN		1	1	1
-45	148	1575	26980	96	NaN	NaN	23000	110	NaN	NaN	22545	NaN	NaN	458	160	1281	8	preLGM (25-30)	TN228-J2-383-1217-0725-01-1575-010	Hines et al. (2015)		NaN		1	1	1
-45	148	1575	26191	57	NaN	NaN	23020	110	NaN	NaN	21967	NaN	NaN	1046	128	1281	8	preLGM (25-30)	TN228-J2-383-1217-0725-01-1575-017	Hines et al. (2015)		NaN		1	1	1
-45	148	1575	19457	108	NaN	NaN	17610	60	NaN	NaN	16086	NaN	NaN	1513	130.5	1281	8	LGM (19-21.8)	TN228-J2-383-1217-0725-01-1575-023	Hines et al. (2015)		NaN		1	1	1
-45	148	1460	21408	57	NaN	NaN	19220	80	NaN	NaN	17698	NaN	NaN	1521	116.25	1281	8	LGM (19-21.8)	TN228-J2-383-1217-1320-05-1460-007	Hines et al. (2015)		NaN		1	1	1
-45	148	1460	19274	57	NaN	NaN	17180	60	NaN	NaN	15979	NaN	NaN	1203	73.5	1281	8	LGM (19-21.8)	TN228-J2-383-1217-1320-05-1460-008	Hines et al. (2015)		NaN		1	1	1
-45	148	1460	19483	61	NaN	NaN	17030	60	NaN	NaN	16115	NaN	NaN	909	104.5	1281	8	LGM (19-21.8)	TN228-J2-383-1217-1320-05-1460-009	Hines et al. (2015)		NaN		1	1	1
-45	148	1898	14210	43	NaN	NaN	13365	35	NaN	NaN	12308	NaN	NaN	1062	48.5	1332	8	BA (12.8-14.8)	TN228-J2-387-1225-1253-11-1898-001	Hines et al. (2015)		NaN		1	1	1
-45	148	1898	13891	72	NaN	NaN	12390	30	NaN	NaN	12065	NaN	NaN	362	73.25	1332	8	BA (12.8-14.8)	TN228-J2-387-1225-1253-11-1898-002	Hines et al. (2015)		NaN		1	1	1
-45	148	1748	14869	53	NaN	NaN	13675	40	NaN	NaN	12499	NaN	NaN	1182	70	1332	8		TN228-J2-387-1226-0615-17-1748-009	Hines et al. (2015)		NaN		1	1	1
-45	148	1748	15837	65	NaN	NaN	14610	40	NaN	NaN	13207	NaN	NaN	1405	70.5	1332	8	HS1 (15-17.5)	TN228-J2-387-1226-0615-17-1748-014	Hines et al. (2015)		NaN		1	1	1
-45	148	1748	16238	76	NaN	NaN	14685	40	NaN	NaN	13465	NaN	NaN	1216	76	1332	8	HS1 (15-17.5)	TN228-J2-387-1226-0615-17-1748-015	Hines et al. (2015)		NaN		1	1	1
-45	148	1748	16129	71	NaN	NaN	14765	40	NaN	NaN	13392	NaN	NaN	1369	68.5	1332	8	HS1 (15-17.5)	TN228-J2-387-1226-0615-17-1748-020	Hines et al. (2015)		NaN		1	1	1
-45	148	1680	14464	52	NaN	NaN	13275	40	NaN	NaN	12408	NaN	NaN	863	49.5	1281	8	BA (12.8-14.8)	TN228-J2-387-1226-1148-20-1680-003	Hines et al. (2015)		NaN		1	1	1
-45	148	1680	13354	90	NaN	NaN	12570	35	NaN	NaN	11510	NaN	NaN	1078	108.75	1281	8	BA (12.8-14.8)	TN228-J2-387-1226-1148-20-1680-005	Hines et al. (2015)		NaN		1	1	1
-45	148	1680	14161	82	NaN	NaN	13090	35	NaN	NaN	12270	NaN	NaN	819	91.25	1281	8	BA (12.8-14.8)	TN228-J2-387-1226-1148-20-1680-008	Hines et al. (2015)		NaN		1	1	1
-45	148	1680	14186	50	NaN	NaN	13040	35	NaN	NaN	12292	NaN	NaN	751	53	1281	8	BA (12.8-14.8)	TN228-J2-387-1226-1148-20-1680-008	Hines et al. (2015)		NaN		1	1	1
-45	148	1680	14198	50	NaN	NaN	13220	35	NaN	NaN	12301	NaN	NaN	924	52	1281	8	BA (12.8-14.8)	TN228-J2-387-1226-1148-20-1680-008	Hines et al. (2015)		NaN		1	1	1
-45	148	1680	14347	66	NaN	NaN	13425	35	NaN	NaN	12391	NaN	NaN	1046	55.5	1281	8	BA (12.8-14.8)	TN228-J2-387-1226-1148-20-1680-013	Hines et al. (2015)		NaN		1	1	1
-45	148	1680	14373	50	NaN	NaN	13475	35	NaN	NaN	12398	NaN	NaN	1084	49.5	1281	8	BA (12.8-14.8)	TN228-J2-387-1226-1148-20-1680-013	Hines et al. (2015)		NaN		1	1	1
-45	148	1680	14392	50	NaN	NaN	13430	35	NaN	NaN	12396	NaN	NaN	1034	46.75	1281	8	BA (12.8-14.8)	TN228-J2-387-1226-1148-20-1680-013	Hines et al. (2015)		NaN		1	1	1
-45	148	1680	14578	80	NaN	NaN	13345	40	NaN	NaN	12457	NaN	NaN	897	55.75	1281	8	BA (12.8-14.8)	TN228-J2-387-1226-1148-20-1680-017	Hines et al. (2015)		NaN		1	1	1
-45	148	1616	14831	35	NaN	NaN	13485	45	NaN	NaN	12465	NaN	NaN	1024	70	1281	8	BA (12.8-14.8)	TN228-J2-387-1226-1507-22-1616-004	Hines et al. (2015)		NaN		1	1	1
-45	148	1599	13852	139	NaN	NaN	12865	35	NaN	NaN	12016	NaN	NaN	863	132.75	1281	8	BA (12.8-14.8)	TN228-J2-387-1226-1635-23-1599-001	Hines et al. (2015)		NaN		1	1	1
-45	148	1599	13875	50	NaN	NaN	12865	35	NaN	NaN	12048	NaN	NaN	833	59.75	1281	8	BA (12.8-14.8)	TN228-J2-387-1226-1635-23-1599-001	Hines et al. (2015)		NaN		1	1	1
-45	148	1599	13892	50	NaN	NaN	12890	35	NaN	NaN	12065	NaN	NaN	855	54	1281	8	BA (12.8-14.8)	TN228-J2-387-1226-1635-23-1599-001	Hines et al. (2015)		NaN		1	1	1
-45	148	1599	13817	63	NaN	NaN	12775	35	NaN	NaN	12022	NaN	NaN	787	83.75	1281	8	BA (12.8-14.8)	TN228-J2-387-1226-1635-23-1599-002	Hines et al. (2015)		NaN		1	1	1
-45	148	1599	13836	50	NaN	NaN	12655	35	NaN	NaN	12013	NaN	NaN	644	75.75	1281	8	BA (12.8-14.8)	TN228-J2-387-1226-1635-23-1599-002	Hines et al. (2015)		NaN		1	1	1
-45	148	1599	13851	50	NaN	NaN	12565	35	NaN	NaN	12015	NaN	NaN	544	71	1281	8	BA (12.8-14.8)	TN228-J2-387-1226-1635-23-1599-002	Hines et al. (2015)		NaN		1	1	1
-45	148	1599	13620	79	NaN	NaN	12395	35	NaN	NaN	11845	NaN	NaN	605	88.25	1281	8	BA (12.8-14.8)	TN228-J2-387-1226-1635-23-1599-003	Hines et al. (2015)		NaN		1	1	1
-45	148	1599	13639	50	NaN	NaN	12410	30	NaN	NaN	11808	NaN	NaN	597	65	1281	8	BA (12.8-14.8)	TN228-J2-387-1226-1635-23-1599-003	Hines et al. (2015)		NaN		1	1	1
-45	148	1599	13653	50	NaN	NaN	12375	35	NaN	NaN	11819	NaN	NaN	556	64.25	1281	8	BA (12.8-14.8)	TN228-J2-387-1226-1635-23-1599-003	Hines et al. (2015)		NaN		1	1	1
-45	148	1599	13311	70	NaN	NaN	12385	30	NaN	NaN	11437	NaN	NaN	946	79.25	1281	8	BA (12.8-14.8)	TN228-J2-387-1226-1635-23-1599-004	Hines et al. (2015)		NaN		1	1	1
-45	148	1599	13323	50	NaN	NaN	12350	35	NaN	NaN	11469	NaN	NaN	892	69	1281	8	BA (12.8-14.8)	TN228-J2-387-1226-1635-23-1599-004	Hines et al. (2015)		NaN		1	1	1
-45	148	1599	13336	50	NaN	NaN	12355	35	NaN	NaN	11482	NaN	NaN	879	68.75	1281	8	BA (12.8-14.8)	TN228-J2-387-1226-1635-23-1599-004	Hines et al. (2015)		NaN		1	1	1
-45	148	1599	14898	132	NaN	NaN	13365	35	NaN	NaN	12509	NaN	NaN	849	101.5	1281	8		TN228-J2-387-1226-1635-23-1599-005	Hines et al. (2015)		NaN		1	1	1
-45	148	1599	14912	50	NaN	NaN	13225	35	NaN	NaN	12515	NaN	NaN	704	61.25	1281	8		TN228-J2-387-1226-1635-23-1599-005	Hines et al. (2015)		NaN		1	1	1
-45	148	1599	14928	50	NaN	NaN	13185	35	NaN	NaN	12524	NaN	NaN	654	61	1281	8		TN228-J2-387-1226-1635-23-1599-005	Hines et al. (2015)		NaN		1	1	1
-45	148	1599	13922	79	NaN	NaN	12845	35	NaN	NaN	12048	NaN	NaN	810	82	1281	8	BA (12.8-14.8)	TN228-J2-387-1226-1635-23-1599-020	Hines et al. (2015)		NaN		1	1	1
-45	148	1448	11951	67	NaN	NaN	11240	25	NaN	NaN	10281	NaN	NaN	975	55.5	1281	8	YD (11.8-12.7)	TN228-J2-387-1226-2330-25-1448-001	Hines et al. (2015)		NaN		1	1	1
-45	148	1428	8981	107	NaN	NaN	8685	20	NaN	NaN	7986	NaN	NaN	663	84.25	1184	8	EHOL (7-11)	TN228-J2-389-0101-0330-01-1428-010	Hines et al. (2015)		NaN		1	1	1
-45	148	1442	15056	67	NaN	NaN	13540	35	NaN	NaN	12629	NaN	NaN	908	71.5	1281	8	HS1 (15-17.5)	TN228-J2-393-0112-0730-13-1442-003	Hines et al. (2015)		NaN		1	1	1
-45	148	1442	12205	131	NaN	NaN	11010	25	NaN	NaN	10410	NaN	NaN	640	53.5	1281	8	YD (11.8-12.7)	TN228-J2-393-0112-0730-13-1442-008	Hines et al. (2015)		NaN		1	1	1
-45	148	1947	13199	39	NaN	NaN	12465	30	NaN	NaN	11356	NaN	NaN	1131	60	1332	8	BA (12.8-14.8)	TN228-J2-395-0113-1830-05-1947-003	Hines et al. (2015)		NaN		1	1	1
-45	148	1500	23338	75	NaN	NaN	19950	80	NaN	NaN	19410	NaN	NaN	523	115.25	1281	8		TN228-J2-395-0114-0057-09-1500-002	Hines et al. (2015)		NaN		1	1	1
-45	148	1500	25526	209	NaN	NaN	21810	100	NaN	NaN	21104	NaN	NaN	655	239.75	1281	8	preLGM (25-30)	TN228-J2-395-0114-0057-09-1500-008	Hines et al. (2015)		NaN		1	1	1
-45	148	1500	25198	144	NaN	NaN	22210	100	NaN	NaN	20903	NaN	NaN	1299	176	1281	8	preLGM (25-30)	TN228-J2-395-0114-0057-09-1500-010	Hines et al. (2015)		NaN		1	1	1
-45	148	1500	25231	50	NaN	NaN	22250	100	NaN	NaN	20950	NaN	NaN	1299	133.75	1281	8	preLGM (25-30)	TN228-J2-395-0114-0057-09-1500-010	Hines et al. (2015)		NaN		1	1	1
38.5	-55.5	1176	14350	291	NaN	NaN	12620	30	NaN	NaN	12393	NaN	NaN	251	155.25	665	1	BA (12.8-14.8)	ALV-see notes	Hines et al. 2019		NaN		1	1	1
38.5	-55.5	1222	11081	304	NaN	NaN	10280	30	NaN	NaN	9623.6	NaN	NaN	638	201.5	662	1	EHOL (7-11)	ALV-see notes	Hines et al. 2019		NaN		1	1	1
38.5	-55.5	1222	12310	581	NaN	NaN	11055	25	NaN	NaN	10365	NaN	NaN	662	30.25	662	1	BA (12.8-14.8)	ALV-see notes	Hines et al. 2019		NaN		1	1	1
38.5	-55.5	1222	13332	173	NaN	NaN	12210	30	NaN	NaN	11479	NaN	NaN	738	24.5	662	1	BA (12.8-14.8)	ALV-see notes	Hines et al. 2019		NaN		1	1	1
38.5	-55.5	1713	15674	379	NaN	NaN	14150	35	NaN	NaN	13077	NaN	NaN	1064	271	661	1	HS1 (15-17.5)	ALV-see notes	Hines et al. 2019		NaN		1	1	1
38.5	-55.5	1713	16000	251	NaN	NaN	14875	40	NaN	NaN	13309	NaN	NaN	1560	184	661	1	HS1 (15-17.5)	ALV-see notes	Hines et al. 2019		NaN		1	1	1
38.5	-55.5	1713	16342	144	NaN	NaN	14780	40	NaN	NaN	13556	NaN	NaN	1226	111.5	661	1	HS1 (15-17.5)	ALV-see notes	Hines et al. 2019		NaN		1	1	1
38.5	-55.5	1713	29959	249	NaN	NaN	27300	160	NaN	NaN	25573	NaN	NaN	1678	330.75	661	1	preLGM (25-30)	ALV-see notes	Hines et al. 2019		NaN		1	1	1
35.5	-50.5	1427	17375	136	NaN	NaN	15055	40	NaN	NaN	14289	NaN	NaN	757	120.5	661	1	HS1 (15-17.5)	RBDASS05-see Notes	Hines et al. 2019		NaN		1	1	1
35.5	-50.5	1494	17000	143	NaN	NaN	15400	40	NaN	NaN	13947	NaN	NaN	1439	121.5	657	1	HS1 (15-17.5)	RBDASS05-see Notes	Hines et al. 2019		NaN		1	1	1
35.5	-50.5	1494	17421	155	NaN	NaN	15290	40	NaN	NaN	14364	NaN	NaN	928	123.25	657	1	HS1 (15-17.5)	RBDASS05-see Notes	Hines et al. 2019		NaN		1	1	1
35.5	-50.5	1494	23520	107	NaN	NaN	19960	80	NaN	NaN	19552	NaN	NaN	454	116.75	657	1		RBDASS05-see Notes	Hines et al. 2019		NaN		1	1	1
35.5	-50.5	1494	24634	310	NaN	NaN	22130	90	NaN	NaN	20485	NaN	NaN	1645	251.5	657	1		RBDASS05-see Notes	Hines et al. 2019		NaN		1	1	1
35.5	-50.5	1494	25240	212	NaN	NaN	22490	90	NaN	NaN	20963	NaN	NaN	1530	198.25	657	1	preLGM (25-30)	RBDASS05-see Notes	Hines et al. 2019		NaN		1	1	1
35.5	-50.5	1494	25388	93	NaN	NaN	21740	80	NaN	NaN	21120	NaN	NaN	648	112.5	657	1	preLGM (25-30)	RBDASS05-see Notes	Hines et al. 2019		NaN		1	1	1
35.5	-50.5	1583	25484	122	NaN	NaN	21770	90	NaN	NaN	21102	NaN	NaN	647	129.25	657	1	preLGM (25-30)	RBDASS05-see Notes	Hines et al. 2019		NaN		1	1	1
35.5	-50.5	1583	26806	142	NaN	NaN	24310	120	NaN	NaN	22360	NaN	NaN	1882	166	657	1	preLGM (25-30)	RBDASS05-see Notes	Hines et al. 2019		NaN		1	1	1
35.5	-50.5	1610	16648	404	NaN	NaN	14755	40	NaN	NaN	13761	NaN	NaN	994	273.25	657	1	HS1 (15-17.5)	RBDASS05-see Notes	Hines et al. 2019		NaN		1	1	1
35.5	-50.5	1610	16743	225	NaN	NaN	15030	40	NaN	NaN	13809	NaN	NaN	1224	166.5	657	1	HS1 (15-17.5)	RBDASS05-see Notes	Hines et al. 2019		NaN		1	1	1
35.5	-50.5	1610	17216	285	NaN	NaN	15060	40	NaN	NaN	14151	NaN	NaN	898	202.25	657	1	HS1 (15-17.5)	RBDASS05-see Notes	Hines et al. 2019		NaN		1	1	1
35.5	-50.5	1610	17594	177	NaN	NaN	15315	40	NaN	NaN	14465	NaN	NaN	862	135.5	657	1	HS1 (15-17.5)	RBDASS05-see Notes	Hines et al. 2019		NaN		1	1	1
35.5	-50.5	1610	23193	91	NaN	NaN	20850	80	NaN	NaN	19321	NaN	NaN	1531	118.75	657	1		RBDASS05-see Notes	Hines et al. 2019		NaN		1	1	1
35.5	-50.5	1610	23193	276	NaN	NaN	20860	80	NaN	NaN	19321	NaN	NaN	1542	255	657	1		RBDASS05-see Notes	Hines et al. 2019		NaN		1	1	1
35.5	-50.5	1610	24974	54	NaN	NaN	21680	80	NaN	NaN	20680	NaN	NaN	998	101.5	657	1	preLGM (25-30)	RBDASS05-see Notes	Hines et al. 2019		NaN		1	1	1
35.5	-50.5	1610	25577	230	NaN	NaN	22030	90	NaN	NaN	21132	NaN	NaN	840	283	657	1	preLGM (25-30)	RBDASS05-see Notes	Hines et al. 2019		NaN		1	1	1
35.5	-50.5	1634	28271	190	NaN	NaN	23880	110	NaN	NaN	24093	NaN	NaN	-225	167.5	657	1	preLGM (25-30)	RBDASS05-see Notes	Hines et al. 2019	Negative B-Atm	NaN		0	0	0
35.5	-50.5	1634	28612	238	NaN	NaN	25350	130	NaN	NaN	24301	NaN	NaN	1008	250.25	657	1	preLGM (25-30)	RBDASS05-see Notes	Hines et al. 2019		NaN		1	1	1
35.5	-50.5	1634	30848	204	NaN	NaN	27220	160	NaN	NaN	26479	NaN	NaN	716	337.75	657	1		RBDASS05-see Notes	Hines et al. 2019		NaN		1	1	1
35.5	-50.5	1640	23286	208	NaN	NaN	19900	70	NaN	NaN	19378	NaN	NaN	519	12.5	657	1		RBDASS05-see Notes	Hines et al. 2019		NaN		1	1	1
35.5	-50.5	1640	23745	148	NaN	NaN	20840	80	NaN	NaN	19586	NaN	NaN	1205	206.25	657	1		RBDASS05-see Notes	Hines et al. 2019		NaN		1	1	1
35.5	-50.5	1640	24993	82	NaN	NaN	21790	80	NaN	NaN	20699	NaN	NaN	1090	113.75	657	1	preLGM (25-30)	RBDASS05-see Notes	Hines et al. 2019		NaN		1	1	1
35.5	-50.5	1640	25175	105	NaN	NaN	21660	90	NaN	NaN	20872	NaN	NaN	780	154	657	1	preLGM (25-30)	RBDASS05-see Notes	Hines et al. 2019		NaN		1	1	1
35.5	-50.5	1640	25197	169	NaN	NaN	22290	100	NaN	NaN	20902	NaN	NaN	1380	185.75	657	1	preLGM (25-30)	RBDASS05-see Notes	Hines et al. 2019		NaN		1	1	1
35.5	-50.5	1640	25342	124	NaN	NaN	21490	80	NaN	NaN	21095	NaN	NaN	430	138	657	1	preLGM (25-30)	RBDASS05-see Notes	Hines et al. 2019		NaN		1	1	1
35.5	-50.5	1640	25526	148	NaN	NaN	22340	90	NaN	NaN	21104	NaN	NaN	1194	158.5	657	1	preLGM (25-30)	RBDASS05-see Notes	Hines et al. 2019		NaN		1	1	1
35.5	-50.5	1640	27876	199	NaN	NaN	24660	120	NaN	NaN	23864	NaN	NaN	821	271.25	657	1	preLGM (25-30)	RBDASS05-see Notes	Hines et al. 2019		NaN		1	1	1
35.5	-50.5	1751	17081	228	NaN	NaN	15130	45	NaN	NaN	14082	NaN	NaN	1063	185.75	667	1	HS1 (15-17.5)	RBDASS05-see Notes	Hines et al. 2019		NaN		1	1	1
35.5	-50.5	1751	17357	318	NaN	NaN	15435	45	NaN	NaN	14257	NaN	NaN	1151	227	667	1	HS1 (15-17.5)	RBDASS05-see Notes	Hines et al. 2019		NaN		1	1	1
42.23	144.21	1212	10166	61	9840	40	10700	70	860	81	8932.8	907.2	40	1747	115.5	2080	3	EHOL (7-11)	GH02-1030	Ikehara et al. (2006)		20.6571		1	1	1
42.23	144.21	1212	10650	87	10240	60	10800	70	560	92	9404	836	60	1375	105.5	2080	3	EHOL (7-11)	GH02-1030	Ikehara et al. (2006)		20.6573		1	1	1
42.23	144.21	1212	11068.5	78	10510	60	11190	60	680	85	9584.9	925.1	60	1578	91.5	2080	3	EHOL (7-11)	GH02-1030	Ikehara et al. (2006)		21.2314		1	1	1
42.23	144.21	1212	11288	71	10690	60	11370	60	680	85	9935	755	60	1457	110.5	2080	3		GH02-1030	Ikehara et al. (2006)		21.6159		1	1	1
42.23	144.21	1212	11721	100	10950	60	11610	70	660	92	10090	860	60	1505	92.25	2080	3	YD (11.8-12.7)	GH02-1030	Ikehara et al. (2006)		22.2677		1	1	1
42.23	144.21	1212	13882	104	12900	70	13510	80	610	106	12057	843	70	1496	124.5	2080	3	BA (12.8-14.8)	GH02-1030	Ikehara et al. (2006)		20.8904		1	1	1
42.23	144.21	1212	14272	97	13270	70	13900	70	630	99	12327	943	70	1565	93.25	2080	3	BA (12.8-14.8)	GH02-1030	Ikehara et al. (2006)		21.5457		1	1	1
42.23	144.21	1212	14432	121	13060	70	14500	50	1440	86	12399	661	70	2096	72.75	2080	3	BA (12.8-14.8)	GH02-1030	Ikehara et al. (2006)		22.4155		1	1	1
42.23	144.21	1212	14913	65	13470	40	14160	40	690	57	12515	955	40	1638	74.5	2080	3		GH02-1030	Ikehara et al. (2006)		23.1677		1	1	1
42.23	144.21	1212	16867	243	15090	50	15560	80	470	94	13852	1238	50	1687	191.5	2080	3	HS1 (15-17.5)	GH02-1030	Ikehara et al. (2006)		23.9225		1	1	1
42.23	144.21	1212	16976	78	15010	80	16010	90	1000	120	13922	1088	80	2072	125.25	2080	3	HS1 (15-17.5)	GH02-1030	Ikehara et al. (2006)		25.6539		1	1	1
42.23	144.21	1212	17124	66	15140	60	16140	80	1000	100	14143	997	60	2023	109.25	2080	3	HS1 (15-17.5)	GH02-1030	Ikehara et al. (2006)		27.1841		1	1	1
42.23	144.21	1212	18517	87	16380	60	17230	100	850	117	15118	1262	60	2057	125.5	2080	3		GH02-1030	Ikehara et al. (2006)		28.2443		1	1	1
42.23	144.21	1212	20100	102	17780	70	18730	120	950	139	16624	1156	70	2099	143.5	2080	3	LGM (19-21.8)	GH02-1030	Ikehara et al. (2006)		27.7612		1	1	1
42.23	144.21	1212	21762	204	19130	180	20590	180	1460	255	17847	1283	180	2709	224.25	2080	3	LGM (19-21.8)	GH02-1030	Ikehara et al. (2006)		28.9495		1	1	1
34.2191	137.712	1076	2731	39	3180	40	6480	40	3300	57	2573	607	40	3908	87.5	1752	3	HOL (<6)	BO04-PC11	Ikehara et al. (2011)		13.9143		1	1	1
34.2191	137.712	1076	8690	62	8430	40	10810	40	2380	57	7906	524	40	2895	65	1752	3	EHOL (7-11)	BO04-PC11	Ikehara et al. (2011)		11.7376		1	1	1
34.2191	137.712	1076	13360	62	12120	60	15300	50	3180	78	11519	601	60	3803	85.75	1752	3	BA (12.8-14.8)	BO04-PC11	Ikehara et al. (2011)		12.8368		1	1	1
34.2191	137.712	1076	18482	78	16640	60	18360	80	1720	100	15172	1468	60	3182	104.25	1752	3		BO04-PC11	Ikehara et al. (2011)		13.0668		1	1	1
34.2191	137.712	1076	19071	97	17210	80	19900	90	2690	120	15807	1403	80	4083	128.75	1752	3	LGM (19-21.8)	BO04-PC11	Ikehara et al. (2011)		13.1876		1	1	1
27.47	-112.1	818	2729	31	3420	35	4080	30	660	46	2572	848	35	1515	76.5	1472	3	HOL (<6)	AII125-8 GGC55	Keigwin (2002)	methane diagenesis noted	21.9861		0	0	0
27.47	-112.1	818	4343	50	4710	40	5220	25	510	47	3875	835	40	1328	48.5	1472	3	HOL (<6)	AII125-8 GGC55	Keigwin (2002)	methane diagenesis noted	48.3537		0	0	0
27.47	-112.1	818	5463	54	5610	45	6130	35	520	57	4701.2	908.8	45	1413	64.25	1472	3	HOL (<6)	AII125-8 GGC55	Keigwin (2002)	methane diagenesis noted	58.5759		0	0	0
27.47	-112.1	818	5483	63	5630	60	6170	35	540	69	4775.4	854.6	60	1431	76.25	1472	3	HOL (<6)	AII125-8 JPC56	Keigwin (2002)	methane diagenesis noted	18.2382		0	0	0
27.47	-112.1	818	9540	79	9355	70	9280	35	-75	78	8585	770	70	687	116.75	1472	3	EHOL (7-11)	AII125-8 JPC56	Keigwin (2002)	methane diagenesis noted	44.0252	Negative B-P	0	0	0
27.47	-112.1	818	10035	101	9705	75	9520	45	-185	87	8884	821	75	631	78	1472	3	EHOL (7-11)	AII125-8 JPC56	Keigwin (2002)	methane diagenesis noted	46.8361	Negative B-P	0	0	0
27.47	-112.1	818	10579	126	10125	80	10550	60	425	100	9375.4	749.6	80	1183	117.75	1472	3	EHOL (7-11)	AII125-8 JPC56	Keigwin (2002)	methane diagenesis noted	61.4425		0	0	0
27.47	-112.1	818	11753	120	10945	75	11350	45	405	87	10127	818	75	1227	85.75	1472	3	YD (11.8-12.7)	AII125-8 JPC56	Keigwin (2002)	methane diagenesis noted	76.5762		0	0	0
27.47	-112.1	818	12539	92	11490	90	12050	45	560	101	10516	974	90	1546	99.75	1472	3	YD (11.8-12.7)	AII125-8 JPC56	Keigwin (2002)	methane diagenesis noted	79.7512		0	0	0
27.47	-112.1	818	13393	85	12395	80	12950	60	555	100	11511	884	80	1425	117	1472	3	BA (12.8-14.8)	AII125-8 JPC56	Keigwin (2002)	methane diagenesis noted	82.1325		0	0	0
27.47	-112.1	818	14864	146	13400	90	13950	55	550	105	12496	904	90	1450	109.5	1472	3		AII125-8 JPC56	Keigwin (2002)	methane diagenesis noted	94.1873		0	0	0
27.47	-112.1	818	15245	128	13685	100	14150	55	465	114	12779	906	100	1365	114.5	1472	3	HS1 (15-17.5)	AII125-8 JPC56	Keigwin (2002)	methane diagenesis noted	104.952		0	0	0
27.47	-112.1	818	16408	131	14580	100	14700	65	120	119	13607	973	100	1101	116	1472	3	HS1 (15-17.5)	AII125-8 JPC56	Keigwin (2002)	methane diagenesis noted	103.608		0	0	0
27.47	-112.1	818	16786	121	14870	100	15550	60	680	117	13823	1047	100	1726	97	1472	3	HS1 (15-17.5)	AII125-8 JPC56	Keigwin (2002)	methane diagenesis noted	110.211		0	0	0
49.142	150.337	1227	19457	101	17200	80	18650	110	1450	136	16086	1114	80	2547	157	1974	3	LGM (19-21.8)	B34-91	Keigwin (2002)		11.564		1	1	1
48.608	150.428	1980	19733	99	17650	80	19200	110	1550	136	16353	1297	80	2832	132.75	2087	3	LGM (19-21.8)	Nesmeyanov25-1 GGC15	Keigwin (2002)		8.61501		1	1	1
48.752	150.431	1700	18163	144	16250	120	17800	140	1550	184	14766	1484	120	2971	233.5	2087	3		Nesmeyanov25-1 GGC18	Keigwin (2002)		11.8923		1	1	1
48.874	150.432	1510	19367	119	17350	100	18700	140	1350	172	16010	1340	100	2667	172.75	2030	3	LGM (19-21.8)	Nesmeyanov25-1 GGC20	Keigwin (2002)		11.8759		1	1	1
49.601	150.18	995	18695	223	16750	200	18200	95	1450	221	15348	1402	200	2842	248.75	1771	3		Nesmeyanov25-1 GGC27	Keigwin (2002)		3.74432		1	1	1
29.7	-73.4	3845	19185	118	16650	100	17650	140	1000	172	15930	720	100	1738	167.25	800	1	LGM (19-21.8)	KNR140 GGC26	Keigwin (2004)		17.0967		1	1	1
32.02	-76.07	2590	21250	140	18350	95	18950	120	600	153	17575	775	95	1363	154	734	1	LGM (19-21.8)	KNR140 GGC43	Keigwin (2004)		8.4		1	1	1
32.75	-76.23	1903	12578	45	11200	50	11400	65	200	82	10472	728	50	882	80.75	703	1	YD (11.8-12.7)	KNR140 GGC50	Keigwin (2004)		14.8275		1	1	1
32.78	-76.28	1790	12694	51	11350	65	11650	100	300	119	10650	700	65	983	146	703	1	YD (11.8-12.7)	KNR140 GGC51	Keigwin (2004)		24.421		1	1	1
32.5	-76.3	2155	12923	57	11600	50	11750	60	150	78	11032	568	50	732	74	714	1	BA (12.8-14.8)	KNR140 GGC66	Keigwin (2004)		6.88695		1	1	1
32.38	-76.38	2243	12869	71	11550	70	11600	80	50	106	10965	585	70	626	109.5	714	1	BA (12.8-14.8)	KNR140 JPC01	Keigwin (2004)		7.38208		1	1	1
29.07	-72.9	4250	12290	87	10950	55	12550	170	1600	179	10417	533	55	2164	169.75	849	1	YD (11.8-12.7)	KNR140 JPC12	Keigwin (2004)		6.42799		1	1	1
29.07	-72.9	4250	18208	84	15750	75	17300	95	1550	121	14854	896	75	2422	183.5	849	1		KNR140 JPC12	Keigwin (2004)		12.6043		1	1	1
28.25	-74.4	4712	18161	106	15700	95	17150	140	1450	169	14763	937	95	2336	215.75	917	1		KNR140 JPC22	Keigwin (2004)		9.25059		1	1	1
32.23	-76.28	2394	12365	193	11050	160	12300	70	1250	175	10366	684	160	1891	132.5	734	1	YD (11.8-12.7)	KNR140 PG02	Keigwin (2004)		5.86332		1	1	1
33.69	-57.575	4600	17079	69	14800	60	15970	120	1170	134	14078	722	60	1904	148.25	934	1	HS1 (15-17.5)	HU89038-8PC	Keigwin and Boyle (2008)		21.3713		1	1	1
33.69	-57.575	4600	19247	110	16700	90	18200	160	1500	184	15971	729	90	2244	177.25	934	1	LGM (19-21.8)	HU89038-8PC	Keigwin and Boyle (2008)		29.8748		1	1	1
33.69	-57.575	4600	17025	75	14750	65	15800	90	1050	111	13981	769	65	1806	129.5	934	1	HS1 (15-17.5)	OCE326 GGC5	Keigwin and Boyle (2008)		12.9809		1	1	1
27.9	-111.65	655	19617	159	17000	130	17650	120	650	177	16340	660	130	1365	185	1309	3	LGM (19-21.8)	DSDP480	Keigwin and Lehman (2015)		5.55641		1	1	1
-0.374	-106.179	3606	3290	22	3555	15	5605	25	2050	29	3074	481	15	2533	34	2003	4	HOL (<6)	KNR73 3PC	Keigwin and Lehman (2015)		6.68693		1	1	1
-0.374	-106.179	3606	6909	30	6620	25	8070	30	1450	39	6062.8	557.2	25	2015	42.75	2003	4		KNR73 3PC	Keigwin and Lehman (2015)		4.4869		1	1	1
-0.374	-106.179	3606	17001	96	14727.5	80	17580	110	2852.5	136	13948	779.5	80	3610	149.75	2003	4	HS1 (15-17.5)	KNR73 3PC	Keigwin and Lehman (2015)		3.8233		1	1	1
-0.374	-106.179	3606	25752	186	22380	190	24630	230	2250	298	21373	1007	190	3235	343.5	2003	4	preLGM (25-30)	KNR73 3PC	Keigwin and Lehman (2015)		3.14539		1	1	1
-0.374	-106.179	3606	28878	269	25520	250	28240	420	2720	489	24660	860	250	3597	507.75	2003	4	preLGM (25-30)	KNR73 3PC	Keigwin and Lehman (2015)		3.08193		1	1	1
1.848	-110.268	3681	5323	21	5170	15	6235	40	1065	43	4648.8	521.2	15	1592	71	2017	3	HOL (<6)	KNR73 4PC	Keigwin and Lehman (2015)		3.28762		1	1	1
1.848	-110.268	3681	6753	32	6487.5	25	8450	50	1962.5	56	5954.2	533.3	25	2516	63	2017	3		KNR73 4PC	Keigwin and Lehman (2015)		4.07226		1	1	1
1.848	-110.268	3681	13332	49	12010	45	16920	130	4910	138	11479	531	45	5455	142	2017	3	BA (12.8-14.8)	KNR73 4PC	Keigwin and Lehman (2015)	Apparent flyer, extremely high age	3.26283		0	0	0
1.848	-110.268	3681	18019	77	15550	75	20100	71.0634	4550	103	14692	858	75	5410.37	92.75	2017	3		KNR73 4PC	Keigwin and Lehman (2015)		2.96909		1	1	1
1.848	-110.268	3681	24029	150	20830	140	25100	140	4270	198	20031	799	140	5068	221.75	2017	3		KNR73 4PC	Keigwin and Lehman (2015)		2.87153		1	1	1
1.848	-110.268	3681	26781	142	23365	120	27040	360	3675	379	22356	1009	120	4618	370.5	2017	3	preLGM (25-30)	KNR73 4PC	Keigwin and Lehman (2015)		2.87517		1	1	1
4.002	-114.187	3806	19189	85	16650	65	18100	110	1450	128	15934	716	65	2180	130.5	2034	3	LGM (19-21.8)	KNR73 6PG	Keigwin and Lehman (2015)	Low sed rate <2cm/kyr *	1.90213		0	1	0
0.022	-86.463	2941	17721	98	15300	70	16950	80	1650	106	14465	835	70	2462	103.25	2030	4		ME0005-24JC	Keigwin and Lehman (2015)		16.3648		1	1	1
0.022	-86.463	2941	21327	144	18400	95	20400	170	2000	195	17588	812	95	2763	198.25	2030	4	LGM (19-21.8)	ME0005-24JC	Keigwin and Lehman (2015)		16.5049		1	1	1
-3.338	-102.453	3253	16272	91	14150	70	17100	81.3941	2950	107	13492	658	70	3603.06	109.75	1992	4	HS1 (15-17.5)	PLDS 7G	Keigwin and Lehman (2015)		2.27384		1	1	1
-3.338	-102.453	3253	18932	129	16425	120	19400	106.066	2975	160	15696	729	120	3718.34	187.25	1992	4	LGM (19-21.8)	PLDS 7G	Keigwin and Lehman (2015)		2.21847		1	1	1
-3.338	-102.453	3253	20436	141	17675	120	20500	113.137	2825	165	16889	786	120	3590.63	175.25	1992	4	LGM (19-21.8)	PLDS 7G	Keigwin and Lehman (2015)		2.3488		1	1	1
51.073	168.975	3225	13963	66	13100	50	14250	55	1150	74	12001	1099	50	2204	84	2058	3	BA (12.8-14.8)	RNDB PC11	Keigwin and Lehman (2015)		4.65516		1	1	1
49.725	168.312	2329	10714	64	10450	40	12000	50	1550	64	9481	969	40	2521	79.75	2033	3	EHOL (7-11)	RNDB PC13	Keigwin and Lehman (2015)	Low sed rate <2cm/kyr *	1.21337		0	1	0
49.725	168.312	2329	13846	89	13000	70	15650	95	2650	118	12012	988	70	3659	127.75	2033	3	BA (12.8-14.8)	RNDB PC13	Keigwin and Lehman (2015)		5.09172		1	1	1
49.725	168.312	2329	13902	61	13050	50	14900	75	1850	90	12066	984	50	2868	88.25	2033	3	BA (12.8-14.8)	RNDB PC13	Keigwin and Lehman (2015)		5.17911		1	1	1
-1.608	162.558	4250	13329	203	12000	190	18750	90	6750	210	11476	524	190	7286	240	1870	3	BA (12.8-14.8)	S67 FFC15	Keigwin and Lehman (2015)	Apparent flyer, extremely high age, Low sed rate <2cm/kyr	1.27541		0	0	0
-1.608	162.558	4250	25185	228	21800	210	25600	170	3800	270	20885	915	210	4702	256	1870	3	preLGM (25-30)	S67 FFC15	Keigwin and Lehman (2015)	Low sed rate <2cm/kyr *	0.992654		0	1	0
-4.507	-102.015	3410	16303	70	14175	55	18400	100	4225	114	13519	656	55	4878	117.5	1992	4	HS1 (15-17.5)	VNTR01-10GGC	Keigwin and Lehman (2015)		2.08551		1	1	1
-4.507	-102.015	3410	25617	88	22200	90	25000	91.9239	2800	129	21174	1026	90	3805.76	138.5	1992	4	preLGM (25-30)	VNTR01-10GGC	Keigwin and Lehman (2015)	Low sed rate <2cm/kyr *	1.79568		0	1	0
31.6667	-75.4167	2975	1364	39	1980	35	2125	35	145	49	1493	487	35	634	69.5	759	1	HOL (<6)	KNR140 GGC39	Keigwin and Schlegel (2002)		5.13196		1	1	1
31.6667	-75.4167	2975	6907	49	6620	40	7050	45	430	60	6062.4	557.6	40	996	62.75	759	1		KNR140 GGC39	Keigwin and Schlegel (2002)		9.12118		1	1	1
31.6667	-75.4167	2975	12696	35	11350	50	12300	65	950	82	10652	698	50	1641	104	759	1	YD (11.8-12.7)	KNR140 GGC39	Keigwin and Schlegel (2002)		10.0032		1	1	1
31.6667	-75.4167	2975	19487	94	16900	75	18150	100	1250	125	16120	780	75	2015	151	759	1	LGM (19-21.8)	KNR140 GGC39	Keigwin and Schlegel (2002)		22.0147		1	1	1
31.6902	-75.43	2972	18209	94	15750	80	16550	95	800	124	14856	894	80	1668	188.25	759	1		KNR140 JPC37	Keigwin and Schlegel (2002)		17.2991		1	1	1
31.6902	-75.43	2972	21121	120	18250	95	19300	120	1050	153	17536	714	95	1775	146	759	1	LGM (19-21.8)	KNR140 JPC37	Keigwin and Schlegel (2002)		19.2699		1	1	1
31.6902	-75.43	2972	24537	155	21250	120	22400	150	1150	192	20386	864	120	1982	185.25	759	1		KNR140 JPC37	Keigwin and Schlegel (2002)		21.3147		1	1	1
31.6902	-75.43	2972	27272.5	215	23900	250	24900	180	1000	308	22986	914	250	1906	335.75	759	1	preLGM (25-30)	KNR140 JPC37	Keigwin and Schlegel (2002)		22.5502		1	1	1
29.07	-72.9	4250	17252	94	14950	80	16500	55	1550	97	14148	802	80	2327	107	849	1	HS1 (15-17.5)	KNR140 JPC12	Keigwin and Swift (2017)		11.303		1	1	1
29.07	-72.9	4250	18964.5	142	16450	130	17900	110	1450	170	15731	719	130	2183	195.5	849	1	LGM (19-21.8)	KNR140 JPC12	Keigwin and Swift (2017)		13.6571		1	1	1
36.1202	-72.292	3927	19431	69	16850	60	18500	75	1650	96	16059	791	60	2431	106.5	810	1	LGM (19-21.8)	KNR178 GGC2	Keigwin and Swift (2017)		8.44012		1	1	1
36.1202	-72.292	3927	20239	81	17500	70	18750	75	1250	103	16727	773	70	2019	103.75	810	1	LGM (19-21.8)	KNR178 GGC2	Keigwin and Swift (2017)		9.289		1	1	1
36.1202	-72.292	3927	20352	65	17600	60	18650	75	1050	96	16819	781	60	1829	100	810	1	LGM (19-21.8)	KNR178 GGC2	Keigwin and Swift (2017)		10.4167		1	1	1
36.1202	-72.292	3927	21256	95	18350	70	19550	70	1200	99	17576	774	70	1969	97	810	1	LGM (19-21.8)	KNR178 GGC2	Keigwin and Swift (2017)		10.7264		1	1	1
43.4645	-54.7557	3870	17717	125	15300	95	17050	70	1750	118	14464	836	95	2559	104.5	739	1		KNR197-10 CDH42	Keigwin and Swift (2017)		32.7651		1	1	1
43.4645	-54.7557	3870	18319	90	15850	75	17300	65	1450	99	15178	672	75	2154	159	739	1		KNR197-10 CDH42	Keigwin and Swift (2017)		36.4922		1	1	1
43.4645	-54.7557	3870	19551	127	16950	100	18050	65	1100	119	16215	735	100	1829	140.75	739	1	LGM (19-21.8)	KNR197-10 CDH42	Keigwin and Swift (2017)		42.0183		1	1	1
43.4645	-54.7557	3870	19934	81	17250	65	18550	90	1300	111	16529	721	65	2037	120.75	739	1	LGM (19-21.8)	KNR197-10 CDH42	Keigwin and Swift (2017)		41.7628		1	1	1
43.4645	-54.7557	3870	21407	217	18450	160	19800	85	1350	181	17696	754	160	2107	154	739	1	LGM (19-21.8)	KNR197-10 CDH42	Keigwin and Swift (2017)		42.0657		1	1	1
36.405	-48.5398	5011	14915	85	13100	60	14400	75	1300	96	12516	584	60	1875	105.25	886	1	HS1 (15-17.5)	KNR197-10 GGC17	Keigwin and Swift (2017)		9.98994		1	1	1
36.405	-48.5398	5011	20460	43	17700	40	18900	120	1200	126	16917	783	40	1976	135.5	886	1	LGM (19-21.8)	KNR197-10 GGC17	Keigwin and Swift (2017)		8.89541		1	1	1
33.6867	-57.615	4583	12421.5	375	11150	310	11800	190	650	364	10344	806	310	1319	348.75	934	1	YD (11.8-12.7)	KNR31 GPC5	Keigwin et al. (1991)		16.1011		1	1	1
43.07	-55.83	3525	13844	90	12450	70	12950	55	500	89	12011	439	70	953	101	739	1	BA (12.8-14.8)	OCE326 GGC14	Keigwin et al. (2005); Robinson et al. (2005)		17.0471		1	1	1
43.07	-55.83	3525	14106	89	12650	60	12800	55	150	81	12236	414	60	581	110	739	1	BA (12.8-14.8)	OCE326 GGC14	Keigwin et al. (2005); Robinson et al. (2005)		20.2042		1	1	1
43.07	-55.83	3525	14257	98	12750	55	13400	70	650	89	12324	426	55	1074	96	739	1	BA (12.8-14.8)	OCE326 GGC14	Keigwin et al. (2005); Robinson et al. (2005)		17.9561		1	1	1
43.07	-55.83	3525	15557	101	13600	75	14900	70	1300	103	12975	625	75	1914	104.75	739	1	HS1 (15-17.5)	OCE326 GGC14	Keigwin et al. (2005); Robinson et al. (2005)		23.2693		1	1	1
34.28	-120.03	576.5	1007	60	1850	60	2430	50	580	78	1135	715	60	1314	83.75	1430	3	HOL (<6)	ODP893A	Kennett and Ingram (1995)		153.923		1	1	1
34.28	-120.03	576.5	1721	86	2520	70	3000	60	480	92	1834	686	70	1177	97	1430	3	HOL (<6)	ODP893A	Kennett and Ingram (1995)		210.924		1	1	1
34.28	-120.03	576.5	2988	89	3555	70	4130	80	575	106	2865	690	70	1259	103	1430	3	HOL (<6)	ODP893A	Kennett and Ingram (1995)		189.759		1	1	1
34.28	-120.03	576.5	4577	73	4800	50	5210	50	410	71	4104	696	50	1113	74.25	1430	3	HOL (<6)	ODP893A	Kennett and Ingram (1995)		153.813		1	1	1
34.28	-120.03	576.5	6197	77	6200	70	6570	150	370	166	5377.2	822.8	70	1189	168.75	1430	3		ODP893A	Kennett and Ingram (1995)		140.552		1	1	1
34.28	-120.03	576.5	8294	99	8235	90	8570	70	335	114	7436	799	90	1102	132.5	1430	3	EHOL (7-11)	ODP893A	Kennett and Ingram (1995)		141.91		1	1	1
34.28	-120.03	576.5	9362	184	9100	150	9230	150	130	212	8316	784	150	876	233	1430	3	EHOL (7-11)	ODP893A	Kennett and Ingram (1995)		148.579		1	1	1
34.28	-120.03	576.5	10647	130	10080	80	10860	110	780	136	9395	685	80	1436	151	1430	3	EHOL (7-11)	ODP893A	Kennett and Ingram (1995)		173.1		1	1	1
34.28	-120.03	576.5	10855	126	10210	90	10670	110	460	142	9573	637	90	1107	129.25	1430	3	EHOL (7-11)	ODP893A	Kennett and Ingram (1995)		173.468		1	1	1
34.28	-120.03	576.5	10925	101	10260	70	10630	70	370	99	9616	644	70	1044	83.25	1430	3	EHOL (7-11)	ODP893A	Kennett and Ingram (1995)		175.286		1	1	1
34.28	-120.03	576.5	12913	230	11810	240	12020	100	210	260	11020	790	240	1015	287.75	1430	3		ODP893A	Kennett and Ingram (1995)		176.256		1	1	1
34.28	-120.03	576.5	13430	74	12340	70	12760	80	420	106	11541	799	70	1199	120	1430	3	BA (12.8-14.8)	ODP893A	Kennett and Ingram (1995)		180.045		1	1	1
34.28	-120.03	576.5	14331	265	12990	170	13520	90	530	192	12378	612	170	1170	173.5	1430	3	BA (12.8-14.8)	ODP893A	Kennett and Ingram (1995)		183.937		1	1	1
34.28	-120.03	576.5	16412	170	14490	130	14980	160	490	206	13609	881	130	1381	196.75	1430	3	HS1 (15-17.5)	ODP893A	Kennett and Ingram (1995)		169.388		1	1	1
34.28	-120.03	576.5	17099	291	15040	230	15370	450	330	505	14114	926	230	1297	494.75	1430	3	HS1 (15-17.5)	ODP893A	Kennett and Ingram (1995)		171.823		1	1	1
34.28	-120.03	576.5	17725	172	15550	140	16080	220	530	261	14467	1083	140	1572	240.75	1430	3		ODP893A	Kennett and Ingram (1995)		176.869		1	1	1
34.28	-120.03	576.5	18917	212	16630	190	17120	90	490	210	15677	953	190	1451	246.75	1430	3	LGM (19-21.8)	ODP893A	Kennett and Ingram (1995)		174.393		1	1	1
34.28	-120.03	576.5	19607	176	17220	140	17510	100	290	172	16324	896	140	1232	180.75	1430	3	LGM (19-21.8)	ODP893A	Kennett and Ingram (1995)		173.713		1	1	1
34.28	-120.03	576.5	28647	270	25530	260	26080	320	550	412	24346	1184	260	1680	408.5	1430	3	preLGM (25-30)	ODP893A	Kennett and Ingram (1995)		159.912	Delta-R value taken from Hendy et al. (2002)	1	1	1
58.97	-9.61	150	3672	200	3740	55	NaN	NaN	NaN	NaN	3395	345	55	311	169.75	456	1	HOL (<6)	DAPC2	Knutz et al., 2007		5.74919	radcal, inctcal13, cal age interpolated at 14C dates	1	1	1
58.97	-9.61	150	9238	200	8590	90	NaN	NaN	NaN	NaN	8224.8	365.2	90	331	148	456	1	EHOL (7-11)	DAPC2	Knutz et al., 2007		13.8719	radcal, inctcal13, cal age interpolated at 14C dates	1	1	1
58.97	-9.61	150	11833.2	200	10830	90	NaN	NaN	NaN	NaN	10199	631	90	648	139.75	456	1	YD (11.8-12.7)	DAPC2	Knutz et al., 2007		19.402	radcal, inctcal13, cal age interpolated at 14C dates	1	1	1
58.97	-9.61	150	12760.9	200	11380	110	NaN	NaN	NaN	NaN	10876	504	110	550	249.25	456	1		DAPC2	Knutz et al., 2007		16.041	radcal, inctcal13, cal age interpolated at 14C dates	1	1	1
58.97	-9.61	150	15379.2	200	13410	130	NaN	NaN	NaN	NaN	12896	514	130	532	193	456	1	HS1 (15-17.5)	DAPC2	Knutz et al., 2007		25.569	radcal, inctcal13, cal age interpolated at 14C dates	1	1	1
58.97	-9.61	150	16005	200	14400	110	NaN	NaN	NaN	NaN	13313	1087	110	1084	178.75	456	1	HS1 (15-17.5)	DAPC2	Knutz et al., 2007		41.917	radcal, inctcal13, cal age interpolated at 14C dates	1	1	1
58.97	-9.61	150	16148.1	200	14900	110	NaN	NaN	NaN	NaN	13403	1497	110	1487	177.5	456	1	HS1 (15-17.5)	DAPC2	Knutz et al., 2007		41.9357	radcal, inctcal13, cal age interpolated at 14C dates	1	1	1
58.97	-9.61	150	16410.4	200	15330	100	NaN	NaN	NaN	NaN	13608	1722	100	1730	167.25	456	1	HS1 (15-17.5)	DAPC2	Knutz et al., 2007		46.0117	radcal, inctcal13, cal age interpolated at 14C dates	1	1	1
58.97	-9.61	150	16562.5	200	15390	130	NaN	NaN	NaN	NaN	13696	1694	130	1692	182	456	1	HS1 (15-17.5)	DAPC2	Knutz et al., 2007		48.4441	radcal, inctcal13, cal age interpolated at 14C dates	1	1	1
58.97	-9.61	150	16996	200	15400	170	NaN	NaN	NaN	NaN	13943	1457	170	1421	230.25	456	1	HS1 (15-17.5)	DAPC2	Knutz et al., 2007		62.8373	radcal, inctcal13, cal age interpolated at 14C dates	1	1	1
58.97	-9.61	150	17155.2	200	15560	140	NaN	NaN	NaN	NaN	14158	1402	140	1446	219.25	456	1	HS1 (15-17.5)	DAPC2	Knutz et al., 2007		67.981	radcal, inctcal13, cal age interpolated at 14C dates	1	1	1
58.97	-9.61	150	18037.8	200	16430	130	NaN	NaN	NaN	NaN	14699	1731	130	1719	245.5	456	1		DAPC2	Knutz et al., 2007		55.5185	radcal, inctcal13, cal age interpolated at 14C dates	1	1	1
58.97	-9.61	150	19532.8	200	17310	130	NaN	NaN	NaN	NaN	16184	1126	130	1113	211.75	456	1	LGM (19-21.8)	DAPC2	Knutz et al., 2007		54.3206	radcal, inctcal13, cal age interpolated at 14C dates	1	1	1
58.97	-9.61	150	20177.1	200	17870	130	NaN	NaN	NaN	NaN	16682	1188	130	1179	210	456	1	LGM (19-21.8)	DAPC2	Knutz et al., 2007		41.8288	radcal, inctcal13, cal age interpolated at 14C dates	1	1	1
58.97	-9.61	150	22424.3	200	19730	140	NaN	NaN	NaN	NaN	18535	1195	140	1196	252.5	456	1		DAPC2	Knutz et al., 2007		41.8244	radcal, inctcal13, cal age interpolated at 14C dates	1	1	1
58.97	-9.61	150	22974.3	200	20280	150	NaN	NaN	NaN	NaN	19043	1237	150	1226	259.75	456	1		DAPC2	Knutz et al., 2007		43.3722	radcal, inctcal13, cal age interpolated at 14C dates	1	1	1
58.97	-9.61	150	23320.1	200	20450	170	NaN	NaN	NaN	NaN	19396	1054	170	1050	238.75	456	1		DAPC2	Knutz et al., 2007		27.8962	radcal, inctcal13, cal age interpolated at 14C dates	1	1	1
58.97	-9.61	150	23929.5	200	21410	200	NaN	NaN	NaN	NaN	19988	1422	200	1476	310.25	456	1		DAPC2	Knutz et al., 2007		23.9499	radcal, inctcal13, cal age interpolated at 14C dates	1	1	1
58.97	-9.61	150	25015.1	200	21860	190	NaN	NaN	NaN	NaN	20720	1140	190	1123	255.25	456	1	preLGM (25-30)	DAPC2	Knutz et al., 2007		22.1659	radcal, inctcal13, cal age interpolated at 14C dates	1	1	1
58.97	-9.61	150	25646.7	200	23660	210	NaN	NaN	NaN	NaN	21214	2446	210	2391	318.25	456	1	preLGM (25-30)	DAPC2	Knutz et al., 2007		19.2365	radcal, inctcal13, cal age interpolated at 14C dates	1	1	1
58.97	-9.61	150	26270.5	200	23950	220	NaN	NaN	NaN	NaN	21981	1969	220	1891	317.25	456	1	preLGM (25-30)	DAPC2	Knutz et al., 2007		22.3825	radcal, inctcal13, cal age interpolated at 14C dates	1	1	1
-54.8095	-62.167	816	11879	31.5	NaN	NaN	11050	70	NaN	NaN	10208	NaN	NaN	840	74	1168	8	YD (11.8-12.7)	NBP0805-TB04-Dn-E-003	Li et al. (2020)		NaN	Burdwood Bank	1	1	1
-59.7637	-68.9333	981	14478	63.5	NaN	NaN	13322	74	NaN	NaN	12413	NaN	NaN	904	79.75	1198	8	BA (12.8-14.8)	NBP1103- DH117-cc(f)-7	Li et al. (2020)		NaN	Sars Seamount	1	1	1
-54.8095	-62.167	334	13392	136.5	NaN	NaN	12722	70	NaN	NaN	11511	NaN	NaN	1196	167.25	1034	8	BA (12.8-14.8)	NBP1103-DH07-Bc-08	Li et al. (2020)		NaN	Burdwood Bank	1	1	1
-54.8095	-62.167	334	13727	89	NaN	NaN	12914	72	NaN	NaN	11801	NaN	NaN	1052	117.75	1034	8	BA (12.8-14.8)	NBP1103-DH07-Bc-1	Li et al. (2020)		NaN	Burdwood Bank	1	1	1
-54.8095	-62.167	334	14371	94	NaN	NaN	13188	42	NaN	NaN	12398	NaN	NaN	803	64.25	1034	8	BA (12.8-14.8)	NBP1103-DH07-Bc-10	Li et al. (2020)		NaN	Burdwood Bank	1	1	1
-54.8095	-62.167	334	14130	46	NaN	NaN	13127	76	NaN	NaN	12252	NaN	NaN	880	91.5	1034	8	BA (12.8-14.8)	NBP1103-DH07-Bc-12	Li et al. (2020)		NaN	Burdwood Bank	1	1	1
-54.8095	-62.167	334	14015	146.5	NaN	NaN	13084	72	NaN	NaN	12055	NaN	NaN	977	147	1034	8	BA (12.8-14.8)	NBP1103-DH07-Bc-16	Li et al. (2020)		NaN	Burdwood Bank	1	1	1
-54.8095	-62.167	334	13870	40	NaN	NaN	12963	74	NaN	NaN	12040	NaN	NaN	929	83.25	1034	8	BA (12.8-14.8)	NBP1103-DH07-Bc-3	Li et al. (2020)		NaN	Burdwood Bank	1	1	1
-54.8095	-62.167	334	14407	46	NaN	NaN	13227	76	NaN	NaN	12396	NaN	NaN	828	79.5	1034	8	BA (12.8-14.8)	NBP1103-DH07-Bc-6	Li et al. (2020)		NaN	Burdwood Bank	1	1	1
-54.8095	-62.167	334	14582	41	NaN	NaN	13247	76	NaN	NaN	12459	NaN	NaN	789	81	1034	8	BA (12.8-14.8)	NBP1103-DH07-Bc-7	Li et al. (2020)		NaN	Burdwood Bank	1	1	1
-54.8095	-62.167	334	14052	38	NaN	NaN	13093	82	NaN	NaN	12134	NaN	NaN	957	108.25	1034	8	BA (12.8-14.8)	NBP1103-DH07-Bn-2	Li et al. (2020)		NaN	Burdwood Bank	1	1	1
-54.8095	-62.167	334	13625	113	NaN	NaN	12625	71	NaN	NaN	11840	NaN	NaN	840	140.25	1034	8	BA (12.8-14.8)	NBP1103-DH07-Bn-21	Li et al. (2020)		NaN	Burdwood Bank	1	1	1
-59.7637	-68.9333	1662	10227	77	NaN	NaN	9864	60	NaN	NaN	9047.2	NaN	NaN	795	120	1290	8	EHOL (7-11)	NBP1103-DH112-Dc-1	Li et al. (2020)		NaN	Sars Seamount	1	1	1
-59.7637	-68.9333	1672	14826	56.5	NaN	NaN	14062	80	NaN	NaN	12458	NaN	NaN	1608	100.25	1290	8	BA (12.8-14.8)	NBP1103-DH113-Dc-1	Li et al. (2020)		NaN	Sars Seamount	1	1	1
-59.7637	-68.9333	843	15407	92	NaN	NaN	13767	76	NaN	NaN	12904	NaN	NaN	867	100.25	1198	8	HS1 (15-17.5)	NBP1103-DH115-cc-2	Li et al. (2020)		NaN	Sars Seamount	1	1	1
-59.7637	-68.9333	843	15200	61.5	NaN	NaN	13867	75	NaN	NaN	12744	NaN	NaN	1121	97	1198	8	HS1 (15-17.5)	NBP1103-DH115-Dc(f)-10	Li et al. (2020)		NaN	Sars Seamount	1	1	1
-59.7637	-68.9333	981	14888	217.5	NaN	NaN	13237	74	NaN	NaN	12506	NaN	NaN	713	147	1198	8		NBP1103-DH117-cc-16	Li et al. (2020)		NaN	Sars Seamount	1	1	1
-59.7637	-68.9333	981	14891	102.5	NaN	NaN	13499	74	NaN	NaN	12507	NaN	NaN	990	110.25	1198	8	BA (12.8-14.8)	NBP1103-DH117-cc-171	Li et al. (2020)		NaN	Sars Seamount	1	1	1
-59.7637	-68.9333	981	14775	98	NaN	NaN	13409	74	NaN	NaN	12375	NaN	NaN	960	97.75	1198	8	BA (12.8-14.8)	NBP1103-DH117-cc-175	Li et al. (2020)		NaN	Sars Seamount	1	1	1
-59.7637	-68.9333	981	14591	66	NaN	NaN	13384	74	NaN	NaN	12463	NaN	NaN	930	81.5	1198	8	BA (12.8-14.8)	NBP1103-DH117-cc-177	Li et al. (2020)		NaN	Sars Seamount	1	1	1
-59.7637	-68.9333	981	14896	83.5	NaN	NaN	13566	74	NaN	NaN	12508	NaN	NaN	1055	104	1198	8		NBP1103-DH117-cc-242	Li et al. (2020)		NaN	Sars Seamount	1	1	1
-59.7637	-68.9333	981	14701	67	NaN	NaN	13519	76	NaN	NaN	12443	NaN	NaN	1081	92.75	1198	8	BA (12.8-14.8)	NBP1103-DH117-Cc-249	Li et al. (2020)		NaN	Sars Seamount	1	1	1
-59.7637	-68.9333	981	15161	171.5	NaN	NaN	13433	76	NaN	NaN	12716	NaN	NaN	716	150.5	1198	8	HS1 (15-17.5)	NBP1103-DH117-cc-75	Li et al. (2020)		NaN	Sars Seamount	1	1	1
-59.7637	-68.9333	981	19400	337.5	NaN	NaN	17499	96	NaN	NaN	16032	NaN	NaN	1428	307.5	1198	8	LGM (19-21.8)	NBP1103-DH117-cc(f)-6	Li et al. (2020)		NaN	Sars Seamount	1	1	1
-59.7637	-68.9333	981	14316	90	NaN	NaN	13109	74	NaN	NaN	12360	NaN	NaN	750	90	1198	8	BA (12.8-14.8)	NBP1103-DH117-Dc-1	Li et al. (2020)		NaN	Sars Seamount	1	1	1
-59.7637	-68.9333	981	12030	46.5	NaN	NaN	11165	64	NaN	NaN	10312	NaN	NaN	847	70	1198	8	YD (11.8-12.7)	NBP1103-DH117-Dc-12	Li et al. (2020)		NaN	Sars Seamount	1	1	1
-59.7637	-68.9333	981	14746	56.5	NaN	NaN	13525	73	NaN	NaN	12368	NaN	NaN	1107	91.5	1198	8	BA (12.8-14.8)	NBP1103-DH117-Dc-14	Li et al. (2020)		NaN	Sars Seamount	1	1	1
-59.7637	-68.9333	981	15579	81.5	NaN	NaN	14203	76	NaN	NaN	12993	NaN	NaN	1203	103	1198	8	HS1 (15-17.5)	NBP1103-DH117-Dc-16	Li et al. (2020)		NaN	Sars Seamount	1	1	1
-59.7637	-68.9333	981	15043	50.5	NaN	NaN	13627	74	NaN	NaN	12623	NaN	NaN	1004	89	1198	8	HS1 (15-17.5)	NBP1103-DH117-Dc-18	Li et al. (2020)		NaN	Sars Seamount	1	1	1
-59.7637	-68.9333	981	14304	49	NaN	NaN	13219	72	NaN	NaN	12346	NaN	NaN	864	84	1198	8	BA (12.8-14.8)	NBP1103-DH117-Dc-21	Li et al. (2020)		NaN	Sars Seamount	1	1	1
-59.7637	-68.9333	981	15940	120	NaN	NaN	14436	76	NaN	NaN	13262	NaN	NaN	1164	115.25	1198	8	HS1 (15-17.5)	NBP1103-DH117-Dc-22	Li et al. (2020)		NaN	Sars Seamount	1	1	1
-59.7637	-68.9333	981	15238	79.5	NaN	NaN	13958	74	NaN	NaN	12773	NaN	NaN	1179	104.75	1198	8	HS1 (15-17.5)	NBP1103-DH117-Dc-23	Li et al. (2020)		NaN	Sars Seamount	1	1	1
-59.7637	-68.9333	981	14982	85.5	NaN	NaN	13582	72	NaN	NaN	12577	NaN	NaN	1006	102	1198	8	HS1 (15-17.5)	NBP1103-DH117-Dc-24	Li et al. (2020)		NaN	Sars Seamount	1	1	1
-59.7637	-68.9333	981	11618	53	NaN	NaN	11013	64	NaN	NaN	10058	NaN	NaN	961	71.25	1198	8		NBP1103-DH117-Dc-3	Li et al. (2020)		NaN	Sars Seamount	1	1	1
-59.7637	-68.9333	981	15311	61	NaN	NaN	13915	76	NaN	NaN	12847	NaN	NaN	1072	97.25	1198	8	HS1 (15-17.5)	NBP1103-DH117-Dc-32	Li et al. (2020)		NaN	Sars Seamount	1	1	1
-59.7637	-68.9333	981	14911	62	NaN	NaN	13514	74	NaN	NaN	12514	NaN	NaN	993	93.75	1198	8		NBP1103-DH117-Dc-35	Li et al. (2020)		NaN	Sars Seamount	1	1	1
-59.7637	-68.9333	981	15138	81.5	NaN	NaN	13486	74	NaN	NaN	12695	NaN	NaN	790	103.75	1198	8	HS1 (15-17.5)	NBP1103-DH117-Dc-5	Li et al. (2020)		NaN	Sars Seamount	1	1	1
-59.7637	-68.9333	981	15067	96.5	NaN	NaN	13769	74	NaN	NaN	12634	NaN	NaN	1128	109.5	1198	8	HS1 (15-17.5)	NBP1103-DH117-Dc-8	Li et al. (2020)		NaN	Sars Seamount	1	1	1
-59.7637	-68.9333	981	11794	53.5	NaN	NaN	10746	71	NaN	NaN	10121	NaN	NaN	598	83.5	1198	8	YD (11.8-12.7)	NBP1103-DH117-Dc(f)-16	Li et al. (2020)		NaN	Sars Seamount	1	1	1
-59.7637	-68.9333	981	13976	57	NaN	NaN	13000	82	NaN	NaN	12005	NaN	NaN	952	101.75	1198	8	BA (12.8-14.8)	NBP1103-DH117-Dc(f)-22	Li et al. (2020)		NaN	Sars Seamount	1	1	1
-59.7637	-68.9333	981	15863	71	NaN	NaN	14398	73	NaN	NaN	13224	NaN	NaN	1177	93.5	1198	8	HS1 (15-17.5)	NBP1103-DH117-Dc(f)-23	Li et al. (2020)		NaN	Sars Seamount	1	1	1
-59.7637	-68.9333	981	12460	82.5	NaN	NaN	11387	64	NaN	NaN	10396	NaN	NaN	955	96.25	1198	8	YD (11.8-12.7)	NBP1103-DH117-Dc(f)-37	Li et al. (2020)		NaN	Sars Seamount	1	1	1
-59.7637	-68.9333	981	11697	49.5	NaN	NaN	10900	72	NaN	NaN	10081	NaN	NaN	813	79.25	1198	8		NBP1103-DH117-Dc(f)-7	Li et al. (2020)		NaN	Sars Seamount	1	1	1
-59.7637	-68.9333	981	16142	190.5	NaN	NaN	14605	80	NaN	NaN	13399	NaN	NaN	1197	156	1198	8	HS1 (15-17.5)	NBP1103-DH117-Dc(f)-9	Li et al. (2020)		NaN	Sars Seamount	1	1	1
-59.7637	-68.9333	981	12539	77	NaN	NaN	11300	68	NaN	NaN	10516	NaN	NaN	798	103	1198	8	YD (11.8-12.7)	NBP1103-DH117-Dn-1	Li et al. (2020)		NaN	Sars Seamount	1	1	1
-59.7637	-68.9333	981	14227	61	NaN	NaN	13187	72	NaN	NaN	12315	NaN	NaN	876	84	1198	8	BA (12.8-14.8)	NBP1103-DH117-Dn-10	Li et al. (2020)		NaN	Sars Seamount	1	1	1
-59.7637	-68.9333	981	14813	81	NaN	NaN	13898	74	NaN	NaN	12437	NaN	NaN	1444	99	1198	8	BA (12.8-14.8)	NBP1103-DH117-Dn-12	Li et al. (2020)		NaN	Sars Seamount	1	1	1
-59.7637	-68.9333	981	10271	29	NaN	NaN	9996	62	NaN	NaN	9173.2	NaN	NaN	831	80.75	1198	8	EHOL (7-11)	NBP1103-DH117-Dn-2	Li et al. (2020)		NaN	Sars Seamount	1	1	1
-59.7637	-68.9333	1701	12831	66.5	NaN	NaN	11384	67	NaN	NaN	10933	NaN	NaN	444	116.25	1326	8	BA (12.8-14.8)	NBP1103-DH120-Dc-10	Li et al. (2020)		NaN	Sars Seamount	1	1	1
-59.7637	-68.9333	1701	12831	66.5	NaN	NaN	11647	68	NaN	NaN	10933	NaN	NaN	707	116.75	1326	8	BA (12.8-14.8)	NBP1103-DH120-Dc-10	Li et al. (2020)		NaN	Sars Seamount	1	1	1
-59.7637	-68.9333	1701	15107	59.5	NaN	NaN	14062	38	NaN	NaN	12664	NaN	NaN	1392	69	1326	8	HS1 (15-17.5)	NBP1103-DH120-Dc-11	Li et al. (2020)		NaN	Sars Seamount	1	1	1
-59.7637	-68.9333	1701	14791	72.5	NaN	NaN	13974	80	NaN	NaN	12399	NaN	NaN	1535	100.75	1326	8	BA (12.8-14.8)	NBP1103-DH120-Dc-14	Li et al. (2020)		NaN	Sars Seamount	1	1	1
-59.7637	-68.9333	1701	14740	65	NaN	NaN	13758	78	NaN	NaN	12375	NaN	NaN	1332	95.75	1326	8	BA (12.8-14.8)	NBP1103-DH120-Dc-15	Li et al. (2020)		NaN	Sars Seamount	1	1	1
-59.7637	-68.9333	1701	10375	68	NaN	NaN	9984	64	NaN	NaN	9213	NaN	NaN	764	79.5	1326	8	EHOL (7-11)	NBP1103-DH120-Dc-19	Li et al. (2020)		NaN	Sars Seamount	1	1	1
-59.7637	-68.9333	1701	15264	77.5	NaN	NaN	14298	80	NaN	NaN	12797	NaN	NaN	1497	107.5	1326	8	HS1 (15-17.5)	NBP1103-DH120-Dc-2	Li et al. (2020)		NaN	Sars Seamount	1	1	1
-59.7637	-68.9333	1701	16310	222	NaN	NaN	13750	74	NaN	NaN	13525	NaN	NaN	221	167.25	1326	8	HS1 (15-17.5)	NBP1103-DH120-Dc-20	Li et al. (2020)		NaN	Sars Seamount	1	1	1
-59.7637	-68.9333	1701	16310	222	NaN	NaN	14012	76	NaN	NaN	13525	NaN	NaN	483	168	1326	8	HS1 (15-17.5)	NBP1103-DH120-Dc-20	Li et al. (2020)		NaN	Sars Seamount	1	1	1
-59.7637	-68.9333	1701	15106	67	NaN	NaN	14170	80	NaN	NaN	12663	NaN	NaN	1500	100.5	1326	8	HS1 (15-17.5)	NBP1103-DH120-Dc-23	Li et al. (2020)		NaN	Sars Seamount	1	1	1
-59.7637	-68.9333	1701	15328	96	NaN	NaN	14405	73	NaN	NaN	12864	NaN	NaN	1553	105.25	1326	8	HS1 (15-17.5)	NBP1103-DH120-Dc-27	Li et al. (2020)		NaN	Sars Seamount	1	1	1
-59.7637	-68.9333	1701	12805	95.5	NaN	NaN	11670	74	NaN	NaN	10905	NaN	NaN	760	154	1326	8	BA (12.8-14.8)	NBP1103-DH120-Dc-29	Li et al. (2020)		NaN	Sars Seamount	1	1	1
-59.7637	-68.9333	1701	15484	70.5	NaN	NaN	14397	82	NaN	NaN	12929	NaN	NaN	1460	98	1326	8	HS1 (15-17.5)	NBP1103-DH120-Dc-3	Li et al. (2020)		NaN	Sars Seamount	1	1	1
-59.7637	-68.9333	1701	14980	57.5	NaN	NaN	14161	80	NaN	NaN	12575	NaN	NaN	1587	96.5	1326	8	HS1 (15-17.5)	NBP1103-DH120-Dc-5	Li et al. (2020)		NaN	Sars Seamount	1	1	1
-59.7637	-68.9333	1701	12001	83.5	NaN	NaN	11297	68	NaN	NaN	10309	NaN	NaN	1000	86.5	1326	8	YD (11.8-12.7)	NBP1103-DH120-Dc-57	Li et al. (2020)		NaN	Sars Seamount	1	1	1
-59.7637	-68.9333	1701	12064	79	NaN	NaN	11127	63	NaN	NaN	10341	NaN	NaN	796	75.75	1326	8	YD (11.8-12.7)	NBP1103-DH120-Dc-60	Li et al. (2020)		NaN	Sars Seamount	1	1	1
-59.7637	-68.9333	1701	15199	62	NaN	NaN	14203	82	NaN	NaN	12743	NaN	NaN	1458	102.25	1326	8	HS1 (15-17.5)	NBP1103-DH120-Dc-66	Li et al. (2020)		NaN	Sars Seamount	1	1	1
-59.7637	-68.9333	1701	12099	82	NaN	NaN	11251	64	NaN	NaN	10345	NaN	NaN	906	74.5	1326	8	YD (11.8-12.7)	NBP1103-DH120-Dc-8	Li et al. (2020)		NaN	Sars Seamount	1	1	1
-59.7637	-68.9333	1701	12798	124.5	NaN	NaN	11452	67	NaN	NaN	10910	NaN	NaN	549	170.75	1326	8		NBP1103-DH120-Dc-9	Li et al. (2020)		NaN	Sars Seamount	1	1	1
-59.7637	-68.9333	1701	11152	120	NaN	NaN	10181	69	NaN	NaN	9662.8	NaN	NaN	486	143.25	1326	8		NBP1103-DH120-Dc(f)-5	Li et al. (2020)		NaN	Sars Seamount	1	1	1
-59.7637	-68.9333	1701	12648	40	NaN	NaN	11797	69	NaN	NaN	10586	NaN	NaN	1205	92	1326	8	YD (11.8-12.7)	NBP1103-DH120-Dc(f)-7	Li et al. (2020)		NaN	Sars Seamount	1	1	1
-59.7637	-68.9333	1701	12302	48.5	NaN	NaN	11516	68	NaN	NaN	10387	NaN	NaN	1127	72.25	1326	8	YD (11.8-12.7)	NBP1103-DH120-Dc(f)-9	Li et al. (2020)		NaN	Sars Seamount	1	1	1
-57	-67	1012	16032	116	NaN	NaN	14064	80	NaN	NaN	13337	NaN	NaN	731	114.5	1215	8	HS1 (15-17.5)	NBP1103-DH134-Bc-214	Li et al. (2020)		NaN	Cape Horn	1	1	1
-57	-67	1012	15044	79	NaN	NaN	13486	78	NaN	NaN	12624	NaN	NaN	863	103.25	1215	8	HS1 (15-17.5)	NBP1103-DH134-Bc-227	Li et al. (2020)		NaN	Cape Horn	1	1	1
-57	-67	1012	15636	46.5	NaN	NaN	14000	80	NaN	NaN	13045	NaN	NaN	955	94.75	1215	8	HS1 (15-17.5)	NBP1103-DH134-Bc-233	Li et al. (2020)		NaN	Cape Horn	1	1	1
-57	-67	1012	15802	100.5	NaN	NaN	14086	74	NaN	NaN	13180	NaN	NaN	909	109	1215	8	HS1 (15-17.5)	NBP1103-DH134-Bc-234	Li et al. (2020)		NaN	Cape Horn	1	1	1
-57	-67	1012	15644	80.5	NaN	NaN	14018	80	NaN	NaN	13052	NaN	NaN	966	108	1215	8	HS1 (15-17.5)	NBP1103-DH134-Bc-239	Li et al. (2020)		NaN	Cape Horn	1	1	1
-57	-67	1012	14877	114.5	NaN	NaN	13266	72	NaN	NaN	12503	NaN	NaN	764	111.5	1215	8	BA (12.8-14.8)	NBP1103-DH134-Bc-437	Li et al. (2020)		NaN	Cape Horn	1	1	1
-57	-67	1012	15544	63	NaN	NaN	13859	74	NaN	NaN	12965	NaN	NaN	887	93.75	1215	8	HS1 (15-17.5)	NBP1103-DH134-Bc-443	Li et al. (2020)		NaN	Cape Horn	1	1	1
-57	-67	1012	15203	98.5	NaN	NaN	13444	85	NaN	NaN	12746	NaN	NaN	694	120.5	1215	8	HS1 (15-17.5)	NBP1103-DH134-Bc-686	Li et al. (2020)		NaN	Cape Horn	1	1	1
-57	-67	1012	15313	110	NaN	NaN	13994	75	NaN	NaN	12849	NaN	NaN	1155	113.5	1215	8	HS1 (15-17.5)	NBP1103-DH134-Cc-10	Li et al. (2020)		NaN	Cape Horn	1	1	1
-57	-67	1012	12310	71	NaN	NaN	11285	68	NaN	NaN	10365	NaN	NaN	899	73.5	1215	8	YD (11.8-12.7)	NBP1103-DH134-Fc-135	Li et al. (2020)		NaN	Cape Horn	1	1	1
-57	-67	1012	12420	87	NaN	NaN	11260	68	NaN	NaN	10341	NaN	NaN	853	95	1215	8	YD (11.8-12.7)	NBP1103-DH134-Fc-136	Li et al. (2020)		NaN	Cape Horn	1	1	1
-57	-67	1012	14165	80	NaN	NaN	13238	76	NaN	NaN	12274	NaN	NaN	968	108.75	1215	8	BA (12.8-14.8)	NBP1103-DH134-Fc-144	Li et al. (2020)		NaN	Cape Horn	1	1	1
-57	-67	1012	12363	42	NaN	NaN	11103	68	NaN	NaN	10366	NaN	NaN	724	72.75	1215	8	YD (11.8-12.7)	NBP1103-DH134-Fc-159	Li et al. (2020)		NaN	Cape Horn	1	1	1
-57	-67	1012	12421	72.5	NaN	NaN	11370	66	NaN	NaN	10343	NaN	NaN	969	91.75	1215	8	YD (11.8-12.7)	NBP1103-DH134-Fc-362	Li et al. (2020)		NaN	Cape Horn	1	1	1
-57	-67	1012	14683	71.5	NaN	NaN	13288	81	NaN	NaN	12467	NaN	NaN	844	95.5	1215	8	BA (12.8-14.8)	NBP1103-DH134-Fc-363	Li et al. (2020)		NaN	Cape Horn	1	1	1
-57	-67	1012	12398	35.5	NaN	NaN	11226	73	NaN	NaN	10359	NaN	NaN	856	77.75	1215	8	YD (11.8-12.7)	NBP1103-DH134-Fc-367	Li et al. (2020)		NaN	Cape Horn	1	1	1
-57	-67	1012	20252	219.5	NaN	NaN	18182	113	NaN	NaN	16738	NaN	NaN	1433	217	1215	8	LGM (19-21.8)	NBP1103-DH134-Fc-370	Li et al. (2020)		NaN	Cape Horn	1	1	1
-57	-67	1012	15821	82.5	NaN	NaN	14301	76	NaN	NaN	13195	NaN	NaN	1109	101.75	1215	8	HS1 (15-17.5)	NBP1103-DH134-Fc-388	Li et al. (2020)		NaN	Cape Horn	1	1	1
-57	-67	1012	14424	90	NaN	NaN	13298	72	NaN	NaN	12398	NaN	NaN	896	82.5	1215	8	BA (12.8-14.8)	NBP1103-DH134-Fc-527	Li et al. (2020)		NaN	Cape Horn	1	1	1
-57	-67	1012	14503	155	NaN	NaN	13226	72	NaN	NaN	12422	NaN	NaN	808	91.25	1215	8	BA (12.8-14.8)	NBP1103-DH134-Fc-534	Li et al. (2020)		NaN	Cape Horn	1	1	1
-57	-67	1012	14193	50.5	NaN	NaN	13209	73	NaN	NaN	12297	NaN	NaN	917	82	1215	8	BA (12.8-14.8)	NBP1103-DH134-Fc-536	Li et al. (2020)		NaN	Cape Horn	1	1	1
-57	-67	1012	12390	48.5	NaN	NaN	11231	64	NaN	NaN	10375	NaN	NaN	854	74	1215	8	YD (11.8-12.7)	NBP1103-DH134-Fc-545	Li et al. (2020)		NaN	Cape Horn	1	1	1
-57	-67	1012	14464	54	NaN	NaN	13320	72	NaN	NaN	12408	NaN	NaN	907	76.75	1215	8	BA (12.8-14.8)	NBP1103-DH134-Fc-760	Li et al. (2020)		NaN	Cape Horn	1	1	1
-57	-67	1012	12325	46	NaN	NaN	11352	66	NaN	NaN	10378	NaN	NaN	965	70.75	1215	8	YD (11.8-12.7)	NBP1103-DH134-Fc-762	Li et al. (2020)		NaN	Cape Horn	1	1	1
-57	-67	1012	12553	45	NaN	NaN	11434	66	NaN	NaN	10475	NaN	NaN	924	80.25	1215	8	YD (11.8-12.7)	NBP1103-DH134-Fc-763	Li et al. (2020)		NaN	Cape Horn	1	1	1
-57	-67	1012	14111	50	NaN	NaN	13150	72	NaN	NaN	12241	NaN	NaN	923	97.25	1215	8	BA (12.8-14.8)	NBP1103-DH134-Fc-779	Li et al. (2020)		NaN	Cape Horn	1	1	1
-54.8095	-62.167	727	15301	130	NaN	NaN	13672	56	NaN	NaN	12837	NaN	NaN	841	113	1168	8	HS1 (15-17.5)	NBP1103-DH14-Bc-1002	Li et al. (2020)		NaN	Burdwood Bank	1	1	1
-54.8095	-62.167	727	12536	58.5	NaN	NaN	11153	37	NaN	NaN	10526	NaN	NaN	649	73.25	1168	8	YD (11.8-12.7)	NBP1103-DH14-Bc-1003	Li et al. (2020)		NaN	Burdwood Bank	1	1	1
-54.8095	-62.167	727	13005	49.5	NaN	NaN	11742	56	NaN	NaN	11062	NaN	NaN	684	68.75	1168	8	BA (12.8-14.8)	NBP1103-DH14-Bn-278	Li et al. (2020)		NaN	Burdwood Bank	1	1	1
-54.8095	-62.167	727	16405	79.5	NaN	NaN	14718	77	NaN	NaN	13605	NaN	NaN	1119	99.5	1168	8	HS1 (15-17.5)	NBP1103-DH14-Fc-277	Li et al. (2020)		NaN	Burdwood Bank	1	1	1
-57	-67	648	16417	202	NaN	NaN	14351	79	NaN	NaN	13612	NaN	NaN	746	156.25	1084	8	HS1 (15-17.5)	NBP1103-DH140-Bc-2	Li et al. (2020)		NaN	Cape Horn	1	1	1
-57	-67	648	15158	86	NaN	NaN	13715	74	NaN	NaN	12713	NaN	NaN	1003	106.75	1084	8	HS1 (15-17.5)	NBP1103-DH140-Fc-a(1)	Li et al. (2020)		NaN	Cape Horn	1	1	1
-57	-67	1874	15768	108	NaN	NaN	14723	78	NaN	NaN	13151	NaN	NaN	1572	116.5	1335	8	HS1 (15-17.5)	NBP1103-DH143-D(f)-2	Li et al. (2020)		NaN	Cape Horn	1	1	1
-57	-67	1877	15810	69.5	NaN	NaN	14628	68	NaN	NaN	13187	NaN	NaN	1444	91.5	1335	8	HS1 (15-17.5)	NBP1103-DH143-D(f)-5	Li et al. (2020)		NaN	Cape Horn	1	1	1
-54.8095	-62.167	894	16855	89	NaN	NaN	14880	61	NaN	NaN	13846	NaN	NaN	1026	86	1210	8	HS1 (15-17.5)	NBP1103-DH15-Bc-1	Li et al. (2020)		NaN	Burdwood Bank	1	1	1
-54.8095	-62.167	1879	14699	97	NaN	NaN	13782	87	NaN	NaN	12446	NaN	NaN	1339	101.5	1328	8	BA (12.8-14.8)	NBP1103-DH22-Fn-04	Li et al. (2020)		NaN	Burdwood Bank	1	1	1
-54.8095	-62.167	1879	14768	50	NaN	NaN	13782	87	NaN	NaN	12368	NaN	NaN	1370	102.5	1328	8	BA (12.8-14.8)	NBP1103-DH22-Fn-04	Li et al. (2020)		NaN	Burdwood Bank	1	1	1
-60.1817	-57.8333	823	13324	41.5	NaN	NaN	12329	69	NaN	NaN	11471	NaN	NaN	872	89.5	1252	8	BA (12.8-14.8)	NBP1103-DH43-Dc-7	Li et al. (2020)		NaN	Shackleton Fracture Zone	1	1	1
-60.5625	-65.9567	1064	13636	119	NaN	NaN	12424	69	NaN	NaN	11812	NaN	NaN	630	144.25	1259	8	BA (12.8-14.8)	NBP1103-DH74-Dc-5	Li et al. (2020)		NaN	Interim Seamount	1	1	1
-59.7637	-68.9333	776	14627	121.5	NaN	NaN	13258	74	NaN	NaN	12475	NaN	NaN	816	87.75	1151	8	BA (12.8-14.8)	NBP1103-DH95-cc-1	Li et al. (2020)		NaN	Sars Seamount	1	1	1
-59.7637	-68.9333	776	12384	49.5	NaN	NaN	11342	68	NaN	NaN	10377	NaN	NaN	964	76.5	1151	8	YD (11.8-12.7)	NBP1103-DH95-cc-142	Li et al. (2020)		NaN	Sars Seamount	1	1	1
-59.7637	-68.9333	776	10267	54	NaN	NaN	9922	64	NaN	NaN	9173.6	NaN	NaN	774	104	1151	8	EHOL (7-11)	NBP1103-DH95-cc-143	Li et al. (2020)		NaN	Sars Seamount	1	1	1
-59.7637	-68.9333	776	11657	94	NaN	NaN	10678	66	NaN	NaN	10097	NaN	NaN	605	82	1151	8		NBP1103-DH95-cc-145	Li et al. (2020)		NaN	Sars Seamount	1	1	1
23.22	-111.08	150	11460	25	11450	35	NaN	NaN	NaN	NaN	10008	1442	35	1430	42	750	3		MV99-GC38	Lindsay et al. (2016)	Extreme depletions	2.1815		0	0	0
23.22	-111.08	150	11550	25	11340	35	NaN	NaN	NaN	NaN	10032	1308	35	1307	41.75	750	3		MV99-GC38	Lindsay et al. (2016)	Extreme depletions	2.33766		0	0	0
23.22	-111.08	150	11700	30	11910	35	NaN	NaN	NaN	NaN	10086	1824	35	1826	45.25	750	3		MV99-GC38	Lindsay et al. (2016)	Extreme depletions	2.47863		0	0	0
23.22	-111.08	150	12570	326	11875	30	NaN	NaN	NaN	NaN	10472	1403	30	1336	233.5	750	3		MV99-GC38	Lindsay et al. (2016)	Extreme depletions	2.86396		0	0	0
23.22	-111.08	150	13620	175	13030	30	NaN	NaN	NaN	NaN	11845	1185	30	1241	170.5	750	3	BA (12.8-14.8)	MV99-GC38	Lindsay et al. (2016)	Extreme depletions	3.01028		0	0	0
23.22	-111.08	150	13910	95	13090	30	NaN	NaN	NaN	NaN	12062	1028	30	1059	100.75	750	3	BA (12.8-14.8)	MV99-GC38	Lindsay et al. (2016)	Extreme depletions	3.0913		0	0	0
23.22	-111.08	150	14380	75	13715	40	NaN	NaN	NaN	NaN	12397	1318	40	1325	57.75	750	3	BA (12.8-14.8)	MV99-GC38	Lindsay et al. (2016)	Extreme depletions	3.26843		0	0	0
23.22	-111.08	150	14490	116.5	13895	30	NaN	NaN	NaN	NaN	12417	1478	30	1475	56.25	750	3	BA (12.8-14.8)	MV99-GC38	Lindsay et al. (2016)	Extreme depletions	3.45066		0	0	0
23.22	-111.08	150	14580	105	13755	30	NaN	NaN	NaN	NaN	12458	1297	30	1313	52.75	750	3	BA (12.8-14.8)	MV99-GC38	Lindsay et al. (2016)	Extreme depletions	3.56653		0	0	0
23.22	-111.08	150	14700	50	13845	30	NaN	NaN	NaN	NaN	12445	1400	30	1405	61.75	750	3	BA (12.8-14.8)	MV99-GC38	Lindsay et al. (2016)	Extreme depletions	3.7415		0	0	0
23.22	-111.08	150	15550	365	14630	40	NaN	NaN	NaN	NaN	12969	1661	40	1639	256.75	750	3	HS1 (15-17.5)	MV99-GC38	Lindsay et al. (2016)	Extreme depletions	3.66559		0	0	0
23.22	-111.08	150	16640	350	15090	40	NaN	NaN	NaN	NaN	13755	1335	40	1335	245.75	750	3	HS1 (15-17.5)	MV99-GC38	Lindsay et al. (2016)	Extreme depletions	3.54567		0	0	0
23.22	-111.08	150	17100	205	15300	30	NaN	NaN	NaN	NaN	14116	1184	30	1211	149	750	3	HS1 (15-17.5)	MV99-GC38	Lindsay et al. (2016)	Extreme depletions	3.56725		0	0	0
23.22	-111.08	150	18190	310	15735	40	NaN	NaN	NaN	NaN	14812	923	40	885	262.75	750	3		MV99-GC38	Lindsay et al. (2016)	Extreme depletions	3.46344		0	0	0
23.22	-111.08	150	18940	280	16210	40	NaN	NaN	NaN	NaN	15706	504	40	501	264.5	750	3	LGM (19-21.8)	MV99-GC38	Lindsay et al. (2016)	Extreme depletions	3.53749		0	0	0
23.22	-111.08	150	19940	316	17415	40	NaN	NaN	NaN	NaN	16534	881	40	890	266	750	3	LGM (19-21.8)	MV99-GC38	Lindsay et al. (2016)	Extreme depletions	3.81143		0	0	0
23.22	-111.08	150	20760	265	18270	50	NaN	NaN	NaN	NaN	17155	1115	50	1085	227.5	750	3	LGM (19-21.8)	MV99-GC38	Lindsay et al. (2016)	Extreme depletions	4.04624		0	0	0
23.22	-111.08	150	22250	375	19440	50	NaN	NaN	NaN	NaN	18281	1159	50	1135	322.25	750	3		MV99-GC38	Lindsay et al. (2016)	Extreme depletions	4.13483		0	0	0
23.22	-111.08	150	24550	515	21210	60	NaN	NaN	NaN	NaN	20397	813	60	766	358.5	750	3	preLGM (25-30)	MV99-GC38	Lindsay et al. (2016)	Extreme depletions	4.23625		0	0	0
23.22	-111.08	150	31150	225.5	26360	190	NaN	NaN	NaN	NaN	27094	-734	190	-755	407.75	750	3		MV99-GC38	Lindsay et al. (2016)	Extreme depletions, negative	4.7512		0	0	0
23.22	-111.08	1270	11460	25	NaN	NaN	11635	35	NaN	NaN	10008	NaN	NaN	1615	42	1812	3		MV99-GC38	Lindsay et al. (2016)	Extreme depletions	22.2222		0	0	0
23.22	-111.08	1270	11550	25	NaN	NaN	11985	35	NaN	NaN	10032	NaN	NaN	1952	41.75	1812	3		MV99-GC38	Lindsay et al. (2016)	Extreme depletions	13.3333		0	0	0
23.22	-111.08	1270	11700	30	NaN	NaN	12250	35	NaN	NaN	10086	NaN	NaN	2166	45.25	1812	3		MV99-GC38	Lindsay et al. (2016)	Extreme depletions	7.40741		0	0	0
23.22	-111.08	1270	11970	225	NaN	NaN	12665	40	NaN	NaN	10285	NaN	NaN	2387	113.75	1812	3	YD (11.8-12.7)	MV99-GC38	Lindsay et al. (2016)	Extreme depletions	8.10811		0	0	0
23.22	-111.08	1270	12340	321.5	NaN	NaN	12670	40	NaN	NaN	10424	NaN	NaN	2271	170.5	1812	3	YD (11.8-12.7)	MV99-GC38	Lindsay et al. (2016)	Extreme depletions	8.69565		0	0	0
23.22	-111.08	1270	12570	326	NaN	NaN	13150	40	NaN	NaN	10472	NaN	NaN	2610	236.5	1812	3		MV99-GC38	Lindsay et al. (2016)	Extreme depletions	4.83871		0	0	0
23.22	-111.08	1270	13190	364	NaN	NaN	13525	40	NaN	NaN	11355	NaN	NaN	2190	313.25	1812	3	BA (12.8-14.8)	MV99-GC38	Lindsay et al. (2016)	Extreme depletions	4.65116		0	0	0
23.22	-111.08	1270	13620	175	NaN	NaN	13545	40	NaN	NaN	11845	NaN	NaN	1758	173.5	1812	3	BA (12.8-14.8)	MV99-GC38	Lindsay et al. (2016)	Extreme depletions	6.89655		0	0	0
23.22	-111.08	1270	13910	95	NaN	NaN	13955	45	NaN	NaN	12062	NaN	NaN	1924	103.75	1812	3	BA (12.8-14.8)	MV99-GC38	Lindsay et al. (2016)	Extreme depletions	9.09091		0	0	0
23.22	-111.08	1270	14130	182	NaN	NaN	13420	40	NaN	NaN	12252	NaN	NaN	1174	136.75	1812	3	BA (12.8-14.8)	MV99-GC38	Lindsay et al. (2016)	Extreme depletions	8		0	0	0
23.22	-111.08	1270	14380	75	NaN	NaN	14125	45	NaN	NaN	12397	NaN	NaN	1736	61	1812	3	BA (12.8-14.8)	MV99-GC38	Lindsay et al. (2016)	Extreme depletions	27.2727		0	0	0
23.22	-111.08	1270	14490	116.5	NaN	NaN	14090	45	NaN	NaN	12417	NaN	NaN	1669	65	1812	3	BA (12.8-14.8)	MV99-GC38	Lindsay et al. (2016)	Extreme depletions	22.2222		0	0	0
23.22	-111.08	1270	14580	105	NaN	NaN	14360	45	NaN	NaN	12458	NaN	NaN	1919	62.25	1812	3	BA (12.8-14.8)	MV99-GC38	Lindsay et al. (2016)	Extreme depletions	25		0	0	0
23.22	-111.08	1270	14700	50	NaN	NaN	14835	50	NaN	NaN	12445	NaN	NaN	2397	73.75	1812	3	BA (12.8-14.8)	MV99-GC38	Lindsay et al. (2016)	Extreme depletions	2.35294		0	0	0
23.22	-111.08	1270	15550	365	NaN	NaN	15970	60	NaN	NaN	12969	NaN	NaN	2977	260.75	1812	3	HS1 (15-17.5)	MV99-GC38	Lindsay et al. (2016)	Extreme depletions	1.83486		0	0	0
23.22	-111.08	1270	16640	350	NaN	NaN	16290	40	NaN	NaN	13755	NaN	NaN	2535	245.75	1812	3	HS1 (15-17.5)	MV99-GC38	Lindsay et al. (2016)	Extreme depletions	4.34783		0	0	0
23.22	-111.08	1270	17100	205	NaN	NaN	16420	40	NaN	NaN	14116	NaN	NaN	2334	173.5	1812	3	HS1 (15-17.5)	MV99-GC38	Lindsay et al. (2016)	Extreme depletions	1.83486		0	0	0
23.22	-111.08	1270	18190	310	NaN	NaN	16610	40	NaN	NaN	14812	NaN	NaN	1760	262.75	1812	3		MV99-GC38	Lindsay et al. (2016)	Extreme depletions	4.87805		0	0	0
23.22	-111.08	1270	18600	378	NaN	NaN	17100	40	NaN	NaN	15147	NaN	NaN	1832	281.75	1812	3		MV99-GC38	Lindsay et al. (2016)	Extreme depletions	6.77966		0	0	0
23.22	-111.08	1270	19190	323	NaN	NaN	17135	40	NaN	NaN	15935	NaN	NaN	1206	298	1812	3	LGM (19-21.8)	MV99-GC38	Lindsay et al. (2016)	Extreme depletions	3.59562		0	0	0
23.61	-111.56	150	12430	210	12825	45	NaN	NaN	NaN	NaN	10363	2462	45	2396	124.75	750	3	YD (11.8-12.7)	MV99-MC17/GC32/PC10	Lindsay et al. (2016)	Extreme depletions	21.7216		0	0	0
23.61	-111.56	150	13200	385	13035	50	NaN	NaN	NaN	NaN	11356	1679	50	1689	321	750	3	BA (12.8-14.8)	MV99-MC17/GC32/PC10	Lindsay et al. (2016)	Extreme depletions	21.0606		0	0	0
23.61	-111.56	150	13440	115	12820	50	NaN	NaN	NaN	NaN	11547	1273	50	1249	137.5	750	3	BA (12.8-14.8)	MV99-MC17/GC32/PC10	Lindsay et al. (2016)	Extreme depletions	21.2054		0	0	0
23.61	-111.56	150	13630	85	13045	35	NaN	NaN	NaN	NaN	11826	1219	35	1247	96.25	750	3	BA (12.8-14.8)	MV99-MC17/GC32/PC10	Lindsay et al. (2016)	Extreme depletions	21.4233		0	0	0
23.61	-111.56	150	13810	70	13055	35	NaN	NaN	NaN	NaN	12013	1042	35	1079	85.5	750	3	BA (12.8-14.8)	MV99-MC17/GC32/PC10	Lindsay et al. (2016)	Extreme depletions	21.651		0	0	0
23.61	-111.56	150	13940	109.5	13425	45	NaN	NaN	NaN	NaN	12020	1405	45	1381	117.5	750	3	BA (12.8-14.8)	MV99-MC17/GC32/PC10	Lindsay et al. (2016)	Extreme depletions	21.9512		0	0	0
23.61	-111.56	150	14100	50	13335	50	NaN	NaN	NaN	NaN	12228	1107	50	1118	86.5	750	3	BA (12.8-14.8)	MV99-MC17/GC32/PC10	Lindsay et al. (2016)	Extreme depletions	22.1986		0	0	0
23.61	-111.56	150	14260	55	13380	60	NaN	NaN	NaN	NaN	12325	1055	60	1052	73.5	750	3	BA (12.8-14.8)	MV99-MC17/GC32/PC10	Lindsay et al. (2016)	Extreme depletions	22.4404		0	0	0
23.61	-111.56	150	14430	130.5	13285	35	NaN	NaN	NaN	NaN	12398	887	35	882	66.75	750	3	BA (12.8-14.8)	MV99-MC17/GC32/PC10	Lindsay et al. (2016)	Extreme depletions	22.6611		0	0	0
23.61	-111.56	150	14600	166.5	13155	35	NaN	NaN	NaN	NaN	12466	689	35	720	68.25	750	3	BA (12.8-14.8)	MV99-MC17/GC32/PC10	Lindsay et al. (2016)	Extreme depletions	22.8767		0	0	0
23.61	-111.56	150	14860	149	14330	40	NaN	NaN	NaN	NaN	12494	1836	40	1832	103.25	750	3		MV99-MC17/GC32/PC10	Lindsay et al. (2016)	Extreme depletions	22.9475		0	0	0
23.61	-111.56	150	16430	1061	13625	40	NaN	NaN	NaN	NaN	13618	7	40	-51	634	750	3	HS1 (15-17.5)	MV99-MC17/GC32/PC10	Lindsay et al. (2016)	Extreme depletions, negative	21.6068		0	0	0
23.61	-111.56	150	17230	1569	16530	70	NaN	NaN	NaN	NaN	14149	2381	70	2155	1155.75	750	3	HS1 (15-17.5)	MV99-MC17/GC32/PC10	Lindsay et al. (2016)	Extreme depletions	21.0099		0	0	0
23.61	-111.56	150	17920	1746	17200	70	NaN	NaN	NaN	NaN	14635	2565	70	2261	1148.25	750	3		MV99-MC17/GC32/PC10	Lindsay et al. (2016)	Extreme depletions	20.5915		0	0	0
23.61	-111.56	150	18710	1240	15160	60	NaN	NaN	NaN	NaN	15369	-209	60	-458	932.5	750	3		MV99-MC17/GC32/PC10	Lindsay et al. (2016)	Extreme depletions, negative	20.0962		0	0	0
23.61	-111.56	150	19480	745	16720	70	NaN	NaN	NaN	NaN	16111	609	70	521	582	750	3	LGM (19-21.8)	MV99-MC17/GC32/PC10	Lindsay et al. (2016)	Extreme depletions	19.6612		0	0	0
23.61	-111.56	150	20250	298	17440	60	NaN	NaN	NaN	NaN	16736	704	60	692	243.5	750	3	LGM (19-21.8)	MV99-MC17/GC32/PC10	Lindsay et al. (2016)	Extreme depletions	19.2593		0	0	0
23.61	-111.56	150	22300	800	19580	80	NaN	NaN	NaN	NaN	18332	1248	80	1135	603.75	750	3	LGM (19-21.8)	MV99-MC17/GC32/PC10	Lindsay et al. (2016)	Extreme depletions	18.7444		0	0	0
23.61	-111.56	150	25680	1533	22940	190	NaN	NaN	NaN	NaN	21265	1675	190	1221	1442.25	750	3	preLGM (25-30)	MV99-MC17/GC32/PC10	Lindsay et al. (2016)	Extreme depletions	18.1854		0	0	0
23.61	-111.56	430	11060	351	NaN	NaN	10865	30	NaN	NaN	9547	NaN	NaN	1231	229.5	1003	3	EHOL (7-11)	MV99-MC17/GC32/PC10	Lindsay et al. (2016)	Extreme depletions	14.9		0	0	0
23.61	-111.56	430	11390	212	NaN	NaN	10790	30	NaN	NaN	9955	NaN	NaN	805	152.5	1003	3		MV99-MC17/GC32/PC10	Lindsay et al. (2016)	Extreme depletions	14.9		0	0	0
23.61	-111.56	430	11560	174.5	NaN	NaN	12000	70	NaN	NaN	10025	NaN	NaN	1956	119	1003	3		MV99-MC17/GC32/PC10	Lindsay et al. (2016)	Extreme depletions	14.9		0	0	0
23.61	-111.56	430	11950	115	NaN	NaN	12590	35	NaN	NaN	10281	NaN	NaN	2326	81.25	1003	3	YD (11.8-12.7)	MV99-MC17/GC32/PC10	Lindsay et al. (2016)	Extreme depletions	14.9		0	0	0
23.61	-111.56	430	12430	210	NaN	NaN	13375	40	NaN	NaN	10363	NaN	NaN	2948	121.75	1003	3	YD (11.8-12.7)	MV99-MC17/GC32/PC10	Lindsay et al. (2016)	Extreme depletions	14.9		0	0	0
23.61	-111.56	430	12680	282	NaN	NaN	12700	80	NaN	NaN	10622	NaN	NaN	2029	275	1003	3		MV99-MC17/GC32/PC10	Lindsay et al. (2016)	Extreme depletions	14.9		0	0	0
23.61	-111.56	430	13200	385	NaN	NaN	13055	35	NaN	NaN	11356	NaN	NaN	1707	313.5	1003	3	BA (12.8-14.8)	MV99-MC17/GC32/PC10	Lindsay et al. (2016)	Extreme depletions	14.9		0	0	0
23.61	-111.56	430	13430	115	NaN	NaN	13130	35	NaN	NaN	11541	NaN	NaN	1572	132.75	1003	3	BA (12.8-14.8)	MV99-MC17/GC32/PC10	Lindsay et al. (2016)	Extreme depletions	14.9		0	0	0
23.61	-111.56	430	13630	85	NaN	NaN	13165	35	NaN	NaN	11826	NaN	NaN	1367	96.25	1003	3	BA (12.8-14.8)	MV99-MC17/GC32/PC10	Lindsay et al. (2016)	Extreme depletions	14.9		0	0	0
23.61	-111.56	430	13810	70	NaN	NaN	12980	35	NaN	NaN	12013	NaN	NaN	1004	85.5	1003	3	BA (12.8-14.8)	MV99-MC17/GC32/PC10	Lindsay et al. (2016)	Extreme depletions	14.9		0	0	0
23.61	-111.56	430	13940	109.5	NaN	NaN	13090	35	NaN	NaN	12020	NaN	NaN	1047	115	1003	3	BA (12.8-14.8)	MV99-MC17/GC32/PC10	Lindsay et al. (2016)	Extreme depletions	14.9		0	0	0
23.61	-111.56	430	14100	50	NaN	NaN	13080	35	NaN	NaN	12228	NaN	NaN	861	78.5	1003	3	BA (12.8-14.8)	MV99-MC17/GC32/PC10	Lindsay et al. (2016)	Extreme depletions	14.9		0	0	0
23.61	-111.56	430	14260	55	NaN	NaN	13420	35	NaN	NaN	12325	NaN	NaN	1093	56	1003	3	BA (12.8-14.8)	MV99-MC17/GC32/PC10	Lindsay et al. (2016)	Extreme depletions	14.9		0	0	0
23.61	-111.56	430	14420	123	NaN	NaN	13300	75	NaN	NaN	12397	NaN	NaN	902	92	1003	3	BA (12.8-14.8)	MV99-MC17/GC32/PC10	Lindsay et al. (2016)	Extreme depletions	14.9		0	0	0
23.61	-111.56	430	11950	115	12230	45	NaN	NaN	NaN	NaN	10281	1949	45	1967	86.25	1003	3	YD (11.8-12.7)	MV99-MC17/GC32/PC10	Lindsay et al. (2016)	Extreme depletions	22.0084		0	0	0
42.12	-125.75	2710	8158	110	8200	40	9580	40	1380	57	7290	910	40	2232	117.5	2252	3	EHOL (7-11)	W8709A-13PC	Lund et al. (2011)		8.45796		1	1	1
42.12	-125.75	2710	8680	103	8680	60	9975	40	1295	72	7903	777	60	2068	87.5	2252	3	EHOL (7-11)	W8709A-13PC	Lund et al. (2011)		9.10138		1	1	1
42.12	-125.75	2710	9016.5	100	8895	40	10085	40	1190	57	8114.9	780.1	40	1984	95.5	2252	3	EHOL (7-11)	W8709A-13PC	Lund et al. (2011)		9.64898		1	1	1
42.12	-125.75	2710	9565.5	98	9400	80	10540	40	1140	89	8701.4	698.6	80	1888	127.5	2252	3	EHOL (7-11)	W8709A-13PC	Lund et al. (2011)		10.2452		1	1	1
42.12	-125.75	2710	9837	102	9580	70	10740	45	1160	83	8809	771	70	1931	71.75	2252	3	EHOL (7-11)	W8709A-13PC	Lund et al. (2011)		10.5723		1	1	1
42.12	-125.75	2710	10365	117	9940	70	11270	50	1330	86	9201	739	70	2055	128.25	2252	3	EHOL (7-11)	W8709A-13PC	Lund et al. (2011)		11.8669		1	1	1
42.12	-125.75	2710	11288	122	10610	80	12160	45	1550	92	9935	675	80	2246	130	2252	3		W8709A-13PC	Lund et al. (2011)		12.4911		1	1	1
42.12	-125.75	2710	11751.5	84	11005	40	12520	35	1515	53	10124	881	40	2401	66.5	2252	3	YD (11.8-12.7)	W8709A-13PC	Lund et al. (2011)		12.4239		1	1	1
42.12	-125.75	2710	11913	127	10985	40	12685	35	1700	53	10211	774	40	2450	87.5	2252	3	YD (11.8-12.7)	W8709A-13PC	Lund et al. (2011)		13.0949		1	1	1
42.12	-125.75	2710	12619	130	11615	45	13115	35	1500	57	10570	1045	45	2544	117.5	2252	3	YD (11.8-12.7)	W8709A-13PC	Lund et al. (2011)		12.7585		1	1	1
42.12	-125.75	2710	13043	73	12035	45	13700	50	1665	67	11054	981	45	2616	98.5	2252	3	BA (12.8-14.8)	W8709A-13PC	Lund et al. (2011)		13.5705		1	1	1
42.12	-125.75	2710	13510	105	12510	60	14115	40	1605	72	11689	821	60	2453	118.5	2252	3	BA (12.8-14.8)	W8709A-13PC	Lund et al. (2011)		13.7676		1	1	1
42.12	-125.75	2710	14260	131	13080	35	14545	45	1465	57	12325	755	35	2217	103.5	2252	3	BA (12.8-14.8)	W8709A-13PC	Lund et al. (2011)		14.0954		1	1	1
42.12	-125.75	2710	15348	116	13770	35	15155	50	1385	61	12880	890	35	2289	100	2252	3	HS1 (15-17.5)	W8709A-13PC	Lund et al. (2011)		14.0735		1	1	1
42.12	-125.75	2710	15659	107	14015	35	15550	99	1535	105	13064	951	35	2485	132.25	2252	3	HS1 (15-17.5)	W8709A-13PC	Lund et al. (2011)		14.0494		1	1	1
42.12	-125.75	2710	16280	70	14490	35	16025	50	1535	61	13498	992	35	2523	80.75	2252	3	HS1 (15-17.5)	W8709A-13PC	Lund et al. (2011)		14.4963		1	1	1
42.12	-125.75	2710	16536	56	14690	35	16290	60	1600	69	13675	1015	35	2610	79.75	2252	3	HS1 (15-17.5)	W8709A-13PC	Lund et al. (2011)		14.6347		1	1	1
42.12	-125.75	2710	16782	79	14840	45	16690	60	1850	75	13822	1018	45	2868	77	2252	3	HS1 (15-17.5)	W8709A-13PC	Lund et al. (2011)		14.9565		1	1	1
42.12	-125.75	2710	17205	111	15260	35	16990	120	1730	125	14153	1107	35	2837	155.25	2252	3	HS1 (15-17.5)	W8709A-13PC	Lund et al. (2011)		14.9375		1	1	1
42.12	-125.75	2710	17532.5	76	15500	40	17015	127	1515	133	14456	1044	40	2574	138	2252	3	HS1 (15-17.5)	W8709A-13PC	Lund et al. (2011)		15.2289		1	1	1
42.12	-125.75	2710	17745	168	15620	35	17200	157	1580	161	14474	1146	35	2683	186.75	2252	3		W8709A-13PC	Lund et al. (2011)		15.3846		1	1	1
42.12	-125.75	2710	20368	283	17940	45	19170	156	1230	162	16831	1109	45	2314	283.25	2252	3	LGM (19-21.8)	W8709A-13PC	Lund et al. (2011)		15.3181		1	1	1
42.12	-125.75	2710	22355.5	230	19640	60	21530	142	1890	154	18409	1231	60	3092	276.75	2252	3		W8709A-13PC	Lund et al. (2011)		15.1641		1	1	1
-27.4833	-46.3333	1829	640	10	1235	15	2305	35	1070	38	626	609	15	1672	42.75	887	2	HOL (<6)	KNR159-5 78GGC	Lund et al. (2015)	Low sed rate <2cm/kyr *	1.5625		0	1	0
-27.4833	-46.3333	1829	6012	24	5810	15	6260	40	450	43	5309.8	500.2	15	967	58.25	887	2	HOL (<6)	KNR159-5 78GGC	Lund et al. (2015)	Low sed rate <2cm/kyr *	1.49701		0	1	0
-27.4833	-46.3333	1829	7808	22	7530	20	9040	70	1510	73	6989	541	20	2062	74.25	887	2	EHOL (7-11)	KNR159-5 78GGC	Lund et al. (2015)	Low sed rate <2cm/kyr *	1.66496		0	1	0
-27.4833	-46.3333	1829	9312	31	8800	25	10535	45	1735	51	8316.4	483.6	25	2224	60.25	887	2	EHOL (7-11)	KNR159-5 78GGC	Lund et al. (2015)	Low sed rate <2cm/kyr *	1.8256		0	1	0
-27.4833	-46.3333	1829	11364	38	10390	20	12055	40	1665	45	9987	403	20	2081	54.75	887	2		KNR159-5 78GGC	Lund et al. (2015)	Anomalous signal - bioturbation issues suspected	2.19993		1	1	1
-27.4833	-46.3333	1829	13869	49	12475	35	13295	45	820	57	12038	437	35	1266	67.5	887	2	BA (12.8-14.8)	KNR159-5 78GGC	Lund et al. (2015)	Anomalous signal - bioturbation issues suspected	2.37941		1	1	1
-27.4833	-46.3333	1829	14141	53	12685	35	13715	40	1030	53	12256	429	35	1458	69.5	887	2	BA (12.8-14.8)	KNR159-5 78GGC	Lund et al. (2015)	Anomalous signal - bioturbation issues suspected	2.61651		1	1	1
-27.4833	-46.3333	1829	15336	55	13435	40	14490	70	1055	81	12871	564	40	1627	89	887	2	HS1 (15-17.5)	KNR159-5 78GGC	Lund et al. (2015)	Anomalous signal - bioturbation issues suspected	2.93427		1	1	1
-27.4833	-46.3333	1829	15801	50	13785	35	14730	60	945	69	13179	606	35	1551	79.75	887	2	HS1 (15-17.5)	KNR159-5 78GGC	Lund et al. (2015)	Anomalous signal - bioturbation issues suspected	3.10107		1	1	1
-27.4833	-46.3333	1829	16189	66	14085	54	15078	71	993	89	13429	656	54	1644	89	887	2	HS1 (15-17.5)	KNR159-5 78GGC	Lund et al. (2015)	Anomalous signal - bioturbation issues suspected	3.64445		1	1	1
-27.4833	-46.3333	1829	17267	74	14960	60	15790	45	830	75	14152	808	60	1615	90.75	887	2	HS1 (15-17.5)	KNR159-5 78GGC	Lund et al. (2015)	Anomalous signal - bioturbation issues suspected	5.15434		1	1	1
-27.4833	-46.3333	1829	17367	96	15040	70	15840	40	800	81	14275	765	70	1557	111.75	887	2	HS1 (15-17.5)	KNR159-5 78GGC	Lund et al. (2015)	Anomalous signal - bioturbation issues suspected	5.58531		1	1	1
-27.4833	-46.3333	1829	17808	61	15360	50	15810	50	450	71	14523	837	50	1281	87	887	2		KNR159-5 78GGC	Lund et al. (2015)	Anomalous signal - bioturbation issues suspected	5.89623		1	1	1
-27.4833	-46.3333	1829	18184	67	15723	72	16408	78	685	106	14800	923	72	1587	154.5	887	2		KNR159-5 78GGC	Lund et al. (2015)	Anomalous signal - bioturbation issues suspected	6.32424		1	1	1
-27.4833	-46.3333	1829	18676	50	16160	60	16900	60	740	85	15316	844	60	1587	111.75	887	2		KNR159-5 78GGC	Lund et al. (2015)	Anomalous signal - bioturbation issues suspected	6.69308		1	1	1
-27.4833	-46.3333	1829	19248	86	16700	70	17250	70	550	99	15971	729	70	1289	95	887	2	LGM (19-21.8)	KNR159-5 78GGC	Lund et al. (2015)	Anomalous signal - bioturbation issues suspected	7.11762		1	1	1
-27.4833	-46.3333	1829	19594	76	16990	60	17720	80	730	100	16300	690	60	1434	127.5	887	2	LGM (19-21.8)	KNR159-5 78GGC	Lund et al. (2015)	Anomalous signal - bioturbation issues suspected	7.80851		1	1	1
14.5	93.1167	1375	2651	146	3060	60	4180	60	1120	85	2462	598	60	1666	135.5	1533	5	HOL (<6)	MD77-176	Ma et al. (2020)		58.6455		1	1	1
14.5	93.1167	1375	2651	146	NaN	NaN	4270	55	NaN	NaN	2462	NaN	NaN	1758	132.5	1533	5	HOL (<6)	MD77-176	Ma et al. (2020)		58.6455		1	1	1
14.5	93.1167	1375	5294	157.5	5120	70	5870	60	750	92	4538.2	581.8	70	1295	131.75	1533	5	HOL (<6)	MD77-176	Ma et al. (2020)		58.6455		1	1	1
14.5	93.1167	1375	5294	157.5	NaN	NaN	6110	70	NaN	NaN	4538.2	NaN	NaN	1532	137.75	1533	5	HOL (<6)	MD77-176	Ma et al. (2020)		42.886		1	1	1
14.5	93.1167	1375	7276	149	6960	80	7890	90	930	120	6372.2	587.8	80	1533	175.75	1533	5	EHOL (7-11)	MD77-176	Ma et al. (2020)		34.6715		1	1	1
14.5	93.1167	1375	10016	144	NaN	NaN	9700	90	NaN	NaN	8900.8	NaN	NaN	814	136	1533	5	EHOL (7-11)	MD77-176	Ma et al. (2020)		21.5208		1	1	1
14.5	93.1167	1375	10016	144	9350	45	9730	100	380	110	8900.8	449.2	45	843	142	1533	5	EHOL (7-11)	MD77-176	Ma et al. (2020)		34.6715		1	1	1
14.5	93.1167	1375	12107	221.25	10950	90	11080	100	130	135	10373	577	90	750	145	1533	5	YD (11.8-12.7)	MD77-176	Ma et al. (2020)		67.6393		1	1	1
14.5	93.1167	1375	12861	148	11450	90	11650	90	200	127	10980	470	90	689	206.75	1533	5	BA (12.8-14.8)	MD77-176	Ma et al. (2020)		22.3624		1	1	1
14.5	93.1167	1375	14605	271.25	12910	110	13680	110	770	156	12468	442	110	1245	162.5	1533	5	BA (12.8-14.8)	MD77-176	Ma et al. (2020)		11.4416		1	1	1
14.5	93.1167	1375	17227	232.75	14880	70	15260	80	380	106	14149	731	70	1090	199.5	1533	5	HS1 (15-17.5)	MD77-176	Ma et al. (2020)		12.9366		1	1	1
14.5	93.1167	1375	18773	199.5	16420	70	17250	280	830	289	15441	979	70	1784	360.25	1533	5		MD77-176	Ma et al. (2020)		46.8521		1	1	1
14.5	93.1167	1375	19456	253	16660	120	17950	130	1290	177	16085	575	120	1828	244.25	1533	5	LGM (19-21.8)	MD77-176	Ma et al. (2020)		16.9282		1	1	1
14.5	93.1167	1375	26722	283.75	23420	140	23550	360	130	386	22374	1046	140	1131	430.75	1533	5	preLGM (25-30)	MD77-176	Ma et al. (2020)		16.9282		1	1	1
34.28	-120.03	576.5	15518	377	13800	280	14030	160	230	322	12947	853	280	1052	303.75	1430	3	HS1 (15-17.5)	ODP893A	Magana et al. (2010)		178.18		1	1	1
34.28	-120.03	576.5	16670	169	14690	140	15240	220	550	261	13774	916	140	1478	240.25	1430	3	HS1 (15-17.5)	ODP893A	Magana et al. (2010)		168.146		1	1	1
34.28	-120.03	576.5	16722	217	14740	180	15510	140	770	228	13801	939	180	1718	201.75	1430	3	HS1 (15-17.5)	ODP893A	Magana et al. (2010)		170.733		1	1	1
34.28	-120.03	576.5	16976	191	14940	160	15820	150	880	219	13922	1018	160	1860	210.5	1430	3	HS1 (15-17.5)	ODP893A	Magana et al. (2010)		176.013		1	1	1
34.28	-120.03	576.5	17372	80	15280	60	15440	210	160	218	14284	996	60	1150	233	1430	3	HS1 (15-17.5)	ODP893A	Magana et al. (2010)		174.534		1	1	1
34.28	-120.03	576.5	17974	145	15750	130	16180	240	430	273	14670	1080	130	1517	269.75	1430	3		ODP893A	Magana et al. (2010)		174.697		1	1	1
34.28	-120.03	576.5	18053	155	15830	140	16130	60	300	152	14705	1125	140	1419	159.5	1430	3		ODP893A	Magana et al. (2010)		176.037		1	1	1
2.31167	-30.6467	2306	13950	140	NaN	NaN	13530	110	NaN	NaN	12008	NaN	NaN	1472	167.75	782	1	BA (12.8-14.8)	GeoB 1503-1	Mangini et al. (1998)		NaN		1	1	1
-24.2	-43.3	781	10522	83	NaN	NaN	11233	53	NaN	NaN	9334.2	NaN	NaN	1918	87.25	795	2	EHOL (7-11)	21210009	Mangini et al. (2010)	Seem anomalous wrt other data	NaN		1	1	1
-24.2	-43.3	781	10532	95	NaN	NaN	11135	30	NaN	NaN	9331.2	NaN	NaN	1812	80.5	795	2	EHOL (7-11)	21210009	Mangini et al. (2010)	Seem anomalous wrt other data	NaN		1	1	1
-24.2	-43.3	781	12612	168	NaN	NaN	10925	30	NaN	NaN	10538	NaN	NaN	358	115.25	795	2	YD (11.8-12.7)	21210009	Mangini et al. (2010)	Seem anomalous wrt other data	NaN		1	1	1
-24.2	-43.3	781	12932	173	NaN	NaN	10950	35	NaN	NaN	11045	NaN	NaN	72	-71.75	795	2	BA (12.8-14.8)	21210009	Mangini et al. (2010)	Seem anomalous wrt other data	NaN		1	1	1
-24.2	-43.3	781	16352	175	NaN	NaN	14975	40	NaN	NaN	13565	NaN	NaN	1413	128.5	795	2	HS1 (15-17.5)	21210009	Mangini et al. (2010)	Seem anomalous wrt other data	NaN		1	1	1
-24.2	-43.3	781	23522	188	NaN	NaN	22950	155	NaN	NaN	19550	NaN	NaN	3451	221.25	795	2		21210009	Mangini et al. (2010)	Seem anomalous wrt other data	NaN		1	1	1
-24.2	-43.3	781	25242	343	NaN	NaN	23540	180	NaN	NaN	20966	NaN	NaN	2588	349.75	795	2	preLGM (25-30)	21210009	Mangini et al. (2010)	Seem anomalous wrt other data	NaN		1	1	1
-24.2	-43.3	781	25952	183	NaN	NaN	23260	165	NaN	NaN	21740	NaN	NaN	1528	299.5	795	2	preLGM (25-30)	21210009	Mangini et al. (2010)	Seem anomalous wrt other data	NaN		1	1	1
-24.2	-43.3	781	26932	133	NaN	NaN	22710	160	NaN	NaN	22483	NaN	NaN	208	100.25	795	2	preLGM (25-30)	21210009	Mangini et al. (2010)	Seem anomalous wrt other data	NaN		1	1	1
-24.2	-43.3	781	27872	313	NaN	NaN	23000	90	NaN	NaN	23857	NaN	NaN	850	-320.75	795	2	preLGM (25-30)	21210009	Mangini et al. (2010)	Seem anomalous wrt other data	NaN		1	1	1
-22.4	-40	621	8442	145	NaN	NaN	10940	20	NaN	NaN	7687	NaN	NaN	3254	148	766	2	EHOL (7-11)	ENG-111	Mangini et al. (2010)	Seem anomalous wrt other data	NaN		1	1	1
-22.4	-40	621	10372	203	NaN	NaN	11010	25	NaN	NaN	9208.8	NaN	NaN	1790	171.5	766	2	EHOL (7-11)	ENG-111	Mangini et al. (2010)	Seem anomalous wrt other data	NaN		1	1	1
-22.4	-40	621	11692	75	NaN	NaN	11137	59	NaN	NaN	10071	NaN	NaN	1051	74.75	766	2		ENG-111	Mangini et al. (2010)	Seem anomalous wrt other data	NaN		1	1	1
-22.4	-40	621	14392	213	NaN	NaN	14135	71	NaN	NaN	12396	NaN	NaN	1755	131.25	766	2	BA (12.8-14.8)	ENG-111	Mangini et al. (2010)	Seem anomalous wrt other data	NaN		1	1	1
-22.4	-40	621	15902	310	NaN	NaN	14540	30	NaN	NaN	13244	NaN	NaN	1289	214.75	766	2	HS1 (15-17.5)	ENG-111	Mangini et al. (2010)	Seem anomalous wrt other data	NaN		1	1	1
-22.4	-40	621	16522	128	NaN	NaN	14475	25	NaN	NaN	13665	NaN	NaN	803	92.5	766	2	HS1 (15-17.5)	ENG-111	Mangini et al. (2010)	Seem anomalous wrt other data	NaN		1	1	1
-22.4	-40	621	16982	78	NaN	NaN	15108	75	NaN	NaN	13928	NaN	NaN	1166	116.25	766	2	HS1 (15-17.5)	ENG-111	Mangini et al. (2010)	Seem anomalous wrt other data	NaN		1	1	1
-22.4	-40	621	17522	145	NaN	NaN	15661	88	NaN	NaN	14453	NaN	NaN	1240	140.25	766	2	HS1 (15-17.5)	ENG-111	Mangini et al. (2010)	Seem anomalous wrt other data	NaN		1	1	1
-22.4	-40	621	17782	160	NaN	NaN	15555	30	NaN	NaN	14499	NaN	NaN	1036	99.25	766	2		ENG-111	Mangini et al. (2010)	Seem anomalous wrt other data	NaN		1	1	1
-22.4	-40	621	18002	490	NaN	NaN	15610	35	NaN	NaN	14684	NaN	NaN	916	385.25	766	2		ENG-111	Mangini et al. (2010)	Seem anomalous wrt other data	NaN		1	1	1
23.5	-111.6	705	870	300	NaN	NaN	2050	30	NaN	NaN	935	NaN	NaN	1086	274.25	1407	3	HOL (<6)	MV99-GC31	Marchitto et al. (2007)	Extreme depletions	30.597		0	0	0
23.5	-111.6	705	1540	400	NaN	NaN	2230	35	NaN	NaN	1668	NaN	NaN	550	325.25	1407	3	HOL (<6)	MV99-GC31	Marchitto et al. (2007)	Extreme depletions	31.1111		0	0	0
23.5	-111.6	705	2440	400	NaN	NaN	3030	40	NaN	NaN	2431	NaN	NaN	600	293.5	1407	3	HOL (<6)	MV99-GC31	Marchitto et al. (2007)	Extreme depletions	30.4688		0	0	0
23.5	-111.6	705	3080	400	NaN	NaN	3690	45	NaN	NaN	2955	NaN	NaN	749	317.5	1407	3	HOL (<6)	MV99-GC31	Marchitto et al. (2007)	Extreme depletions	30.8081		0	0	0
23.5	-111.6	705	4070	400	NaN	NaN	3840	50	NaN	NaN	3686	NaN	NaN	107	101.5	1407	3	HOL (<6)	MV99-GC31	Marchitto et al. (2007)	Extreme depletions	31.25		0	0	0
23.5	-111.6	705	4790	400	NaN	NaN	5130	60	NaN	NaN	4127	NaN	NaN	905	295	1407	3	HOL (<6)	MV99-GC31	Marchitto et al. (2007)	Extreme depletions	30.5556		0	0	0
23.5	-111.6	705	5690	400	NaN	NaN	5810	40	NaN	NaN	4973	NaN	NaN	820	285.75	1407	3	HOL (<6)	MV99-GC31	Marchitto et al. (2007)	Extreme depletions	30.8642		0	0	0
23.5	-111.6	705	7310	300	NaN	NaN	7190	50	NaN	NaN	6381	NaN	NaN	788	295	1407	3	EHOL (7-11)	MV99-GC31	Marchitto et al. (2007)	Extreme depletions	29.4118		0	0	0
23.5	-111.6	705	9010	300	NaN	NaN	8980	60	NaN	NaN	8092	NaN	NaN	884	222.5	1407	3	EHOL (7-11)	MV99-GC31	Marchitto et al. (2007)	Extreme depletions	28.0899		0	0	0
23.5	-111.6	705	10790	200	NaN	NaN	10050	410	NaN	NaN	9565	NaN	NaN	538	270.25	1407	3	EHOL (7-11)	MV99-GC31	Marchitto et al. (2007)	Extreme depletions	29.2683		0	0	0
23.5	-111.6	705	11610	100	NaN	NaN	11600	70	NaN	NaN	10041	NaN	NaN	1544	82.75	1407	3		MV99-GC31	Marchitto et al. (2007)	Extreme depletions	32.5		0	0	0
23.5	-111.6	705	12410	200	NaN	NaN	13500	70	NaN	NaN	10339	NaN	NaN	3072	144.25	1407	3	YD (11.8-12.7)	MV99-GC31	Marchitto et al. (2007)	Extreme depletions	30.7692		0	0	0
23.5	-111.6	705	13580	300	NaN	NaN	13650	150	NaN	NaN	11701	NaN	NaN	1912	332	1407	3	BA (12.8-14.8)	MV99-GC31	Marchitto et al. (2007)	Extreme depletions	30.279		0	0	0
23.5	-111.6	705	320	100	NaN	NaN	1720	30	NaN	NaN	326	NaN	NaN	1429	91.75	1407	3	HOL (<6)	MV99-MC19	Marchitto et al. (2007)	Extreme depletions	30.6122		0	0	0
23.5	-111.6	705	810	200	NaN	NaN	2050	35	NaN	NaN	946	NaN	NaN	1131	201.75	1407	3	HOL (<6)	MV99-MC19	Marchitto et al. (2007)	Extreme depletions	31.25		0	0	0
23.5	-111.6	705	1290	400	NaN	NaN	2320	35	NaN	NaN	1353	NaN	NaN	906	362.5	1407	3	HOL (<6)	MV99-MC19	Marchitto et al. (2007)	Extreme depletions	30.042		0	0	0
23.5	-111.6	705	10810	200	NaN	NaN	10460	30	NaN	NaN	9587	NaN	NaN	912	128.5	1407	3	EHOL (7-11)	MV99-PC08	Marchitto et al. (2007)	Extreme depletions	29.4118		0	0	0
23.5	-111.6	705	11320	200	NaN	NaN	10845	30	NaN	NaN	9945	NaN	NaN	900	145	1407	3		MV99-PC08	Marchitto et al. (2007)	Extreme depletions	31.25		0	0	0
23.5	-111.6	705	12120	200	NaN	NaN	13380	35	NaN	NaN	10360	NaN	NaN	3035	103	1407	3	YD (11.8-12.7)	MV99-PC08	Marchitto et al. (2007)	Extreme depletions	32.8947		0	0	0
23.5	-111.6	705	12880	100	NaN	NaN	13530	30	NaN	NaN	10965	NaN	NaN	2543	96	1407	3	BA (12.8-14.8)	MV99-PC08	Marchitto et al. (2007)	Extreme depletions	28.9855		0	0	0
23.5	-111.6	705	13570	100	NaN	NaN	13420	25	NaN	NaN	11663	NaN	NaN	1686	104	1407	3	BA (12.8-14.8)	MV99-PC08	Marchitto et al. (2007)	Extreme depletions	29.7297		0	0	0
23.5	-111.6	705	13940	100	NaN	NaN	14285	35	NaN	NaN	12020	NaN	NaN	2243	107	1407	3	BA (12.8-14.8)	MV99-PC08	Marchitto et al. (2007)	Extreme depletions	34.6154		0	0	0
23.5	-111.6	705	14200	200	NaN	NaN	13370	30	NaN	NaN	12302	NaN	NaN	1076	131.5	1407	3	BA (12.8-14.8)	MV99-PC08	Marchitto et al. (2007)	Extreme depletions	38.2353		0	0	0
23.5	-111.6	705	14370	200	NaN	NaN	14485	35	NaN	NaN	12398	NaN	NaN	2106	101	1407	3	BA (12.8-14.8)	MV99-PC08	Marchitto et al. (2007)	Extreme depletions	35.7143		0	0	0
23.5	-111.6	705	14650	100	NaN	NaN	15755	40	NaN	NaN	12480	NaN	NaN	3308	63.25	1407	3	BA (12.8-14.8)	MV99-PC08	Marchitto et al. (2007)	Extreme depletions	29.0323		0	0	0
23.5	-111.6	705	14960	200	NaN	NaN	15850	40	NaN	NaN	12553	NaN	NaN	3288	138	1407	3		MV99-PC08	Marchitto et al. (2007)	Extreme depletions	27.9412		0	0	0
23.5	-111.6	705	15300	300	NaN	NaN	16505	40	NaN	NaN	12836	NaN	NaN	3671	211	1407	3	HS1 (15-17.5)	MV99-PC08	Marchitto et al. (2007)	Extreme depletions	28.3784		0	0	0
23.5	-111.6	705	15670	300	NaN	NaN	16785	45	NaN	NaN	13074	NaN	NaN	3706	215	1407	3	HS1 (15-17.5)	MV99-PC08	Marchitto et al. (2007)	Extreme depletions	28.5714		0	0	0
23.5	-111.6	705	16020	300	NaN	NaN	16665	40	NaN	NaN	13326	NaN	NaN	3334	213	1407	3	HS1 (15-17.5)	MV99-PC08	Marchitto et al. (2007)	Extreme depletions	28.5714		0	0	0
23.5	-111.6	705	16370	300	NaN	NaN	16425	45	NaN	NaN	13581	NaN	NaN	2848	197.75	1407	3	HS1 (15-17.5)	MV99-PC08	Marchitto et al. (2007)	Extreme depletions	27.7778		0	0	0
23.5	-111.6	705	16730	300	NaN	NaN	16390	40	NaN	NaN	13804	NaN	NaN	2589	214	1407	3	HS1 (15-17.5)	MV99-PC08	Marchitto et al. (2007)	Extreme depletions	28.5714		0	0	0
23.5	-111.6	705	17080	300	NaN	NaN	16425	50	NaN	NaN	14080	NaN	NaN	2359	219.25	1407	3	HS1 (15-17.5)	MV99-PC08	Marchitto et al. (2007)	Extreme depletions	28.5714		0	0	0
23.5	-111.6	705	17430	300	NaN	NaN	16185	45	NaN	NaN	14377	NaN	NaN	1816	219.75	1407	3	HS1 (15-17.5)	MV99-PC08	Marchitto et al. (2007)	Extreme depletions	28.5714		0	0	0
23.5	-111.6	705	17780	300	NaN	NaN	16235	40	NaN	NaN	14497	NaN	NaN	1706	206.25	1407	3	HS1 (15-17.5)	MV99-PC08	Marchitto et al. (2007)	Extreme depletions	30.8824		0	0	0
23.5	-111.6	705	18120	300	NaN	NaN	16810	40	NaN	NaN	14729	NaN	NaN	2051	243.5	1407	3		MV99-PC08	Marchitto et al. (2007)	Extreme depletions	31.0345		0	0	0
23.5	-111.6	705	18410	300	NaN	NaN	16680	40	NaN	NaN	15242	NaN	NaN	1519	308	1407	3		MV99-PC08	Marchitto et al. (2007)	Extreme depletions	31.3187		0	0	0
23.5	-111.6	705	21140	200	NaN	NaN	19720	60	NaN	NaN	17543	NaN	NaN	2185	174.75	1407	3	LGM (19-21.8)	MV99-PC08	Marchitto et al. (2007)	Extreme depletions	31.746		0	0	0
23.5	-111.6	705	21770	300	NaN	NaN	19640	60	NaN	NaN	17853	NaN	NaN	1760	224.5	1407	3	LGM (19-21.8)	MV99-PC08	Marchitto et al. (2007)	Extreme depletions	31.129		0	0	0
23.5	-111.6	705	22390	300	NaN	NaN	19650	80	NaN	NaN	18470	NaN	NaN	1158	298.75	1407	3		MV99-PC08	Marchitto et al. (2007)	Extreme depletions	31.4423		0	0	0
23.5	-111.6	705	23430	100	NaN	NaN	21170	70	NaN	NaN	19539	NaN	NaN	1676	110.5	1407	3		MV99-PC08	Marchitto et al. (2007)	Extreme depletions	26.1628		0	0	0
23.5	-111.6	705	25150	300	NaN	NaN	22260	70	NaN	NaN	20840	NaN	NaN	1400	243	1407	3	preLGM (25-30)	MV99-PC08	Marchitto et al. (2007)	Extreme depletions	25.3247		0	0	0
23.5	-111.6	705	29000	200	NaN	NaN	25500	170	NaN	NaN	24723	NaN	NaN	745	297.75	1407	3	preLGM (25-30)	MV99-PC08	Marchitto et al. (2007)	Extreme depletions	26.0116		0	0	0
23.5	-111.6	705	30730	200	NaN	NaN	27200	130	NaN	NaN	26326	NaN	NaN	804	244.75	1407	3		MV99-PC08	Marchitto et al. (2007)	Extreme depletions	29.4118		0	0	0
23.5	-111.6	705	33110	200	NaN	NaN	29230	160	NaN	NaN	28686	NaN	NaN	532	248.5	1407	3		MV99-PC08	Marchitto et al. (2007)	Extreme depletions	24.3056		0	0	0
23.5	-111.6	705	34550	200	NaN	NaN	30830	170	NaN	NaN	30172	NaN	NaN	642	345	1407	3		MV99-PC08	Marchitto et al. (2007)	Extreme depletions	26.7857		0	0	0
23.5	-111.6	705	35110	200	NaN	NaN	30915	190	NaN	NaN	30630	NaN	NaN	208	80.5	1407	3		MV99-PC08	Marchitto et al. (2007)	Extreme depletions	25.641		0	0	0
23.5	-111.6	705	35890	200	NaN	NaN	31475	280	NaN	NaN	31448	NaN	NaN	13	-17.25	1407	3		MV99-PC08	Marchitto et al. (2007)	Extreme depletions	24.6305		0	0	0
23.5	-111.6	705	37920	200	NaN	NaN	34400	260	NaN	NaN	33355	NaN	NaN	1059	283.25	1407	3		MV99-PC08	Marchitto et al. (2007)	Extreme depletions	28.7711		0	0	0
49.3667	152.883	1765	9650	71	9630	50	10450	70	820	86	8693	937	50	1736	99.25	2081	3	EHOL (7-11)	LV29-114-3	Max et al. (2014)		20.4145		1	1	1
49.3667	152.883	1765	10833	86	10465	50	11200	75	735	90	9598.4	866.6	50	1630	93	2081	3	EHOL (7-11)	LV29-114-3	Max et al. (2014)		21.416		1	1	1
49.3667	152.883	1765	13113	54	12290	55	12900	85	610	101	11220	1070	55	1703	124.25	2081	3	BA (12.8-14.8)	LV29-114-3	Max et al. (2014)		20.7428		1	1	1
49.3667	152.883	1765	14147	89	13180	60	14000	95	820	112	12259	921	60	1748	130.75	2081	3	BA (12.8-14.8)	LV29-114-3	Max et al. (2014)		20.6404		1	1	1
49.3667	152.883	1765	15953	105	14400	80	14750	130	350	153	13270	1130	80	1470	149.25	2081	3	HS1 (15-17.5)	LV29-114-3	Max et al. (2014)		19.8709		1	1	1
49.3667	152.883	1765	16890	94	15130	80	16600	120	1470	144	13862	1268	80	2724	139.5	2081	3	HS1 (15-17.5)	LV29-114-3	Max et al. (2014)		20.8407		1	1	1
52.7167	144.7	713	14532	176	13390	100	13760	60	370	117	12436	954	100	1338	86.5	1656	3	BA (12.8-14.8)	SO178-13-6	Max et al. (2014)		142.616		1	1	1
52.7167	144.7	713	15985	61	14420	45	14580	60	160	75	13296	1124	45	1280	80.5	1656	3	HS1 (15-17.5)	SO178-13-6	Max et al. (2014)		140.788		1	1	1
52.7167	144.7	713	16850	73	15090	60	15470	60	380	85	13844	1246	60	1620	77.5	1656	3	HS1 (15-17.5)	SO178-13-6	Max et al. (2014)		139.021		1	1	1
58.8667	170.683	630	13653	63	12600	55	12850	95	250	110	11819	781	55	1040	112.75	1481	3	BA (12.8-14.8)	SO201-2-101KL	Max et al. (2014)	Low sed rate <2cm/kyr *	0.73244		0	1	0
58.8667	170.683	630	16918	68	14950	60	16800	130	1850	143	13878	1072	60	2911	141.5	1481	3	HS1 (15-17.5)	SO201-2-101KL	Max et al. (2014)		5.31978		1	1	1
58.8667	170.683	630	19629	147	17310	120	18630	200	1320	233	16358	952	120	2340	238.75	1481	3	LGM (19-21.8)	SO201-2-101KL	Max et al. (2014)		5.60395		1	1	1
53.9833	162.367	2145	11266	83	10800	65	11750	50	950	82	9903.2	896.8	65	1863	116.25	2140	3		SO201-2-12KL	Max et al. (2014)		30.1793		1	1	1
53.9833	162.367	2145	13321	55	12500	50	13500	55	1000	74	11466	1034	50	2047	84.25	2140	3	BA (12.8-14.8)	SO201-2-12KL	Max et al. (2014)		38.1353		1	1	1
53.9833	162.367	2145	13771	74	12900	50	13850	50	950	71	11889	1011	50	1949	96	2140	3	BA (12.8-14.8)	SO201-2-12KL	Max et al. (2014)		39.939		1	1	1
53.9833	162.367	2145	15291	74	13900	55	15300	95	1400	110	12826	1074	55	2476	116.5	2140	3	HS1 (15-17.5)	SO201-2-12KL	Max et al. (2014)		45.4516		1	1	1
56.3167	170.683	2135	11115	41	10450	40	11650	45	1200	60	9658	792	40	2005	67	2175	3		SO201-2-77KL	Max et al. (2014)		10.3464		1	1	1
56.3167	170.683	2135	12579	45	11500	50	13000	70	1500	86	10473	1027	50	2481	84.75	2175	3	YD (11.8-12.7)	SO201-2-77KL	Max et al. (2014)		12.3221		1	1	1
56.3167	170.683	2135	14567	101	13200	45	14450	85	1250	96	12453	747	45	2010	93.5	2175	3	BA (12.8-14.8)	SO201-2-77KL	Max et al. (2014)		12.3567		1	1	1
57.5	170.4	968	11110	70	10450	55	11250	110	800	123	9653	797	55	1606	135.5	1811	3		SO201-2-85KL	Max et al. (2014)		3.87039		1	1	1
57.5	170.4	968	15489	105	13850	80	14050	80	200	113	12931	919	80	1106	109	1811	3	HS1 (15-17.5)	SO201-2-85KL	Max et al. (2014)		6.00426		1	1	1
57.5	170.4	968	19674	80	17350	65	19210	90	1860	111	16384	966	65	2862	115.75	1811	3	LGM (19-21.8)	SO201-2-85KL	Max et al. (2014)		6.86185		1	1	1
60.1167	-179.433	1100	11657	40	10850	25	11300	50	450	56	10097	753	25	1231	58.25	1971	3		SO202-18-6	Max et al. (2014)		35.6009		1	1	1
60.1167	-179.433	1100	11802	81	10950	55	11550	60	600	81	10121	829	55	1395	83.75	1971	3	YD (11.8-12.7)	SO202-18-6	Max et al. (2014)		36.604		1	1	1
60.1167	-179.433	1100	12116.5	111	11150	65	11800	60	650	88	10368	782	65	1451	77.5	1971	3	YD (11.8-12.7)	SO202-18-6	Max et al. (2014)		42.2564		1	1	1
60.1167	-179.433	1100	12866	63	11850	60	12300	80	450	100	10969	881	60	1328	102.75	1971	3	BA (12.8-14.8)	SO202-18-6	Max et al. (2014)		46.0127		1	1	1
48.91	-126.9	920	10013	97	9760	70	10680	54.0833	920	88	8895.4	864.6	70	1796.17	75.25	1726	3	EHOL (7-11)	JT96-09	McKay et al. (2005)		4.74383		1	1	1
48.91	-126.9	920	12463	134	11500	110	12110	80	610	136	10403	1097	110	1663	128	1726	3	YD (11.8-12.7)	JT96-09	McKay et al. (2005)		7.02078		1	1	1
48.91	-126.9	920	13079	122	12460	120	13170	100	710	156	11098	1362	120	2019	166.75	1726	3	BA (12.8-14.8)	JT96-09	McKay et al. (2005)		8.60158		1	1	1
48.91	-126.9	920	13259	87	12640	90	13500	80	860	120	11396	1244	90	2115	130.25	1726	3	BA (12.8-14.8)	JT96-09	McKay et al. (2005)		10.7474		1	1	1
48.91	-126.9	920	14205	131	13410	80	14290	110	880	136	12305	1105	80	2000	151.75	1726	3	BA (12.8-14.8)	JT96-09	McKay et al. (2005)		18.409		1	1	1
48.91	-126.9	920	14398	146	13520	70	14350	120	830	139	12396	1124	70	1963	136.25	1726	3	BA (12.8-14.8)	JT96-09	McKay et al. (2005)		19.8986		1	1	1
48.91	-126.9	920	15345	92	14140	70	14830	280	690	289	12878	1262	70	1969	283.75	1726	3	HS1 (15-17.5)	JT96-09	McKay et al. (2005)		22.5806		1	1	1
48.9	-126.9	920	10430	200	9760	70	10680	90	920	114	9252	508	70	1423	197.75	1726	3	EHOL (7-11)	JT96-09PC	McKay et al. (2005)		4.95652		1	1	1
48.9	-126.9	920	10555.5	379.75	9360	240	10910	70	1550	250	9319.7	40.3	240	1553	271.25	1726	3	EHOL (7-11)	JT96-09PC	McKay et al. (2005)		41.0256		1	1	1
48.9	-126.9	920	11425	348.5	11500	110	12110	80	610	136	10037	1463	110	2122	232.25	1726	3		JT96-09PC	McKay et al. (2005)		34.0909		1	1	1
48.9	-126.9	920	12115	324.75	12460	120	13170	100	710	156	10371	2089	120	2841	208.5	1726	3	YD (11.8-12.7)	JT96-09PC	McKay et al. (2005)		50.4626		1	1	1
48.9	-126.9	920	12709.5	316.625	12640	90	13500	80	860	120	10676	1964	90	2761	303.75	1726	3		JT96-09PC	McKay et al. (2005)		67.9694		1	1	1
48.9	-126.9	920	14468	311.625	13410	80	14290	110	880	136	12409	1001	80	1897	196.5	1726	3	BA (12.8-14.8)	JT96-09PC	McKay et al. (2005)		78.6163		1	1	1
48.9	-126.9	920	14786	321.75	13520	70	14350	120	830	139	12391	1129	70	1853	204.75	1726	3		JT96-09PC	McKay et al. (2005)		72.6392		1	1	1
48.9	-126.9	920	15612	366	14140	70	14830	280	690	289	13023	1117	70	1786	374.25	1726	3	HS1 (15-17.5)	JT96-09PC	McKay et al. (2005)		72.6392		1	1	1
40.4	143.5	2215	76.2533	29.9123	NaN	NaN	2280	40	NaN	NaN	129.75	NaN	NaN	2158	43.25	2131	3	HOL (<6)	KR02-15-PC6	Minoshima et al. (2007)		74.7508		1	1	1
40.4	143.5	2215	593.973	63.2642	NaN	NaN	2720	50	NaN	NaN	607.13	NaN	NaN	2109	121	2131	3	HOL (<6)	KR02-15-PC6	Minoshima et al. (2007)		74.7508		1	1	1
40.4	143.5	2215	1292.29	108.25	NaN	NaN	3400	50	NaN	NaN	1362.2	NaN	NaN	2027	129.5	2131	3	HOL (<6)	KR02-15-PC6	Minoshima et al. (2007)		99.2352		1	1	1
40.4	143.5	2215	2300	200	NaN	NaN	4170	30	NaN	NaN	2211	NaN	NaN	1911	143.25	2131	3	HOL (<6)	KR02-15-PC6	Minoshima et al. (2007)		132.5		1	1	1
40.4	143.5	2215	2660	200	NaN	NaN	4470	40	NaN	NaN	2446	NaN	NaN	1955	18	2131	3	HOL (<6)	KR02-15-PC6	Minoshima et al. (2007)		41.6326		1	1	1
40.4	143.5	2215	3640	200	NaN	NaN	5270	50	NaN	NaN	3405	NaN	NaN	1865	173.75	2131	3	HOL (<6)	KR02-15-PC6	Minoshima et al. (2007)		51.931		1	1	1
40.4	143.5	2215	4816	335.25	5170	60	6650	50	1480	78	4172	998	60	2406	244	2131	3	HOL (<6)	KR02-15-PC6	Minoshima et al. (2007)		36.3706		1	1	1
40.4	143.5	2215	5047	86	5170	60	6650	50	1480	78	4458.6	711.4	60	2194	72.25	2131	3	HOL (<6)	KR02-15-PC6	Minoshima et al. (2007)		71.3295		1	1	1
40.4	143.5	2215	6372.2	325.85	NaN	NaN	7610	10	NaN	NaN	5574.8	NaN	NaN	2004	23	2131	3		KR02-15-PC6	Minoshima et al. (2007)		36.2076		1	1	1
40.4	143.5	2215	7154	94	7070	90	8530	60	1460	108	6171	899	90	2299	103	2131	3	EHOL (7-11)	KR02-15-PC6	Minoshima et al. (2007)		63.0696		1	1	1
40.4	143.5	2215	7327.8	255.5	7070	90	8530	60	1460	108	6428.4	641.6	90	2114	261	2131	3	EHOL (7-11)	KR02-15-PC6	Minoshima et al. (2007)		29.655		1	1	1
40.4	143.5	2215	8062	59	8010	60	9040	80	1030	100	7322.4	687.6	60	1761	104.5	2131	3	EHOL (7-11)	KR02-15-PC6	Minoshima et al. (2007)		59.613		1	1	1
40.4	143.5	2215	8319.2	297.45	8010	60	9040	80	1030	100	7451.7	558.3	60	1528	288	2131	3	EHOL (7-11)	KR02-15-PC6	Minoshima et al. (2007)		19.0644		1	1	1
40.4	143.5	2215	11387	123	10610	90	11840	60	1230	108	9949	661	90	1860	118	2131	3		KR02-15-PC6	Minoshima et al. (2007)		47.3522		1	1	1
40.4	143.5	2215	11393	300.2	10610	90	11840	60	1230	108	9968.2	641.8	90	1862	202.75	2131	3		KR02-15-PC6	Minoshima et al. (2007)		20.0352		1	1	1
40.4	143.5	2215	11771	111	10860	70	12490	110	1630	130	10149	711	70	2353	130	2131	3	YD (11.8-12.7)	KR02-15-PC6	Minoshima et al. (2007)		47.1583		1	1	1
40.4	143.5	2215	11847.2	301.35	NaN	NaN	12100	60	NaN	NaN	10205	NaN	NaN	1907	153.75	2131	3	YD (11.8-12.7)	KR02-15-PC6	Minoshima et al. (2007)		19.5402		1	1	1
40.4	143.5	2215	12195.2	299.425	10860	70	12490	110	1630	130	10391	469	70	2131	213.25	2131	3	YD (11.8-12.7)	KR02-15-PC6	Minoshima et al. (2007)		12.5207		1	1	1
40.4	143.5	2215	12738.3	379.2	NaN	NaN	13590	80	NaN	NaN	10776	NaN	NaN	2768	349.75	2131	3		KR02-15-PC6	Minoshima et al. (2007)		11.4171		1	1	1
40.4	143.5	2215	13333.9	418.35	NaN	NaN	14050	80	NaN	NaN	11480	NaN	NaN	2562	57.5	2131	3	BA (12.8-14.8)	KR02-15-PC6	Minoshima et al. (2007)		11.9563		1	1	1
40.4	143.5	2215	13911	407.25	13470	70	14500	120	1030	139	12061	1409	70	2458	334.5	2131	3	BA (12.8-14.8)	KR02-15-PC6	Minoshima et al. (2007)		22.5207		1	1	1
40.4	143.5	2215	14395	405.25	13530	70	14890	70	1360	99	12396	1134	70	2517	252.75	2131	3	BA (12.8-14.8)	KR02-15-PC6	Minoshima et al. (2007)		4.93506		1	1	1
40.4	143.5	2215	15088	87	13470	70	14500	120	1030	139	12648	822	70	1843	140	2131	3	HS1 (15-17.5)	KR02-15-PC6	Minoshima et al. (2007)		38.1495		1	1	1
40.4	143.5	2215	15164	89	13530	70	14890	70	1360	99	12718	812	70	2173	105.75	2131	3	HS1 (15-17.5)	KR02-15-PC6	Minoshima et al. (2007)		38.6771		1	1	1
40.4	143.5	2215	18630	200	12900	700	17160	90	4260	706	15210	-2310	700	1878	229	2131	3		KR02-15-PC6	Minoshima et al. (2007)		11.4957		1	1	1
40.4	143.5	2215	25650	200	NaN	NaN	23100	60	NaN	NaN	21219	NaN	NaN	1857	250.25	2131	3	preLGM (25-30)	KR02-15-PC6	Minoshima et al. (2007)		40.3846		1	1	1
40.4	143.5	2215	26950	200	NaN	NaN	24230	70	NaN	NaN	22506	NaN	NaN	1700	233.75	2131	3	preLGM (25-30)	KR02-15-PC6	Minoshima et al. (2007)		40.3846		1	1	1
43.05	-30.0333	3080	2084	200	3097	55	2783	56	-314	78	2109	988	55	662	172.75	715	1	HOL (<6)	SU90-08	Missiaen et al. (2020) in Radiocarbon	Bioturbation issues, Low sed rate <2cm/kyr, negative B-P	1.43954		0	0	0
43.05	-30.0333	3080	2084	200	NaN	NaN	3302	58	NaN	NaN	2109	NaN	NaN	1181	173.5	715	1	HOL (<6)	SU90-08	Missiaen et al. (2020) in Radiocarbon	Bioturbation issues	4.87805		0	0	0
43.05	-30.0333	3080	2084	200	3407	61	3460	31	53	68	2109	1298	61	1339	127	715	1	HOL (<6)	SU90-08	Missiaen et al. (2020) in Radiocarbon	Bioturbation issues, Low sed rate <2cm/kyr	1.43954		0	0	0
43.05	-30.0333	3080	2494	200	NaN	NaN	3289	22	NaN	NaN	2464	NaN	NaN	837	126.75	715	1	HOL (<6)	SU90-08	Missiaen et al. (2020) in Radiocarbon	Bioturbation issues	4.88998		0	0	0
43.05	-30.0333	3080	3312	200	3319	56	2763	69	-556	89	3044	275	56	-335	174.25	715	1	HOL (<6)	SU90-08	Missiaen et al. (2020) in Radiocarbon	Bioturbation issues, negative B-Atm, negative B-P	4.88599		0	0	0
43.05	-30.0333	3080	3312	200	3564	60	3059	34	-505	69	3044	520	60	-31	162.75	715	1	HOL (<6)	SU90-08	Missiaen et al. (2020) in Radiocarbon	Bioturbation issues, negative B-Atm, negative B-P	4.88998		0	0	0
43.05	-30.0333	3080	4540	200	NaN	NaN	4215	35	NaN	NaN	4090	NaN	NaN	144	127.75	715	1	HOL (<6)	SU90-08	Missiaen et al. (2020) in Radiocarbon	Bioturbation issues	4.77327		0	0	0
43.05	-30.0333	3080	4959	200	4760	62	4342	64	-418	89	4381	379	62	-55	157	715	1	HOL (<6)	SU90-08	Missiaen et al. (2020) in Radiocarbon	Bioturbation issues, negative B-Atm, negative B-P	4.77327		0	0	0
43.05	-30.0333	3080	4959	200	4558	61	4391	24	-167	66	4381	177	61	-11	128.5	715	1	HOL (<6)	SU90-08	Missiaen et al. (2020) in Radiocarbon	Bioturbation issues, negative B-Atm, negative B-P	4.77327		0	0	0
43.05	-30.0333	3080	4959	200	NaN	NaN	4842	64	NaN	NaN	4381	NaN	NaN	445	157	715	1	HOL (<6)	SU90-08	Missiaen et al. (2020) in Radiocarbon	Bioturbation issues	3.57569		0	0	0
43.05	-30.0333	3080	6637	200	6520	70	5373	64	-1147	95	5809.8	710.2	70	-456	189.75	715	1		SU90-08	Missiaen et al. (2020) in Radiocarbon	Bioturbation issues, negative B-Atm, negative B-P	3.57569		0	0	0
43.05	-30.0333	3080	6637	200	5845	69	5954	29	109	75	5809.8	35.2	69	132	5.25	715	1		SU90-08	Missiaen et al. (2020) in Radiocarbon	Bioturbation issues	3.57569		0	0	0
43.05	-30.0333	3080	6637	200	NaN	NaN	6651	69	NaN	NaN	5809.8	NaN	NaN	821	191.25	715	1		SU90-08	Missiaen et al. (2020) in Radiocarbon	Bioturbation issues	3.38409		0	0	0
43.05	-30.0333	3080	7228	200	NaN	NaN	6245	28	NaN	NaN	6256.4	NaN	NaN	-63	184.5	715	1	EHOL (7-11)	SU90-08	Missiaen et al. (2020) in Radiocarbon	Bioturbation issues, negative B-Atm	3.37724		0	0	0
43.05	-30.0333	3080	10189	200	9372	89	8668	32	-704	95	8983.4	388.6	89	-326	150.25	715	1	EHOL (7-11)	SU90-08	Missiaen et al. (2020) in Radiocarbon	Bioturbation issues, negative B-Atm, negative B-P	3.37724		0	0	0
43.05	-30.0333	3080	10189	200	9320	82	8703	86	-617	119	8983.4	336.6	82	-314	175.75	715	1	EHOL (7-11)	SU90-08	Missiaen et al. (2020) in Radiocarbon	Bioturbation issues, negative B-Atm, negative B-P	3.37724		0	0	0
43.05	-30.0333	3080	10189	200	NaN	NaN	9067	88	NaN	NaN	8983.4	NaN	NaN	50	176.75	715	1	EHOL (7-11)	SU90-08	Missiaen et al. (2020) in Radiocarbon	Bioturbation issues	4.03633		0	0	0
43.05	-30.0333	3080	11180	200	NaN	NaN	9636	83	NaN	NaN	9708	NaN	NaN	-110	173	715	1	EHOL (7-11)	SU90-08	Missiaen et al. (2020) in Radiocarbon	Bioturbation issues, negative B-Atm	4.1841		0	0	0
43.05	-30.0333	3080	11180	200	10340	40	10226	85	-114	94	9708	632	40	480	174.25	715	1	EHOL (7-11)	SU90-08	Missiaen et al. (2020) in Radiocarbon	Bioturbation issues, negative B-P	4.03633		0	0	0
43.05	-30.0333	3080	11658	200	11501	94	10412	86	-1089	127	10097	1404	94	327	137.75	715	1	YD (11.8-12.7)	SU90-08	Missiaen et al. (2020) in Radiocarbon	Bioturbation issues, negative B-P	4.1841		0	0	0
43.05	-30.0333	3080	11658	200	NaN	NaN	10669	37	NaN	NaN	10097	NaN	NaN	592	113	715	1	YD (11.8-12.7)	SU90-08	Missiaen et al. (2020) in Radiocarbon	Bioturbation issues	5.88235		0	0	0
43.05	-30.0333	3080	11658	200	NaN	NaN	10841	84	NaN	NaN	10097	NaN	NaN	757	136.75	715	1	YD (11.8-12.7)	SU90-08	Missiaen et al. (2020) in Radiocarbon	Bioturbation issues	4.1841		0	0	0
43.05	-30.0333	3080	12338	200	11749	97	11285	96	-464	136	10423	1326	97	880	148	715	1	YD (11.8-12.7)	SU90-08	Missiaen et al. (2020) in Radiocarbon	Bioturbation issues, negative B-P	5.88235		0	0	0
43.05	-30.0333	3080	12338	200	11482	94	11293	92	-189	132	10423	1059	94	889	145.25	715	1	YD (11.8-12.7)	SU90-08	Missiaen et al. (2020) in Radiocarbon	Bioturbation issues, negative B-P	5.88235		0	0	0
43.05	-30.0333	3080	12338	200	NaN	NaN	11575	45	NaN	NaN	10423	NaN	NaN	1179	118.5	715	1	YD (11.8-12.7)	SU90-08	Missiaen et al. (2020) in Radiocarbon	Bioturbation issues	6.32911		0	0	0
43.05	-30.0333	3080	13128	200	11811	96	11807	98	-4	137	11256	555	96	579	240	715	1	BA (12.8-14.8)	SU90-08	Missiaen et al. (2020) in Radiocarbon	Bioturbation issues, negative B-P	6.32911		0	0	0
43.05	-30.0333	3080	13128	200	11913	95	11899	93	-14	133	11256	657	95	671	237.75	715	1	BA (12.8-14.8)	SU90-08	Missiaen et al. (2020) in Radiocarbon	Bioturbation issues, negative B-P	6.32911		0	0	0
43.05	-30.0333	3080	13128	200	NaN	NaN	11938	44	NaN	NaN	11256	NaN	NaN	702	220.75	715	1	BA (12.8-14.8)	SU90-08	Missiaen et al. (2020) in Radiocarbon	Bioturbation issues	7.16846		0	0	0
43.05	-30.0333	3080	13407	200	12460	109	11559	96	-901	145	11521	939	109	13	240	715	1	BA (12.8-14.8)	SU90-08	Missiaen et al. (2020) in Radiocarbon	Bioturbation issues, negative B-P	7.16846		0	0	0
43.05	-30.0333	3080	13407	200	12675	96	12261	97	-414	136	11521	1154	96	715	240.25	715	1	BA (12.8-14.8)	SU90-08	Missiaen et al. (2020) in Radiocarbon	Bioturbation issues, negative B-P	7.8329		0	0	0
43.05	-30.0333	3080	13790	200	12563	105	11632	91	-931	139	11918	645	105	-300	207.5	715	1	BA (12.8-14.8)	SU90-08	Missiaen et al. (2020) in Radiocarbon	Bioturbation issues, negative B-Atm, negative B-P	7.8329		0	0	0
43.05	-30.0333	3080	13790	200	12154	45	11898	98	-256	108	11918	236	45	-33	210.25	715	1	BA (12.8-14.8)	SU90-08	Missiaen et al. (2020) in Radiocarbon	Bioturbation issues, negative B-Atm, negative B-P	9.31677		0	0	0
43.05	-30.0333	3080	14434	200	13548	113	13110	104	-438	154	12400	1148	113	718	137	715	1	BA (12.8-14.8)	SU90-08	Missiaen et al. (2020) in Radiocarbon	Bioturbation issues, negative B-P	9.31677		0	0	0
43.05	-30.0333	3080	14434	200	13782	105	13163	107	-619	150	12400	1382	105	771	139.25	715	1	BA (12.8-14.8)	SU90-08	Missiaen et al. (2020) in Radiocarbon	Bioturbation issues, negative B-P	13.1703		0	0	0
43.05	-30.0333	3080	15497	200	NaN	NaN	16627	155	NaN	NaN	12934	NaN	NaN	3671	208.75	715	1	HS1 (15-17.5)	SU90-08	Missiaen et al. (2020) in Radiocarbon	Bioturbation issues	5.61798		0	0	0
43.05	-30.0333	3080	15497	200	NaN	NaN	16805	158	NaN	NaN	12934	NaN	NaN	3849	210.75	715	1	HS1 (15-17.5)	SU90-08	Missiaen et al. (2020) in Radiocarbon	Bioturbation issues	13.1703		0	0	0
43.05	-30.0333	3080	16209	200	NaN	NaN	16467	143	NaN	NaN	13443	NaN	NaN	3011	198.25	715	1	HS1 (15-17.5)	SU90-08	Missiaen et al. (2020) in Radiocarbon	Bioturbation issues	4.70588		0	0	0
43.05	-30.0333	3080	16634	200	NaN	NaN	17302	159	NaN	NaN	13751	NaN	NaN	3561	202.5	715	1	HS1 (15-17.5)	SU90-08	Missiaen et al. (2020) in Radiocarbon	Bioturbation issues	4.36681		0	0	0
43.05	-30.0333	3080	16634	200	16677	56	17915	159	1238	169	13751	2926	56	4174	202.5	715	1	HS1 (15-17.5)	SU90-08	Missiaen et al. (2020) in Radiocarbon	Bioturbation issues	4.70588		0	0	0
43.05	-30.0333	3080	17550	200	17400	156	18515	168	1115	229	14461	2939	156	4096	215.25	715	1	HS1 (15-17.5)	SU90-08	Missiaen et al. (2020) in Radiocarbon	Bioturbation issues	4.30107		0	0	0
43.05	-30.0333	3080	18945	200	18432	164	19143	183	711	246	15712	2720	164	3456	286.25	715	1	LGM (19-21.8)	SU90-08	Missiaen et al. (2020) in Radiocarbon	Bioturbation issues	4.8216		0	0	0
43.05	-30.0333	3080	18945	200	18515	168	19470	182	955	248	15712	2803	168	3783	285.75	715	1	LGM (19-21.8)	SU90-08	Missiaen et al. (2020) in Radiocarbon	Bioturbation issues	4.30107		0	0	0
43.05	-30.0333	3080	19982	200	18884	167	19692	187	808	251	16559	2325	167	3146	239.25	715	1	LGM (19-21.8)	SU90-08	Missiaen et al. (2020) in Radiocarbon	Bioturbation issues	5.0537		0	0	0
43.05	-30.0333	3080	19982	200	18972	172	19856	187	884	254	16559	2413	172	3310	239.25	715	1	LGM (19-21.8)	SU90-08	Missiaen et al. (2020) in Radiocarbon	Bioturbation issues	4.8216		0	0	0
43.05	-30.0333	3080	21565	200	19467	198	20663	202	1196	283	17807	1660	198	2883	231.75	715	1	LGM (19-21.8)	SU90-08	Missiaen et al. (2020) in Radiocarbon	Bioturbation issues	6.50289		0	0	0
43.05	-30.0333	3080	22949	200	20322	73	21117	214	795	226	18978	1344	73	2098	304.25	715	1		SU90-08	Missiaen et al. (2020) in Radiocarbon	Bioturbation issues	10.582		0	0	0
43.05	-30.0333	3080	23327	200	20823	213	21268	216	445	303	19401	1422	213	1865	270.25	715	1		SU90-08	Missiaen et al. (2020) in Radiocarbon	Bioturbation issues	10.8696		0	0	0
43.05	-30.0333	3080	23511	200	20954	218	21595	224	641	313	19558	1396	218	2096	276.25	715	1		SU90-08	Missiaen et al. (2020) in Radiocarbon	Bioturbation issues	15.8416		0	0	0
43.05	-30.0333	3080	24016	200	21429	85	22738	247	1309	261	20026	1403	85	2723	333.5	715	1		SU90-08	Missiaen et al. (2020) in Radiocarbon	Bioturbation issues	7.23327		0	0	0
43.05	-30.0333	3080	24569	200	21793	224	23072	257	1279	341	20415	1378	224	2633	287.5	715	1		SU90-08	Missiaen et al. (2020) in Radiocarbon	Bioturbation issues	5.89102		0	0	0
43.05	-30.0333	3080	24569	200	22454	249	23207	258	753	359	20415	2039	249	2768	288.5	715	1		SU90-08	Missiaen et al. (2020) in Radiocarbon	Bioturbation issues	7.23327		0	0	0
43.05	-30.0333	3080	25248	200	23044	260	21097	220	-1947	341	20975	2069	260	141	280	715	1	preLGM (25-30)	SU90-08	Missiaen et al. (2020) in Radiocarbon	Bioturbation issues, negative B-P	5.89102		0	0	0
43.05	-30.0333	3080	25248	200	22757	245	24185	292	1428	381	20975	1782	245	3231	338	715	1	preLGM (25-30)	SU90-08	Missiaen et al. (2020) in Radiocarbon	Bioturbation issues	5.6985		0	0	0
41.68	-124.93	980	10260	149	9950	110	10810	120	860	163	9173	777	110	1702	183.5	1736	3	EHOL (7-11)	ODP1019	Mix et al. (1999)		17.0565		1	1	1
41.68	-124.93	980	10596	181	10210	120	11130	80	920	144	9413.2	796.8	120	1748	154.75	1736	3	EHOL (7-11)	ODP1019	Mix et al. (1999)		23.6882		1	1	1
41.68	-124.93	980	12308	207	11410	170	11540	90	130	192	10370	1040	170	1145	142.5	1736	3	YD (11.8-12.7)	ODP1019	Mix et al. (1999)		22.3432		1	1	1
41.68	-124.93	980	12535	158	11580	140	13290	220	1710	261	10529	1051	140	2772	271.25	1736	3	YD (11.8-12.7)	ODP1019	Mix et al. (1999)		27.1241		1	1	1
41.68	-124.93	980	12879	97	11950	110	12830	90	880	142	10964	986	110	1851	145.25	1736	3	BA (12.8-14.8)	ODP1019	Mix et al. (1999)		29.5054		1	1	1
41.68	-124.93	980	14632	203	13350	120	14260	140	910	184	12476	874	120	1819	157.25	1736	3	BA (12.8-14.8)	ODP1019	Mix et al. (1999)		32.5314		1	1	1
41.68	-124.93	980	16940	144	15080	120	16210	190	1130	225	13892	1188	120	2283	222.25	1736	3	HS1 (15-17.5)	ODP1019	Mix et al. (1999)		34.2385		1	1	1
41.68	-124.93	980	18099	165	16040	140	17480	280	1440	313	14721	1319	140	2699	338.25	1736	3		ODP1019	Mix et al. (1999)		39.3944		1	1	1
41.68	-124.93	980	21008	267	18550	210	19080	190	530	283	17470	1080	210	1653	281.5	1736	3	LGM (19-21.8)	ODP1019	Mix et al. (1999)		38.7471		1	1	1
41.68	-124.93	980	24069	329	21240	280	23860	860	2620	904	20044	1196	280	3818	898.5	1736	3		ODP1019	Mix et al. (1999)		40.467		1	1	1
42.12	-125.75	2710	10547	240	9960	230	11580	170	1620	286	9314	646	230	2234	251.75	2252	3	EHOL (7-11)	W8709A-13PC	Mix et al. (1999)		11.9702		1	1	1
42.12	-125.75	2710	11365	110	10720	70	12190	60	1470	92	9987	733	70	2220	116	2252	3		W8709A-13PC	Mix et al. (1999)		12.2305		1	1	1
42.12	-125.75	2710	12142	105	11200	60	12630	60	1430	85	10357	843	60	2272	73.25	2252	3	YD (11.8-12.7)	W8709A-13PC	Mix et al. (1999)		12.6832		1	1	1
42.12	-125.75	2710	13827	86	12760	60	14330	90	1570	108	12020	740	60	2354	124.75	2252	3	BA (12.8-14.8)	W8709A-13PC	Mix et al. (1999)		13.8497		1	1	1
42.12	-125.75	2710	14211	121	13000	90	14700	250	1700	266	12308	692	90	2411	263.25	2252	3	BA (12.8-14.8)	W8709A-13PC	Mix et al. (1999)		13.9856		1	1	1
42.12	-125.75	2710	15210	97	13700	70	14860	70	1160	99	12751	949	70	2105	110.25	2252	3	HS1 (15-17.5)	W8709A-13PC	Mix et al. (1999)		13.9711		1	1	1
42.12	-125.75	2710	15622	113	14050	140	15950	180	1900	228	13033	1017	140	2913	198.75	2252	3	HS1 (15-17.5)	W8709A-13PC	Mix et al. (1999)		14.1627		1	1	1
42.12	-125.75	2710	15785	129	14020	140	15770	320	1750	349	13166	854	140	2608	329.25	2252	3	HS1 (15-17.5)	W8709A-13PC	Mix et al. (1999)		14.1748		1	1	1
42.12	-125.75	2710	18952	123	16710	120	18360	200	1650	233	15719	991	120	2662	244	2252	3	LGM (19-21.8)	W8709A-13PC	Mix et al. (1999)		15.8954		1	1	1
42.12	-125.75	2710	19205.5	135	17030	150	18630	180	1600	234	15948	1082	150	2705	206.5	2252	3	LGM (19-21.8)	W8709A-13PC	Mix et al. (1999)		15.8158		1	1	1
42.12	-125.75	2710	24771.5	218	22000	250	23560	1020	1560	1050	20570	1430	250	2992	1011	2252	3		W8709A-13PC	Mix et al. (1999)		16.1981		1	1	1
42.12	-125.75	2710	24988	227	21910	240	24540	510	2630	564	20694	1216	240	3813	534.25	2252	3	preLGM (25-30)	W8709A-13PC	Mix et al. (1999)		16.1578		1	1	1
32.15	133.9	2700	10446	179	9800	133	11140	159	1340	207	9283	517	133	1873	221.25	2001	3	EHOL (7-11)	KT89-18-P4	Murayama et al. (1992); Okazaki et al. (2010)		17.7101		1	1	1
32.15	133.9	2700	11707	169	10692	108	12034	94	1342	143	10090	602	108	1928	130.25	2001	3	YD (11.8-12.7)	KT89-18-P4	Murayama et al. (1992); Okazaki et al. (2010)		17.0838		1	1	1
32.15	133.9	2700	12851	90	11622	101	13350	238	1728	259	10989	633	101	2405	259.25	2001	3	BA (12.8-14.8)	KT89-18-P4	Murayama et al. (1992); Okazaki et al. (2010)		18.3643		1	1	1
32.15	133.9	2700	13711	116	12450	91	14423	237	1973	254	11816	634	91	2565	259.25	2001	3	BA (12.8-14.8)	KT89-18-P4	Murayama et al. (1992); Okazaki et al. (2010)		19.5463		1	1	1
32.15	133.9	2700	15225	148	13447	113	14681	103	1234	153	12762	685	113	1912	153.25	2001	3	HS1 (15-17.5)	KT89-18-P4	Murayama et al. (1992); Okazaki et al. (2010)		22.2003		1	1	1
32.15	133.9	2700	19821	538	17275	478	19267	557	1992	734	16377	898	478	2825	704.25	2001	3	LGM (19-21.8)	KT89-18-P4	Murayama et al. (1992); Okazaki et al. (2010)		22.6527		1	1	1
32.15	133.9	2700	22645	323	19655	303	21344	205	1689	366	18774	881	303	2602	391.5	2001	3		KT89-18-P4	Murayama et al. (1992); Okazaki et al. (2010)		23.5814		1	1	1
36.07	141.82	2101	2497	46	3010	25	4560	35	1550	43	2476	534	25	2096	46.25	2096	3	HOL (<6)	MD01-2420	Okazaki et al. (2012)		28.0737		1	1	1
36.07	141.82	2101	8059	44	7880	40	9020	50	1140	64	7321.6	558.4	40	1732	73.75	2096	3	EHOL (7-11)	MD01-2420	Okazaki et al. (2012)		28.9614		1	1	1
36.07	141.82	2101	10122	53	9530	40	10800	65	1270	76	8890.2	639.8	40	1896	86	2096	3	EHOL (7-11)	MD01-2420	Okazaki et al. (2012)		29.5199		1	1	1
36.07	141.82	2101	11729	86	10700	55	12100	50	1400	74	10091	609	55	1993	74.75	2096	3	YD (11.8-12.7)	MD01-2420	Okazaki et al. (2012)		28.9198		1	1	1
36.07	141.82	2101	12427	76	11150	55	12400	65	1250	85	10356	794	55	1994	92.5	2096	3	YD (11.8-12.7)	MD01-2420	Okazaki et al. (2012)		28.4703		1	1	1
36.07	141.82	2101	12937	83	11717	88	13050	60	1333	107	11047	670	88	2027	92.25	2096	3	BA (12.8-14.8)	MD01-2420	Okazaki et al. (2012)		28.6542		1	1	1
36.07	141.82	2101	13373	52	12150	50	13450	65	1300	82	11523	627	50	1942	87.25	2096	3	BA (12.8-14.8)	MD01-2420	Okazaki et al. (2012)		28.6323		1	1	1
36.07	141.82	2101	13651	56	12400	45	13750	55	1350	71	11816	584	45	1936	79.75	2096	3	BA (12.8-14.8)	MD01-2420	Okazaki et al. (2012)		28.5767		1	1	1
36.07	141.82	2101	14972	221	13258	141	14600	60	1342	153	12566	692	141	2027	153.5	2096	3		MD01-2420	Okazaki et al. (2012)		27.0305		1	1	1
36.07	141.82	2101	15310	140	13510	113	14750	55	1240	126	12846	664	113	1913	117.5	2096	3	HS1 (15-17.5)	MD01-2420	Okazaki et al. (2012)		27.3808		1	1	1
36.07	141.82	2101	15824	69	13900	50	15250	60	1350	78	13197	703	50	2055	85.25	2096	3	HS1 (15-17.5)	MD01-2420	Okazaki et al. (2012)		27.2561		1	1	1
36.07	141.82	2101	16853	84	14696	70	15850	65	1154	96	13845	851	70	1997	86	2096	3	HS1 (15-17.5)	MD01-2420	Okazaki et al. (2012)		26.7964		1	1	1
36.07	141.82	2101	18863	145	16457	141	18000	75	1543	160	15594	863	141	2404	200.75	2096	3	LGM (19-21.8)	MD01-2420	Okazaki et al. (2012)		25.9344		1	1	1
36.07	141.82	2101	19507	56	17020	50	18350	70	1330	86	16146	874	50	2197	111.25	2096	3	LGM (19-21.8)	MD01-2420	Okazaki et al. (2012)		25.842		1	1	1
36.07	141.82	2101	22527	72	19555	60	21100	100	1545	117	18691	864	60	2417	142.25	2096	3		MD01-2420	Okazaki et al. (2012)		26.6436		1	1	1
44.53	145	1215	10716	86	10400	50	11250	55	850	74	9482.8	917.2	50	1768	92.75	2021	3	EHOL (7-11)	MR06-04 PC04A	Okazaki et al. (2014)		107.549		1	1	1
44.53	145	1215	11256	51	10800	45	11650	60	850	75	9882.4	917.6	45	1778	101.75	2021	3		MR06-04 PC04A	Okazaki et al. (2014)		106.423		1	1	1
44.53	145	1215	11480	78	10950	45	11900	60	950	75	10019	931	45	1878	69.25	2021	3		MR06-04 PC04A	Okazaki et al. (2014)		105.427		1	1	1
44.53	145	1215	13024	60	12200	60	13150	80	950	100	11061	1139	60	2078	102.75	2021	3	BA (12.8-14.8)	MR06-04 PC04A	Okazaki et al. (2014)		97.973		1	1	1
44.53	145	1215	13903	56	13000	45	13650	60	650	75	12066	934	45	1616	73.75	2021	3	BA (12.8-14.8)	MR06-04 PC04A	Okazaki et al. (2014)		93.4043		1	1	1
44.53	145	1215	18608	111	16600	95	17350	65	750	115	15162	1438	95	2127	140	2021	3		MR06-04 PC04A	Okazaki et al. (2014)		80.0892		1	1	1
51.75	-12.92	150	12590	200	11032	39	NaN	NaN	NaN	NaN	10494	538	39	482	118	396	1	YD (11.8-12.7)	MD02-2461	Peck et al., 2006		16.8065	radcal, inctcal13, cal age interpolated at 14C dates	1	1	1
51.75	-12.92	150	13304	200	12551	46	NaN	NaN	NaN	NaN	11413	1138	46	1113	219.75	396	1	BA (12.8-14.8)	MD02-2461	Peck et al., 2006		19.1691	radcal, inctcal13, cal age interpolated at 14C dates	1	1	1
51.75	-12.92	150	15182	200	11950	43	NaN	NaN	NaN	NaN	12731	-781	43	784	-150.25	396	1	HS1 (15-17.5)	MD02-2461	Peck et al., 2006	Negative radcal error, poor convergence	23.4451	radcal, intcal13, cal age interpolated at 14C dates	0	0	0
51.75	-12.92	150	16546.9	200	14530	58	NaN	NaN	NaN	NaN	13684	846	58	839	140.5	396	1	HS1 (15-17.5)	MD02-2461	Peck et al., 2006		26.7052	radcal, inctcal13, cal age interpolated at 14C dates	1	1	1
51.75	-12.92	150	17520.5	200	15118	64	NaN	NaN	NaN	NaN	14452	666	64	699	153.5	396	1	HS1 (15-17.5)	MD02-2461	Peck et al., 2006		28.3265	radcal, inctcal13, cal age interpolated at 14C dates	1	1	1
51.75	-12.92	150	19426.8	200	15518	63	NaN	NaN	NaN	NaN	16055	-537	63	558	-179	396	1	LGM (19-21.8)	MD02-2461	Peck et al., 2006	Negative radcal error, poor convergence	43.5194	radcal, intcal13, cal age interpolated at 14C dates	0	0	0
51.75	-12.92	150	20254	200	15174	60	NaN	NaN	NaN	NaN	16739	-1565	60	1573	-183	396	1	LGM (19-21.8)	MD02-2461	Peck et al., 2006	Negative radcal error, poor convergence	29.1989	radcal, intcal13, cal age interpolated at 14C dates	0	0	0
51.75	-12.92	150	20939	200	17130	77	NaN	NaN	NaN	NaN	17389	-259	77	254	-109.5	396	1	LGM (19-21.8)	MD02-2461	Peck et al., 2006	Negative radcal error, poor convergence	28.4085	radcal, intcal13, cal age interpolated at 14C dates	0	0	0
51.75	-12.92	150	21783.8	200	18233	87	NaN	NaN	NaN	NaN	17864	369	87	348	154.75	396	1	LGM (19-21.8)	MD02-2461	Peck et al., 2006		31.3253	radcal, inctcal13, cal age interpolated at 14C dates	1	1	1
51.75	-12.92	150	23108.6	200	18665	89	NaN	NaN	NaN	NaN	19257	-592	89	583	-228.25	396	1		MD02-2461	Peck et al., 2006	Negative radcal error, poor convergence	51.8659	radcal, intcal13, cal age interpolated at 14C dates	0	0	0
51.75	-12.92	150	24082.3	200	19128	94	NaN	NaN	NaN	NaN	20048	-920	94	944	-241	396	1		MD02-2461	Peck et al., 2006	Negative radcal error, poor convergence	46.3903	radcal, intcal13, cal age interpolated at 14C dates	0	0	0
51.75	-12.92	150	24987.6	200	20193	118	NaN	NaN	NaN	NaN	20694	-501	118	515	-207	396	1	preLGM (25-30)	MD02-2461	Peck et al., 2006	Negative radcal error, poor convergence	42.355	radcal, intcal13, cal age interpolated at 14C dates	0	0	0
51.75	-12.92	150	25743.2	200	20931	129	NaN	NaN	NaN	NaN	21361	-430	129	440	-274	396	1	preLGM (25-30)	MD02-2461	Peck et al., 2006	Negative radcal error, poor convergence	42.355	radcal, intcal13, cal age interpolated at 14C dates	0	0	0
57.6	-136.7	1620	13550	200	12295	30	13280	30	985	42	11701	594	30	1564	195.75	2154	3	BA (12.8-14.8)	EW0408-26JC	Praetorius et al., 2020		104.706		1	1	1
57.6	-136.7	1620	13975	160.5	12855	40	13925	50	1070	64	12004	851	40	1857	149.5	2154	3	BA (12.8-14.8)	EW0408-26JC	Praetorius et al., 2020		147.26		1	1	1
57.6	-136.7	1620	14267	143.625	13290	35	14200	40	910	53	12326	964	35	1868	109	2154	3	BA (12.8-14.8)	EW0408-26JC	Praetorius et al., 2020		202.265		1	1	1
57.6	-136.7	1620	14576	139.25	13195	30	14295	35	1100	46	12456	739	30	1860	61	2154	3	BA (12.8-14.8)	EW0408-26JC	Praetorius et al., 2020		185.535		1	1	1
57.6	-136.7	1620	14735	142.375	13230	45	14360	60	1130	75	12381	849	45	1905	90.5	2154	3	BA (12.8-14.8)	EW0408-26JC	Praetorius et al., 2020		155.258		1	1	1
57.6	-136.7	1620	15443.5	166	13840	40	14810	70	970	81	12913	927	40	1890	139.25	2154	3	HS1 (15-17.5)	EW0408-26JC	Praetorius et al., 2020		142.965		1	1	1
57.6	-136.7	1620	16772.5	206	15165	40	16540	60	1375	72	13819	1346	40	2720	160	2154	3	HS1 (15-17.5)	EW0408-26JC	Praetorius et al., 2020		217.877		1	1	1
57.6	-136.7	1620	11800	200	10330	40	12350	40	2020	57	10119	211	40	2194	110	2154	3	YD (11.8-12.7)	EW0408-26TC	Praetorius et al., 2020		19.4805		1	1	1
58.8	-144.5	3680	1529	11.5	1640	15	3130	60	1490	62	1626	14	15	1496	67.25	2095	3	HOL (<6)	EW0408-87JC	Praetorius et al., 2020		24.8972		1	1	1
58.8	-144.5	3680	8337	138.75	8520	20	9710	40	1190	45	7481.8	1038.2	20	2206	150.75	2095	3	EHOL (7-11)	EW0408-87JC	Praetorius et al., 2020		11.9437		1	1	1
58.8	-144.5	3680	11393	98.5	10715	20	12255	35	1540	40	9968.2	746.8	20	2266	81.25	2095	3		EW0408-87JC	Praetorius et al., 2020		29.4118		1	1	1
58.8	-144.5	3680	11647	79.25	NaN	NaN	12875	50	NaN	NaN	10077	NaN	NaN	2809	65.25	2095	3		EW0408-87JC	Praetorius et al., 2020		29.0698		1	1	1
58.8	-144.5	3680	11733	73.75	10975	30	12695	35	1720	46	10093	882	30	2588	62	2095	3	YD (11.8-12.7)	EW0408-87JC	Praetorius et al., 2020		29.3398		1	1	1
58.8	-144.5	3680	12142	60	11090	25	12970	30	1880	39	10357	733	25	2608	41.75	2095	3	YD (11.8-12.7)	EW0408-87JC	Praetorius et al., 2020		29.106		1	1	1
58.8	-144.5	3680	12623	75.25	11695	30	13100	35	1405	46	10588	1107	30	2531	105.75	2095	3	YD (11.8-12.7)	EW0408-87JC	Praetorius et al., 2020		30.0752		1	1	1
58.8	-144.5	3680	13288	73	12460	40	13800	45	1340	60	11373	1087	40	2389	91.75	2095	3	BA (12.8-14.8)	EW0408-87JC	Praetorius et al., 2020		30.5343		1	1	1
58.8	-144.5	3680	14205	114.5	13170	40	14420	45	1250	60	12305	865	40	2124	108.25	2095	3	BA (12.8-14.8)	EW0408-87JC	Praetorius et al., 2020		32.7869		1	1	1
58.8	-144.5	3680	14571	140	13330	45	14740	60	1410	75	12454	876	45	2307	77.5	2095	3	BA (12.8-14.8)	EW0408-87JC	Praetorius et al., 2020		55.4017		1	1	1
58.8	-144.5	3680	15293	140.25	13830	30	15255	35	1425	46	12828	1002	30	2429	110	2095	3	HS1 (15-17.5)	EW0408-87JC	Praetorius et al., 2020		76.2548		1	1	1
58.8	-144.5	3680	15811	109.75	14290	40	15875	50	1585	64	13188	1102	40	2690	99.75	2095	3	HS1 (15-17.5)	EW0408-87JC	Praetorius et al., 2020		122.291		1	1	1
58.8	-144.5	3680	16134	116.75	14560	70	16180	60	1620	92	13395	1165	70	2780	105	2095	3	HS1 (15-17.5)	EW0408-87JC	Praetorius et al., 2020		196.319		1	1	1
58.8	-144.5	3680	16297	130.5	14840	70	16450	50	1610	86	13513	1327	70	2933	108.25	2095	3	HS1 (15-17.5)	EW0408-87JC	Praetorius et al., 2020		432.432		1	1	1
58.8	-144.5	3680	16408	134.5	14930	60	16630	80	1700	100	13607	1323	60	3031	126.25	2095	3	HS1 (15-17.5)	EW0408-87JC	Praetorius et al., 2020		677.362		1	1	1
58.8	-144.5	3680	16969	186	15060	45	17030	120	1970	128	13915	1145	45	3080	186.75	2095	3	HS1 (15-17.5)	EW0408-87JC	Praetorius et al., 2020		476.744		1	1	1
22.9	-109.5	640	418	155	NaN	NaN	1795	35	NaN	NaN	299	NaN	NaN	1441	165	1283	3	HOL (<6)	ET97-7T	Rafter et al (2019)	Extreme depletions	8.12348	revised cal. ages obtained by 'uncalibrating' publ. cal ages to Intcal13, then recalibrating on Intcal20	0	0	0
22.9	-109.5	640	421	155	NaN	NaN	2030	20	NaN	NaN	306	NaN	NaN	1678	156.5	1283	3	HOL (<6)	ET97-7T	Rafter et al (2019)	Extreme depletions	8.12348	revised cal. ages obtained by 'uncalibrating' publ. cal ages to Intcal13, then recalibrating on Intcal20	0	0	0
22.9	-109.5	640	7807	134	NaN	NaN	8875	25	NaN	NaN	6991	NaN	NaN	1896	158.75	1283	3	EHOL (7-11)	ET97-7T	Rafter et al (2019)	Extreme depletions	1.9305	revised cal. ages obtained by 'uncalibrating' publ. cal ages to Intcal13, then recalibrating on Intcal20	0	0	0
22.9	-109.5	640	7813	136	NaN	NaN	9735	30	NaN	NaN	6977.8	NaN	NaN	2751	161.75	1283	3	EHOL (7-11)	ET97-7T	Rafter et al (2019)	Extreme depletions	1.9305	revised cal. ages obtained by 'uncalibrating' publ. cal ages to Intcal13, then recalibrating on Intcal20	0	0	0
22.9	-109.5	640	9885	167	NaN	NaN	12535	45	NaN	NaN	8792	NaN	NaN	3704	106.5	1283	3	EHOL (7-11)	ET97-7T	Rafter et al (2019)	Extreme depletions	58.8235	revised cal. ages obtained by 'uncalibrating' publ. cal ages to Intcal13, then recalibrating on Intcal20	0	0	0
22.9	-109.5	640	9888	167	NaN	NaN	13165	35	NaN	NaN	8799.8	NaN	NaN	4332	102	1283	3	EHOL (7-11)	ET97-7T	Rafter et al (2019)	Extreme depletions	58.8235	revised cal. ages obtained by 'uncalibrating' publ. cal ages to Intcal13, then recalibrating on Intcal20	0	0	0
22.9	-109.5	640	9922	175	NaN	NaN	14170	140	NaN	NaN	8882.6	NaN	NaN	5323	176.75	1283	3	EHOL (7-11)	ET97-7T	Rafter et al (2019)	Extreme depletions	6.35593	revised cal. ages obtained by 'uncalibrating' publ. cal ages to Intcal13, then recalibrating on Intcal20	0	0	0
22.9	-109.5	640	9923	172	NaN	NaN	12180	30	NaN	NaN	8883.4	NaN	NaN	3331	101	1283	3	EHOL (7-11)	ET97-7T	Rafter et al (2019)	Extreme depletions	6.35593	revised cal. ages obtained by 'uncalibrating' publ. cal ages to Intcal13, then recalibrating on Intcal20	0	0	0
22.9	-109.5	640	9926	175	NaN	NaN	14210	280	NaN	NaN	8885	NaN	NaN	5359	295	1283	3	EHOL (7-11)	ET97-7T	Rafter et al (2019)	Extreme depletions	6.35593	revised cal. ages obtained by 'uncalibrating' publ. cal ages to Intcal13, then recalibrating on Intcal20	0	0	0
22.9	-109.5	640	10398	234	NaN	NaN	14950	180	NaN	NaN	9219.4	NaN	NaN	5722	263.25	1283	3	EHOL (7-11)	ET97-7T	Rafter et al (2019)	Extreme depletions	13.9721	revised cal. ages obtained by 'uncalibrating' publ. cal ages to Intcal13, then recalibrating on Intcal20	0	0	0
22.9	-109.5	640	10400	232	NaN	NaN	14830	160	NaN	NaN	9219	NaN	NaN	5599	249.5	1283	3	EHOL (7-11)	ET97-7T	Rafter et al (2019)	Extreme depletions	13.9721	revised cal. ages obtained by 'uncalibrating' publ. cal ages to Intcal13, then recalibrating on Intcal20	0	0	0
22.9	-109.5	640	10401	234	NaN	NaN	15020	40	NaN	NaN	9219.8	NaN	NaN	5784	130	1283	3	EHOL (7-11)	ET97-7T	Rafter et al (2019)	Extreme depletions	13.9721	revised cal. ages obtained by 'uncalibrating' publ. cal ages to Intcal13, then recalibrating on Intcal20	0	0	0
22.9	-109.5	640	10902	188	NaN	NaN	14360	60	NaN	NaN	9629.4	NaN	NaN	4784	148.75	1283	3	EHOL (7-11)	ET97-7T	Rafter et al (2019)	Extreme depletions	15.186	revised cal. ages obtained by 'uncalibrating' publ. cal ages to Intcal13, then recalibrating on Intcal20	0	0	0
22.9	-109.5	640	10902	192	NaN	NaN	14520	60	NaN	NaN	9629.4	NaN	NaN	4944	153.5	1283	3	EHOL (7-11)	ET97-7T	Rafter et al (2019)	Extreme depletions	15.186	revised cal. ages obtained by 'uncalibrating' publ. cal ages to Intcal13, then recalibrating on Intcal20	0	0	0
22.9	-109.5	640	10906	192	NaN	NaN	14310	180	NaN	NaN	9630	NaN	NaN	4735	216.5	1283	3	EHOL (7-11)	ET97-7T	Rafter et al (2019)	Extreme depletions	15.186	revised cal. ages obtained by 'uncalibrating' publ. cal ages to Intcal13, then recalibrating on Intcal20	0	0	0
22.9	-109.5	640	12223	253	NaN	NaN	15695	50	NaN	NaN	10399	NaN	NaN	5327	150	1283	3	YD (11.8-12.7)	ET97-7T	Rafter et al (2019)	Extreme depletions	15.3453	revised cal. ages obtained by 'uncalibrating' publ. cal ages to Intcal13, then recalibrating on Intcal20	0	0	0
22.9	-109.5	640	12229	256	NaN	NaN	17090	80	NaN	NaN	10386	NaN	NaN	6719	166	1283	3	YD (11.8-12.7)	ET97-7T	Rafter et al (2019)	Extreme depletions	15.3453	revised cal. ages obtained by 'uncalibrating' publ. cal ages to Intcal13, then recalibrating on Intcal20	0	0	0
22.9	-109.5	640	12236	258	NaN	NaN	15683	48	NaN	NaN	10371	NaN	NaN	5311	156.75	1283	3	YD (11.8-12.7)	ET97-7T	Rafter et al (2019)	Extreme depletions	15.3453	revised cal. ages obtained by 'uncalibrating' publ. cal ages to Intcal13, then recalibrating on Intcal20	0	0	0
22.9	-109.5	640	13409	142	NaN	NaN	15595	35	NaN	NaN	11524	NaN	NaN	4055	156.25	1283	3	BA (12.8-14.8)	ET97-7T	Rafter et al (2019)	Extreme depletions	1.86359	revised cal. ages obtained by 'uncalibrating' publ. cal ages to Intcal13, then recalibrating on Intcal20	0	0	0
22.9	-109.5	640	13412	144	NaN	NaN	16025	40	NaN	NaN	11527	NaN	NaN	4482	159	1283	3	BA (12.8-14.8)	ET97-7T	Rafter et al (2019)	Extreme depletions	1.86359	revised cal. ages obtained by 'uncalibrating' publ. cal ages to Intcal13, then recalibrating on Intcal20	0	0	0
22.9	-109.5	640	16095	215	NaN	NaN	16980	40	NaN	NaN	13376	NaN	NaN	3603	157.25	1283	3	HS1 (15-17.5)	ET97-7T	Rafter et al (2019)	Extreme depletions	7.63359	revised cal. ages obtained by 'uncalibrating' publ. cal ages to Intcal13, then recalibrating on Intcal20	0	0	0
22.9	-109.5	640	16100	212	NaN	NaN	16570	45	NaN	NaN	13378	NaN	NaN	3190	156.5	1283	3	HS1 (15-17.5)	ET97-7T	Rafter et al (2019)	Extreme depletions	7.63359	revised cal. ages obtained by 'uncalibrating' publ. cal ages to Intcal13, then recalibrating on Intcal20	0	0	0
22.9	-109.5	640	16362	229	NaN	NaN	16960	40	NaN	NaN	13574	NaN	NaN	3390	156	1283	3	HS1 (15-17.5)	ET97-7T	Rafter et al (2019)	Extreme depletions	10	revised cal. ages obtained by 'uncalibrating' publ. cal ages to Intcal13, then recalibrating on Intcal20	0	0	0
22.9	-109.5	640	16562	216	NaN	NaN	17295	45	NaN	NaN	13696	NaN	NaN	3594	145.25	1283	3	HS1 (15-17.5)	ET97-7T	Rafter et al (2019)	Extreme depletions	10.5263	revised cal. ages obtained by 'uncalibrating' publ. cal ages to Intcal13, then recalibrating on Intcal20	0	0	0
22.9	-109.5	640	16657	203	NaN	NaN	17230	130	NaN	NaN	13766	NaN	NaN	3475	184	1283	3	HS1 (15-17.5)	ET97-7T	Rafter et al (2019)	Extreme depletions	10.5263	revised cal. ages obtained by 'uncalibrating' publ. cal ages to Intcal13, then recalibrating on Intcal20	0	0	0
22.9	-109.5	640	16660.5	204	NaN	NaN	17620	70	NaN	NaN	13768	NaN	NaN	3860	152.25	1283	3	HS1 (15-17.5)	ET97-7T	Rafter et al (2019)	Extreme depletions	10.5263	revised cal. ages obtained by 'uncalibrating' publ. cal ages to Intcal13, then recalibrating on Intcal20	0	0	0
22.9	-109.5	150	10892	193	15730	270	NaN	NaN	NaN	NaN	9623.6	6106.4	270	6161	291.5	757	3	EHOL (7-11)	LPAZ21P	Rafter et al (2019)	Extreme depletions	6.1054	revised cal. ages obtained by 'uncalibrating' publ. cal ages to Intcal13, then recalibrating on Intcal20	0	0	0
22.9	-109.5	150	11451	256	14090	60	NaN	NaN	NaN	NaN	10010	4080	60	4086	186.25	757	3		LPAZ21P	Rafter et al (2019)	Extreme depletions	5.93835	revised cal. ages obtained by 'uncalibrating' publ. cal ages to Intcal13, then recalibrating on Intcal20	0	0	0
22.9	-109.5	150	11574	249	15630	80	NaN	NaN	NaN	NaN	10025	5605	80	5579	187.25	757	3	YD (11.8-12.7)	LPAZ21P	Rafter et al (2019)	Extreme depletions	6.04804	revised cal. ages obtained by 'uncalibrating' publ. cal ages to Intcal13, then recalibrating on Intcal20	0	0	0
22.9	-109.5	150	11577	257	14950	80	NaN	NaN	NaN	NaN	10023	4927	80	4897	191.75	757	3	YD (11.8-12.7)	LPAZ21P	Rafter et al (2019)	Extreme depletions	6.04647	revised cal. ages obtained by 'uncalibrating' publ. cal ages to Intcal13, then recalibrating on Intcal20	0	0	0
22.9	-109.5	150	11962	298	15630	90	NaN	NaN	NaN	NaN	10277	5353	90	5369	168	757	3	YD (11.8-12.7)	LPAZ21P	Rafter et al (2019)	Extreme depletions	6.10266	revised cal. ages obtained by 'uncalibrating' publ. cal ages to Intcal13, then recalibrating on Intcal20	0	0	0
22.9	-109.5	150	12229	254	15280	100	NaN	NaN	NaN	NaN	10386	4894	100	4909	174	757	3	YD (11.8-12.7)	LPAZ21P	Rafter et al (2019)	Extreme depletions	6.13296	revised cal. ages obtained by 'uncalibrating' publ. cal ages to Intcal13, then recalibrating on Intcal20	0	0	0
22.9	-109.5	150	12723	209	16155	50	NaN	NaN	NaN	NaN	10709	5446	50	5407	217.25	757	3		LPAZ21P	Rafter et al (2019)	Extreme depletions	6.13063	revised cal. ages obtained by 'uncalibrating' publ. cal ages to Intcal13, then recalibrating on Intcal20	0	0	0
22.9	-109.5	150	12992	128	16660	100	NaN	NaN	NaN	NaN	11050	5610	100	5597	172.5	757	3	BA (12.8-14.8)	LPAZ21P	Rafter et al (2019)	Extreme depletions	6.15764	revised cal. ages obtained by 'uncalibrating' publ. cal ages to Intcal13, then recalibrating on Intcal20	0	0	0
22.9	-109.5	150	13577	166	17060	440	NaN	NaN	NaN	NaN	11689	5371	440	5333	463.5	757	3	BA (12.8-14.8)	LPAZ21P	Rafter et al (2019)	Extreme depletions	6.11328	revised cal. ages obtained by 'uncalibrating' publ. cal ages to Intcal13, then recalibrating on Intcal20	0	0	0
22.9	-109.5	150	13578	166	17040	100	NaN	NaN	NaN	NaN	11693	5347	100	5304	195.75	757	3	BA (12.8-14.8)	LPAZ21P	Rafter et al (2019)	Extreme depletions	6.11283	revised cal. ages obtained by 'uncalibrating' publ. cal ages to Intcal13, then recalibrating on Intcal20	0	0	0
22.9	-109.5	150	13694	156	15920	110	NaN	NaN	NaN	NaN	11836	4084	110	4077	185.75	757	3	BA (12.8-14.8)	LPAZ21P	Rafter et al (2019)	Extreme depletions	6.2071	revised cal. ages obtained by 'uncalibrating' publ. cal ages to Intcal13, then recalibrating on Intcal20	0	0	0
22.9	-109.5	150	13941	265	17600	60	NaN	NaN	NaN	NaN	12019	5581	60	5547	220.5	757	3	BA (12.8-14.8)	LPAZ21P	Rafter et al (2019)	Extreme depletions	6.16885	revised cal. ages obtained by 'uncalibrating' publ. cal ages to Intcal13, then recalibrating on Intcal20	0	0	0
22.9	-109.5	150	14539	253	17080	340	NaN	NaN	NaN	NaN	12439	4641	340	4666	349.75	757	3	BA (12.8-14.8)	LPAZ21P	Rafter et al (2019)	Extreme depletions	6.05269	revised cal. ages obtained by 'uncalibrating' publ. cal ages to Intcal13, then recalibrating on Intcal20	0	0	0
22.9	-109.5	150	14558	255	16910	340	NaN	NaN	NaN	NaN	12448	4462	340	4490	349.75	757	3	BA (12.8-14.8)	LPAZ21P	Rafter et al (2019)	Extreme depletions	6.04479	revised cal. ages obtained by 'uncalibrating' publ. cal ages to Intcal13, then recalibrating on Intcal20	0	0	0
22.9	-109.5	150	16356	240	17800	180	NaN	NaN	NaN	NaN	13568	4232	180	4240	239.5	757	3	HS1 (15-17.5)	LPAZ21P	Rafter et al (2019)	Extreme depletions	5.56371	revised cal. ages obtained by 'uncalibrating' publ. cal ages to Intcal13, then recalibrating on Intcal20	0	0	0
22.9	-109.5	150	16358.5	235	17550	120	NaN	NaN	NaN	NaN	13571	3979	120	3987	196.5	757	3	HS1 (15-17.5)	LPAZ21P	Rafter et al (2019)	Extreme depletions	5.56286	revised cal. ages obtained by 'uncalibrating' publ. cal ages to Intcal13, then recalibrating on Intcal20	0	0	0
22.9	-109.5	150	16746	203	16650	160	NaN	NaN	NaN	NaN	13810	2840	160	2844	208.5	757	3	HS1 (15-17.5)	LPAZ21P	Rafter et al (2019)	Extreme depletions	5.55357	revised cal. ages obtained by 'uncalibrating' publ. cal ages to Intcal13, then recalibrating on Intcal20	0	0	0
22.9	-109.5	150	18493	132	16560	60	NaN	NaN	NaN	NaN	15154	1406	60	1373	132.5	757	3		LPAZ21P	Rafter et al (2019)	Extreme depletions	5.19115	revised cal. ages obtained by 'uncalibrating' publ. cal ages to Intcal13, then recalibrating on Intcal20	0	0	0
22.9	-109.5	150	18496	134	17060	110	NaN	NaN	NaN	NaN	15149	1911	110	1871	161.25	757	3		LPAZ21P	Rafter et al (2019)	Extreme depletions	5.16328	revised cal. ages obtained by 'uncalibrating' publ. cal ages to Intcal13, then recalibrating on Intcal20	0	0	0
22.9	-109.5	150	20728	164	19660	70	NaN	NaN	NaN	NaN	17138	2522	70	2498	174.75	757	3	LGM (19-21.8)	LPAZ21P	Rafter et al (2019)	Extreme depletions	4.65554	revised cal. ages obtained by 'uncalibrating' publ. cal ages to Intcal13, then recalibrating on Intcal20	0	0	0
22.9	-109.5	150	20917	197	19560	560	NaN	NaN	NaN	NaN	17356	2204	560	2214	576.75	757	3	LGM (19-21.8)	LPAZ21P	Rafter et al (2019)	Extreme depletions	4.68518	revised cal. ages obtained by 'uncalibrating' publ. cal ages to Intcal13, then recalibrating on Intcal20	0	0	0
22.9	-109.5	150	21645	231	20210	80	NaN	NaN	NaN	NaN	17792	2418	80	2389	170	757	3	LGM (19-21.8)	LPAZ21P	Rafter et al (2019)	Extreme depletions	4.6893	revised cal. ages obtained by 'uncalibrating' publ. cal ages to Intcal13, then recalibrating on Intcal20	0	0	0
22.9	-109.5	150	22026	204	20970	190	NaN	NaN	NaN	NaN	18064	2906	190	2890	268.25	757	3		LPAZ21P	Rafter et al (2019)	Extreme depletions	4.67629	revised cal. ages obtained by 'uncalibrating' publ. cal ages to Intcal13, then recalibrating on Intcal20	0	0	0
22.9	-109.5	150	22030	204	20940	500	NaN	NaN	NaN	NaN	18069	2871	500	2849	527	757	3		LPAZ21P	Rafter et al (2019)	Extreme depletions	4.67544	revised cal. ages obtained by 'uncalibrating' publ. cal ages to Intcal13, then recalibrating on Intcal20	0	0	0
22.9	-109.5	150	23046	250	21810	210	NaN	NaN	NaN	NaN	19194	2616	210	2661	322.75	757	3		LPAZ21P	Rafter et al (2019)	Extreme depletions	4.55611	revised cal. ages obtained by 'uncalibrating' publ. cal ages to Intcal13, then recalibrating on Intcal20	0	0	0
22.9	-109.5	150	24423	219	22640	100	NaN	NaN	NaN	NaN	20353	2287	100	2287	191	757	3		LPAZ21P	Rafter et al (2019)	Extreme depletions	4.56537	revised cal. ages obtained by 'uncalibrating' publ. cal ages to Intcal13, then recalibrating on Intcal20	0	0	0
22.9	-109.5	150	26702	174	24910	200	NaN	NaN	NaN	NaN	22385	2525	200	2504	238.75	757	3	preLGM (25-30)	LPAZ21P	Rafter et al (2019)	Extreme depletions	4.38169	revised cal. ages obtained by 'uncalibrating' publ. cal ages to Intcal13, then recalibrating on Intcal20	0	0	0
22.9	-109.5	150	26706	177	25520	320	NaN	NaN	NaN	NaN	22383	3137	320	3114	342	757	3	preLGM (25-30)	LPAZ21P	Rafter et al (2019)	Extreme depletions	4.38104	revised cal. ages obtained by 'uncalibrating' publ. cal ages to Intcal13, then recalibrating on Intcal20	0	0	0
22.9	-109.5	150	27725	130	27090	300	NaN	NaN	NaN	NaN	23502	3588	300	3544	374.5	757	3	preLGM (25-30)	LPAZ21P	Rafter et al (2019)	Extreme depletions	4.31019	revised cal. ages obtained by 'uncalibrating' publ. cal ages to Intcal13, then recalibrating on Intcal20	0	0	0
22.9	-109.5	150	29461	176	26560	550	NaN	NaN	NaN	NaN	25252	1308	550	1319	554	757	3	preLGM (25-30)	LPAZ21P	Rafter et al (2019)	Extreme depletions	4.17501	revised cal. ages obtained by 'uncalibrating' publ. cal ages to Intcal13, then recalibrating on Intcal20	0	0	0
22.9	-109.5	150	31069	72	29970	630	NaN	NaN	NaN	NaN	26823	3147	630	3110	654	757	3		LPAZ21P	Rafter et al (2019)	Extreme depletions	4.08768	revised cal. ages obtained by 'uncalibrating' publ. cal ages to Intcal13, then recalibrating on Intcal20	0	0	0
22.9	-109.5	624	4313	218	NaN	NaN	5670	60	NaN	NaN	3900	NaN	NaN	1785	161.25	1283	3	HOL (<6)	LPAZ21P	Rafter et al (2019)	Extreme depletions	5.36242	revised cal. ages obtained by 'uncalibrating' publ. cal ages to Intcal13, then recalibrating on Intcal20	0	0	0
22.9	-109.5	624	4313	218	NaN	NaN	5832	58	NaN	NaN	3900	NaN	NaN	1947	160.5	1283	3	HOL (<6)	LPAZ21P	Rafter et al (2019)	Extreme depletions	5.36242	revised cal. ages obtained by 'uncalibrating' publ. cal ages to Intcal13, then recalibrating on Intcal20	0	0	0
22.9	-109.5	624	4313	220	NaN	NaN	5955	40	NaN	NaN	3900	NaN	NaN	2072	154	1283	3	HOL (<6)	LPAZ21P	Rafter et al (2019)	Extreme depletions	5.36242	revised cal. ages obtained by 'uncalibrating' publ. cal ages to Intcal13, then recalibrating on Intcal20	0	0	0
22.9	-109.5	624	6076	161	NaN	NaN	8470	70	NaN	NaN	5311.8	NaN	NaN	3167	167.75	1283	3	HOL (<6)	LPAZ21P	Rafter et al (2019)	Extreme depletions	5.36242	revised cal. ages obtained by 'uncalibrating' publ. cal ages to Intcal13, then recalibrating on Intcal20	0	0	0
22.9	-109.5	624	6309	165	NaN	NaN	7215	20	NaN	NaN	5552.6	NaN	NaN	1673	145.5	1283	3		LPAZ21P	Rafter et al (2019)	Extreme depletions	5.36242	revised cal. ages obtained by 'uncalibrating' publ. cal ages to Intcal13, then recalibrating on Intcal20	0	0	0
22.9	-109.5	624	6310	168	NaN	NaN	7215	20	NaN	NaN	5556	NaN	NaN	1671	148	1283	3		LPAZ21P	Rafter et al (2019)	Extreme depletions	5.36242	revised cal. ages obtained by 'uncalibrating' publ. cal ages to Intcal13, then recalibrating on Intcal20	0	0	0
22.9	-109.5	624	7748.5	127	NaN	NaN	8360	140	NaN	NaN	6935.2	NaN	NaN	1437	199	1283	3	EHOL (7-11)	LPAZ21P	Rafter et al (2019)	Extreme depletions	5.36242	revised cal. ages obtained by 'uncalibrating' publ. cal ages to Intcal13, then recalibrating on Intcal20	0	0	0
22.9	-109.5	624	7750	126	NaN	NaN	8425	23	NaN	NaN	6937	NaN	NaN	1490	148.25	1283	3	EHOL (7-11)	LPAZ21P	Rafter et al (2019)	Extreme depletions	5.36242	revised cal. ages obtained by 'uncalibrating' publ. cal ages to Intcal13, then recalibrating on Intcal20	0	0	0
22.9	-109.5	624	8006	150	NaN	NaN	9320	120	NaN	NaN	7183.2	NaN	NaN	2118	195	1283	3	EHOL (7-11)	LPAZ21P	Rafter et al (2019)	Extreme depletions	5.36242	revised cal. ages obtained by 'uncalibrating' publ. cal ages to Intcal13, then recalibrating on Intcal20	0	0	0
22.9	-109.5	624	8008	151	NaN	NaN	9185	25	NaN	NaN	7187.6	NaN	NaN	1970	147.25	1283	3	EHOL (7-11)	LPAZ21P	Rafter et al (2019)	Extreme depletions	5.36242	revised cal. ages obtained by 'uncalibrating' publ. cal ages to Intcal13, then recalibrating on Intcal20	0	0	0
22.9	-109.5	624	8107	141	NaN	NaN	8865	35	NaN	NaN	7293	NaN	NaN	1556	147.25	1283	3	EHOL (7-11)	LPAZ21P	Rafter et al (2019)	Extreme depletions	5.36242	revised cal. ages obtained by 'uncalibrating' publ. cal ages to Intcal13, then recalibrating on Intcal20	0	0	0
22.9	-109.5	624	8395	182	NaN	NaN	9075	35	NaN	NaN	7602	NaN	NaN	1465	179.5	1283	3	EHOL (7-11)	LPAZ21P	Rafter et al (2019)	Extreme depletions	5.36242	revised cal. ages obtained by 'uncalibrating' publ. cal ages to Intcal13, then recalibrating on Intcal20	0	0	0
22.9	-109.5	624	8773	193	NaN	NaN	9078	30	NaN	NaN	7949.8	NaN	NaN	1132	149.25	1283	3	EHOL (7-11)	LPAZ21P	Rafter et al (2019)	Extreme depletions	5.36242	revised cal. ages obtained by 'uncalibrating' publ. cal ages to Intcal13, then recalibrating on Intcal20	0	0	0
22.9	-109.5	624	8931	205	NaN	NaN	9265	30	NaN	NaN	7961	NaN	NaN	1265	136.5	1283	3	EHOL (7-11)	LPAZ21P	Rafter et al (2019)	Extreme depletions	5.36242	revised cal. ages obtained by 'uncalibrating' publ. cal ages to Intcal13, then recalibrating on Intcal20	0	0	0
22.9	-109.5	624	8936	206	NaN	NaN	9370	25	NaN	NaN	7965.8	NaN	NaN	1370	133.5	1283	3	EHOL (7-11)	LPAZ21P	Rafter et al (2019)	Extreme depletions	5.36242	revised cal. ages obtained by 'uncalibrating' publ. cal ages to Intcal13, then recalibrating on Intcal20	0	0	0
22.9	-109.5	624	9923	175	NaN	NaN	14105	48	NaN	NaN	8883.4	NaN	NaN	5257	112.5	1283	3	EHOL (7-11)	LPAZ21P	Rafter et al (2019)	Extreme depletions	5.36242	revised cal. ages obtained by 'uncalibrating' publ. cal ages to Intcal13, then recalibrating on Intcal20	0	0	0
22.9	-109.5	624	9924	174	NaN	NaN	12205	30	NaN	NaN	8884.2	NaN	NaN	3356	101.25	1283	3	EHOL (7-11)	LPAZ21P	Rafter et al (2019)	Extreme depletions	5.36242	revised cal. ages obtained by 'uncalibrating' publ. cal ages to Intcal13, then recalibrating on Intcal20	0	0	0
22.9	-109.5	624	10885	194	NaN	NaN	15210	45	NaN	NaN	9619	NaN	NaN	5638	147	1283	3	EHOL (7-11)	LPAZ21P	Rafter et al (2019)	Extreme depletions	5.36242	revised cal. ages obtained by 'uncalibrating' publ. cal ages to Intcal13, then recalibrating on Intcal20	0	0	0
22.9	-109.5	624	10886	196	NaN	NaN	16880	650	NaN	NaN	9619.6	NaN	NaN	7313	648.5	1283	3	EHOL (7-11)	LPAZ21P	Rafter et al (2019)	Extreme depletions	5.36242	revised cal. ages obtained by 'uncalibrating' publ. cal ages to Intcal13, then recalibrating on Intcal20	0	0	0
22.9	-109.5	624	10889.5	191	NaN	NaN	15150	280	NaN	NaN	9621.7	NaN	NaN	5582	299.5	1283	3	EHOL (7-11)	LPAZ21P	Rafter et al (2019)	Extreme depletions	5.36242	revised cal. ages obtained by 'uncalibrating' publ. cal ages to Intcal13, then recalibrating on Intcal20	0	0	0
22.9	-109.5	624	11452	253	NaN	NaN	13600	50	NaN	NaN	10009	NaN	NaN	3594	182	1283	3		LPAZ21P	Rafter et al (2019)	Extreme depletions	5.36242	revised cal. ages obtained by 'uncalibrating' publ. cal ages to Intcal13, then recalibrating on Intcal20	0	0	0
22.9	-109.5	624	11455	257	NaN	NaN	14360	150	NaN	NaN	10007	NaN	NaN	4370	230.5	1283	3		LPAZ21P	Rafter et al (2019)	Extreme depletions	5.36242	revised cal. ages obtained by 'uncalibrating' publ. cal ages to Intcal13, then recalibrating on Intcal20	0	0	0
22.9	-109.5	624	11572	256	NaN	NaN	14030	110	NaN	NaN	10026	NaN	NaN	3979	202	1283	3	YD (11.8-12.7)	LPAZ21P	Rafter et al (2019)	Extreme depletions	5.36242	revised cal. ages obtained by 'uncalibrating' publ. cal ages to Intcal13, then recalibrating on Intcal20	0	0	0
22.9	-109.5	624	11574	252	NaN	NaN	14870	170	NaN	NaN	10025	NaN	NaN	4819	231	1283	3	YD (11.8-12.7)	LPAZ21P	Rafter et al (2019)	Extreme depletions	5.36242	revised cal. ages obtained by 'uncalibrating' publ. cal ages to Intcal13, then recalibrating on Intcal20	0	0	0
22.9	-109.5	624	11574	257	NaN	NaN	15120	90	NaN	NaN	10025	NaN	NaN	5068	195.25	1283	3	YD (11.8-12.7)	LPAZ21P	Rafter et al (2019)	Extreme depletions	5.36242	revised cal. ages obtained by 'uncalibrating' publ. cal ages to Intcal13, then recalibrating on Intcal20	0	0	0
22.9	-109.5	624	11579	259	NaN	NaN	14610	180	NaN	NaN	10020	NaN	NaN	4557	240.5	1283	3	YD (11.8-12.7)	LPAZ21P	Rafter et al (2019)	Extreme depletions	5.36242	revised cal. ages obtained by 'uncalibrating' publ. cal ages to Intcal13, then recalibrating on Intcal20	0	0	0
22.9	-109.5	624	11973	296	NaN	NaN	15600	60	NaN	NaN	10290	NaN	NaN	5325	150.25	1283	3	YD (11.8-12.7)	LPAZ21P	Rafter et al (2019)	Extreme depletions	5.36242	revised cal. ages obtained by 'uncalibrating' publ. cal ages to Intcal13, then recalibrating on Intcal20	0	0	0
22.9	-109.5	624	12219	251	NaN	NaN	15340	70	NaN	NaN	10408	NaN	NaN	4973	155	1283	3	YD (11.8-12.7)	LPAZ21P	Rafter et al (2019)	Extreme depletions	5.36242	revised cal. ages obtained by 'uncalibrating' publ. cal ages to Intcal13, then recalibrating on Intcal20	0	0	0
22.9	-109.5	624	12227	252	NaN	NaN	17740	60	NaN	NaN	10391	NaN	NaN	7370	153.5	1283	3	YD (11.8-12.7)	LPAZ21P	Rafter et al (2019)	Extreme depletions	5.36242	revised cal. ages obtained by 'uncalibrating' publ. cal ages to Intcal13, then recalibrating on Intcal20	0	0	0
22.9	-109.5	624	12227.5	260	NaN	NaN	17200	70	NaN	NaN	10390	NaN	NaN	6830	165	1283	3	YD (11.8-12.7)	LPAZ21P	Rafter et al (2019)	Extreme depletions	5.36242	revised cal. ages obtained by 'uncalibrating' publ. cal ages to Intcal13, then recalibrating on Intcal20	0	0	0
22.9	-109.5	624	12229	249	NaN	NaN	15965	45	NaN	NaN	10386	NaN	NaN	5595	146.25	1283	3	YD (11.8-12.7)	LPAZ21P	Rafter et al (2019)	Extreme depletions	5.36242	revised cal. ages obtained by 'uncalibrating' publ. cal ages to Intcal13, then recalibrating on Intcal20	0	0	0
22.9	-109.5	624	12718	210	NaN	NaN	17640	60	NaN	NaN	10691	NaN	NaN	6905	221.5	1283	3		LPAZ21P	Rafter et al (2019)	Extreme depletions	5.36242	revised cal. ages obtained by 'uncalibrating' publ. cal ages to Intcal13, then recalibrating on Intcal20	0	0	0
22.9	-109.5	624	12720	207	NaN	NaN	16760	70	NaN	NaN	10696	NaN	NaN	6016	225.25	1283	3		LPAZ21P	Rafter et al (2019)	Extreme depletions	5.36242	revised cal. ages obtained by 'uncalibrating' publ. cal ages to Intcal13, then recalibrating on Intcal20	0	0	0
22.9	-109.5	624	12720	211	NaN	NaN	18400	90	NaN	NaN	10696	NaN	NaN	7652	238.5	1283	3		LPAZ21P	Rafter et al (2019)	Extreme depletions	5.36242	revised cal. ages obtained by 'uncalibrating' publ. cal ages to Intcal13, then recalibrating on Intcal20	0	0	0
22.9	-109.5	624	12722	207	NaN	NaN	15800	45	NaN	NaN	10704	NaN	NaN	5057	212.5	1283	3		LPAZ21P	Rafter et al (2019)	Extreme depletions	5.36242	revised cal. ages obtained by 'uncalibrating' publ. cal ages to Intcal13, then recalibrating on Intcal20	0	0	0
22.9	-109.5	624	12991	127	NaN	NaN	15720	150	NaN	NaN	11049	NaN	NaN	4653	202.75	1283	3	BA (12.8-14.8)	LPAZ21P	Rafter et al (2019)	Extreme depletions	5.36242	revised cal. ages obtained by 'uncalibrating' publ. cal ages to Intcal13, then recalibrating on Intcal20	0	0	0
22.9	-109.5	624	12994	128	NaN	NaN	14540	70	NaN	NaN	11051	NaN	NaN	3480	156.25	1283	3	BA (12.8-14.8)	LPAZ21P	Rafter et al (2019)	Extreme depletions	5.36242	revised cal. ages obtained by 'uncalibrating' publ. cal ages to Intcal13, then recalibrating on Intcal20	0	0	0
22.9	-109.5	624	12994	126	NaN	NaN	16970	70	NaN	NaN	11051	NaN	NaN	5911	153.75	1283	3	BA (12.8-14.8)	LPAZ21P	Rafter et al (2019)	Extreme depletions	5.36242	revised cal. ages obtained by 'uncalibrating' publ. cal ages to Intcal13, then recalibrating on Intcal20	0	0	0
22.9	-109.5	624	12998	127	NaN	NaN	16550	45	NaN	NaN	11055	NaN	NaN	5492	142.5	1283	3	BA (12.8-14.8)	LPAZ21P	Rafter et al (2019)	Extreme depletions	5.36242	revised cal. ages obtained by 'uncalibrating' publ. cal ages to Intcal13, then recalibrating on Intcal20	0	0	0
22.9	-109.5	624	13578	168	NaN	NaN	17520	80	NaN	NaN	11693	NaN	NaN	5781	188.25	1283	3	BA (12.8-14.8)	LPAZ21P	Rafter et al (2019)	Extreme depletions	5.36242	revised cal. ages obtained by 'uncalibrating' publ. cal ages to Intcal13, then recalibrating on Intcal20	0	0	0
22.9	-109.5	624	13578	167	NaN	NaN	17620	70	NaN	NaN	11693	NaN	NaN	5879	183.5	1283	3	BA (12.8-14.8)	LPAZ21P	Rafter et al (2019)	Extreme depletions	5.36242	revised cal. ages obtained by 'uncalibrating' publ. cal ages to Intcal13, then recalibrating on Intcal20	0	0	0
22.9	-109.5	624	13692	159	NaN	NaN	17880	150	NaN	NaN	11836	NaN	NaN	6039	213	1283	3	BA (12.8-14.8)	LPAZ21P	Rafter et al (2019)	Extreme depletions	5.36242	revised cal. ages obtained by 'uncalibrating' publ. cal ages to Intcal13, then recalibrating on Intcal20	0	0	0
22.9	-109.5	624	13695	158	NaN	NaN	16935	45	NaN	NaN	11836	NaN	NaN	5097	155.75	1283	3	BA (12.8-14.8)	LPAZ21P	Rafter et al (2019)	Extreme depletions	5.36242	revised cal. ages obtained by 'uncalibrating' publ. cal ages to Intcal13, then recalibrating on Intcal20	0	0	0
22.9	-109.5	624	13697	158	NaN	NaN	14600	60	NaN	NaN	11835	NaN	NaN	2758	161.75	1283	3	BA (12.8-14.8)	LPAZ21P	Rafter et al (2019)	Extreme depletions	5.36242	revised cal. ages obtained by 'uncalibrating' publ. cal ages to Intcal13, then recalibrating on Intcal20	0	0	0
22.9	-109.5	624	13697	159	NaN	NaN	16640	140	NaN	NaN	11835	NaN	NaN	4794	206	1283	3	BA (12.8-14.8)	LPAZ21P	Rafter et al (2019)	Extreme depletions	5.36242	revised cal. ages obtained by 'uncalibrating' publ. cal ages to Intcal13, then recalibrating on Intcal20	0	0	0
22.9	-109.5	624	13938	255	NaN	NaN	17760	60	NaN	NaN	12023	NaN	NaN	5709	214.5	1283	3	BA (12.8-14.8)	LPAZ21P	Rafter et al (2019)	Extreme depletions	5.36242	revised cal. ages obtained by 'uncalibrating' publ. cal ages to Intcal13, then recalibrating on Intcal20	0	0	0
22.9	-109.5	624	13941	282	NaN	NaN	18300	50	NaN	NaN	12019	NaN	NaN	6248	228	1283	3	BA (12.8-14.8)	LPAZ21P	Rafter et al (2019)	Extreme depletions	5.36242	revised cal. ages obtained by 'uncalibrating' publ. cal ages to Intcal13, then recalibrating on Intcal20	0	0	0
22.9	-109.5	624	14548	251	NaN	NaN	17495	50	NaN	NaN	12444	NaN	NaN	5074	121.5	1283	3	BA (12.8-14.8)	LPAZ21P	Rafter et al (2019)	Extreme depletions	5.36242	revised cal. ages obtained by 'uncalibrating' publ. cal ages to Intcal13, then recalibrating on Intcal20	0	0	0
22.9	-109.5	624	14551.5	254	NaN	NaN	17615	50	NaN	NaN	12446	NaN	NaN	5193	124	1283	3	BA (12.8-14.8)	LPAZ21P	Rafter et al (2019)	Extreme depletions	5.36242	revised cal. ages obtained by 'uncalibrating' publ. cal ages to Intcal13, then recalibrating on Intcal20	0	0	0
22.9	-109.5	624	14554	255	NaN	NaN	15720	90	NaN	NaN	12447	NaN	NaN	3299	142.25	1283	3	BA (12.8-14.8)	LPAZ21P	Rafter et al (2019)	Extreme depletions	5.36242	revised cal. ages obtained by 'uncalibrating' publ. cal ages to Intcal13, then recalibrating on Intcal20	0	0	0
22.9	-109.5	624	15466	207	NaN	NaN	15895	40	NaN	NaN	12921	NaN	NaN	2963	157.25	1283	3	HS1 (15-17.5)	LPAZ21P	Rafter et al (2019)	Extreme depletions	5.36242	revised cal. ages obtained by 'uncalibrating' publ. cal ages to Intcal13, then recalibrating on Intcal20	0	0	0
22.9	-109.5	624	16359	232	NaN	NaN	18130	80	NaN	NaN	13571	NaN	NaN	4565	173.25	1283	3	HS1 (15-17.5)	LPAZ21P	Rafter et al (2019)	Extreme depletions	5.36242	revised cal. ages obtained by 'uncalibrating' publ. cal ages to Intcal13, then recalibrating on Intcal20	0	0	0
22.9	-109.5	624	16361	238	NaN	NaN	18260	310	NaN	NaN	13573	NaN	NaN	4697	344	1283	3	HS1 (15-17.5)	LPAZ21P	Rafter et al (2019)	Extreme depletions	5.36242	revised cal. ages obtained by 'uncalibrating' publ. cal ages to Intcal13, then recalibrating on Intcal20	0	0	0
22.9	-109.5	624	16740.5	203	NaN	NaN	17535	45	NaN	NaN	13808	NaN	NaN	3731	153.25	1283	3	HS1 (15-17.5)	LPAZ21P	Rafter et al (2019)	Extreme depletions	5.36242	revised cal. ages obtained by 'uncalibrating' publ. cal ages to Intcal13, then recalibrating on Intcal20	0	0	0
[truncated: 1,235 more rows]
